# Supplementary material for: Development and Validation of a Machine Learning-Based Risk Prediction Model for Ischemic Stroke-Diabetes Comorbidity
Source: Research Square preprint supplement (doi:10.21203/rs.3.rs-8265041/v1), 2025-12-23
Supplement: Supplementary file 1 [file 466a7f230a44809ee88daffe.docx]

**Supplementary Table 2.**

The Features of the Included Study Participants and the Results of Univariate Analysis

| **Feature** | **total number of people** | **Non-comorbid cases** | **Comorbid cases** | ***P* Value** |
| --- | --- | --- | --- | --- |
| **N=16406** | **N=16334** | **N=72** |
| Gender，n(%) |  |  |  | 0.599 |
| Male | 7463(45.49) | 7428(45.48) | 35(48.61) |  |
| Female | 8943(54.51) | 8906(54.52) | 37(51.39) |  |
| Age | 70.02±10.07 | 69.72±9.23 | 74.53±7.23 | ＜0.001 |
| Education level，n(%) |  |  |  | 0.094 |
| Minimal Formal Education | 88(0.54) | 87(0.53) | 1(1.39) |  |
| High school/vocational | 10096(61.54) | 10046(61.51) | 50(69.44) |  |
| College+ | 6222(37.92) | 6201(37.96) | 21(29.17) |  |
| Marital Status，n(%) |  |  |  | 0.012 |
| Single | 270(1.65) | 270(1.65) | 0(0) |  |
| Married | 14996(91.40) | 14936(91.44) | 60(83.33) |  |
| Divorced/Widowed | 1140(6.95) | 1128(6.91) | 12(16.67) |  |
| Employment Status，n(%) |  |  |  | 0.308 |
| Unemployed | 2969(18.10) | 2959(18.12) | 10(13.89) |  |
| Employed | 13437(81.90) | 13375(81.88) | 62(86.11) |  |
| Diabetes Family History，n(%) |  |  |  | 0.529 |
| No | 15968(97.33) | 15899(97.34) | 69(95.83) |  |
| Yes | 438(2.67) | 435(2.66) | 3(4.17) |  |
| Stroke Family History，n(%) |  |  |  | 0.155 |
| No | 16280(99.23) | 16211(99.25) | 69(95.83) |  |
| Yes | 126(0.77) | 123(0.75) | 3(4.17) |  |
| Albumin (g/L) | 45.41±3.77 | 45.41±3.76 | 45.2±5.55 | 0.752 |
| Hemoglobin (g/L) | 138.25±14.76 | 138.23±14.75 | 139.81±16.93 | 0.435 |
| Platelet (×10⁹/L) | 214.55±54.01 | 214.55±54.03 | 213.78±48.70 | 0.893 |
| White Blood Cell (×10⁹/L) | 6.15±2.12 | 6.15±2.12 | 7.01±1.56 | ＜0.001 |
| BMI(kg/m2) | 24.65±16.00 | 24.65±16.04 | 25.41±3.07 | 0.051 |
| Urea Nitrogen (mmol/L) | 6.09±2.47 | 6.09±2.47 | 6.46±2.21 | 0.162 |
| Direct Bilirubin (µmol/L) | 2.77±1.84 | 2.77±1.84 | 2.72±1.71 | 0.796 |
| Diastolic Blood Pressure (mmHg) | 75.99±6.36 | 75.99±6.36 | 76.54±5.23 | 0.372 |
| Fasting Glucose (mmol/L) | 6.1±1.23 | 6.1±1.23 | 6.62±1.27 | ＜0.001 |
| HbA1c (%) | 6.32±0.81 | 6.32±0.8 | 7.38±1.08 | ＜0.001 |
| HDL Cholesterol | 1.36±0.36 | 1.36±0.36 | 1.27±0.32 | 0.017 |
| Height (CM) | 164.14±8.39 | 164.14±8.39 | 162.57±8.84 | 0.137 |
| Hip Circumference (CM) | 95.99±7.61 | 95.99±7.61 | 97.56±7.36 | 0.075 |
| Serum Potassium (mmol/L) | 4.26±0.37 | 4.26±0.37 | 4.22±0.43 | 0.384 |
| LDL Cholesterol  (mmol/L) | 3.11±1.05 | 3.11±1.05 | 2.76±0.89 | 0.002 |
| Serum Sodium (mmol/L) | 139.48±2.51 | 139.49±2.50 | 137.54±3.62 | ＜0.001 |
| Systolic Blood Pressure (mmHg) | 129.81±10.66 | 129.8±10.66 | 133.17±9.69 | 0.004 |
| Serum Creatinine (µmol/L) | 74.79±23.67 | 74.72±23.48 | 89.69±49.13 | 0.012 |
| AST(U/L) | 23.19±9.09 | 23.19±9.1 | 21.98±6.21 | 0.104 |
| ALT(U/L) | 22.17±14.92 | 22.18±14.93 | 19.27±10.83 | 0.026 |
| Total Bilirubin (µmol/L) | 12.46±5.8 | 12.47±5.8 | 11.42±4.69 | 0.065 |
| Total Cholesterol (mmol/L) | 5.07±1.19 | 5.07±1.19 | 4.6±1.05 | ＜0.001 |
| Triglycerides (mmol/L) | 1.5±0.94 | 1.5±0.94 | 1.49±0.85 | 0.880 |
| Waist Circumference (cm) | 84.99±8.31 | 84.98±8.31 | 87.85±7.76 | 0.002 |
| Weight (kg) | 66.17±10.81 | 66.16±10.81 | 67.12±9.87 | 0.416 |
| Waist-hip Ratio (cm/cm) | 0.9±0.27 | 0.9±0.27 | 0.9±0.06 | 0.684 |
| Alcohol Frequency，n(%) |  |  |  | 0.113 |
| Never | 14348(87.46) | 14291(87.49) | 57(79.17) |  |
| Occasional | 1636(9.97) | 1624(9.94) | 12(16.66) |  |
| Daily | 422(2.57) | 419(2.57) | 3(4.17) |  |
| Exercise Frequency，n(%) |  |  |  | 0.044 |
| Never | 2441(14.88) | 2431(14.88) | 10(13.89) |  |
| Occasional | 5466(33.32) | 5429(33.24) | 37(51.39) |  |
| Daily | 8499(51.80) | 8474(51.88) | 25(34.72) |  |
| Exercise Duration (min) | 28.05±21.32 | 28.04±21.33 | 30.56±17.51 | 0.229 |
| Dietary Habits，n(%) |  |  |  | 0.942 |
| Unhealthy | 2004(12.22) | 1995(12.21) | 9(12.5) |  |
| Healthy | 14402(87.78) | 14339(87.79) | 63(87.5) |  |
| Daily Cigarette Consumption | 0.75±2.98 | 0.75±2.98 | 1.35±3.17 | 0.115 |
| Sleep Quality，n(%) |  |  |  | 0.194 |
| Normal | 12987(79.16) | 12935(79.19) | 52(72.22) |  |
| Disordered | 3419(20.84) | 3399(20.81) | 20(27.78) |  |
| Depression Screening，n(%) |  |  |  | *NA** |
| Negative | 16406(100) | 16344(100) | 72100) |  |
| Positive | 0(0) | 0(0) | 0(0) |  |
| Emotional Status，n(%) |  |  |  | *NA** |
| Normal | 16406(100) | 16344(100) | 72(100) |  |
| Abnormal | 0(0) | 0(0) | 0(0) |  |
| ***：Since no samples tested positive in the initial screening, the p-value is nonsignificant and recorded as *NA*. | | | | |
