# Supplementary material for: Development and Validation of a Machine Learning-Based Risk Prediction Model for Ischemic Stroke-Diabetes Comorbidity
Source: Research Square preprint supplement (doi:10.21203/rs.3.rs-8265041/v1), 2025-12-23
Supplement: Supplementary file 2 [file 89bfbc7227408c11fe015c03.xlsx]

## Sheet: Sheet 1
GENDER	AGE	EDUCATION_LEVEL	PROFESSION_TYPE	MARITAL_STATUS	SL_SITUATION	HIS_STROKE	HIS_DIABETES	EXAM_EX_TIME	HEIGHT	WEIGHT	WAISTLINE	HIPLINE	WHR	EXAM_OLD_COGNIVITE	EXAM_OLD_EMOTION	EXAM_OLD_DEPRESSION	EXAM_EX_CYCLE	EXAM_FOOD_HABIT	EXAM_SM_COUNT	EXAM_DK_CYCLE	BMI	SBP	DBP	BLOOD_HEMOGLOBIN	BLOOD_WHITE_CELL	BLOOD_PLATELET	FBG	GHBAIC	SGPT	SGOT	ALBUMIN	TBIL	DBIL	SERUM_CREATININE	BUN	K_CONSISTENCE	NA_CONSISTENCE	TC	TRIG	LDL	HDL	CO
0	67	2	1	0	0	0	0	30	150.1	37.2	66	84	0.83	0	0	0	2	1	0	0	16.51	118.5	69	123	6.18	193	5	6.3	14	17	43.5	8.75	1.4	54	3.3	3.73	139.8	3.11	0.53	1.92	0.83	0
1	64	2	1	0	0	0	0	0	167.1	68.6	79	93	0.8	0	0	0	0	1	20	1	24.57	121.5	79.5	166	9.18	276	5.65	6.2	30	17	47.1	2.99	1	76.7	6.25	4.82	139	6.51	1.81	4.98	0.89	0
0	70	3	1	0	0	0	0	0	172	48.8	66	85	0.77	0	0	0	0	1	0	0	16.5	110	57	105	6.83	357	4.98	5.9	8	13	48.8	5.88	3.34	46.4	4.39	4.73	133	3.4	0.47	1.99	1.02	0
0	68	3	1	0	0	0	0	0	178	69.4	75	99	0.79	0	0	0	0	1	0	0	21.9	116.5	62	124	6.16	270	5.76	6.1	13	13	45.7	3.37	1.33	57	7.74	4.3	139	3.76	1.48	2.29	0.95	0
0	59	3	0	0	0	0	0	0	158	56.6	72	96	0.75	0	0	0	0	1	0	0	22.67	109	57.5	117	9.92	273	4.88	5.4	20	19	43.9	12.16	3.58	48	3.96	4.2	134.5	4.09	0.43	2.65	1.2	0
1	64	2	1	0	0	0	0	30	182.1	81.7	87	103	0.84	0	0	0	2	1	10	1	24.64	127.5	66.5	157	6.92	318	5.59	6.6	57	28	46.1	5.58	1.7	65.8	5.88	4.76	138.6	3.6	1.64	1.75	1.39	0
1	62	3	0	1	1	0	0	30	172	80	80	86	0.9	0	0	0	2	1	0	0	27.04	115	69	120	5.3	210	6.3	6.5	20	20	42	8.3	5.3	55	7.2	4.1	120	3.4	1.7	2.3	1.7	0
0	69	3	1	0	0	0	0	30	170	68.9	86	96	0.89	0	0	0	1	1	0	0	23.835	123	73	132	5.7	223	5.6	6	20	19	44.5	11.95	2.67	74.2	4.74	3.68	140.9	4.06	1.08	2.43	0.91	0
1	67	3	1	0	0	0	0	60	183	85	80	102	0.78	0	0	0	2	1	0	0	25.38	126	71.5	137	7.73	279	5.8	5.4	20	16	44.3	8.3	1.32	100	6.13	4.23	137.7	4.54	0.65	3.4	1.06	0
0	66	3	1	0	0	0	0	0	163	65	80	90	0.88	0	0	0	0	1	0	0	24.46	129	70.5	138	5.25	242	6.1	6.2	12	18	47.8	10.8	2.8	51	6.51	4	137	3.31	1.28	1.55	1.21	0
1	62	3	0	1	0	0	0	30	180	80.55	95	103	1	0	0	0	2	1	5	1	38.88	121.5	76.5	144	5.69	265	5.6	5.5	11.06	15	49.8	8.7	1.2	69	4.01	4.45	141	5.17	2.03	3.41	0.9	0
1	76	3	1	0	0	0	0	30	172	76.1	96	104	0.92	0	0	0	2	1	5	1	33.8	130	73.5	140	6.77	201	5.7	5.7	9	16.89	47	18.82	5.08	54	4.16	4.98	139.7	6.46	1.17	4.38	1.66	0
1	53	3	0	1	0	0	0	30	179.4	86.6	90	108	0.83	0	0	0	2	1	0	1	26.91	121.5	70	135	4.65	231	5.18	5.5	29	24	43.5	5.42	1.7	87.1	5.96	4.35	141	4.35	1.2	2.85	0.78	0
1	74	3	1	0	0	0	0	30	170	73.3	86	94	0.91	0	0	0	1	1	0	0	25.36	124.5	73	143	6.55	210	5.3	6.1	16	21.85	47.5	11	2.4	77	5.59	4.24	137.3	4.12	0.4	2.72	1.67	0
0	70	3	1	1	0	0	0	30	160	70	76	86	0.88	0	0	0	2	1	0	0	27.34	129.5	71	132	6.02	260	5.7	7.3	33	25	46.5	9.61	1.57	64.2	5.59	3.7	140.1	5.5	1.06	3.43	1.67	0
1	73	3	0	1	0	0	0	30	185	74.65	86	96	0.93	0	0	0	2	1	0	0	30.97	125	74.5	147	7.39	122	5.9	5.5	49	39	47.9	12.27	1.33	96.6	4.77	4.98	138.9	4.03	1.3	2.21	0.86	0
0	61	3	1	0	0	0	0	30	162	82.6	86	96	0.9	0	0	0	2	1	0	0	31.47	124.5	67	143	3.43	202	5.2	5.9	35	35	48.5	18.69	2.63	60.7	5.6	4.38	138.9	3.7	1.23	1.93	1.21	0
1	54	3	1	1	0	0	0	0	184	73	99	106	0.93	0	0	0	0	1	0	0	32.49	129.5	77.5	140	8.79	157	5.7	5.5	18	21	44.7	14.62	1.73	200.9	9.34	4.45	141	4.54	1.92	2.98	0.97	0
1	67	3	1	1	0	0	0	30	172	84.7	100	105	0.95	0	0	0	2	1	0	0	28.63	120.5	79.5	139	7.38	250	5.8	6.4	20	21	49.8	13.08	2.1	100	5.95	4.31	133	5.43	4.69	2.49	0.96	0
1	62	3	1	0	0	0	0	30	178	95	98	112	0.87	0	0	0	2	1	0	0	29.98	125	76.5	135	5.16	171	5.4	5.5	23	20	45.8	13.4	5.76	80.8	6.07	3.93	130.4	5.01	0.7	3.3	1.4	0
1	67	3	1	1	0	0	0	0	170	70	74	86	0.86	0	0	0	0	1	0	0	24.22	112.5	69	147	6.02	183	5.7	5.4	21	28	47.2	13.2	3.16	103	8.36	4.46	135.6	5.53	0.58	3.75	1.33	0
0	68	3	0	1	0	0	0	30	170	79	85	95	0.89	0	0	0	2	1	0	0	27.33	124.5	75.5	142	6.28	250	5.1	6.1	69	49.67	46.7	14.2	1.4	38.6	4.95	3.47	140.6	4.29	2.07	2.14	1.01	0
1	66	2	1	1	0	0	0	30	180	79.8	92	105	0.9	0	0	0	1	1	0	0	40.43	133.5	76	131	8.18	192	6.4	5.9	8	17	51.3	10.11	1.8	79	5.48	4.98	142.4	2.19	2.25	0.88	0.96	0
0	83	2	1	1	0	0	0	0	150	64	79	89	0.88	0	0	0	0	1	0	0	28.44	120.5	71.5	127	9.36	241	5.9	6.3	12	19.6	37	8.5	3.14	94.93	11.95	4.82	141.3	4.94	1.66	3.01	1.33	0
1	82	2	1	1	0	0	0	20	172	84.3	92	103	0.89	0	0	0	1	1	2	1	28.49	125	73	141	7.34	169	5.6	7.2	26	26	43.64	20.68	10.11	119.3	9.9	4.82	140.4	3.04	0.96	0.96	1.73	0
1	45	3	0	1	0	0	0	0	178	76	80	90	0.88	0	0	0	0	1	0	0	23.98	127.5	78	146	7.84	200	5.8	6.1	21	18	47.9	7.5	1.2	89.1	6.25	4.07	133.3	4.72	2.03	2.25	1.28	0
1	69	3	1	1	0	0	0	30	165	84	90	102	0.88	0	0	0	2	1	0	0	30.85	125	76	150	4.44	48	5.7	5.8	39	38	46.3	23.68	7.18	77	4.62	4.11	139.5	3.56	0.96	1.82	1.44	0
1	66	2	0	1	0	0	0	0	171	70.2	84	100	0.84	0	0	0	0	1	0	0	24.01	111.5	69	142	5.37	283	5.4	6	7	20	43	5.49	2	73.6	4.74	4.58	138.1	4.24	1.01	2.63	1.12	0
1	52	3	1	1	0	0	0	30	178	81.2	86	96	0.89	0	0	0	2	1	0	0	25.62	123.5	76	152	3.93	195	5.5	6.5	17	12	48.2	18.84	3.86	63	5.36	4.06	137.7	4.38	1.15	2.45	1.54	0
1	59	3	1	1	0	0	0	30	170	87.6	94	103	0.91	0	0	0	1	1	0	0	30.31	123	74	147	5.6	147	5.6	5.4	28	21	46.5	15.11	2.39	80	4.87	3.82	143	3	1.04	1.79	0.9	0
1	62	2	1	1	0	0	0	60	170	70.3	102	105	0.97	0	0	0	2	1	0	0	36.33	125.5	77.5	143	5.8	185	5.4	5.9	23	30	44.7	24.9	3.22	82.5	6.01	4.83	138.9	4.97	1.33	3.34	0.97	0
1	84	3	1	1	0	0	0	30	160	54.3	70	84	0.83	0	0	0	1	1	0	0	21.21	126.5	75.5	141	8.21	241	5.6	6.3	11	16	40.8	9.87	3.14	68	4.97	4.32	138.5	6.78	3.23	4.41	1.5	0
1	55	2	0	1	0	0	0	40	184	76.6	86	97	0.89	0	0	0	1	1	0	0	22.62	126	75	154	6.62	174	5.6	5.4	14	16	44.7	14.32	2.8	60.1	4.93	3.96	143	3.03	0.74	1.31	1.47	0
0	57	3	1	0	0	0	0	30	168	53.2	71	84	0.85	0	0	0	1	1	0	0	18.84	122.5	76.5	125	5.73	315	6.3	7	22	25	46.3	7.7	1.1	72.3	5.82	4.46	140.7	7.25	0.86	1.8	1.66	0
1	70	2	1	1	0	0	0	30	178	95.5	96	110	0.87	0	0	0	1	1	0	1	30.14	124	73.5	160	4.46	126	5.6	5.9	17	18	43.2	26.24	4.4	77	5.3	4.07	141	6.92	1.17	4.22	1.7	0
0	69	3	1	1	1	0	0	30	160	69.5	88	98	0.9	0	0	0	2	1	0	0	27.14	129.5	77.5	138	4.56	192	5.3	5.7	15	17	42.1	12.46	1.64	61.1	3.71	3.73	140.6	5.28	1.39	3.27	1.36	0
1	73	3	1	1	0	0	0	30	178	68.8	84	97	0.87	0	0	0	1	1	0	0	21.71	126.5	77	149	6.67	165	5.2	5.4	18	15	46.72	22.39	4.72	93	6.85	4.24	140	4.84	0.67	3.58	1.42	0
1	65	3	1	1	0	0	0	30	178	68.3	83	97	0.86	0	0	0	1	1	0	0	21.55	125.5	72.5	154	6.36	146	5.6	5.6	17	31	46.3	31.11	6.61	84.5	6.48	4.76	130.3	4.43	0.99	2.76	1.57	0
0	68	2	0	1	0	0	0	30	162	59.05	78	95	0.82	0	0	0	1	1	0	0	22.5	125	74.75	131	5.93	325	5.9	6.1	18	26	45.26	10.87	1.6	74.9	5.24	4.33	137.5	7.15	2.22	4.94	1.23	0
1	86	3	1	1	0	0	0	20	174	88.7	100	105	0.95	0	0	0	1	1	0	0	35.53	127	76	138	6.53	156	6.2	5.9	19	25	48.7	18.63	3.05	108	5.29	4.45	140.4	3.68	1.75	2.31	1.14	0
1	70	3	1	1	0	0	0	30	162	80.3	93	104	0.89	0	0	0	1	1	0	0	30.59	127.5	69	123	5.18	162	5.6	6.2	16.18	22	44	14.09	3.12	93.3	7.14	3.8	139.4	5	1.3	3.28	0.95	0
1	64	3	1	1	0	0	0	30	183	69.8	83	94	0.88	0	0	0	1	1	0	0	20.84	123.5	73.5	142	6.01	171	5.3	5.2	14	16	45.2	8.2	1.01	67	5.3	4.16	143.8	5.36	1.28	3.7	1.47	0
1	73	3	1	1	1	0	0	30	175	82.8	86	116	0.74	0	0	0	1	1	0	0	27.03	125.5	76.5	139	6.15	289	5.8	6.1	8	16	43	8.66	2.71	102.4	8.53	4.3	135.5	5.52	1.83	3.13	1.33	0
0	71	3	1	1	0	0	0	30	160	65	80	90	0.88	0	0	0	2	1	0	0	25.39	116.5	75.5	127	4.44	257	5.7	5.9	26	27	43.3	12.27	2.1	84.5	5.13	4.46	140	6.37	0.88	5.19	1.21	0
1	40	3	0	1	0	0	0	0	184	74.2	82	94	0.87	0	0	0	0	1	3	0	21.91	123.5	73.5	157	5.45	213	5.4	5.6	20	23	47.9	8.6	1.63	73	6.37	4.76	136.5	6.96	6.05	3.22	1.06	0
1	66	3	1	1	0	0	0	0	171	85	90	96	0.93	0	0	0	0	0	5	0	29.06	125.5	70.5	152	5.68	196	5.9	6.2	22	19.6	46.5	13.17	5.51	66	6.5	4.4	139.3	4.01	0.99	2.34	1.2	0
1	65	2	0	1	0	0	0	0	180	84.6	93	95	0.98	0	0	0	0	1	5	0	31.29	126.5	73.5	140	6.05	177	5.7	5.8	23	20	47	14.9	2.2	61.3	5.62	4.82	138.4	4.44	1.31	2.8	0.95	0
1	65	2	1	1	0	0	0	60	172	96.4	95	98	0.97	0	0	0	2	1	0	1	32.58	133.5	82	150	4.99	169	5.8	6.1	27	28	45.3	19.37	3.6	68.8	5.53	4.55	142.5	4.96	1.3	3.14	1.18	0
0	47	2	1	0	1	0	0	60	165	68	86	96	0.89	0	0	0	2	1	0	0	24.97	123	70	141	4.42	319	6.1	6.6	43	36	51.3	9.8	1.8	46	4.35	4.35	139.3	4.16	1.73	2.18	1.44	0
1	64	3	1	1	0	0	0	30	160	54.1	75	83	0.9	0	0	0	1	1	0	0	21.13	124.5	73.5	158	4.72	186	5.8	5.9	34	36	47.8	21.44	5.41	75.4	7.56	4.65	139.3	4.11	0.82	2.36	1.55	0
0	63	3	1	1	0	0	0	0	159	60	88	96	0.91	0	0	0	0	1	0	0	23.73	120.5	77.5	148	4.77	228	5.7	6.2	43	35	45.7	14.3	4.42	60	5.63	4.07	139	4.79	1.82	2.76	1.35	0
1	67	3	1	1	0	0	0	30	173	80.2	92	100	0.92	0	0	0	2	1	5	1	26.79	120.5	79	151	5.97	169	5.8	5.4	41	31	44.7	15.45	2.6	62.3	4.61	4	140.3	4.45	0.9	3.3	1.25	0
1	69	2	1	1	1	0	0	30	174	72.6	77	82	0.94	0	0	0	1	1	0	0	23.97	126.5	76.5	141	4.38	165	5.6	7.3	37	23.41	48.7	31.3	10.11	82.5	4.72	4	140.8	2.73	0.62	1.64	1.2	0
1	63	2	0	0	0	0	0	30	183	82.3	92	96	0.95	0	0	0	1	1	0	0	24.57	123.5	73	149	4.32	213	5.3	6.2	18	20	46.4	25.7	7.1	75	6.75	4.39	137.7	3.79	0.88	2.18	1.16	0
0	65	3	1	0	0	0	0	30	155	90	89	96	0.92	0	0	0	2	1	0	1	37.46	124.5	75	142	4.81	342	5.8	6.5	22	21.13	47.34	10.2	1.54	66.9	4.85	4.86	141	7.34	1.39	4.99	1.9	0
1	63	3	1	1	0	0	0	30	171	70	85	100	0.85	0	0	0	1	1	0	1	23.93	120.5	79	157	4.06	231	5.6	5.5	37	28	44.5	9.1	1.7	59.6	5.61	4.75	141.6	4.42	1.09	3.06	0.95	0
0	71	3	1	1	0	0	0	30	166	75	92	103	0.89	0	0	0	2	1	0	0	27.21	125	76	127	6.26	147	5.7	5.9	11.37	17	46.4	8	1.42	80	5.78	4.71	142.1	4.76	0.94	2.41	1.64	0
0	67	2	1	1	0	0	0	30	168	65.5	77	84	0.92	0	0	0	1	1	0	0	23.2	127	75	131	6.98	296	5.4	6.5	17	20	47.2	7.13	2.2	58	6.28	3.88	139	5.86	3.03	3.61	1.11	0
1	55	3	1	1	0	0	0	20	180	85.6	96	108	0.88	0	0	0	2	1	20	2	26.41	125	74	186	5.65	253	6.2	6.2	19	24	48.4	15.48	3.3	67	4.3	4.43	139	4.6	1.71	2.43	1.48	0
0	67	3	1	0	0	0	0	30	166	79	80	99	0.8	0	0	0	1	1	0	0	28.66	124.5	75.5	132	6.28	197	5.8	5.7	24	19	44.6	8.82	2.1	49	5.48	4.15	139.7	3.67	0.89	1.99	1.3	0
1	61	2	0	1	0	0	0	0	163	66.4	85	92	0.92	0	0	0	1	1	0	0	24.99	111	67.5	150	8.16	221	5.28	6.2	27	23	46.9	6.34	1.26	89.4	6.29	3.63	140	5.44	1.7	3.36	1.22	0
0	45	3	0	1	0	0	0	0	162	75	80	90	0.88	0	0	0	0	1	0	0	28.57	111	70.5	144	5.52	350	5.6	6.4	23	19.72	47.2	7.1	1.2	40.7	5.32	4.75	143.8	6.04	1.62	4.52	1.11	0
0	65	3	1	1	0	0	0	60	158	56	80	90	0.88	0	0	0	1	1	0	0	22.43	126	77.5	136	7.79	350	7.81	6.1	18	23	49.1	5.2	1.7	57.1	4.9	4.24	135.9	5.61	2.37	3.53	1.07	0
0	47	3	1	1	0	0	0	30	160	67.45	83.5	94	0.885	0	0	0	2	0	0	0	26.345	118.5	75.75	138	6.25	174	5.9	6.6	15	15	46	7.64	1.1	54.3	6.04	3.72	139.6	4.29	4.85	1.6	0.87	0
0	60	3	1	1	0	0	0	0	165	56	67	92	0.72	0	0	0	0	1	0	0	20.56	120.5	79	107	6.86	190	5.7	6.1	12	22	43.1	10.4	2	76	8.03	3.99	138	3.78	0.69	2.13	1.26	0
1	81	3	1	1	0	0	0	30	168	64.5	78	92	0.84	0	0	0	1	1	0	0	22.85	120.5	79.5	134	6.13	172	5.9	5.5	7	38	42.2	33.2	19.44	96	6.53	4.45	137.2	3.71	0.68	1.65	2.04	0
1	72	2	1	0	0	0	0	30	172	67	84	98	0.85	0	0	0	2	1	0	0	22.64	125.5	71	153	6.25	190	5.7	6.4	26	25	45.4	10.32	2	92	9.09	4.78	138	4.97	1.03	3.81	1.13	0
1	45	3	0	1	0	0	0	20	169	87.6	103	112	0.92	0	0	0	1	1	10	0	30.67	124	75	159	8.31	201	5.5	6.7	49	21	48.36	11	0.8	59	5.23	4.3	140	4.86	1.59	3.5	1.31	0
0	51	3	1	0	0	0	1	35	164	80.8	100.5	110	0.875	0	0	0	1	1	0	0	30.035	133.25	74	146	6.04	327	6.7	7.1	33	21	46.5	6.63	1.4	46	4.85	4.72	139	6.89	1.92	5.15	1.19	0
1	62	3	1	1	0	0	0	0	173	85.4	100	110	1.05	0	0	0	0	0	0	0	36.75	128.5	72.5	145	7.18	206	6	6.2	18	19	49.8	8.92	1.2	77	4.44	4.45	140	5.32	1.9	3.49	0.86	0
1	72	2	0	1	0	0	0	0	180	85.5	85	98	0.88	0	0	0	0	1	0	0	26.38	126	76.5	137	6.72	187	5.4	5.4	16	18	48.2	12.95	2.8	79.8	5.26	4.47	139.3	4.5	0.63	2.71	1.36	0
1	40	2	1	0	0	0	0	30	170	81	100	100	0.94	0	0	0	2	1	10	0	31.24	125	73.5	171	5.74	229	5.3	6.5	36	21.81	51.3	12.94	2.01	62	5.31	4.26	138	3.55	1.16	1.45	1.12	0
1	68	3	1	1	0	0	0	30	181	89.55	97	106	0.92	0	0	0	1	1	0	0	30.67	124.5	74.5	147	5.48	199	5.4	6	32	25	49.9	38.9	19.44	116	4.22	4.98	139.4	2.72	1.31	2.3	1	0
1	68	3	0	1	0	0	0	30	176	94.6	95	105	0.9	0	0	0	1	1	0	0	28.18	126.5	72.5	130	7.03	154	5.3	6	16.2	18	44	8.5	2.39	103.9	9.35	3.53	139.5	3.56	2.12	1.21	1.13	0
1	65	3	1	0	0	0	0	30	175	75	84	97	0.85	0	0	0	2	1	0	0	23.34	120.5	79.5	160	4.38	162	5.8	5.5	30	24	44.5	14.97	2.75	87.5	4.66	3.69	138.9	6.29	1.77	4.13	1.55	0
1	68	2	1	1	0	0	0	0	170	95	115	122	0.94	0	0	0	0	1	0	0	32.865	131.25	76.75	143	6.88	204	5.7	6.3	22	21	45.8	17.7	3.11	112	5.62	3.9	139	3.48	1.56	2.12	0.8	0
0	69	2	1	1	1	0	0	50	163	62	78	99	0.78	0	0	0	1	0	0	0	26.075	124.25	73	127	5.98	215	5.7	6.7	12	16	49.8	6.5	1.8	55	5.46	4.66	138.2	4.31	1.73	2.61	0.85	0
1	60	3	0	1	0	0	1	20	173	85.4	92	97	0.95	0	0	0	1	1	0	0	28.53	125.5	75	150	5.36	270	6.2	6.33	23	17	44.2	5.5	1.4	64.6	3.75	4.46	140	5.15	2.42	3.68	1.14	0
0	60	3	1	1	0	0	0	40	165	86.7	88	101	0.87	0	0	0	1	1	0	0	28.5	122.5	75.5	139	7.03	183	5.3	6.1	38	29	44.9	12.82	3.48	45.3	4.59	4.21	145	5.08	1.37	3.52	1.13	0
0	66	3	1	0	0	0	0	0	154	56.3	79	90	0.87	0	0	0	0	1	0	0	23.73	121	77.5	138	5.48	170	5.9	6.2	14	20	47.1	12.08	3.53	46	7.19	4.42	138.7	3.4	1.33	1.83	1.21	0
0	64	3	0	1	0	0	0	50	169	76.5	92	105	0.87	0	0	0	1	1	0	0	26.305	126	77.25	144	5.86	250	5.9	5.8	43	29	53.1	13.7	2.33	62.1	3.02	3.95	137.9	3.48	1.83	1.8	1.01	0
1	71	3	1	0	0	0	0	0	178	95.7	103	113	0.91	0	0	0	2	1	0	0	32.98	126.5	82.5	159	4.93	143	5.4	5.6	17	15	47.4	14.82	3	71	5.27	3.93	135.5	3.74	1.1	2.04	0.97	0
1	72	2	1	1	0	0	0	30	170	82.1	92	105	0.88	0	0	0	1	1	0	0	28.4	127	73.5	145	5.33	181	5.3	6.4	35	29	42	11.5	2.1	91.4	3.95	4.13	140.7	3.8	1.51	2.41	0.76	0
1	50	3	1	0	0	0	0	30	173	90.1	101.5	110	0.92	0	0	0	2	1	0	0	29.4	129	82.5	153	9.71	317	5.2	5.6	59	43	49.1	16.9	2.1	50.7	6.37	3.69	130.3	5.27	1.67	3.78	0.95	0
1	70	3	1	0	1	0	0	20	170	67.75	86	103	0.83	0	0	0	1	0	5	0	23.44	123	72.75	143	6.97	205	5.5	6	21	28	43.27	10.77	2.9	79	6.26	4.46	139	9.39	9.4	4.47	0.81	0
0	69	2	1	1	0	0	0	0	160	65.45	85	90	0.94	0	0	0	0	1	0	0	24.64	125.5	77.5	117	6.61	243	5.6	6.3	23	17	45.4	10.9	1.71	47.4	2.84	3.72	137.5	4.37	0.84	2.95	1.5	0
1	60	3	1	1	0	0	0	30	174	83.9	82.5	97	0.85	0	0	0	1	1	0	0	27.705	127	79.5	139	8.04	198	5.9	6.3	3	13	49.2	20.15	3.87	66.6	4.88	3.73	136.5	4.14	0.64	2.54	1.63	0
0	68	2	1	0	0	0	0	30	160	47.95	70	76	0.92	0	0	0	1	1	0	0	18.725	133	81.25	134	4.7	165	5.9	6.2	27	26	50	14.44	2.42	82.6	6.39	3.7	139	4.02	0.57	2.32	1.33	0
0	70	3	0	0	0	0	0	30	165	59.4	74	90	0.82	0	0	0	2	1	0	0	21.81	125.75	78.75	126	6	126	5.3	5.4	13	16	45.9	12.6	4.42	60	4.54	3.99	138.9	3.81	1	1.91	1.74	0
1	53	3	0	1	0	0	0	30	179	98.5	82	96	0.85	0	0	0	0	1	0	0	27.28	121.5	77.5	153	5.57	225	5.8	6	28.97	27	45.3	10.2	2.4	65	4.51	3.53	140.7	5.72	1.09	4.01	1.16	0
1	69	2	1	1	0	0	0	0	176	82.2	86	97	0.89	0	0	0	0	1	10	1	26.53	127	71	136	7.09	178	5.3	5.9	12	19	42.7	13.48	4.26	68	4.8	4.37	140.6	4.93	1.38	2.69	1.33	0
0	70	3	1	1	0	0	0	0	155	50	68	78	0.87	0	0	0	2	1	0	0	20.81	126.5	76.5	123	6.04	196	5.4	6.1	13.16	36	43.5	8.2	3	43.4	6.01	3.8	140.4	5.94	1.42	4.01	1.45	0
0	69	3	1	1	1	0	0	30	162	54.3	75	81	0.92	0	0	0	2	1	0	0	20.69	123	74.5	138	5.89	165	5.3	5.9	19	27	48.1	11.8	7.3	83	4.41	3.99	140.2	5.15	1.76	2.72	1.85	0
1	63	3	1	1	0	0	0	30	178	71.6	82	93	0.88	0	0	0	2	0	2	0	22.59	125	75.5	148	7.86	203	5.2	5.9	62	39.38	51	19.45	2.7	47.3	6.01	4.38	137	4.1	1.86	2.05	1.24	0
0	71	2	0	1	0	0	0	30	164	51.7	70	79	0.89	0	0	0	1	1	0	0	19.22	129	72	126	5.91	180	6.2	6.6	39	28	48.6	12.51	2.19	89	8.09	4.58	137.5	5.08	1.12	3.81	1.24	0
0	64	2	1	1	0	0	0	0	158	50.3	70	80	0.87	0	0	0	1	1	0	0	20.14	119	77	127	2.48	166	5.3	6.1	13	23	46.6	11	2.17	56.71	5.53	3.83	139.4	5.04	0.98	2.82	1.79	0
1	40	2	1	1	0	0	0	0	182	98.8	93	97	0.95	0	0	0	2	1	0	1	29.82	121	74	145	5.45	203	5.3	5.7	23	23	49.2	8.1	1.49	82.8	3.98	3.94	142.8	5.33	1.24	3.5	1.19	0
1	40	3	1	1	0	0	0	30	171	89	86	106	0.81	0	0	0	2	1	5	0	30.43	125.5	74	175	6.58	211	5.8	6.9	69	34	47.9	18.4	4.72	57.4	3.4	3.94	139.7	3.73	1.13	2.18	1.21	0
1	40	3	0	1	0	0	0	40	178	91.7	100	112	0.89	0	0	0	1	1	0	0	32.98	121.5	75.5	157	6.15	288	5.4	5.5	15	15	51.3	9	1.7	77	7.49	4.86	141.9	4.48	1.42	3.64	0.81	0
1	40	3	1	1	0	0	0	30	178	95	86	100	0.86	0	0	0	2	1	0	0	29.98	128.5	75.5	157	6.29	239	5.9	5.9	21.56	17	51.3	7	0.9	59	5.23	3.53	137.6	4.69	1.75	2.78	1.23	0
0	40	2	1	1	0	0	0	30	167	63.6	77	84	0.92	0	0	0	1	1	0	0	22.8	126.5	73.5	145	5.86	391	5.4	6.4	25	20	44.7	9.17	1.4	59	6.56	4.66	141.6	7.88	3.37	5.25	1.42	0
1	40	3	0	1	0	0	0	0	175	70	86	95	0.9	0	0	0	0	1	0	0	22.85	129	72.5	149	5.58	212	5.8	5.7	14	17	51.3	15.2	2.5	60	5.6	3.65	133.1	4.15	1.41	2.37	1.51	0
0	40	3	1	1	0	0	1	30	170	66.5	78	96	0.91	0	0	0	1	1	0	0	23.01	122.5	73	140	5.05	240	6	6.3	27.36	24	49.8	10.75	1.63	67.6	4.63	4	138.8	6.01	1.88	3.83	1.52	0
1	40	3	1	0	0	0	0	0	185	95.6	103	110	0.93	0	0	0	0	1	0	0	30.29	123	74.5	155	7.01	205	5.6	5.4	23	18	44.7	10.12	1.24	67	6.56	4.23	138.8	6.5	3.58	4.1	1.15	0
1	40	3	1	1	0	0	0	30	183	94.8	103	100	0.9	0	0	0	1	1	0	0	32.01	124.5	74.5	140	7.31	273	6	6.8	68	38	51.3	15.1	1.4	108.3	10.47	4.55	142	3.92	2.09	2.23	1	0
1	40	3	1	1	0	0	1	30	183	72.4	83	94	0.88	0	0	0	2	1	0	0	21.61	124	76.5	160	5.67	172	5.3	5.8	32	21	47.9	14.32	1.1	66	4.63	4	138.8	5.8	1.96	4.07	1.19	0
0	40	3	1	1	0	0	0	30	160	54.3	72	84.5	0.79	0	0	0	2	1	0	0	21.21	123	78	145	8.06	261	6.4	5.6	18	18	47.9	9.77	1.01	49.6	3.78	4.21	138.6	4.25	3.13	1.83	1.44	0
1	40	2	1	1	0	0	0	30	172	80	85	103	0.87	0	0	0	1	1	10	1	27.04	125.5	72.5	156	6.39	217	5.6	6	67.28	52	47.7	13	2.2	71.2	6.37	4.7	140.2	6.1	2.07	4.9	0.99	0
0	40	3	1	1	1	0	0	30	162	60.9	76	90	0.86	0	0	0	1	0	0	0	23.2	120.5	75.25	143	7.85	259	5.8	6.2	11	16	49.8	8.9	1.1	52.3	5.21	4.35	138	4.82	0.83	2.37	1.58	0
0	40	2	1	1	0	0	0	30	158	83.3	93	96	0.94	0	0	0	2	1	0	0	33.36	124	73.5	141	5.34	231	5.2	6.3	64	36	48.36	20.88	2.6	36	5.32	4.08	141.5	3.71	1.17	1.76	1.42	0
1	40	2	1	0	0	0	0	30	170	50	76	85	0.89	0	0	0	2	1	0	0	17.3	120.5	71	136	4.89	229	5.6	6	29	25	49.7	8.04	1.7	78.2	3.04	4.09	139.3	5.69	1.28	3.77	1.72	0
0	40	3	1	1	0	0	0	50	154	65	86	95	0.9	0	0	0	1	1	0	0	27.4	125	76.5	167	9.43	212	6.01	5.7	30	16	47.9	17.4	1.8	72	8.31	4.51	142.4	5.8	2.25	3.7	1.1	0
1	40	2	0	1	0	0	0	0	171	79	88	88	0.91	0	0	0	0	1	0	0	27.01	122.5	77.5	154	7.43	227	5.8	5.8	69	31	45.2	16.8	1.56	63	5.56	4.35	140	5.81	2.22	3.66	1.1	0
1	40	3	1	1	0	0	0	30	183	95.6	110	120	0.91	0	0	0	1	1	0	0	32.93	121.5	66.5	174	5.51	291	5.6	6.4	34.58	20	47.9	10.1	1.7	89	3.09	4.33	141.9	3.65	1.97	2.11	0.71	0
1	40	3	1	1	0	0	0	30	181	80	90	100	0.9	0	0	0	2	1	0	0	24.41	129	79.5	160	7.78	187	5.8	6.5	23	17	44.7	14.98	2.2	46.54	5.77	3.94	139.7	5.12	2.11	3.85	0.79	0
0	40	3	1	1	1	0	1	30	160	57.9	80.5	90	0.895	0	0	0	2	0	0	0	22.615	132	72.75	137	5.56	297	5.9	5.8	12	17	46	9.36	1.2	70.9	4.71	4.07	137.3	5.35	1.06	2.96	2.75	0
1	40	2	0	1	0	0	0	30	175	90	95	105	0.9	0	0	0	1	1	2	1	29.38	118.5	69.5	175	5.87	260	5.8	6.9	18	21	47.9	33.2	8.97	59	7.14	4.37	139	3.61	1.66	2.55	1.12	0
0	40	2	1	1	0	0	0	30	165	67	83	98	0.84	0	0	0	2	1	0	0	24.6	129	75	129	5.76	326	5.8	6.5	23	22	48.4	16.43	2.26	45	3.78	4.25	139.8	5.81	1.47	4.11	1.47	0
1	40	2	1	1	0	0	0	30	173	81	88	96	0.91	0	0	0	2	1	0	0	27.06	125	75.5	145	5.23	171	5.7	5.9	23	19	48.36	14.8	1.43	96.2	5.42	4.37	139	4.78	0.73	3.25	1.28	0
0	40	3	1	1	0	0	0	0	165	82	88	96	0.91	0	0	0	0	1	0	0	30.11	125.5	76	139	4.14	363	5.8	5.8	48	23	46.6	7.8	1.4	58.2	5.32	4.56	140.7	3.94	2.69	1.83	1.43	0
1	40	2	0	0	0	0	0	30	170	71.9	85	100	0.85	0	0	0	1	1	10	1	24.875	125.5	73.75	161	4.5	300	5.7	5.6	11	23	49	6.9	1.43	63.8	5.32	5.07	134.5	5.3	0.58	3.4	1.69	0
0	40	3	0	1	0	0	0	30	162	58	68	90	0.75	0	0	0	2	1	0	0	22.1	120.5	61.5	137	5.77	308	5.7	5.4	19.99	23	48.4	7.5	1.4	69.4	5.32	4.24	138.6	5.69	0.92	3.21	2.12	0
1	40	3	1	1	0	0	0	30	172	72.6	78	88	0.89	0	0	0	1	0	0	1	24.54	131.5	77.5	147	5.41	263	5.8	6.1	35	28	51.3	72.23	10.11	73.2	5.31	4.47	140	4.79	1.46	2.64	1.37	0
0	40	3	1	1	0	0	0	30	160	65	90	105	0.85	0	0	0	2	1	0	0	25.39	120.5	77.5	152	4.08	286	5.7	5.7	16	17	49.8	13.74	2.39	73	4.01	4.33	139	7	2.71	4.7	1.36	0
0	40	2	1	1	0	0	0	30	167	67.2	80	88	0.91	0	0	0	2	1	0	0	24.09	123.5	73.5	133	6.73	203	5.8	6.1	30	22	46	9.8	1.7	59	5.66	3.88	143.3	5.37	1.76	3.16	1.46	0
1	40	3	1	1	0	0	0	20	180	67.4	103	109	0.94	0	0	0	1	1	0	0	35.12	122	75	146	5.7	316	5.7	5.6	16	19	44.7	15.1	1.4	90.6	5.38	4.45	138.9	4.39	3.83	2.32	1.16	0
0	40	2	1	1	0	0	0	30	165	71.8	85	97	0.88	0	0	0	1	1	0	0	26.37	123.5	74	143	6.72	152	6.2	5.7	18.58	14	47.9	6.3	1.1	66.6	6.24	3.72	137.7	4.56	4.05	2.25	1.17	0
1	40	2	0	0	0	0	0	30	178	88.7	87	98	0.88	0	0	0	1	1	0	0	27.99	128.5	80	162	6.93	227	5.3	6.5	25	21	44.7	11.1	1.32	61.5	4.95	3.53	141.6	2.7	0.98	1.61	1.01	0
1	40	2	1	1	0	0	0	30	175	83.2	91	98	0.93	0	0	0	1	1	0	0	27.16	125.5	73.5	174	5.39	290	5.6	6.2	37	18	51.3	13.6	1.43	76.2	6.34	4.19	139.3	5.94	1.71	4.16	1.32	0
1	40	3	1	1	0	0	0	30	179	75	88	95	0.86	0	0	0	2	1	0	0	23.4	120.5	79	162	7.43	229	5.5	5.8	25	24	49.8	12.84	1.2	79	3.24	3.82	137.7	5.09	1.08	3.78	0.99	0
1	40	2	1	1	0	0	0	30	180	86.4	97	106	0.92	0	0	0	1	1	0	0	26.66	127	74	159	8.53	219	5.8	6.1	37	26	44.7	14.3	2.33	61.1	4.3	3.69	141.6	4.12	0.61	2.74	1.06	0
1	40	3	1	1	0	0	0	30	177	88.6	106	108	0.98	0	0	0	2	1	0	0	28.28	127	73.5	143	6.64	263	5.2	6	39	22	47.7	17.73	1.5	54	16	4.08	142.1	4.44	1.78	2.56	0.76	0
1	40	2	1	1	0	0	0	30	176	89.3	93	93	0.92	0	0	0	1	1	0	0	32.36	133.25	76.75	154	5.58	372	5.9	6.9	29	19	47.9	13.8	1.1	60	3.61	4.74	138.2	2.81	1.21	1.54	1.01	0
1	40	3	1	1	0	0	0	60	177	88.3	91	103	0.88	0	0	0	2	1	0	0	28.18	125	72.5	171	5.61	252	6.5	5.8	28	17	49.8	16.01	0.7	66	5.59	3.94	139.3	5.16	1.38	3.58	1.19	0
1	41	3	1	1	0	0	0	30	172	84.95	88	92	0.955	0	0	0	2	0	0	0	27.71	125.75	75.5	167	6.19	320	5.9	6	23	19	47.9	20.8	2	69	5.6	4.42	125.9	5.42	1.16	4.05	0.98	0
1	41	3	1	1	0	0	0	60	183	96.4	94	108	0.85	0	0	0	2	1	0	0	28.78	127	71	151	4.5	218	5.6	5.8	30	19	46.6	18.07	1.82	70.4	5.63	3.53	139.8	4.45	1.2	2.38	1.29	0
1	41	2	1	1	0	0	0	20	175	74.8	87	94	0.93	0	0	0	1	1	0	0	24.42	124	73	134	5.44	222	5.6	6.4	21.57	21	49.3	23.83	3.5	51	4.16	4.21	137.3	4.38	1.27	2	1.65	0
1	41	3	0	0	0	0	0	30	175	85.3	87	108	0.81	0	0	0	1	1	0	0	31.24	125.5	76.5	150	6.65	229	6	6	17	15	47.9	14.32	3.1	85.2	4.43	4.1	138.2	3.74	0.84	2.4	1.06	0
0	41	2	1	1	0	0	1	60	158	58.7	76	88	0.92	0	0	0	1	1	0	0	23.51	123	72	136	5.9	210	5.6	6.1	18.21	17	44	14.2	1.4	40.7	5.77	4.31	139.7	6.2	0.54	4.59	1.19	0
1	41	2	1	1	0	0	0	0	171	76.3	96	112	0.86	0	0	0	0	1	20	2	26.09	126	74.5	163	7.67	213	5.6	5.6	5	14	49.8	15	4.59	72	16	4.55	141.9	4.98	2.22	2.71	1.42	0
1	41	3	1	1	0	0	0	30	168	83.3	92	99	0.93	0	0	0	2	1	0	0	29.51	124.5	73	173	5.39	199	6	6.5	59	23	47.9	13.43	1.01	126.4	6	4.2	139.2	6.15	2.02	4.89	0.97	0
1	41	3	0	1	0	0	0	30	176	86.1	103	105	0.98	0	0	0	1	1	5	1	33.89	125	75.5	132	6.6	284	5.7	5.9	48	37	46	13.09	0.68	67	4.7	4.98	142.4	3.78	3.23	2.18	1.05	0
1	41	2	0	0	0	0	0	30	168	72.5	84	90	0.93	0	0	0	1	1	0	0	25.68	122	75.5	168	6.17	165	6	6.4	36	25.88	46	10.87	1.2	60.39	6.04	4	139.5	3.92	0.97	2.52	1.16	0
0	41	3	1	1	0	0	0	30	169	69.7	80	90	0.865	0	0	0	2	1	0	0	22.035	122	77.5	145	7.36	349	5.6	6.2	14	17	46.6	11.64	1.2	59.5	4.14	3.69	140	5.91	3.15	3.37	1.26	0
0	41	3	0	2	0	0	0	30	170	93.6	104	120	0.96	0	0	0	1	1	0	0	32.38	124	71.5	135	6.88	210	5.6	6.4	23	18	51.3	11.2	1.43	50.03	3.4	3.53	140	4.95	2.01	3.32	0.99	0
0	41	3	1	1	1	0	0	0	165	60.1	70	80	0.87	0	0	0	0	0	0	0	19.83	120.5	74.5	140	6.68	152	5.8	5.8	18	24	51.3	18.4	4.6	62.6	5.77	4.21	136.9	4.15	1.41	2.21	1.68	0
1	41	3	1	1	0	0	0	30	175	74.15	89.5	105	0.855	0	0	0	1	1	0	0	24.205	127.75	77.75	162	6.29	244	5.6	6.9	69	48	46	20.97	3.12	47	3.61	4	140.2	4.49	1.27	2.98	0.86	0
1	41	3	0	1	0	0	1	30	182	80	82	91	0.9	0	0	0	1	1	2	0	22.52	124.5	73	162	8.08	238	6	5.6	26	22	46	13.75	2.5	67.7	5.21	3.69	139	5.08	0.91	3.53	1.21	0
0	41	3	1	1	0	0	0	0	165	67.6	88	98	0.89	0	0	0	0	1	0	0	24.83	123.5	73.5	154	6.28	169	5.7	6.6	78	51	51.3	16.43	2.8	67	4.23	3.72	142.4	5.31	4.69	2.43	0.88	0
1	41	2	0	1	0	0	0	30	179	78.1	88	98	0.9	0	0	0	1	0	10	0	26.96	123	75.5	157	7.23	327	6	6.1	12	20	44.7	15.1	2.39	75	4.23	4.58	139.8	4.52	1	3.47	0.96	0
1	41	2	1	1	0	0	0	30	182	79.9	89	100	0.89	0	0	0	1	1	0	0	24.12	132.5	81	164	3.7	178	5.93	6	20	19	51.3	15.24	2	64	4.14	3.8	140.5	5.14	0.85	4.29	1.1	0
0	41	3	0	1	0	0	0	30	164	65.7	85	96	0.88	0	0	0	2	1	0	0	24.42	120.5	74.5	143	5.02	176	5.8	6.6	20	20	48.4	13	1.01	69.4	6.56	4.28	141	5.92	1.26	3.84	1.35	0
1	41	3	1	1	0	0	0	30	178	99.4	108	111	0.97	0	0	0	1	1	0	0	31.11	122.5	74.5	156	6.61	295	5.4	5.5	35.76	19	47.6	9.7	1.3	63	4.87	3.73	139.5	4.93	1.83	3.27	1.08	0
1	41	2	1	1	0	0	0	0	173	79.5	93	82	1.13	0	0	0	0	1	10	2	26.56	127.5	75	163	6.31	175	6.13	6.5	15	18	51.3	7.34	1	86.3	7.53	4.33	137.5	4.24	1.15	2.57	1.23	0
1	41	2	0	1	0	0	0	50	175	69.8	87	100	0.87	0	0	0	2	1	0	0	22.79	125	73.5	136	7.88	253	6	5.7	19.03	20	50.1	8.6	1.4	75.3	3.98	4.1	140.7	5.27	2.09	3.45	1.22	0
0	41	2	0	1	0	0	0	30	158	58.4	80	95	0.84	0	0	0	1	1	0	0	23.39	127	74	142	4.28	353	5.4	6.9	12.48	15	48.4	7.27	1.3	58.2	7.14	4.94	138.7	6.86	1.95	4.13	1.51	0
1	41	3	1	1	0	0	0	30	180	72	78	89	0.87	0	0	0	1	1	0	1	22.215	129	80	154	7.56	284	6.3	6.3	26	18	49.8	20.95	3.4	67	4.96	3.88	138.2	5.37	1.53	3.54	1.24	0
0	41	3	1	1	0	0	0	30	162	63.45	76	88	0.86	0	0	0	2	1	0	0	20.95	125.25	74.5	139	6.84	338	5.9	6.41	26	18	48.8	11.45	1.4	56	3.61	3.73	139.8	5.37	1.16	2.94	2.07	0
0	41	3	1	1	0	0	0	30	162	68.5	89.5	102	0.875	0	0	0	1	1	0	0	26.1	130.75	85.75	145	7.12	237	5.9	6.1	26	23	41.8	8.79	1.01	56.2	3.36	4.21	137	5.43	2.71	2.85	1.23	0
1	41	2	1	1	0	0	0	30	168	78.6	86	101	0.85	0	0	0	2	0	20	2	27.84	122.5	73.5	153	5.29	319	5.7	6.2	17	19	46.6	5.32	1.3	60.8	6.84	5.31	141.5	4.91	0.82	3.02	1.6	0
1	41	3	1	1	0	0	0	0	182	82.4	95	110	0.86	0	0	0	0	1	0	0	30.47	129	79	156	4.52	184	5.7	5.5	18	15	47.9	15.08	1.8	67	6.01	4.45	140	10.42	3.35	7.22	1.52	0
1	41	3	1	1	1	0	0	30	182	93.3	93	112	0.83	0	0	0	2	1	0	2	28.16	124	71	139	6.54	338	6	5.5	22	19	47	9.7	1.49	78.1	5.16	4.34	142.3	4.67	2.74	2.54	1.03	0
0	41	2	1	1	0	0	0	30	158	64.4	80	88	0.9	0	0	0	2	1	0	0	24.35	124.5	75.5	139	6.01	276	5.6	7	18	23	44.7	9.7	1.4	55.7	5.77	4	139.7	6.71	3.98	4.22	1.1	0
1	41	2	1	1	0	0	0	30	175	71.9	84	95	0.88	0	0	0	1	1	0	0	23.77	125	74.5	185	5.04	272	5.8	6	38	22	44.7	21.6	2.4	86.9	4.78	4.18	140.5	5.1	1.55	3.78	0.92	0
1	41	2	1	1	0	0	0	50	173	82.6	83	92	0.9	0	0	0	1	1	0	0	27.59	125.5	75	150	6.62	195	6.3	7.8	36	22	51.3	13.88	3.67	94	7.14	4.27	138.2	4.26	1.48	2.67	1.07	0
0	41	2	1	1	0	0	0	30	163	82	93	105	0.88	0	0	0	2	1	0	0	30.86	124.5	76.5	130	6.99	263	5.8	5.4	24	18	46.7	12.67	2.54	56	3.61	3.7	142.5	7.64	1.87	4.59	1.84	0
0	41	2	1	1	0	0	0	30	160	79	88	115	0.76	0	0	0	2	1	0	0	30.85	120.5	75.5	148	4.22	242	5.7	5.5	38	25	45.2	8.3	1.1	48.2	4.16	4.54	139.1	5.56	0.84	3.77	1.69	0
1	41	2	1	1	0	0	0	0	170	55	78	84	0.93	0	0	0	2	1	0	0	19.03	90.5	64	147	6.51	234	22.29	10.1	31	20	41.8	3.94	1.4	80.4	8.17	4.42	133	5.61	2.17	3.22	1.41	0
0	41	3	1	1	0	0	0	20	160	60.5	72	78	0.92	0	0	0	1	1	0	0	21.4	122.5	71	124	6.25	295	5.4	6.2	21	23	42.9	11.95	1.35	48.8	2.96	3.94	139.8	3.2	1.63	0.45	1.88	0
1	41	3	0	1	0	0	0	60	168	81.6	88	96	0.92	0	0	0	1	1	0	0	28.91	125	73.5	129	7.79	249	6.4	7	66	63	51.4	22.86	6.71	103.8	7.13	4.16	137	3.04	2.08	0.96	0.99	0
1	42	3	1	1	0	0	0	30	175	74.5	76	88	0.86	0	0	0	1	1	0	0	24.32	125.5	72	156	6.82	289	5.2	6.1	55	30	51.3	14.05	1.86	55	4.01	3.9	136	3.63	0.57	2.05	1.16	0
1	42	3	1	1	0	0	0	30	168	99	100	110	0.905	0	0	0	1	1	2	0	35.075	126.25	76.5	161	5.57	200	5.2	5.9	69	47	45.6	22.3	3.05	50.1	4.95	3.69	139.9	2.58	1.8	4.15	1.18	0
1	42	2	1	0	0	0	0	30	181	95.5	92	101	0.91	0	0	0	1	1	0	0	26.12	125	72.5	170	5.72	249	5.3	6.3	26	15	45.33	12.55	5	52.92	7.84	3.73	137.2	3.02	1.68	1.46	1.22	0
1	42	3	1	1	0	0	0	30	180	78.4	83	98	0.84	0	0	0	1	1	0	0	24.19	125.5	72.5	165	4.94	169	5.3	5.4	29	27	47.9	16.47	2.1	73.8	4.27	4.34	141.5	5.23	1.95	3.55	0.96	0
1	42	2	1	1	0	0	0	30	172	88.7	88	100	0.88	0	0	0	1	1	15	0	29.98	125.5	66.5	156	9.39	260	5.4	6	21.56	18	45.33	8.9	1.35	65	4.25	4.07	133.6	3.89	0.7	3.06	0.83	0
0	42	3	1	1	1	0	0	30	160	64.4	75	80	0.93	0	0	0	1	1	0	0	25.15	133.5	81.5	118	7.73	237	6.2	6.5	23	20	45.3	6.3	1.1	65	4.27	3.69	142	5.57	3.71	3.36	0.96	0
1	42	3	1	1	0	0	0	30	170	65	78	96	0.81	0	0	0	2	1	0	0	22.49	116.5	71	147	7.52	273	5.9	5.4	27	28	47.9	7.79	1.4	73.7	2.96	4.46	137.3	6.88	1.42	4.44	1.43	0
0	42	2	1	1	0	0	0	40	155	54.5	70	90	0.78	0	0	0	1	1	0	0	22.72	129	72.5	146	4.75	271	6.71	6.2	55	52	44.7	8.5	1.3	45.2	4.3	3.74	138.2	4.17	1.56	2.35	1.09	0
1	42	3	1	1	0	0	0	30	176	72.6	84	97	0.87	0	0	0	1	1	0	0	23.44	124.5	76	142	6.11	198	5.8	5.5	18	18	48.4	8.05	1.7	105.69	4.5	4.27	140.7	3.86	1.48	2.11	0.97	0
1	42	2	1	1	0	0	0	30	183.7	81.55	85	96	0.88	0	0	0	1	1	2.5	1	24.165	126	76	157	2.89	160	5.9	6.1	54	29	46	22.77	5.06	66.7	5.31	4.5	140.9	3.79	1.42	1.98	1.25	0
1	42	3	0	1	1	0	0	30	176	58.8	73	87	0.84	0	0	0	2	1	0	1	18.98	121.5	66.5	153	4.24	285	5.6	5.6	14	16	47.9	13.4	1.57	69	5.16	4.2	141.3	5.54	1.4	3.61	1.37	0
1	42	3	1	1	0	0	0	30	180	98.7	96	105	0.91	0	0	0	1	1	0	0	30.455	125.25	75	171	4.9	256	5.7	6.1	25	18	49.8	18.15	3.7	66	4.95	4.34	130.4	5.17	1.09	3.5	0.9	0
1	42	3	0	1	0	0	0	30	175	74	80	95	0.84	0	0	0	1	1	0	0	24.16	131.5	80	152	9.35	275	6.5	6.2	22	24	47.9	14.87	2.43	67.5	4.96	4	137.7	3.81	0.77	2.11	1.13	0
1	42	2	0	1	0	0	0	20	180	82.3	92	100	0.92	0	0	0	1	1	0	0	27.87	122.5	74.5	167	6.3	266	6.3	5.8	25	20	44.7	13	1.7	72.5	10.1	4.58	136	3.91	1.48	2.87	0.92	0
0	42	3	1	1	0	0	0	30	160	64	86	91	0.95	0	0	0	1	1	0	0	25	131	76	143	5.56	228	5.9	6.2	48.33	32	46	16.39	3.07	40.7	7.14	4.73	140.9	6.26	3.18	3.58	1.54	0
0	42	3	0	1	0	0	0	30	172	71	80	90	0.88	0	0	0	2	1	0	0	23.99	120.5	79	130	6.03	261	5.8	5.8	30	20	46.6	8.01	1.1	55	4.5	4.31	139.7	5.22	3.03	2.89	1.18	0
1	42	2	0	1	0	0	0	30	170	81	84	96	0.87	0	0	0	2	1	0	0	28.02	124	73.5	147	7.97	243	5.7	6.4	36	27	48.4	14.6	2.2	58.63	4.01	4.46	138.4	3.94	1.32	2.48	1.07	0
1	42	2	1	1	0	0	0	30	183	79.6	85	96	0.89	0	0	0	1	1	0	1	23.76	127	71	146	8.41	181	5.8	6.5	54	40	49.8	11.5	1.29	79	3.4	3.74	137.7	5.02	2.18	3.51	0.83	0
1	42	2	1	0	0	0	0	30	186	81	90	104	0.86	0	0	0	2	1	0	0	23.41	121.5	72.5	155	3.79	163	5.8	6.1	29	22	49	18.35	2.6	74.1	6.56	3.47	141.2	3.91	1.61	2.47	0.93	0
0	42	3	1	1	0	0	0	30	165	65.05	75	84	0.89	0	0	0	2	1	0	0	22.77	120.5	81	134	9.38	152	5.8	6	15	15	47.24	7.08	1.7	65.3	4.96	3.94	141.2	8.09	4.23	5.67	1.03	0
0	42	3	1	2	0	0	0	50	162	58.75	78	86	0.905	0	0	0	1	1	0	0	22.385	123.75	74.25	131	6.73	280	5.3	6	19	18	47.9	10.7	1.1	57.6	5.21	4.47	138.6	6.42	2.15	4.37	1.29	0
1	42	2	1	1	0	0	0	30	168	61.3	78	87	0.89	0	0	0	2	1	0	2	21.71	123.5	74.5	149	5.56	247	5.6	5.5	14	18	47.9	12	0.8	73	5.39	4.36	140.6	4.92	1.26	3.12	1.35	0
0	42	2	0	1	0	0	0	30	155	68	86	94	0.91	0	0	0	2	1	0	0	28.3	119	71.5	149	5.61	184	5.8	6.4	45	35.27	51.1	7.5	1.4	51	16	4.55	141	7.24	1.69	5.43	1.18	0
0	42	2	1	1	0	0	0	30	157	50	78	80	0.97	0	0	0	2	1	0	0	20.28	123.5	77.5	139	7.22	304	5.8	6.5	21	16.87	51.25	10.38	0.91	36	3.61	3.82	140.3	6.51	1.9	4.71	1.35	0
1	42	3	1	0	0	0	0	0	185	88.6	94	102	0.92	0	0	0	0	1	0	0	28.22	125	72	137	7.43	198	5.6	6.3	19	18	47.6	8.6	3	90.5	4.62	4.76	139	5.39	2.53	4.04	0.76	0
1	43	3	1	1	0	0	0	0	185	78.9	85.5	96	0.89	0	0	0	0	1	0	0	23.05	133	84	151	6.86	195	5.9	5.8	107	46	46	14	1.8	58.63	5.6	3.74	142.3	4.76	2.68	2.41	1.29	0
0	43	3	1	1	1	0	0	30	157	51	78	86	0.9	0	0	0	1	1	0	0	20.69	131.5	75.5	142	5.1	349	5.7	6.2	15.43	20	47.9	10.49	0.9	52.3	5.6	4.14	139.2	6.21	0.74	5.23	1.23	0
1	43	2	0	1	0	0	0	50	170	81.3	94	103	0.91	0	0	0	1	1	0	0	28.13	131.5	75	162	6.28	240	5.3	6	19	23	46	18.2	2.9	93.5	4.87	4.11	141.3	4.93	1.76	2.73	1.17	0
1	43	2	0	1	1	0	1	30	180	88.2	83.5	95	0.875	0	0	0	1	1	8.5	1	22.17	131	81.25	157	5.73	226	5.9	5.5	72	52	49.2	20.88	3.2	68.1	6.46	3.53	137.8	5.45	1.27	4	1.37	0
1	43	3	1	1	0	0	0	0	175	70	80	85	0.94	0	0	0	0	1	0	0	22.85	125.5	77.5	142	8.7	240	5.6	6	25	19	48.4	14.9	2	82	6.28	4.32	130.4	4.14	1.11	2.42	0.84	0
0	43	3	1	1	0	0	0	30	160	62	84	98	0.86	0	0	0	1	0	0	0	24.21	130	79.5	153	5.38	221	6.5	6.1	15	18	47.9	20.97	1.3	36	5.32	2.81	140.1	6.68	1.86	4.08	1.34	0
1	43	2	1	1	0	0	0	0	170	74	85	96	0.88	0	0	0	0	1	0	0	25.6	120.5	71	146	4.88	323	5.8	7.2	15	19	46	6.2	1.32	59	2.96	4.1	134.5	4.05	0.98	2.49	1.33	0
1	43	3	1	1	0	0	0	20	186	99.4	101	99	1.02	0	0	0	1	1	0	0	28.73	132.5	80.5	150	7.24	146	5.5	6.2	24	18	48.2	17.8	2.17	59	5.32	4.21	139.4	4.71	1.5	3.63	1.06	0
1	43	3	1	1	1	0	0	30	170	88.6	100	112.5	0.885	0	0	0	1	1	0	0	30.655	133.25	79.25	165	4.94	245	5.2	5.6	77	38	44.7	13.2	1.3	74.6	6.2	3.94	144.1	4.1	2.17	2.35	0.92	0
1	43	3	1	1	0	0	0	60	176	92.4	107	115	0.93	0	0	0	1	1	8	1	31.31	125.25	74.75	157	6.12	207	5.9	6.8	136	62	46.6	8.5	1.4	64.9	3.88	4.11	143.4	5.67	2.93	3.44	1.17	0
1	43	3	1	1	0	0	0	0	165	71.65	93	105	0.885	0	0	0	0	0	0	0	26.31	125	76.25	158	5.47	215	5.7	6	35	27	44.7	11.5	1.85	90	5.43	4.06	140.5	5.68	0.93	3.94	1.37	0
1	43	3	1	1	0	0	0	30	173	81	86	98	0.87	0	0	0	2	1	1	0	27.06	122	72.5	156	6.37	200	5.6	6	12	14	46	13.4	1.3	82.4	5.86	3.9	140.3	4.34	1.8	2.79	1.01	0
0	43	3	1	1	0	0	0	20	163	80	92	103	0.89	0	0	0	1	1	0	0	30.11	126.5	78	128	7.63	252	6.3	6.5	6	13	45.33	6.15	1.49	64.2	5.56	3.68	142	4.37	2.03	2.24	1.1	0
1	43	3	1	1	0	0	0	20	185	98	98	103	0.95	0	0	0	2	1	0	0	31.14	126.5	72	147	6.22	262	5.8	5.9	23.61	19	49.8	11.57	1.7	62.8	5.23	4.39	138.2	5.73	0.77	4.77	1.14	0
1	43	2	1	1	0	0	0	60	180	78	87.5	96	0.89	0	0	0	2	1	5	1	24.07	127.5	83.25	159	8.79	233	6.5	6.1	24	19.64	47.9	13.05	1.57	90.5	4.82	4.38	139.9	6.82	1.16	5.11	1.44	0
1	43	3	1	1	0	0	0	30	183	88.5	102	110	0.92	0	0	0	2	1	0	0	32.84	127.5	76.5	175	6.64	230	5.9	5.6	38	28	47.9	15.06	1.4	38	5.31	4.4	141.7	3.67	1.8	2.41	0.97	0
1	43	3	1	1	0	0	0	30	160	62	80	100	0.8	0	0	0	2	1	0	0	23.75	132.5	80	150	5.84	344	6.1	5.8	42	21	45.6	8.4	1.3	53	7.84	4.31	140	3.11	1.57	1.52	1.26	0
0	43	3	1	1	0	0	1	20	165	73.2	89	96	0.93	0	0	0	2	1	0	0	26.88	125.5	75.5	128	6.36	376	5.6	6.3	34	25	49.7	9.6	1.78	69	6.02	4.56	138.3	5.47	0.97	3.39	1.35	0
0	43	3	1	1	0	0	0	30	158	58.7	78	84	0.885	0	0	0	1	1	0	0	23.51	122.5	73.5	149	8.96	273	5.6	6.4	30.39	20	51.3	10.9	0.44	45.2	6.56	3.74	138.2	4.78	2.21	2.77	1.21	0
1	43	2	1	1	0	0	0	20	170	60.2	80	90	0.88	0	0	0	2	1	5	0	20.825	124	74.25	155	4.22	213	5.1	5.8	21	22	41.8	19.22	2	69.18	5.75	3.82	139.1	4.91	0.72	3.39	1.6	0
1	43	2	1	1	0	0	0	0	175	70.4	84	96	0.88	0	0	0	0	1	0	0	22.98	126.5	73.5	173	7.33	232	5.5	6	45	33	44.7	18.1	1.3	60.4	4.38	3.73	140.1	4.71	1.25	3.26	0.86	0
1	43	3	0	1	0	0	0	60	187	79.2	84	96	0.88	0	0	0	1	1	0	0	22.64	122.5	73	147	4.93	276	5.6	6.7	44	17	51.3	10.2	1.4	83.7	4.41	4.22	139	4.4	1.78	2.49	1.25	0
0	43	3	1	1	0	0	0	30	158	65.5	94	100	0.9	0	0	0	1	1	0	0	26.23	120.5	75.5	124	6.68	280	5.8	6.5	28	23	44.46	17.1	2.8	53	4.48	4.35	139.3	6.63	1.04	4.76	1.22	0
1	43	3	1	1	0	0	0	0	178	94.8	88	98	0.89	0	0	0	2	1	0	0	29.92	133.5	81.5	144	6.09	226	5.2	5.8	15	17	45.33	17	2.65	73.3	4.56	3.73	139.8	4.09	1.6	1.59	1.17	0
1	43	2	1	1	0	0	0	30	180	75	88	97	0.82	0	0	0	2	1	0	0	23.14	120.5	79	172	6.71	183	5.9	6.1	23	13.36	49.8	8.9	0.91	66.7	4.12	4.46	139.5	3.94	1.51	2.6	1.06	0
1	43	3	1	1	0	0	0	30	182	78	86	94	0.91	0	0	0	2	1	5	0	23.54	125	76	160	3.39	241	5.7	5.6	36.71	27.63	46	5.23	0.9	69.4	4.3	3.94	143.1	6.3	3.72	3.97	1.26	0
1	43	3	1	1	0	0	0	60	182	93	88.5	103.5	0.9	0	0	0	2	1	0	0	28.07	121	82.5	159	4.51	238	6.1	6	21	17	44.7	8.8	3	73.9	4.09	3.82	140.3	4.71	1.81	3.17	1.43	0
1	43	3	1	0	0	0	0	20	173	85.35	86	100	0.86	0	0	0	1	1	0	0	28.51	127.75	79.25	169	5.6	209	5.6	6.3	66	39.38	46	24.41	4.9	70.09	6.01	4	139.4	4.73	1.24	3.36	1.32	0
0	43	3	1	1	0	0	0	30	170	79	85	99	0.87	0	0	0	1	1	0	0	27.33	120.5	77.5	146	3.63	258	5.6	6	20	18	51.4	16.39	2.01	58.2	7.14	4.09	141.8	4.53	0.74	3.47	1.25	0
1	43	3	1	1	0	0	0	30	172	74.4	85	98	0.86	0	0	0	1	1	1	0	25.145	130.25	78.25	167	4.27	222	5.6	5.5	22	20	47.9	13.8	2.01	60	16	3.74	142.5	4.63	1.54	3.21	1.19	0
1	43	3	1	1	0	0	0	20	172	82.3	86	97	0.88	0	0	0	2	1	0	0	27.81	126	74.5	152	10.19	261	6.3	6.3	12	14	46	10.32	1.2	70.6	5.4	4.75	137.2	7.92	1.81	5.81	1.11	0
1	43	2	1	1	0	0	0	0	176	80	85	96	0.88	0	0	0	0	1	0	0	25.82	120.5	71	126	9.27	237	5.7	6	37	22	43.3	13.2	1.89	68.5	5.63	2.81	142.7	4.34	1.11	2.78	1.16	0
1	43	3	1	1	0	0	0	30	165	76.2	84	94	0.89	0	0	0	1	1	0	0	27.98	124.5	71.5	145	5.15	220	5.5	5.3	38	72	48.07	16.5	2.63	102.4	8.73	3.8	143.8	3.41	0.85	1.95	1.23	0
1	44	3	1	1	1	0	0	0	174	93	110	120	0.91	0	0	0	0	1	5	0	35.34	124.5	75	159	4.76	247	5.6	5.7	19	12	47.9	9.6	1.78	76.56	3.82	4.33	140.6	4.25	3	2	0.76	0
1	44	3	1	1	0	0	0	30	172	73	90	100	0.9	0	0	0	1	1	8	1	24.67	123	75	169	7.54	182	6.4	5.6	54	29	46	13.6	0.4	56.79	5.02	3.72	141.5	4.02	2.09	1.82	1.06	0
1	44	2	1	1	0	0	0	30	185	90.1	93	104	0.89	0	0	0	1	1	0	0	29.8	128	77.5	154	8.16	206	6.1	7.2	37	25	46	9	1.1	94	4.77	5.93	140.4	6.56	1.9	3.45	1.9	0
0	44	3	1	1	1	0	0	30	165	60.05	78.5	96	0.815	0	0	0	1	1	0	0	22.05	130.5	75.75	133	6.06	317	5.9	5.7	14	32	51.3	12.15	0.7	69.5	6.01	4.35	137	9.7	4.61	4.62	2.24	0
0	44	3	1	1	0	0	0	30	157	51	81	86	0.94	0	0	0	1	1	0	0	20.69	123.5	73.5	132	6.61	327	5.6	5.8	17	22	49.1	11.43	1.4	55	6.41	3.91	141.6	4.21	2.23	2.17	1.39	0
1	44	3	1	1	0	0	0	30	170	80	90	94	0.95	0	0	0	1	1	0	0	27.68	120.5	70.5	174	6.98	181	6	6.7	55	30	49.8	17.9	2.17	84	7.27	4	137.7	4.33	1.35	2.73	1	0
1	44	3	1	1	0	0	0	30	184	99.4	98	106	0.92	0	0	0	1	1	0	0	29.35	125.5	71.5	162	7	163	5.6	5.8	62	41	47.9	13	0.4	69	4.35	3.69	141.8	3.98	1.48	2.26	1.19	0
0	44	3	1	1	0	0	0	30	158	53.2	74	78	0.94	0	0	0	1	1	0	0	21.31	125	77.5	131	5.6	294	5.9	6.9	32	24	48	11.8	1.4	47	3.61	3.72	140.6	4.94	2.72	3.89	0.72	0
0	44	3	0	1	0	0	0	30	160	53	74	92	0.8	0	0	0	2	1	0	0	20.7	116.5	72	135	6.99	252	5.3	5.7	56	42	44.5	15.34	1.2	39.6	16	4.46	142.4	5.14	2.7	3.21	1.08	0
1	44	3	0	1	0	0	0	30	173	82.5	80	90	0.88	0	0	0	2	1	5	1	27.56	126.5	76.5	138	6.28	143	5.4	5.4	19.83	21	51.1	14.2	1.85	73.8	5.34	3.86	139.1	4.98	0.64	3.14	1.39	0
1	44	2	1	1	0	0	0	0	170	81.8	82	90	0.91	0	0	0	2	1	0	0	28.3	126.5	76.5	157	7.27	256	5.3	5.8	23	18	47.6	12.41	1.6	63	4.25	3.8	140.2	4.9	1.49	3.52	0.92	0
1	44	3	1	1	0	0	0	0	178	87.3	94	103	0.91	0	0	0	0	1	20	0	27.55	126	76.5	162	5.6	214	5.6	6.6	31	24	49.1	14.7	4.33	79.8	4.95	4.32	138.7	3.75	1.78	2.14	0.99	0
0	44	3	1	1	0	0	0	30	166	62.05	82.5	98	0.845	0	0	0	1	1	0	0	22.51	128.25	83.25	128	5.9	336	5.7	6	24	20	51.3	7.6	0.9	62	4.14	4.06	140	6.16	2.71	4.12	1.2	0
0	44	3	1	1	0	0	0	30	158	58.3	78	96	0.81	0	0	0	2	1	0	0	23.35	126.5	72	154	6.08	317	5.6	6.1	13	20	46	11.4	1.9	38	5.32	4	138.7	8.57	2.03	5.76	2.09	0
0	44	3	1	1	0	0	0	0	160	50.45	74	95	0.78	0	0	0	0	1	0	0	19.705	136	84.25	155	5.05	223	5.9	6.4	60	35	46	8	1.33	77	5.33	4.37	137.4	6.53	4.53	2.94	1.65	0
0	44	2	1	1	0	0	0	30	158.3	57.7	77	89	0.87	0	0	0	1	1	0	0	23.02	123	70.5	135	5.35	297	5.8	6	25	20	50.1	5.8	1.1	68.8	6.64	4.54	139.1	5.47	1.82	3.61	1.28	0
0	44	2	1	1	1	0	0	40	160	65.7	75	88	0.85	0	0	0	1	1	0	0	25.66	123	71	132	4.77	276	5.6	6.2	16	17	49	8.85	1.4	38.4	4.16	3.96	139.3	3.89	0.85	2.44	1.42	0
1	44	2	1	1	0	0	0	30	170	73.6	88	98	0.9	0	0	0	1	1	0	1	25.46	124.5	78	146	7.29	290	5.7	5.7	20	19	49.8	13.26	2.1	79.4	8.53	4.41	138.6	6.14	4.33	3.31	1.15	0
0	44	3	0	1	0	0	0	30	161	64.85	85	100	0.85	0	0	0	1	1	0	0	25.015	123.75	75	135	5.78	233	5.6	6.1	14	17	45.9	10.9	1.2	52	4.14	3.96	140.3	4.74	2.26	3.34	0.96	0
1	44	3	1	1	0	0	0	0	170	69	80	90	0.88	0	0	0	0	1	0	0	23.87	121.5	74.5	152	5.79	187	5.7	5.7	23	18	51.3	10.4	0.7	52	4.01	2.81	133	6.33	1.12	4.44	1.15	0
1	44	2	1	1	0	0	0	30	179	77.6	78	87	0.9	0	0	0	1	1	0	0	24.21	123	66.5	154	4.81	236	5.4	5.9	43	34	44.7	10.67	1.7	80.1	4.57	4.73	142.4	6.86	1.86	5.5	1.18	0
0	44	2	1	1	0	0	0	30	164	54.3	76	89.5	0.845	0	0	0	1	0	0	0	20.185	130.25	78.75	150	5.47	316	6.3	5.8	21	21	46	14	1.29	69.4	4.95	4.37	142.2	5.25	3.17	3.11	0.86	0
1	44	3	1	1	0	0	0	30	175	75	83	98	0.84	0	0	0	2	1	0	0	24.48	123.5	71	176	8.7	227	5.9	5.7	16	18	49.8	11.1	1.1	57	7.14	4.39	137.5	6.54	2.1	4.88	1.45	0
1	44	3	1	1	0	0	0	0	172	70	86	92	0.93	0	0	0	0	1	0	0	23.66	129	81.5	174	5.71	230	5.9	6.4	41	28	49.8	12.29	1.4	86	5.41	4.54	141.1	6.12	2.31	4.67	1.24	0
1	44	2	0	1	0	0	0	40	178	83.2	88	97	0.91	0	0	0	1	1	0	0	26.25	125	74	152	8.52	226	5.4	6.4	21	16	48.2	8.7	0.7	78.5	4.52	4.46	139.3	4.59	0.92	2.93	1.19	0
0	44	2	1	1	0	0	0	30	163	52.6	78	88	0.89	0	0	0	2	1	0	0	19.79	123.5	73.5	112	3.85	201	5.6	5.9	20	25	46.3	10.02	1.4	63	5.35	4.24	137.8	4.69	0.45	2.51	1.77	0
1	44	2	1	1	0	0	0	30	173	87.2	98	110	0.89	0	0	0	1	1	0	0	29.13	124	75	145	4.62	339	5.6	6.7	34	22	47.7	6.5	1.7	75	4.36	3.73	139.4	8.18	3.24	5.15	1.16	0
1	44	2	1	1	0	0	0	40	170	66.6	83	92	0.9	0	0	0	1	1	0	1	23.04	122	73	137	4.43	252	5.2	6	12	19	48.4	16.64	2.8	94.93	8.17	5.17	137	4.09	0.99	2.16	1.54	0
1	44	3	1	1	1	0	0	30	170	95	90	85	1.06	0	0	0	1	0	0	0	32.87	129.5	79	170	7.97	228	6.1	5.7	39	20	51.3	10.59	1.3	53.16	3.78	4.21	139.3	4.95	2.23	3.92	0.85	0
0	44	3	1	1	0	0	0	30	160	59	75	88	0.85	0	0	0	2	1	0	0	23.04	120.5	73.5	140	8.51	325	5.8	6.2	20	14	45.6	9.6	0.44	78	4.18	4.54	140.2	4.5	2	2.45	1.04	0
0	44	2	1	1	0	0	0	0	171	66	80	90	0.88	0	0	0	0	1	0	0	22.57	120.5	77.5	152	5.19	281	5.8	5.9	33	15.52	46	12.77	1.76	50.9	5.59	4.31	141.3	3.88	2.23	1.97	0.96	0
0	44	3	1	1	1	0	0	30	160	69.8	82.5	96	0.855	0	0	0	1	1	0	0	27.26	132.25	77.25	147	7.8	326	6.7	6.8	27	16	44.7	6.84	0.91	48.55	4.95	3.69	144	5.75	8.95	1.62	0.91	0
1	44	2	0	1	0	0	0	30	170	75.7	88	100.6	0.91	0	0	0	1	1	0	0	26.19	119.5	72.5	158	8.52	286	5.3	6	10	17	44.7	8.3	1.6	72	4.76	3.47	140.8	4.48	2.58	2.78	0.75	0
0	44	3	1	1	1	0	0	30	160	66.4	87.5	96	0.915	0	0	0	1	1	0	0	25.93	127.75	76	133	4.37	264	5.9	6.2	33	29	46.2	6.69	0.9	39.6	6.37	4.34	142.3	4.81	1.95	2.43	1.32	0
1	44	2	0	1	0	0	0	0	170	75	85	95	0.89	0	0	0	0	1	0	0	25.95	120.5	71	132	5.15	194	5.8	5.9	25	23	47.5	7	1.4	49	5.32	4.17	137	7.26	1.84	4.99	1.35	0
0	44	2	0	1	0	0	0	60	158	57.7	74	78	0.95	0	0	0	1	1	0	0	23.11	122.5	73	135	5.13	262	5.6	5.5	43	20	51.3	11.45	1.4	66	6.8	4.01	141	4.77	1.43	2.96	1.37	0
1	44	2	1	1	0	0	0	0	170	86.3	94	103	0.91	0	0	0	0	1	0	0	29.86	127.5	79	129	7.21	262	6.2	6.9	24	21	47.34	9.7	1.57	75.5	4	3.81	139	6.33	0.91	5.13	1.01	0
0	44	2	0	0	0	0	0	30	172	69.2	78.5	96	0.88	0	0	0	1	1	0	0	23.39	123	66	111	6.29	328	5.6	6.4	22	18	47.6	12.5	2.2	83.5	5.11	4.8	135.6	3.73	1.16	2.97	1.01	0
1	45	2	1	1	0	0	0	60	158	79.7	85	100	0.88	0	0	0	1	1	0	0	31.92	126.5	72.5	148	10.32	313	6.2	7.2	24	21	51.3	9.6	2.49	84.8	3.61	4.11	136.5	4.05	1.19	2.4	1.03	0
1	45	2	1	1	0	0	0	30	165	65.8	83	92	0.9	0	0	0	2	1	20	2	24.16	124	75	145	5.57	261	5.3	6.1	35	23	49.67	17.99	2.7	68.69	5.24	3.99	142.6	3.91	1.32	2.29	1.28	0
0	45	3	1	0	0	0	0	0	160	60	90	108	0.91	0	0	0	0	1	0	0	23.43	120.5	71	125	4.49	357	5.8	6.6	12	15	53.1	5.4	1.61	36	16	4.69	137.4	5.66	0.78	3.32	1.74	0
1	45	3	1	1	0	0	0	30	176	84	89	98	0.9	0	0	0	2	1	5	1	27.11	120.5	71.5	153	7.84	270	5.7	5.7	23	30	51.3	13.14	2.74	57	16	4.86	137.7	5.35	0.48	3.99	1.29	0
1	45	2	1	1	0	0	0	60	169	61.2	78	90	0.87	0	0	0	1	1	0	0	21.42	125	72.5	170	5.71	187	5.2	5.7	14	17	46	12.7	2.56	77.2	4.2	3.94	135.8	6.88	3.72	4.14	0.96	0
0	45	2	0	1	0	0	0	30	160	55	62	89.5	0.88	0	0	0	1	1	0	0	21.48	133	85.5	139	8.42	247	5.82	5.5	36	24	48.4	4.62	1.7	52	4.86	4.75	139.4	3.97	2.78	1.56	1.42	0
1	45	2	1	1	1	0	0	30	174.6	70.5	85	96	0.88	0	0	0	1	1	5	1	23.12	129	76	160	5.32	241	6.18	6	15	15	51.3	8.2	1.8	98.4	5.76	3.88	139	3.81	1.88	2.28	1.13	0
1	45	2	1	1	0	0	0	0	185	96.5	96	102	0.94	0	0	0	0	1	0	0	28.19	123.5	72.5	158	9.86	187	6.1	5.5	24	19.82	47.9	8	2.2	75	6.63	3.53	138.5	3.81	0.84	2.62	1.31	0
1	45	3	1	1	0	0	0	30	183	88	92	98	0.93	0	0	0	2	1	0	0	26.27	125	70.5	163	6.53	177	5.7	6	62	50	46	28.4	3.11	89	5.41	4.21	139.7	4.21	0.99	2.86	1.26	0
1	45	3	0	1	0	0	0	30	181	97.5	105	110	0.95	0	0	0	1	1	0	0	31.91	124	78.5	129	6.89	261	5.3	5.9	14	16	46	7.4	1.1	77.2	4	4.31	136.9	4.44	1.09	3.24	0.97	0
0	45	3	1	1	1	0	1	30	152	62.5	81	100	0.81	0	0	0	1	1	0	0	27.05	125.5	77	141	6.8	221	6.3	6	38	22	50.1	6.23	1.2	54.1	4.52	3.95	142.2	4.5	1.75	2.98	1.06	0
1	45	3	1	1	0	0	0	30	178	90.15	92	110.5	0.88	0	0	0	1	1	0	0	28.45	125	75	145	4.47	288	5.7	5.7	37	25	48.4	9.1	1.01	94	6.06	4.21	140.4	6.49	2.22	4.12	1.22	0
1	45	3	1	1	0	0	0	40	173	78.55	90	98	0.8	0	0	0	1	1	20	0	26.24	124	75.5	174	5.85	288	6.1	6.7	23	18	48.4	15.02	2.02	109	5.42	4.05	137.5	5.01	1.11	3.78	0.98	0
1	45	3	1	1	0	0	0	30	174	95.6	110	123	0.89	0	0	0	2	1	0	1	36.33	125.5	74.5	157	5.06	267	6.1	5.7	17	4	46	19.2	2.5	74.7	4.07	4.4	142	4.95	2.73	3.19	0.69	0
1	45	3	1	1	0	0	0	30	173	79.6	87	98	0.89	0	0	0	2	1	0	0	26.59	125.5	74.5	160	5.29	260	5.6	6	53	31	47.9	21.52	2.94	74	4.25	3.72	138.6	3.93	2.09	2.09	1.11	0
1	45	2	0	0	0	0	0	30	173	83.2	94	102	0.92	0	0	0	1	1	0	0	27.79	122.5	75	153	4.59	173	6	6.6	24.05	19	50.1	10.38	1.4	63	5.36	4.34	137.4	4.9	1.16	2.84	1.71	0
1	45	2	1	1	0	0	0	30	176	75	83	97	0.85	0	0	0	1	1	0	0	24.21	122.5	75.5	176	4.81	247	5.8	7.2	39	26	44.7	31.16	7.33	91	5.4	4.16	141.7	5.29	0.87	4.33	0.94	0
1	45	3	1	0	0	0	0	30	167	77	90	102	0.84	0	0	0	2	1	0	0	27.6	126	75	163	6.07	203	5.7	5.9	54	28	48.5	11.3	2.1	88	5.46	3.73	138.8	4.25	1.7	2.36	0.8	0
1	45	3	1	1	0	0	0	30	183	84.3	90	98	0.92	0	0	0	1	1	0	0	25.17	122.5	74.5	158	4.43	176	5.8	5.6	22	22	47.9	21.12	2.6	82.2	9.17	4.41	138.5	4.12	1.31	2.02	1.28	0
1	45	3	1	1	1	0	0	30	175	83.3	81	94	0.86	0	0	0	1	1	0	0	27.2	133	83	159	7.06	207	5.7	6.3	33	24	47	13.48	3	67.3	3.77	3.94	137.7	4.85	1.25	3.5	0.94	0
0	45	3	1	1	0	0	0	30	166	91.5	86.5	99	0.87	0	0	0	2	1	0	0	33.2	127.5	77	154	4.69	205	5.9	6.3	44.4	32	49.1	10.5	1.4	60	4.01	3.74	140.9	5.53	2.27	3.43	1.41	0
1	45	3	1	1	0	0	0	20	178	71.6	86	98	0.87	0	0	0	2	1	0	0	22.59	125.5	77	161	10.37	308	5.4	5.9	37.53	29	46	10.5	1.8	72	4.13	4.85	139.8	5.43	2.11	3.07	1.33	0
0	45	3	1	0	0	0	0	0	164	62.2	87	104	0.94	0	0	0	2	1	0	0	23.12	121	74.5	131	6.34	201	5.7	6.2	12	13	46.3	10.1	1.2	49.08	5.24	4.34	140.5	4.63	1.24	2.79	1.25	0
0	45	3	1	1	0	0	0	30	164	59	71	89	0.79	0	0	0	2	1	0	0	21.93	120.5	79	129	6.21	192	5.8	5.8	56	20	47.5	9.9	1.7	51	6.99	4.76	138.5	5.86	1.15	4.4	1.37	0
1	45	2	0	1	0	0	0	30	175	86	89	102	0.87	0	0	0	2	1	0	0	28.08	123	75.5	131	8.16	269	5.9	6.5	23	15	46.9	12.31	1.66	53.2	5.77	3.53	130.4	3.24	1.28	1.2	1.37	0
1	45	2	1	1	0	0	0	20	176	72.8	76	94	0.92	0	0	0	1	1	0	0	23.5	122.5	66.5	161	7.1	317	5.6	7.2	29	26	44.7	6.46	1.56	100	6.12	3.96	140.4	6.69	2.49	4.61	1.2	0
1	45	3	1	1	0	0	0	30	176	96.5	105	120	0.87	0	0	0	1	0	0	0	35.945	129	77	156	5.84	216	5.3	5.4	37	32.81	51.3	10.7	1.8	111	3.89	4.83	138.8	4.79	1.76	2.83	1.12	0
0	45	2	1	1	0	0	0	30	158	55	78	82	0.95	0	0	0	2	1	0	0	22.03	120.5	70.5	127	7.23	244	5.9	6.5	9	12	42.8	6.82	1.7	48	6.04	3.81	139	4.53	2.16	2.32	1.37	0
1	45	3	1	1	0	0	0	30	169	84	98	105	0.93	0	0	0	2	1	0	0	29.41	121.5	77.5	151	5.84	221	5.7	5.9	29	24.04	48.4	16.1	3.14	78	4.93	4.21	141.4	2.33	1.24	2.52	1.29	0
0	45	3	1	1	0	0	0	0	160	53.8	76	87	0.87	0	0	0	0	1	0	0	21.01	122.5	66.5	129	7.23	261	5.6	6.2	14	18	46.3	12.5	2.56	78	4.62	4.03	139.7	7.37	0.94	4.78	1.66	0
1	45	3	1	1	0	0	0	30	182	85.05	89.5	106	0.87	0	0	0	1	1	0	0	25.67	130.75	83	160	6.88	230	5.9	6	43	32	51.3	14.36	2.01	87	4.45	4.29	137	5.44	1.7	4.1	1	0
0	45	3	1	1	0	0	0	30	167	62.9	72.5	94	0.775	0	0	0	1	1	0	0	22.55	135	86.25	137	5.24	233	6.3	7.1	33	34	49.8	13.9	1.5	59	5.18	3.96	140.8	5.01	1.21	3.14	1.86	0
0	45	3	1	1	0	0	0	30	165	60.8	83	95	0.87	0	0	0	2	1	0	0	22.33	123	75	124	5.7	305	4.92	6.2	34	19	46.1	8.57	1.2	82.2	4.51	3.83	139.4	4.35	0.9	2.52	1.76	0
0	45	2	1	1	0	0	0	0	167	64	88	96	0.91	0	0	0	0	1	0	0	22.94	129	77.5	115	5.73	269	5.3	6	25	22	48.5	8.1	1.22	54	3.78	4.29	139.5	6.61	1.9	4.1	1.46	0
1	45	2	0	0	0	0	0	30	162	72.9	80	90	0.88	0	0	0	1	1	0	0	27.775	131	78.5	148	7.85	163	5.3	5.5	30	21	50.1	17.36	1.2	60	6.45	3.77	140.7	3.83	2.05	1.68	1.07	0
0	45	3	1	1	0	0	0	30	160	56.1	80	96	0.9	0	0	0	1	1	0	0	21.91	128.25	74.25	133	4.92	236	5.2	6	30	28	48.07	14.76	1.85	65.2	5.77	4.31	138.6	6.33	1.55	3.63	1.9	0
1	45	3	1	0	0	0	0	30	179	82.7	81	90.5	0.89	0	0	0	1	1	0	1	25.805	124	76.75	158	7.67	265	5.7	6	43	27	48.4	16.03	2.39	58.5	5.02	4.46	137.8	4.1	0.83	2.96	1.14	0
0	45	3	1	1	0	0	0	60	172	70.8	83	96	0.86	0	0	0	1	1	0	0	23.93	134	74.5	142	5.08	353	5.3	6.5	19	15	46	8.01	1.4	55	4.01	4.12	138.4	6.17	2.43	4.4	1.03	0
0	45	3	1	1	0	0	0	20	169	74.9	80	90	0.89	0	0	0	1	1	0	0	26.215	126.75	74.25	126	6.2	231	6.4	6.6	57	36	41.8	14.63	2.2	53.51	5.02	4.57	137.1	5.9	1.5	3.74	1.5	0
1	45	2	1	1	0	0	0	30	168	65.6	78	90	0.87	0	0	0	1	1	3	1	23.24	125.5	74.5	145	9.93	248	6.2	5.9	19	18	46	9.2	1.7	75	3.3	3.72	140	3.41	0.93	1.82	1.25	0
0	45	3	1	1	0	0	0	30	165	57.75	80.5	94	0.855	0	0	0	1	1	0	0	21.21	128.5	77.75	135	4.08	237	5.2	6.4	35	32	48.36	7.56	1.7	61.4	4.38	4.09	138.9	6.79	1.5	4.41	1.81	0
0	46	2	0	1	0	0	0	0	160	77	86	94	0.91	0	0	0	0	1	0	0	30.07	130.5	79.5	142	7.16	225	5.8	6	20.48	21	44.7	7.9	1.1	38.4	4.25	3.96	138	5.22	4.28	2.46	1	0
0	46	2	1	1	0	0	0	0	160	82	85	94	0.86	0	0	0	0	1	0	0	32.03	120.5	79	153	7.08	382	5.8	7.8	24	17	47.9	7.8	2.07	56.5	6.01	4	141.5	6.3	2.02	4.34	1.2	0
1	46	2	1	1	0	0	0	0	175	67	80	90	0.88	0	0	0	0	1	0	0	21.87	120.5	74.5	145	7.21	178	6.1	4.5	23	20	49.8	25.61	3.56	83	5.99	4.3	142.2	3.74	0.99	2.38	0.95	0
1	46	2	1	1	0	0	1	30	175	72.6	82	94	0.87	0	0	0	1	1	3	1	23.7	122.5	75	155	8.64	164	6	6.1	22	20	44.7	15.8	5.08	75.4	5.23	4.8	140.3	4.28	1.06	2.55	1.39	0
1	46	2	0	1	0	0	0	30	160	65.6	78	95	0.82	0	0	0	2	1	0	0	25.62	124	73.5	154	6.56	159	5.4	5.4	15	16	49.1	17.76	5.51	63.4	5.37	4.21	134.5	4.15	1.24	1.86	1.56	0
0	46	3	1	1	1	0	0	30	168	75.2	78	96	0.81	0	0	0	2	1	0	0	26.64	128	78	162	5.77	195	6.3	5.6	60	32	49.8	20.2	2.2	42	7.14	3.73	140.6	5.1	1.85	2.8	1.3	0
1	46	2	0	1	0	0	0	30	180	70	80	90	0.88	0	0	0	2	1	0	0	21.6	122	71.5	154	6.79	149	5.8	5.6	23	19	47.7	7.92	1.2	53.6	6.37	4.79	139.8	3.91	1.32	2.57	1.14	0
0	46	2	1	1	1	0	0	30	151	52.05	75	97	0.77	0	0	0	1	1	0	0	22.825	133	78	136	4.22	164	5.7	5.7	54	41	46.2	14	1.8	62	5.33	4.21	142.6	4.85	1.27	2.63	1.6	0
0	46	2	1	1	0	0	0	30	158	80	92	102	0.9	0	0	0	2	1	0	0	32.04	121	71	152	6.37	235	5.9	6.5	37	30	46	11.88	1.42	65	4.81	4.33	139.3	6.39	2.7	4.15	1.09	0
0	46	3	1	2	0	0	0	0	162	71	86	94	0.91	0	0	0	0	1	0	0	27.05	126	75.5	136	4.37	193	5.6	6.5	20	17.94	47.6	7.3	1.2	55	5.48	4.42	139.7	4.21	1.57	2.91	1.04	0
1	46	3	1	1	1	0	0	0	180	80	82	96	0.83	0	0	0	0	0	0	0	24.69	127	74.5	154	11.21	202	5.6	6.2	31	22	51.3	16.7	2.9	77	5.11	4.07	133.6	5.04	1.11	3.27	1.43	0
0	46	2	1	1	0	0	0	30	157	63.7	78	90	0.86	0	0	0	2	1	0	0	25.84	124.5	75	149	6.22	312	5.7	6.5	24	18	47.9	22.7	3.05	66	5.59	4.12	139.7	4.67	5.54	1.8	0.76	0
1	46	2	1	1	0	0	0	30	183	91.15	98	120	0.815	0	0	0	0	1	0	0	27.215	124.25	75.5	161	8.08	263	6	7.2	39	26	49.8	19.7	3.87	73	5.8	3.76	138	3.16	1.46	2.01	1.06	0
0	46	3	1	1	0	0	1	30	162	82.3	88	95	0.93	0	0	0	1	1	0	0	31.35	125.5	72.5	137	6.18	189	5.8	6.5	29	33.36	48.4	9.2	0.44	60.03	5.1	3.9	138.5	4.9	1.25	3.5	0.82	0
1	46	3	1	1	0	0	0	30	170	74.65	89.5	95	0.945	0	0	0	1	0	0	0	25.825	131.25	81.5	171	6.95	244	5.9	6.3	66	28	49.8	27.34	4.61	83.4	4.83	4.38	137.5	5.15	1.61	3.58	1.04	0
0	46	3	1	1	0	0	0	30	167	71.55	84	89	0.94	0	0	0	1	1	0	0	25.65	133.25	83.25	162	6.87	331	5.7	5.8	14	17	44.7	11.83	1.57	68.4	5.21	4.2	140.8	5.21	1.32	3.01	1.36	0
1	46	2	1	1	0	0	0	30	177	89.7	86	97	0.89	0	0	0	2	1	14	0	28.63	126.5	74.5	152	5.6	238	5.7	7.2	19	20	47.2	7	0.89	83.4	5.15	4.13	138.6	5.6	3.3	3.44	0.96	0
0	46	2	1	0	0	0	0	30	162	54.2	81	96	0.84	0	0	0	2	1	0	0	20.65	124	73	148	6.99	260	5.7	6.1	31	19	45.2	13.5	0.4	42	4.95	3.81	141.7	6.34	2.03	4.37	1.42	0
1	46	2	1	1	0	0	0	60	174	72	81	88	0.92	0	0	0	1	1	10	1	23.78	132	73	152	6.57	257	5.6	5.8	35	27	51.3	13.34	2.07	79	6.51	4.94	137	5.51	0.68	3.92	1.28	0
1	46	3	1	1	0	0	0	30	175	71	86	93	0.92	0	0	0	1	1	5	0	23.18	124.5	74.5	158	7.63	299	5.6	6.1	24	25	47.9	17.49	2.7	68.1	7.84	3.88	139.5	7.92	1.83	5.76	1.35	0
1	46	2	0	0	0	0	0	30	170	71.75	90	99	0.9	0	0	0	1	1	0	0	24.82	128	72.75	147	5.4	213	5.4	6.5	40	26	51.1	13.43	2.26	100.3	6.79	3.77	130.3	4.25	1.59	2.26	1.2	0
0	46	2	0	1	0	0	0	30	166	74.4	85	94	0.9	0	0	0	1	1	0	0	26.99	125	71.5	147	5.49	188	5.6	6	30	24.03	51.3	11.08	1.2	55.7	5.62	4.1	138.7	4.61	2.73	2.57	1.13	0
1	46	2	1	0	0	0	0	30	170	90.1	103	113	0.91	0	0	0	1	1	1	1	31.17	127.5	76.5	153	5.82	245	6	6.1	23	21.53	51.4	17.17	4.85	55	6.37	4.04	137.7	4.95	1.34	3.43	1	0
0	46	3	1	1	1	0	0	30	158	57.6	74	83	0.89	0	0	0	2	1	0	0	23.07	134	81	152	4.46	174	5	5.4	33	30	48.36	13.03	1.7	36.6	5.32	3.73	137.1	6.94	1.9	4.67	1.3	0
1	46	3	1	1	0	0	1	0	181	68	85	105	0.81	0	0	0	2	1	0	0	20.75	128.5	76.25	147	6.2	178	6.4	6	15	16	47.6	7	0.9	70	5.84	4.24	125.9	6.12	0.63	3.91	1.7	0
1	46	3	1	1	0	0	0	0	187	84.3	90	100	0.9	0	0	0	0	1	5	1	29.45	122.5	77.5	162	5.34	353	5.8	6.2	49.54	28.44	51.3	14.59	1.1	76.7	6.01	4.98	139.5	4.95	2.09	4.01	0.97	0
0	46	2	1	1	0	0	0	30	162	61.65	78	88.5	0.885	0	0	0	1	1	0	0	23.485	134.5	82.5	149	7.17	212	5.4	5.8	25	24	49.8	17.08	1.6	54.5	4.16	3.72	138.5	5.54	2.83	3.5	1.09	0
0	46	2	1	1	0	0	1	30	160	56.15	75	90	0.83	0	0	0	1	1	0	0	21.925	124.5	71	137	9.72	277	5.1	6.2	30	22	49.1	11.8	1.76	47	21	4.45	141.4	4.17	1.29	2.06	1.79	0
1	46	3	1	1	0	0	0	30	174	80	88	96	0.91	0	0	0	1	1	0	0	26.42	123.5	75.5	159	6.44	204	5.8	6.3	49.54	23	48.4	24.7	3.5	66	4.8	3.53	138.6	3.42	1.74	1.41	1.01	0
1	46	2	1	1	0	0	0	30	170	74.25	80	90	0.88	0	0	0	2	1	0	1	25.685	126	73.75	149	6.68	191	6.1	6.4	21	16	49.1	10.07	1.4	73.6	3.71	4.35	137.7	5.63	1.97	3.77	0.88	0
1	46	3	0	1	0	0	0	30	172	76.8	86	97	0.89	0	0	0	1	1	0	0	25.95	122.5	75	154	7.03	221	5.3	6.3	30	23	46	10.4	2.11	97	5.65	4.32	138.9	4.54	0.75	2.86	1.09	0
0	46	2	1	1	0	0	0	30	160	61.5	82	93	0.88	0	0	0	1	1	0	0	24.02	123.5	75	139	7	210	5.6	6	36	23	49	6.8	1.3	62.1	4.24	4.14	139	4.95	1.61	2.76	1.3	0
1	46	3	0	1	0	0	0	30	180	88.6	100	110	0.9	0	0	0	1	1	0	0	27.34	126	74.5	150	5.46	192	6.2	6.2	20	27	48.4	12.6	1.36	72	4	3.69	138.6	6.12	3.05	3.81	0.87	0
1	46	2	1	1	0	0	0	30	172	72.3	86	90	0.95	0	0	0	1	1	0	0	24.43	124.5	73.5	131	5.76	300	5.4	7.5	26	25	51	16.9	8.1	66.1	5.24	4.91	137	3.84	1.65	2.13	1.21	0
1	46	3	1	1	0	0	0	30	172	73.2	82	88	0.93	0	0	0	1	1	0	0	24.74	127.5	76.5	156	6.42	231	5.3	5.9	10	16	47.9	14.55	2.9	68	6.25	4.2	130.3	5.72	0.79	3.73	1.26	0
1	46	2	0	1	0	0	0	30	178	80	83	97	0.85	0	0	0	2	1	0	0	25.24	120.5	77.5	171	3.61	155	5.8	6.5	41	30	49.8	15.9	2.07	60	3.78	4.72	140	6.46	1.02	4.73	1.42	0
1	46	2	1	1	0	0	0	30	176	89	100	102	0.98	0	0	0	2	1	5	0	28.73	129	70.5	135	9.41	211	6.1	6.41	28	29	46.3	8.85	1.9	95	6.55	3.9	138	4.23	3.72	1.79	0.91	0
1	46	2	1	1	0	0	0	20	170	82.6	92	103	0.89	0	0	0	1	0	15	1	28.58	126	73.5	149	8.06	246	5.4	6.6	15	17	48.4	11.2	2.42	47.7	5.32	4.54	137	3.31	0.8	2.13	1.02	0
0	46	2	1	1	0	0	0	20	163	79.2	86	102	0.84	0	0	0	1	1	0	0	29.8	129.5	72.5	143	10.09	317	6.3	7.8	38	30	44.7	8.6	1.8	57.4	4.78	4.27	141	8.07	7.5	4.57	0.6	0
0	46	2	1	1	0	0	0	0	160	74.1	85	95	0.89	0	0	0	0	1	0	0	28.94	121.5	75.5	129	7.52	232	5.7	6.9	24	15	48.46	24.6	6.14	55.7	5.6	4.36	137	5.04	1.03	3.72	1.23	0
1	46	2	1	1	0	0	0	30	174	81	99	103	0.96	0	0	0	1	1	0	0	26.75	126.5	75.5	154	7.39	213	5.9	6	17.65	15	45.33	11.3	1.68	67.2	3.37	3.69	139.5	4.91	1.71	3.6	0.76	0
0	46	2	1	1	0	0	0	20	165	65.7	93	100	0.93	0	0	0	1	1	0	0	24.13	118.5	77.5	137	3.99	186	5.6	6.5	15	20	49.9	8.97	1.2	61.1	6.01	3.88	140.5	5.88	1.39	4.18	1.5	0
1	46	3	1	0	0	0	0	30	170	67.2	80	90	0.88	0	0	0	2	1	0	0	23.25	126.5	72.5	144	4.04	215	5.6	5.5	27	24	46.1	9.7	1.4	78.5	8.76	4.22	137.7	5.13	1.22	3.8	1.14	0
0	46	2	1	1	0	0	0	0	152	55.5	77	96	0.8	0	0	0	0	0	0	0	24.02	148	62.5	134	6.68	325	5.74	6.3	43	27	49.1	10.6	1.36	61.2	4.01	4.18	137.3	4.68	2.1	2.99	1.16	0
1	46	2	0	1	0	0	0	30	168	67.6	85	96	0.88	0	0	0	1	1	0	0	23.95	126	72.5	142	3.88	181	5.3	6.4	37	22	43.9	13.7	1.9	84.7	4.17	4	140.6	2.94	0.89	1.66	1.14	0
1	46	2	1	1	0	0	0	0	177	80	84	108	0.77	0	0	0	0	1	0	1	25.53	113.5	76	145	4.24	276	5.9	6.3	20	13	46.6	11	2.04	69.14	4.27	4.02	142.7	3.45	0.75	1.77	1.38	0
0	46	2	1	1	0	0	0	30	162	73.95	90	100	0.9	0	0	0	1	1	0	0	28.175	127	75	136	6.28	308	5.4	6.1	21	16	48.4	4.64	1.1	78	4.5	4.96	120	4.58	1.67	2.77	1.1	0
0	46	2	1	1	0	0	0	30	165	72.35	89	97	0.91	0	0	0	1	1	0	0	26.57	124.25	74.25	144	12.52	349	5.7	6.5	35	30	51.3	18.84	2.04	52	5.32	4.05	138.9	5.24	1.96	3.31	1.15	0
1	46	3	0	1	0	0	0	50	172	70.6	82	94	0.87	0	0	0	1	1	0	0	23.86	124	72	148	4.8	180	5.3	5.9	18	19	47.9	11	3	87.6	4.85	4.44	139	3.94	1.71	2.13	1.41	0
1	46	2	0	1	0	0	0	30	170	75.15	81.5	90	0.9	0	0	0	1	1	0	0	26	127	82	173	3.46	260	5.7	5.9	24	22	51.3	10	1.7	65.6	3.98	4.27	137.7	6.29	2.05	4.49	1.08	0
1	46	2	0	1	0	0	0	40	170	72.05	82	94	0.87	0	0	0	1	1	0	0	24.925	122.5	76.25	157	5.61	196	5.2	5.4	30	24	46.6	9.5	1.39	86	6.93	3.86	139.2	4.48	1.05	2.97	1.42	0
0	47	3	1	1	1	0	0	30	158	55.45	79.5	90	0.88	0	0	0	1	1	0	0	22.21	135.25	84.75	128	4.65	361	5.7	6.9	30	25	45.4	8.67	1.4	57	3.78	3.95	141.81	5.59	2.11	3.44	1.38	0
1	47	3	1	1	0	0	0	30	173	75	85	96	0.88	0	0	0	2	1	0	1	25.05	120.5	79	174	5.61	205	5.4	5.6	34	21.29	47.9	11.63	2.78	126	6.77	4.36	141.8	4.19	2.03	2.53	1.04	0
1	47	3	1	1	0	0	0	0	180	89	108	110	0.98	0	0	0	0	1	0	0	31.645	120.75	76.25	134	8.28	206	5.6	6	34	22	48.4	11.14	0.4	72.17	4.35	4.94	140.3	3.47	1.38	2.19	0.89	0
1	47	2	1	1	0	0	0	50	165	71.2	85	92	0.92	0	0	0	1	1	0	0	26.15	126	76.5	144	3.73	207	5.6	6.4	19	15	45.9	9.09	1.48	83	5.98	3.99	139.1	5.04	1.08	3.54	1.06	0
1	47	3	1	1	0	0	0	30	180	86.3	84	96	0.88	0	0	0	1	1	20	2	26.63	122	66.5	155	6.57	188	5.2	5.5	23	18	46.35	11.7	0.97	51.8	5.24	4.85	139.7	5.1	1.38	3.08	1.19	0
1	47	3	1	1	0	0	0	30	183	77.05	91	100	0.91	0	0	0	1	0	0	0	23.005	122.25	69.75	142	6.95	270	5.7	6.4	17	22	49.8	7.96	1.72	106	6.53	4.41	137.7	4.98	0.84	2.26	1.59	0
1	47	3	1	1	0	0	0	30	173	83.7	91	100	0.91	0	0	0	1	1	0	1	27.965	123.75	75.25	151	4.86	237	5.4	5.7	30	25	49.7	16.38	3.82	76.5	3.9	2.81	139.7	3.97	1.75	2.12	1.26	0
1	47	3	1	1	0	0	0	30	170	74.85	85	90	0.94	0	0	0	1	0	0	0	25.895	121.25	73.5	149	8.21	267	6.1	6.4	15	20	46.6	8.9	1.5	73	3.98	4.75	137.8	5.37	1.95	3.82	0.96	0
1	47	2	1	1	0	0	0	40	164	71.5	96	101	0.95	0	0	0	1	1	0	0	26.58	126.75	74.75	131	9.47	253	5.4	6	15.43	14	47	10.2	1.85	78	5.97	4.48	138.4	4.76	1.35	2.72	1.14	0
0	47	3	0	1	0	0	0	30	155	51.5	75.5	86.5	0.87	0	0	0	1	0	0	0	21.43	127.5	81.5	138	6.07	218	5.7	6.2	27	23	51.4	12.98	2.9	47	4.3	4.19	138.5	3.75	0.53	2.04	1.54	0
1	47	2	1	1	0	0	0	30	172	74.5	85.6	95	0.9	0	0	0	1	0	0	1	25.175	124	76.25	144	7.41	276	5.4	5.8	18	21	46	11.3	2.02	59	6.31	4.12	141.5	5.35	1.99	3.72	1.1	0
1	47	3	1	1	0	0	0	60	175	66.05	85	97	0.87	0	0	0	1	1	0	0	21.565	124.5	75.5	163	5.15	228	6	5.8	31	20	47.9	10.68	0.7	63.7	6.01	3.83	139.9	6.13	4.83	2.77	1.03	0
1	47	2	1	1	0	0	0	30	168	69	80	86	0.93	0	0	0	2	1	0	0	24.44	124	76.5	130	8.04	174	5.4	5.9	22	30	45.7	12	2.2	88.8	5.1	4.41	138.5	5.01	1.76	2.78	2.4	0
1	47	3	1	1	0	0	0	0	178	70.3	76	88	0.86	0	0	0	2	1	0	0	22.18	120.5	83	158	7.3	202	5.8	5.8	34	22	47.9	11.6	0.8	70.4	3.09	4.21	138	3.91	0.93	2.54	1.32	0
1	47	3	1	1	0	0	0	30	166	86.65	91	103	0.88	0	0	0	1	1	0	0	31.44	112.5	74.5	156	8.47	175	5.3	6	26	21	46.3	12.9	2.96	67.9	4.9	3.82	138.6	4.41	1.15	2.15	1.3	0
0	47	2	1	1	1	0	0	0	161.5	84.1	98	107	0.915	0	0	0	2	0	0	0	32.245	94.5	62	129	6.82	219	5.3	6.2	21	13	46.5	10.9	1.31	65.2	2.78	4.06	140	4.04	2.03	2.31	0.84	0
1	47	3	1	1	0	0	0	30	168	66.7	86	94	0.91	0	0	0	1	1	0	0	23.63	122.5	73	154	5.71	232	5.6	6.1	23	21	48.4	14.77	1.89	99	4.88	4.33	140.4	4.58	1.58	3.03	1.01	0
1	47	3	1	2	1	0	0	60	178	85	80	98	0.81	0	0	0	2	0	0	0	26.82	120.5	79	176	6.02	200	5.8	6	24	19	44.7	11.37	1.2	81	3.79	3.73	140.2	4.89	1.36	2.81	1.11	0
0	47	3	1	1	1	0	0	30	160	67	80	98	0.81	0	0	0	2	0	0	0	26.17	120.5	72.5	128	6.26	238	5.7	5.1	24.05	22.42	47.7	16.9	2.2	57.23	4.23	4.55	140.6	4.43	0.54	2.46	1.15	0
1	47	2	1	1	0	0	0	60	168	66.7	85	93	0.91	0	0	0	2	0	0	0	23.63	127	77	133	7.41	169	5.6	6	15	21	51	7.9	1.3	77.2	6.35	4.26	137.3	4.81	0.76	3.09	1.16	0
1	47	3	1	1	0	0	0	40	179.5	94.8	92	103	0.89	0	0	0	1	1	0	0	29.42	125.75	77.75	156	5.98	239	5.4	6.1	46	21	48.4	19	1.73	68	5.38	3.76	140	5.57	0.56	4.36	1.56	0
0	47	3	1	1	0	0	0	20	160	96	99	107	0.925	0	0	0	1	1	0	0	37.495	124.75	75.5	131	8.51	227	5.7	5.5	33	22.79	46.7	11.6	0.4	57.2	6.68	4	142.3	4.65	3.73	2.06	0.92	0
1	47	2	1	1	0	0	0	0	173	75.7	94	99	0.94	0	0	0	0	1	0	0	25.29	118.5	77.5	151	4.43	164	5.3	6.1	18	20	48.4	11.74	4.33	84.8	5.61	4.02	137.7	5.87	1.81	3.45	1.41	0
0	47	2	0	1	0	0	0	30	159	59.6	76	82	0.93	0	0	0	1	1	0	0	23.57	123.5	73.5	133	6.16	273	5.8	6.1	16	17	48.5	8.6	1.22	38	3.78	4.35	139.8	5.86	1.25	4.34	1.16	0
1	47	3	1	1	0	0	0	30	176	77.05	90	98	0.91	0	0	0	1	0	0	0	24.87	123.5	75.25	130	7.14	180	5.8	6	17	17	47.3	11.1	2.13	88	5.25	4.41	137.3	3.74	1.55	2.09	1.31	0
0	47	3	1	1	0	0	0	30	162	85	98	115	0.85	0	0	0	2	1	0	0	32.38	127.5	75.5	131	6.49	235	6.1	6.2	22	19	46	6.8	2.1	58.2	4.95	4.33	139.2	3.04	1.44	1.61	1.19	0
0	47	3	0	1	1	0	0	30	164	78	93	103	0.9	0	0	0	1	1	0	0	29	130.5	78	152	5.59	304	6	6.2	10	15	49.8	5.58	1.1	52.4	3.78	4.06	139.1	5.27	3.13	3.57	1.01	0
1	47	2	0	1	0	0	0	50	166	65.45	90	100	0.9	0	0	0	1	1	0	0	23.745	124.75	77	164	7.43	254	5.3	5.8	30.49	23	48.4	12.74	2.1	71.4	6.14	4	140.6	5.28	3.22	2.83	1.13	0
1	47	3	1	0	0	0	0	40	170	97	92	100	0.92	0	0	0	1	1	12	0	33.56	133	83	182	10.19	215	5.79	5.8	34	16	48.4	20.05	2.4	80.6	4.01	4.21	139	4.9	3.29	2.26	0.95	0
0	47	2	1	1	0	0	0	30	165	77.15	83	94	0.88	0	0	0	2	1	0	0	28.335	125.5	75.75	142	7.84	191	5.6	5.9	22	21.75	47.9	11.79	1.1	64.1	6.71	4.4	142	4.27	1.96	2.11	1.62	0
0	47	3	0	1	0	0	0	0	156	60.3	80	90	0.88	0	0	0	0	1	0	0	24.77	121.5	79	136	7.02	275	5.4	5.7	27	22	45.2	9.3	0.7	62.2	5.57	4.85	140	5.34	2.51	3.11	1.08	0
0	47	3	1	1	0	0	0	0	161	53.3	75	86	0.87	0	0	0	2	1	0	0	20.56	118.5	77.5	137	6.25	313	5.4	5.9	23	19.59	44	7	1.1	49	6.56	4.07	139.9	5.25	2.81	2.72	1.37	0
0	47	2	1	1	1	0	0	30	166.8	77.55	87	109	0.795	0	0	0	1	0	0	0	27.89	133.25	82.25	139	6.05	237	6	5.7	16.74	19	41.8	11.37	1.8	72	4.25	3.88	139.3	6.36	1.5	4.08	1.31	0
0	47	3	1	1	0	0	0	30	162	64.3	77	86	0.9	0	0	0	2	1	0	0	24.5	120.5	71	133	5.52	168	5.5	5.8	12	18	47.4	25.69	3.3	69	3.66	3.47	136.5	5.24	1.05	3.36	1.69	0
1	47	2	1	1	0	0	0	0	168	76.4	86	94	0.91	0	0	0	0	1	0	0	27.06	124.5	76.5	122	7.5	268	5.6	6.2	14	16	49.5	9.93	1.72	98.4	6.35	4.58	136.3	3.6	0.82	1.72	1.31	0
1	47	3	1	0	0	0	0	30	168	74.3	90	98	0.91	0	0	0	1	1	0	0	26.32	125.5	75.5	153	3.15	190	5.3	6.4	32	20	43.9	23.68	2.75	84	4.39	3.53	140.6	3.62	1.08	2.28	0.98	0
1	47	2	1	1	0	0	0	30	160	65	80	90	0.88	0	0	0	2	1	0	1	25.39	122.5	74	160	4.63	206	5.7	5.2	45	30	48.5	15.02	1.73	81	5.02	4.4	142	5.38	1.05	3.78	1.37	0
1	47	3	0	1	0	0	0	30	170	70.95	80	92	0.865	0	0	0	1	1	0	0	24.545	122.5	75.75	155	4.95	210	5.3	6.4	67	68	48.36	32.8	4.69	70.7	6.01	4.21	138.2	4.17	0.88	2.82	1.39	0
0	47	3	1	1	0	0	0	50	160	55.5	80	97	0.82	0	0	0	1	1	0	0	21.675	126.75	75	138	6.15	199	5.3	5.6	27	21	47	10.35	1.57	49	5.68	3.95	139.7	4.17	1.8	2.1	1.46	0
1	47	2	1	1	0	0	0	0	175	85	84	97	0.86	0	0	0	2	1	0	0	27.75	117.5	79	139	6.77	240	5.4	5.7	36	26	47.6	13.37	1.4	80	3.71	4	141.4	5.66	1.42	4.4	0.98	0
0	47	2	1	1	0	0	0	30	160	82.5	88	95	0.92	0	0	0	2	1	0	0	32.22	120.5	80.5	132	6.53	273	5.9	6.5	15	15	44.5	16.1	3.28	47.9	4.25	3.92	136.5	5.42	1.89	3.01	1.1	0
0	47	3	1	1	0	0	0	30	163	64	84	95	0.88	0	0	0	2	1	0	0	24.08	125.5	74.5	127	6.84	302	5.8	6.3	11	17	48.7	7.7	1.4	52	4.95	4.23	138	4.5	1.72	2.44	1.43	0
1	47	2	1	1	0	0	0	30	180	80	86	92	0.93	0	0	0	1	1	0	0	24.69	124	73.5	160	5.4	141	5.3	6.1	20	20	47.9	15.63	5.3	54	6.56	4.43	140.4	5.17	1.65	3.83	1.2	0
1	47	2	1	1	0	0	0	30	176	71.6	83	96	0.86	0	0	0	1	1	0	0	23.11	125	73.5	142	6.21	283	5.6	5.9	27	23	49.8	7.5	0.44	54	5.24	4.19	137.3	4.18	2.23	1.82	1.18	0
1	47	3	1	1	0	0	0	0	170	78	89	99	0.89	0	0	0	0	1	0	0	26.98	135	74.5	149	8.27	166	5.6	6	22	19	46.6	10.3	1.2	68	4.86	3.96	137.7	6.72	2.31	4.13	1.46	0
1	47	3	1	1	0	0	0	40	172	77.75	80	90	0.88	0	0	0	2	1	0	0	26.275	130	78.25	157	5.1	214	5.9	5.8	40	46	48.36	35.9	7.58	61	5.24	4.34	137.3	4.79	1.19	2.7	2.08	0
0	47	2	1	0	0	0	0	0	166	71.3	82	99	0.82	0	0	0	0	1	0	0	25.87	121	69	128	6.78	188	5.4	6.2	35	21	48.1	9.73	1.7	70	4.75	3.94	140	3.68	0.91	1.87	1.37	0
1	47	2	0	1	0	0	0	60	171	73.1	87	100	0.87	0	0	0	1	1	0	0	24.995	125	75.25	155	4.69	253	5.7	5.9	11	18	47.9	11.91	2.1	68	3.89	4.32	137.7	7.12	1.78	5.82	1.17	0
0	47	3	1	1	1	0	0	30	161	64.9	81	100	0.81	0	0	0	1	1	0	0	25.03	127	77.25	151	5.02	293	5	5.9	25	19	51.3	13.67	1.2	65.2	3.93	3.73	140	5.26	1.66	3.67	1.39	0
1	47	2	0	1	0	0	0	0	163	63.3	78	89	0.87	0	0	0	0	1	0	0	23.82	124.75	73.75	157	5.55	224	5.7	5.9	24	18	49.8	18.6	2.1	90.4	5.66	4.64	137.2	5.42	1.17	3.38	1.51	0
1	47	2	0	1	0	0	0	40	168	71.85	80	91	0.875	0	0	0	1	1	0	0	25.455	128	77.25	149	4.88	185	6.3	6.4	19	20	47.7	17.67	3.86	78.2	4.78	4.22	140	3.78	1.33	2.29	0.87	0
1	47	3	1	1	0	0	0	0	172	84.7	89	98	0.9	0	0	0	1	1	0	0	28.63	123	74.5	127	4.49	182	5.5	6.1	28	20	44.8	14	5.76	80.1	6.93	4.18	139.7	4.6	1.2	2.56	1.62	0
1	47	2	1	1	0	0	0	30	162	54	72	80	0.9	0	0	0	2	1	0	0	20.57	124.5	72	145	4.15	246	5.8	5.8	30	15	49.7	5.7	1.3	101.9	6.66	4	139.5	4.82	1.42	2.55	1.57	0
0	47	3	1	1	0	0	0	0	163	65.4	74	88	0.84	0	0	0	2	1	0	0	24.61	126	77.5	143	7.38	253	5.7	6.6	20	21	46	13.37	1.6	60.19	5.16	4.26	135.6	4.97	1.59	2.84	1.16	0
1	47	3	1	1	0	0	0	30	173	87	93	98.5	0.945	0	0	0	1	1	0	0	29.065	130.75	71.25	168	4.98	233	5.7	6.5	38	19	51.3	14	2.98	59	5.59	4.35	137.7	5.92	1.44	4.8	0.96	0
1	47	2	1	1	0	0	0	30	163	86.9	96	100	0.96	0	0	0	1	0	0	0	32.705	126	86.75	158	4.22	107	5.3	6.4	35	42	49.2	20.44	3.11	79.4	6.45	3.77	137.7	4.1	1.99	2.02	1.3	0
1	47	3	1	1	0	0	0	30	175	91.65	97	108	0.895	0	0	0	1	1	0	0	29.92	121.5	74.75	147	7.93	175	5.4	5.7	27	20	46.2	6.1	1.1	75.22	5.77	3.69	138.6	3.73	1.01	2.12	0.97	0
0	47	3	1	1	1	0	0	20	160	60.4	80	100	0.8	0	0	0	2	0	0	0	23.59	123	76.5	151	4.63	276	5.4	6.1	12	22	47.9	13.7	1.1	65.6	6.02	4.3	142.5	6.96	0.74	5.37	1.48	0
0	47	3	1	1	0	0	0	0	163	61	74	95	0.77	0	0	0	0	1	0	0	22.95	120.5	69.5	150	7.93	227	5.7	6	21	18.63	51.3	11.9	1.97	67.6	4.16	3.9	141.3	4.42	2.05	1.84	1.76	0
1	47	3	0	1	0	0	0	30	168	63.6	84	95	0.88	0	0	0	1	1	0	0	22.53	122	73	150	4.58	220	5.7	5.9	21	16	49.8	10.15	1.63	57	3.61	4.09	137	5.25	1.48	3.17	1.14	0
1	47	3	1	1	0	0	0	30	166	69.7	86	99	0.86	0	0	0	1	1	0	0	25.29	124.5	75.5	148	6.23	161	5.6	7.5	31	25	48.4	17.88	5.06	61	4.01	4.46	138.5	4.01	1.86	2.26	1.15	0
0	48	3	1	1	0	0	0	0	160	52	70	80	0.87	0	0	0	0	1	0	0	20.31	121	69.5	131	6.07	261	5.4	6.4	66	36	41.8	21.44	3.6	49	4.38	4.11	140.6	4.64	1.59	2.16	1.81	0
0	48	3	1	1	0	0	0	30	168	70	70	90	0.77	0	0	0	2	1	0	0	24.8	120.5	80.5	134	5.1	192	5.8	5.6	25	22	47.6	8.6	1.2	65	5.91	4.06	141.1	4.37	0.64	2.53	1.93	0
0	48	3	1	1	0	0	0	30	163	55.8	78.5	84.5	0.925	0	0	0	1	0	0	0	20.995	129.5	82.75	146	5.41	156	5.7	6.1	20	15	51.3	7.89	1.2	59.6	6.02	4.07	140.5	5.03	3.04	2.68	1.1	0
0	48	3	0	1	0	0	0	30	160	60	85	92	0.89	0	0	0	2	1	0	0	23.43	124.5	76.5	142	3.54	320	5.6	6.2	41.54	31	48.4	14.82	1.7	57.23	5.6	4.25	139.3	4.64	2.1	2.5	1.38	0
0	48	2	1	1	0	0	0	20	168	77.8	84	90	0.93	0	0	0	2	1	0	0	27.56	113.5	69	139	4.62	188	5.5	6	16	30	51.3	9.03	1.43	57	3.78	4.85	137.8	4.8	2.11	2.67	1.28	0
0	48	2	1	2	0	0	0	50	160	67.95	86	96	0.895	0	0	0	1	1	0	0	26.54	126.5	73.75	145	6.6	291	6.2	7	27	27	51.3	11.04	1.86	71	7.18	4.74	140.1	3.4	2.76	1.16	0.87	0
0	48	3	1	1	1	0	0	30	160	63.7	75	85.5	0.875	0	0	0	1	1	0	0	24.88	128	76.75	142	7.89	256	6.5	6.2	31	20	45.33	9.3	1.1	83.5	4.37	3.82	142.4	3.57	3.21	1.64	0.94	0
0	48	3	1	1	0	0	0	20	155	57.7	88	98	0.89	0	0	0	2	1	0	0	24.01	122.5	75.5	134	7.7	248	5.8	6.9	77	91	49.7	19.41	5.41	81.1	7.84	3.81	141.5	3.45	1.75	0.88	1.9	0
1	48	3	1	1	0	0	0	30	176	73.9	87	94	0.925	0	0	0	1	1	0	0	23.85	130.25	75.5	171	3.29	193	5.7	5.7	39	26.61	51.3	11.41	1.4	62.1	3.78	3.72	141.1	5.54	1.15	3.64	1.25	0
0	48	3	0	1	0	0	0	30	158	52.2	76	82	0.92	0	0	0	1	1	0	0	20.91	124	75	141	6.15	224	5.5	5.5	24.84	30	47.1	7.9	1.3	65.3	5	3.94	139.7	5.66	2.56	3.41	1.12	0
1	48	2	1	1	0	0	0	20	172	74.5	81	95.5	0.84	0	0	0	1	1	13	0	25.18	131.5	80	163	7.73	171	6.2	7.2	33	37	47.9	24.9	4.69	86	6.24	4.72	139.8	2.19	0.89	1.11	1.31	0
0	48	3	0	1	0	0	0	50	160	67.2	78	90	0.86	0	0	0	1	1	0	0	26.25	125.5	74	141	6.75	317	6.48	6.5	22	22	49.8	16.8	2.24	53	5.15	4.29	139.9	4.45	0.83	3.5	1.13	0
1	48	2	0	1	0	0	0	60	158	62.55	82	94	0.87	0	0	0	2	1	0	1	25.05	122.25	75.25	148	4.27	195	5.3	6.4	38	33	49.1	17.44	2.4	74.1	4.28	4.35	142.9	4.92	0.96	3.35	1.38	0
1	48	3	1	1	0	0	0	30	172	81.55	85	92	0.92	0	0	0	1	1	0	0	27.56	127.25	78.5	151	7.28	206	5.8	7.3	19	16	48.2	12.5	1.71	79.5	4.37	3.94	139	4.34	2.49	2.26	1.34	0
0	48	3	1	1	1	0	0	0	164	53.8	76	96	0.79	0	0	0	2	0	0	0	20	116.5	77.5	147	6.98	269	6	6.1	30	25	49.8	9.11	1.48	73	5.58	4.06	139.7	7.07	3.65	4.32	1.05	0
1	48	3	0	1	0	0	0	30	183	80	90	100	0.9	0	0	0	2	1	0	1	23.88	120.5	70.5	154	6.27	193	5.6	5.6	13	18	46	16.4	1.85	65.37	5.36	3.35	141	4.42	0.88	2.58	1.29	0
0	48	2	1	1	0	0	0	0	156	62.3	73	90	0.81	0	0	0	2	1	0	0	25.59	122.5	73.5	142	6.08	221	5.6	5.8	17	23.91	51.3	7.2	1.3	47	3.78	4.01	139.3	4.97	1.5	3.33	1.41	0
0	48	3	1	1	1	0	0	30	158	68.4	78	100	0.78	0	0	0	1	1	0	0	27.39	126	71.5	141	5.64	202	6.3	5.7	22	19	47.6	16.3	2.25	59.5	2.94	4.06	140	5.67	1.19	3.64	1.56	0
0	48	3	1	1	0	0	0	30	167	61	78	92	0.87	0	0	0	2	1	0	0	21.87	120.5	77.5	145	6.09	235	5.7	5.8	54	39	44.7	21.5	2.65	49.6	6.01	4.71	140.9	6.28	1.59	4.18	2.08	0
1	48	2	1	1	1	0	0	30	174	60.05	80	94	0.85	0	0	0	1	0	0	0	19.83	123.25	73	132	7.78	216	5.4	6	38	30	46.7	11.46	1.48	64	5.66	4.37	140	5.45	1.02	4.21	1.49	0
0	48	2	1	1	0	0	0	30	155	55.45	78.5	88	0.89	0	0	0	2	1	0	0	23.075	130.5	78.5	151	6.14	200	5.7	6	16	17	48.4	8.4	1.1	82.4	4.32	4.32	140.4	3.59	0.98	2.13	1.21	0
0	48	3	0	1	1	0	0	30	162.7	68	76	80	0.95	0	0	0	1	1	0	0	25.68	131.5	70	151	7.5	187	6.1	6.2	14	10	44.7	11.3	1.8	58.2	5.6	3.82	142.4	4.22	1.95	2.14	1.36	0
1	48	2	1	1	0	0	1	50	190	92.7	95	104	0.91	0	0	0	1	1	0	0	24.88	122.5	75.5	150	6.73	268	5.4	6.2	30	22	49.8	15.11	2.2	44.1	4.35	3.94	139.3	5.13	2.52	3.06	1.11	0
1	48	3	1	1	0	0	0	0	175	92.8	96	95	1.01	0	0	0	0	1	0	0	30.3	121	76.5	152	4.95	260	5.6	6.1	30	23	45.2	10.1	1.76	125.8	3.58	4.35	140	4.09	1.09	3.19	0.83	0
1	48	2	1	1	1	0	0	30	170	68.35	81	90	0.9	0	0	0	1	0	13	0	23.645	131.5	84.5	148	4.09	191	6.4	6	33	21	46	13.34	1.6	58.9	4.33	3.96	140.6	4.75	1.06	2.98	1.06	0
0	48	2	1	1	0	0	0	30	164	59.8	79	86	0.92	0	0	0	1	1	0	0	22.23	119	66.5	139	5.7	187	5.5	6.3	24	25	48.2	13.5	1.57	49.7	6.75	3.98	139.1	4.08	1.15	2.5	1.35	0
1	48	3	1	1	0	0	0	30	174	81.3	100	117	1.01	0	0	0	2	1	0	0	26.845	123.5	73.75	158	6.59	266	5.4	5.1	22	15	48.5	12.9	1.3	84.7	3.55	3.96	137.7	6.1	2.74	3.78	1.1	0
1	48	2	1	1	0	0	0	30	178	74.8	87	94	0.93	0	0	0	1	1	0	0	23.6	124	73.5	145	6.67	231	5.6	6.1	12	16	49.8	9	1.2	91.2	6.03	4.21	136	4.46	1.46	3.06	0.99	0
0	48	3	1	1	0	0	0	0	160	67.7	80	89	0.89	0	0	0	0	1	0	0	26.44	119	77	135	7.34	327	5.3	6.2	34	27.3	47.8	11.28	1.17	60	4.01	4.24	137.9	5.92	1.37	4.08	1.55	0
0	48	2	1	1	0	0	0	50	160	62	86	98	0.88	0	0	0	1	1	0	0	24.21	127	72.5	135	5.86	331	5.6	7.1	13.06	23	47.2	8.3	1.2	59	8.19	4.32	145.27	5.43	1.44	3.78	1.42	0
1	48	3	1	1	0	0	0	30	176	68.4	82	97	0.845	0	0	0	2	1	0	0	22.075	121.25	74.5	161	4.43	270	5.7	5.8	40	25	51.3	15.3	1.8	67	3.09	4.35	138.7	5.37	2.31	3.13	1.44	0
1	48	2	1	1	0	0	0	30	167	63.8	80	92	0.86	0	0	0	1	1	0	0	22.87	121.5	72.5	150	5.35	156	5.6	6	15.06	18	41.8	12.9	2.43	108.3	7.37	4.41	142.4	3.26	0.64	1.18	1.82	0
1	48	2	1	0	0	0	0	30	180	77.5	89	96	0.93	0	0	0	1	1	4	0	23.91	124	74.5	158	6.48	121	5.63	5.9	21	14	45.2	17.49	3.54	112	5.52	4.65	141.9	5.08	0.75	4.07	0.96	0
1	48	3	0	1	0	0	0	0	172	63.9	72	86	0.83	0	0	0	0	1	0	0	21.595	125.75	74.25	145	6.08	162	5.6	5.6	37	21	47.2	9.42	1.1	72.9	5.42	3.9	140	4.88	1.22	2.93	1.54	0
1	48	3	1	1	0	0	0	30	175	90.4	87	92	0.95	0	0	0	1	1	0	0	29.51	123.5	72.5	137	6.86	195	5.7	6	26	21	49.2	11.38	2.2	48.2	21	4.26	140.7	3.66	0.88	2.08	1.07	0
0	48	2	0	1	0	0	0	0	159	53.8	80	92	0.86	0	0	0	0	1	0	0	21.28	122	70.5	131	4.04	290	5.7	6.4	38	29	49.1	11.5	2.33	68.3	4.32	4.32	133	4.09	0.87	2.64	1.19	0
0	48	3	0	2	0	0	0	0	163	70	82	95.5	0.94	0	0	0	0	1	0	0	26.34	117	73	132	5.41	219	5.7	6.4	39	31	47.7	5.1	1.4	77	3.92	4.3	140.6	4.4	2.58	2	0.93	0
0	48	3	1	1	0	0	0	0	160	60.4	75	80	0.93	0	0	0	2	1	0	0	23.59	121.5	77.5	132	6	271	5.5	6.1	33	25	42.9	15.2	2.68	48.2	5.32	4.17	141	6.43	3.19	3.79	1.46	0
1	48	2	1	1	0	0	0	30	167	73	93	120	0.78	0	0	0	1	1	0	0	26.17	124.5	73.5	157	4.71	100	5.7	5.7	27	23	47.2	14.18	3	77	6.34	4.35	138.5	3.91	1.88	2.33	1.02	0
0	48	3	0	1	1	0	0	0	158	62.3	78	88	0.88	0	0	0	1	0	0	0	24.95	122	73.5	132	8.02	280	5.4	6.2	17	17	48.36	12.31	1.72	67.4	6.31	4.21	140.6	4.67	0.9	3.05	1.44	0
1	48	3	1	1	0	0	1	40	174	65.75	82.5	95	0.865	0	0	0	2	1	0	0	21.71	133.5	80.75	161	5.4	182	5.5	5.5	40	30	44.7	19	3.19	62	5.68	3.74	141.3	4.37	0.9	2.56	1.19	0
1	48	3	0	1	1	0	0	30	172	82.7	92	100	0.92	0	0	0	1	0	0	0	27.95	127	77.25	152	7.5	195	6.3	5.5	16	18	47.6	14.77	1.4	58	5.94	3.69	140	3.72	2.18	1.66	1.03	0
0	48	3	1	1	0	0	0	20	162.5	65.5	65	78	0.83	0	0	0	1	1	0	0	24.78	132	80	143	7.49	194	5.4	5.4	15	17	44.7	11.22	1.36	84	6.6	4.79	140.4	5.41	1.55	3.17	1.47	0
1	48	2	1	1	0	0	0	0	152	70	92	100	0.92	0	0	0	1	1	0	1	30.29	127.5	72	150	6.76	198	5.4	7.2	29	23	46.2	11.37	3.81	89	4.81	4.75	139.9	4.48	1	3.28	1.03	0
0	48	3	1	1	0	0	0	40	160.5	68.1	85	90	0.94	0	0	0	1	1	3.5	0	26.425	121.5	76.5	138	6.07	376	5.3	6.6	9	14	46.5	10.75	1.1	72.3	5.48	4.11	138.7	7.15	3.27	4.29	1.3	0
1	48	2	1	1	0	0	0	30	170	77.85	81	90	0.895	0	0	0	1	1	0	0	26.93	134.5	80.75	167	5.59	253	5.6	6.4	48	34	44.7	17.7	1.8	65.8	4.8	4.41	140.6	4.91	0.84	3.65	1.44	0
1	48	3	1	1	0	0	0	30	175	63.3	82	94	0.87	0	0	0	1	1	0	0	20.66	126	75.5	159	8.33	232	5.3	5.5	24	26.63	49.8	12.92	1.32	81.1	4.35	4.71	137.5	5.93	1.23	4.2	1.29	0
0	48	3	0	1	0	0	0	40	160.5	57.15	75	86	0.87	0	0	0	2	1	0	0	22.18	122.5	77	139	6.92	282	5.5	5.8	21	25	41.8	7.6	1.7	69.7	4.66	4.07	141.5	5.59	2.17	3.8	1.41	0
1	48	2	0	1	0	0	0	0	170	76.7	80	90	0.88	0	0	0	1	1	0	1	26.53	123	80.5	149	6.55	173	5.6	6	40.51	28	49	12.5	2.57	67	5.58	4.55	140.1	4.02	3	2.17	1.07	0
0	48	2	0	1	0	0	0	30	160	60.3	84	95	0.88	0	0	0	1	1	0	0	23.55	127	76.5	143	7.38	251	5.6	6.1	29	29	45.2	15.1	3.18	75.53	4.36	3.9	137.8	5.36	2.55	3.18	1.31	0
1	49	3	0	1	0	0	1	40	160	84.7	93	100	0.93	0	0	0	2	1	0	1	33.08	119	78	163	8.56	288	5.6	5.7	46	25	48.36	12.7	1.8	62	7.07	4.22	140	5.68	2.44	3.89	1.05	0
1	49	1	0	1	0	0	0	30	168	84.4	91.5	104	0.88	0	0	0	2	1	0	1	29.9	131.25	78.25	148	6.43	301	5.7	7.1	57	43	46.9	38.17	10.11	50	4.87	4	145.27	2.64	0.57	1.25	1.48	0
1	49	3	1	1	1	0	0	0	178	83.05	102	108	0.94	0	0	0	1	0	10	0	33.23	131	86	176	6.06	155	5.3	5.4	21	18	49.8	15.3	7.3	76.66	5.32	4.83	139.6	4.86	1.05	3.28	1.13	0
1	49	2	1	1	0	0	0	30	170	72.05	89.5	104	0.86	0	0	0	2	1	0	0	24.925	124.75	74.75	155	6.75	211	5.7	6.2	38	26	47	10.4	1.68	75.3	5.09	4.49	141.6	5.59	1.92	3.83	1.14	0
1	49	2	1	1	0	0	0	30	173	82.4	107	118	0.91	0	0	0	2	1	0	0	27.53	122.5	71	151	6.69	137	5.3	5.7	19.23	17	45.2	8.6	1.76	65	5.49	3.77	142.7	3.73	0.87	2.47	1.01	0
0	49	2	1	1	0	0	0	30	158	50.8	75	85	0.88	0	0	0	2	1	0	0	20.34	121.5	74.5	143	10.42	335	5.8	6.1	27	26	49	13.86	2.08	40.7	3.61	3.76	139	5.67	2.89	2.88	1.55	0
1	49	3	1	1	0	0	0	30	177	77.8	87	96	0.9	0	0	0	1	1	5	0	24.83	124.25	73.25	153	7.38	250	5.7	6	27	21	49	7.4	1.22	60.1	5.77	4.02	138.7	4.82	1.22	3.31	1.27	0
0	49	2	1	1	1	0	0	120	157	62.05	80	90	0.885	0	0	0	2	1	0	0	25.17	127.5	74.75	137	4.93	226	5.9	6.7	15.43	23	47.9	14.18	2.01	66.9	4.93	4.32	141.6	4.09	1.53	1.9	1.12	0
1	49	2	0	1	0	0	0	30	175	82.5	95	101	0.94	0	0	0	1	1	1	0	26.935	122.25	75.5	145	6.22	222	5.4	5.7	27	18	49.5	12.2	1.52	75.92	5.68	3.92	141.5	5.25	2.32	3.75	1.01	0
0	49	3	1	1	0	0	0	30	153	58.8	82.5	89.5	0.92	0	0	0	2	1	0	0	25.115	133	83.5	139	4.92	219	5.8	6.7	14	21	46.1	13.19	1.86	58	4.14	3.95	140	4.89	1.78	2.81	1.32	0
0	49	3	1	1	0	0	0	40	165	72.95	78	82	0.95	0	0	0	1	1	0	0	26.79	124	76.25	142	6.01	250	5.4	6.4	21	18	46	5.7	1.2	42	5.38	4.07	137.2	5.94	1.49	4.31	1.49	0
1	49	2	1	1	0	0	0	30	170	72.3	80	88	0.91	0	0	0	1	1	0	0	25.01	124.5	71.5	164	4.68	184	5.6	5.7	27	25	49.8	12.1	1.8	64	5.56	3.92	138.5	4.93	1.39	2.8	1.1	0
1	49	2	1	1	0	0	0	30	168	66.6	84	95	0.88	0	0	0	1	1	18	0	23.59	127.5	72.5	161	4.08	204	5.8	6.3	22	20	51.3	12.2	1.97	92.99	4.82	4.28	138.4	4.3	1.22	2.61	1.11	0
0	49	3	1	1	0	0	0	60	158.5	64.6	80	100	0.8	0	0	0	2	1	0	0	25.715	122.75	74	122	5.32	283	5.5	6.3	17	14.32	48	12.6	1.78	65.6	4.52	4.58	136.5	5.75	1.84	3.49	1.51	0
0	49	2	1	2	0	0	0	0	160	84.7	90	102	0.88	0	0	0	2	1	0	0	33.08	120.5	73	135	6.12	289	6	6.5	25	23	49	20.3	4.71	64	4.36	4.22	141.7	3.41	2.78	1.4	1.58	0
0	49	3	1	1	0	0	0	30	165	58	70	80	0.87	0	0	0	2	1	0	0	21.3	120.5	74.5	135	7.1	199	5.7	6	36	29	51	11.63	1.9	49.08	3.78	4.46	140.4	3.77	0.86	1.65	1.47	0
1	49	2	1	1	0	0	0	0	165	76.3	92	101	0.91	0	0	0	0	1	0	0	28.02	121.5	77	145	5.62	147	5.6	6.4	19	22	44.46	6.5	0.7	79.1	6.15	3.67	142.7	5.5	1.44	4.39	0.79	0
0	49	2	0	1	0	0	1	0	156.2	62.65	80	88	0.905	0	0	0	0	1	0	0	25.675	121.5	72	148	5.01	169	6	6.4	49	32	51.4	12.36	2.78	38	4.27	3.98	135	4.63	1.51	2.59	1.45	0
0	49	3	0	1	0	0	0	60	158	58.35	76	82	0.925	0	0	0	2	1	0	0	23.37	123.25	76.5	150	4.71	197	5.3	5.4	21	13	49	5.4	0.9	38	4.16	4.18	139.7	6.07	1.55	3.87	1.6	0
1	49	2	1	1	0	0	0	0	170	80	82	92	0.89	0	0	0	0	1	0	0	27.68	124	79	152	4.12	272	5.3	6.5	32	22	45.2	19.83	2.68	87.5	3.16	4.34	133.4	3.68	1.34	2.3	1.32	0
0	49	3	1	1	1	0	0	30	158	63.5	84	90	0.93	0	0	0	1	1	0	0	25.43	131.5	83.5	135	6.13	224	6.6	7.8	47	30	41.8	7.55	1.6	57	3.65	3.73	141	3.81	4.69	1.06	0.81	0
0	49	3	1	1	0	0	0	0	149	75	86	102	0.84	0	0	0	2	1	0	0	33.78	127	85	171	6.95	296	6	6.2	46	28	51.3	16.1	1.71	61.2	3.78	4.43	142.6	5.05	1.22	3.95	0.87	0
0	49	3	1	1	0	0	0	20	164	67.3	86	96	0.89	0	0	0	2	1	0	0	25.02	123	73.25	139	8.06	196	5.2	5.4	16	16	46.3	21.49	3.1	50.6	3.98	4.72	139.2	5.94	1.2	4.1	1.42	0
0	49	2	0	1	0	0	0	30	165	64.9	83	97	0.855	0	0	0	1	1	0	0	23.83	124	76.25	140	7.22	154	5.4	5.5	22	25	45.33	20.72	4.53	67.7	3.04	4.08	138.9	5.45	1.82	3.23	1.3	0
1	49	2	1	0	0	0	0	40	170	78.5	83	90	0.92	0	0	0	1	1	0	0	27.16	128	74.5	170	6.64	174	6.5	6.1	18	20	51.3	20.22	4.7	63	5.91	4.15	137.4	4.16	1.88	3.25	0.89	0
0	49	3	1	1	0	0	0	30	160	55.7	71	80	0.89	0	0	0	1	1	0	0	21.75	123	74.5	81	6.36	262	5.6	6	9	19	46.1	4.7	1.4	88	4.36	4.47	138.7	5.21	1.55	3.06	1.36	0
0	49	2	1	1	0	0	0	60	168	80.75	86.6	110	0.79	0	0	0	1	0	0	0	28.605	125.75	75.75	129	4.72	202	5.6	6.3	45	28	46.3	16.2	3.18	64.2	5.37	4.47	139.1	6.11	1.67	3.59	1.59	0
1	49	2	1	1	0	0	0	30	173	84.55	85.5	99	0.86	0	0	0	1	1	0	0	28.245	128.75	83.25	142	5.94	207	5.7	6.5	154.8	115	45.9	38.8	10.11	66	4.95	4.19	140.6	4.32	2.7	1.5	1.65	0
1	49	3	1	1	0	0	0	30	176.6	67.05	78	92	0.84	0	0	0	1	1	5	0	21.495	125.5	73.75	154	6.28	225	5.6	5.7	15	12	46	8.3	0.44	71.5	5.12	4.1	139.6	4.74	0.84	3.07	1.26	0
0	49	3	1	1	0	0	0	0	162.5	58.6	78	92	0.84	0	0	0	0	1	0	0	22.19	111.5	74.5	130	7.93	288	5.3	6.4	12	17	48	5.29	1.1	60	3.81	2.81	140.9	3.85	1.46	1.71	1.37	0
1	49	2	1	1	0	0	0	30	170	68.2	81	90	0.9	0	0	0	2	1	0	0	23.59	126	73.5	153	4.32	251	6	6.3	24	26	44.7	8	1.4	82.4	8.8	4.87	138.9	5.63	2.67	3.46	1.3	0
1	49	3	1	1	0	0	1	30	179	84.2	81.5	92	0.885	0	0	0	1	1	0	2	26.275	134.25	84.25	163	6.84	216	5.7	6.6	36	15	51.3	8.63	1.2	59	5.1	3.86	137.7	5.64	1.81	3.49	1.26	0
0	49	3	1	1	1	0	1	0	165	60.3	80	90	0.88	0	0	0	0	0	0	0	22.14	119	74	164	6.53	223	5.4	6.5	92	57	46	20.68	2.6	53	4.97	3.82	138.9	5.17	2.07	3.4	1.23	0
0	49	3	1	1	1	0	0	0	157.5	56.05	76	90	0.84	0	0	0	0	0	0	0	22.59	122.75	75.5	144	4.37	271	5.7	6.2	26	20	49.1	9.6	0.89	57.23	6.56	4.08	140.9	4.76	2.01	3.28	0.86	0
1	49	2	0	1	0	0	0	30	174	76.2	87	97	0.9	0	0	0	1	1	12	1	25.16	125	74	150	5.83	354	6	6.3	30	23	46.2	11	1	96	4.92	4.72	141.6	5.25	0.99	4.09	1.08	0
1	49	2	0	1	0	0	0	20	176	81.2	88	97	0.91	0	0	0	1	1	0	0	26.21	123.5	74	166	6.81	244	6.2	6.1	40	20	47.9	11.6	1.82	61.5	4.14	3.77	140.3	3.78	1.55	2.34	1.01	0
0	49	3	1	1	0	0	0	30	160	55	70	80	0.87	0	0	0	2	1	0	0	21.48	119	70.5	137	5.3	202	5.7	6.3	20	20	48.36	13.1	1.57	40.7	6.37	4.13	138.6	4.32	1.15	2.78	1.63	0
1	49	3	1	1	0	0	0	60	176	75.3	88	95	0.93	0	0	0	1	1	0	0	24.3	133.5	72	162	7.12	219	5.3	5.5	19	18	51.3	14.81	1.57	90	5.02	4.15	137.9	4.6	2.14	3.01	0.96	0
0	49	3	1	1	0	0	0	60	160	57.5	82	90	0.91	0	0	0	2	1	0	0	22.46	129	76	132	5.21	296	5.4	6.6	29	24	46.6	12.58	1.01	68.4	6.02	4.86	139.6	6.44	1.15	4.16	1.71	0
1	49	3	1	1	0	0	0	30	174	85.5	91	97	0.94	0	0	0	1	1	0	0	28.24	125	72.5	145	8.43	189	5.4	5.4	13	22	48	11.41	1.42	93.7	4.68	3.8	139.8	6.41	1.56	4.53	1.03	0
1	49	2	1	1	1	0	0	0	177	79.7	80	98	0.81	0	0	0	0	0	0	0	25.43	127.5	74	159	4.67	213	6	6	20.6	15	49.8	14.96	1.37	87.6	9.09	4	139.8	4.64	1.29	2.9	1.26	0
0	49	3	1	1	0	0	0	30	160	58.85	81	97	0.835	0	0	0	1	1	0	0	22.985	128.5	74	151	3.93	221	5.8	5.5	17	18	51.3	12	1.01	56.24	4.38	3.92	140.2	6.45	3.37	4.35	1.26	0
1	49	2	1	1	0	0	0	30	175	79	82	95	0.86	0	0	0	2	1	0	1	25.79	124.5	74	144	5.28	188	5.6	6	22	21	51.3	13.9	1.6	106	6.06	3.7	139.6	6.02	1.61	4.92	1.05	0
0	49	2	1	1	0	0	0	30	158	58.8	80	90	0.89	0	0	0	2	1	0	0	23.55	122.5	73	148	7.56	233	6	6.4	59	32.85	47.7	10.3	1.1	62.2	7.19	3.93	142	3.84	1.68	2.15	1.52	0
1	49	2	1	1	0	0	0	30	163	77.65	92	101	0.91	0	0	0	2	1	0	0	29.22	123.75	73.75	122	8.18	196	5.3	5.9	30	20	45	5.94	1.78	56	5.18	4.1	138.7	5.25	2.13	3.72	1.03	0
0	49	3	1	1	0	0	0	30	165.25	69.55	78	86	0.905	0	0	0	1	1	0	0	25.465	131.5	82.75	134	8.27	387	5.8	6.1	11	12	51.3	7.3	1.3	80.9	5.63	3.89	141.3	7.32	2.32	4.93	1.59	0
1	49	3	1	1	0	0	0	0	170	76	88	96	0.91	0	0	0	1	1	0	0	26.29	122.25	73.75	149	9.56	50	5.9	5.4	18.57	19	44.7	31.16	5.79	64	4.7	4.21	138	4.86	1.11	3.81	1.05	0
1	49	3	1	1	0	0	0	30	172	77.6	85	93	0.91	0	0	0	1	1	0	0	26.23	125	70.5	140	9.4	298	5.6	6.2	38	34	51.25	22.6	4.26	85	5.55	4.12	142.2	6.29	2.83	3.97	1.3	0
1	49	2	1	1	0	0	0	60	170	82.2	90	101	0.89	0	0	0	2	1	0	0	28.44	126.5	72.5	152	7.73	252	6	5.7	13.01	14	47.6	11.91	1.52	74.8	4.09	4.02	138.5	4.81	3.23	2.41	1	0
1	49	3	1	1	0	0	0	0	176	85	92	103	0.89	0	0	0	0	1	0	0	27.44	127.5	82.5	141	6.55	213	5.9	6.5	26	20.12	46.7	11.1	1.21	97.7	6.55	3.77	139.7	3.8	1.22	2.74	0.8	0
0	49	3	0	1	1	0	0	30	158	67.3	88	98	0.895	0	0	0	1	0	0	0	26.95	125.75	76.75	127	4.02	262	5.3	5.9	37	25	46.7	13.7	1.1	82.4	2.78	4.17	143	5.61	1.52	3.04	1.47	0
0	49	2	1	1	0	0	0	30	153.2	49.6	70	88	0.79	0	0	0	1	1	0	0	21.13	123.75	72.5	120	5.66	259	6.4	6.5	20	18	45.1	9.6	1.4	68.3	5.78	4.27	141.9	6.12	1.49	4.36	1.36	0
1	49	3	1	1	0	0	0	30	175	80.8	94	113	0.83	0	0	0	1	0	0	0	26.38	126	76.5	152	6.57	232	5.5	6.5	22	20.74	49.8	14.9	2.94	80	4.64	3.74	137.7	3.96	1.81	2.19	1.13	0
0	50	3	1	1	0	0	0	0	152.7	69.4	85	103	0.82	0	0	0	0	1	0	0	29.76	151.5	77	142	6.32	353	5.9	6.7	14	15	47.2	10.6	1.31	74.1	4.44	4.1	139.5	5.42	2.32	3.75	1.05	0
1	50	3	1	1	0	0	0	0	180	80.8	102	115	0.88	0	0	0	2	1	0	0	24.93	124	77.5	147	7.06	311	5.3	5.9	10	16	45.3	9.06	1.36	81	4.36	3.81	140	5.18	1.35	3.68	1.14	0
1	50	3	1	1	0	0	0	30	168	73.5	80	80	1	0	0	0	2	1	0	0	26.04	126	75	142	6.98	258	5.7	6	18	23	46.2	22.1	4.7	84.4	8.21	4.09	140.6	6.04	2.9	3.98	1.4	0
0	50	3	1	1	0	0	0	30	150	65	86	98	0.87	0	0	0	1	1	0	0	28.88	123	75	142	7.05	278	5.8	5.9	18	18	43.9	10.4	1.3	46	4.14	4.15	139	5.86	3.35	3.73	1.05	0
0	50	3	1	1	0	0	0	0	163	66.7	78	96	0.81	0	0	0	1	1	0	0	25.1	119	79	140	4.34	306	5.3	6.1	17	20	43.9	12.9	2.5	53	4.25	4.55	142.2	5.87	1.48	4.3	1.1	0
0	50	3	1	1	0	0	0	30	164	61	75	89	0.84	0	0	0	1	1	0	0	22.675	129.75	77	138	6.38	284	5.8	6.5	24	20	46.6	8.9	2.54	84	6.63	4.19	141.6	3.21	0.96	1.18	1.4	0
0	50	2	1	1	0	0	0	0	160	75.7	95	106	0.89	0	0	0	1	0	0	0	29.57	118	77.5	155	11.47	250	5.3	6.3	35	28	49.8	13.59	5	59.5	2.96	4.08	141.3	5.96	6.15	2.49	1	0
1	50	3	1	1	0	0	0	30	175	81.3	92	100	0.92	0	0	0	2	1	20	1	26.54	122.5	73	165	5.41	263	5.3	5.7	20	15	46.1	15.48	2.71	81	4.21	4.3	142.9	3.98	0.74	2.19	0.97	0
0	50	2	0	1	0	0	0	30	165	63.8	77	90	0.85	0	0	0	1	1	0	0	23.43	125	71	147	7.18	256	5.6	6.6	38	24	47.6	10.5	3.07	38	6.37	4.09	135	3.57	1.06	1.63	1.37	0
0	50	2	1	1	0	0	0	0	168	85.7	86	97	0.88	0	0	0	2	1	0	0	30.36	121	74.5	112	4.25	175	5.5	6.2	46	28	45.3	32.28	8.97	57.2	4.14	4.12	139	3.74	1.09	1.53	1.53	0
0	50	3	0	1	0	0	0	0	170	68.7	78	86	0.9	0	0	0	2	1	0	0	23.77	122.5	67.5	133	6.16	276	5.3	6	42	35.27	50.1	9.75	1.4	69.4	4.95	4.2	136.9	4.95	1.62	3.28	1.27	0
1	50	2	1	1	0	0	0	30	170	78.3	89	102	0.89	0	0	0	1	0	0	2	27.09	123.5	76.5	164	7.49	213	5.48	5.5	29	23	46	12.3	2.1	92	4.81	4.09	141.9	4.27	2.19	1.78	1.49	0
1	50	3	1	1	0	0	0	0	178	74.3	83	94	0.88	0	0	0	1	1	0	0	23.45	121	79.5	128	4.4	219	5.8	6.5	20	23.52	49.8	7.1	1.3	114	6.12	3.92	140.5	4.91	1.42	3.57	0.96	0
0	50	3	1	1	0	0	0	30	160	55.1	80.5	92	0.875	0	0	0	1	1	0	0	21.52	130.25	80.75	142	5.4	299	5.7	5.7	15	19	49	11.18	1.28	47	16	4.42	139.1	6.73	2.74	3.98	1.16	0
1	50	2	1	1	0	0	0	0	180	89.8	88	100	0.88	0	0	0	2	1	0	1	27.71	123	76.5	148	5.26	309	5.2	6	17	14	51.7	7.8	1.44	63	4.25	4.29	140.2	5.33	2.7	3.51	1.1	0
1	50	2	1	1	0	0	0	60	169	63.7	82	96	0.85	0	0	0	1	1	0	0	22.295	123.75	76.75	152	6.35	249	6	6.1	30	30	44.7	13.3	2	77.2	7.01	4.4	138.8	5.38	0.94	3.24	1.37	0
1	50	3	1	1	1	0	0	30	171	80	85	110	0.77	0	0	0	2	0	0	0	27.35	120.5	72.5	169	6.81	189	5.6	6.5	22	20	44.7	11.47	1	124	9.13	4.46	143	5.68	0.78	4.61	1.12	0
1	50	2	0	1	0	0	0	50	170	66.7	83	94	0.88	0	0	0	1	1	0	0	23.07	127	72.5	142	5.7	250	5.3	5.5	17	23	49.7	10	1.1	125.2	9.46	4.69	136.5	5.76	1.34	4.1	1.2	0
1	50	3	1	1	0	0	0	0	185	92.8	86	90	0.95	0	0	0	0	1	0	0	27.11	124.5	75.5	163	7.07	239	5.8	5.8	20	18	51.3	30.4	7.33	84	5.15	3.94	133.6	4.86	0.67	3.55	1.32	0
1	50	3	0	1	0	0	0	0	170	74.7	76	82	0.92	0	0	0	2	0	0	0	25.84	122	78	168	5.9	226	5.3	6	35.76	34.87	46	11.4	1.73	73	3.09	3.77	138.6	6.11	1.93	4.66	0.7	0
1	50	3	1	1	0	0	1	30	172	82.8	86	105	0.955	0	0	0	2	1	0	0	27.985	125.5	75.75	150	6.43	304	5.9	5.6	20	18	45.6	12.4	1.61	77.4	6.19	3.67	142.2	5.59	1.74	3.28	1.38	0
1	50	3	1	1	0	0	0	30	181	86.3	93	100	0.93	0	0	0	1	1	0	1	26.335	134.25	83.25	141	7	231	5.3	5.8	93	64	46	18.3	3.19	75	6.24	4	144.1	3.41	1.24	1.59	1.22	0
1	50	3	1	1	0	0	0	0	173	82	90	97	0.93	0	0	0	0	1	0	0	27.39	124.5	77	152	4.4	222	5.3	5.8	9	15	47.9	12.6	2.2	77	4.08	3.77	137.6	4	1.43	2.4	1.11	0
0	50	2	1	1	0	0	0	0	165	64	82	84	0.97	0	0	0	0	1	0	0	23.5	120.5	79.5	141	7.37	290	5.8	7	21	21	49.8	8.5	1.36	64.2	5.6	4.21	139.3	6.49	3.24	3.84	1.42	0
0	50	2	0	1	0	0	0	0	164	72.3	85	98	0.9	0	0	0	0	1	0	0	26.88	122	77.5	140	5.83	206	5.7	5.8	16.74	14	44	10.4	0.8	62.2	4.44	3.81	140.8	5.07	2.67	3.21	0.99	0
1	50	2	1	1	0	0	0	0	173	74.8	86	98	0.87	0	0	0	1	1	0	0	24.99	122	78	186	6.55	245	5.2	6.3	39	17	51.3	17.4	1.9	85.9	4.75	4	141.9	3.98	2.24	2.48	0.81	0
0	50	3	0	1	0	0	0	30	160	60.3	70	89	0.785	0	0	0	1	1	0	0	23.55	124.75	74.25	152	4.67	208	5.4	5.8	20	22	51.3	12	1.36	56.6	3.93	4.07	135.9	6.32	0.87	4.6	1.56	0
0	50	3	0	1	1	0	0	30	150	54.9	75	84.5	0.89	0	0	0	2	1	0	0	24.395	128	83.25	119	7.09	261	5.7	7.1	19	22	46.28	13.5	4.33	55	6.33	3.96	141.4	4.14	1.63	2.12	1.59	0
1	50	2	1	1	0	0	1	50	170	68.1	90	97	0.855	0	0	0	1	1	0	0	23.56	123.75	75.75	140	6.3	197	6.3	6.1	18	18	49	10.1	2.07	81	5.54	4	133.6	3.72	1.55	2.03	0.93	0
0	50	3	1	1	0	0	0	0	154	50.2	76	96	0.95	0	0	0	2	1	0	0	21.16	121	82.5	134	4.92	193	5.2	5.6	12	11	45.8	11.27	2.6	72	5.62	3.81	142.9	4.28	0.95	2.1	2.11	0
1	50	2	1	1	0	0	0	0	168	82.5	96	110	0.87	0	0	0	0	1	0	0	29.23	123.5	77.5	169	5.48	169	5.3	6.1	31	22	48.36	12.9	3.04	54.4	6.37	3.76	139.4	5.35	2.13	3.14	1.09	0
1	50	2	1	1	0	0	0	0	170	85	85	96	0.88	0	0	0	2	1	0	0	29.41	121	72.5	168	6.23	177	5.3	5.9	21.06	14	49.1	14.23	3.18	61.75	5.18	3.96	139.5	3.66	0.68	2.38	0.98	0
1	50	3	1	1	0	0	0	30	168	83.7	93	100	0.94	0	0	0	1	1	0	1	29.65	134	82.5	148	4.99	244	6.4	6.1	12	20	49.7	13.1	3.28	84	7.58	4.31	135.5	5.07	1.27	3.31	0.98	0
1	50	3	1	1	0	0	0	0	171	88.7	90	100	0.9	0	0	0	2	1	0	1	30.33	129.5	82.5	182	6.13	198	5.9	5.6	40	26	47.9	19.03	2.8	61.65	5.24	3.82	142	4.99	1.44	3.57	1.05	0
1	50	3	0	1	0	0	0	30	178	79.3	84	94	0.89	0	0	0	1	1	0	0	25.025	120.75	74	139	6.67	210	5.3	6	23.61	22	45.2	6	1.61	62.6	5.13	3.77	141.6	4.14	1.47	1.59	1.49	0
0	50	2	1	1	0	0	0	50	155	64.25	80	100	0.8	0	0	0	2	1	0	0	26.735	126.75	77	137	8.75	233	5	5.8	17.91	17	48.4	8.95	3.07	65	5.6	4.12	140.1	5.97	1.74	3.45	1.52	0
1	50	3	1	1	0	0	0	30	170	80	92	96	0.89	0	0	0	2	1	0	1	27.68	130	82	153	6.48	251	5.9	6.7	11	12	46	29.42	4.69	86.1	7.38	4.27	138.8	4.09	0.87	2.89	1	0
1	50	2	1	1	0	0	0	30	175	86.6	93	105	0.89	0	0	0	2	1	0	0	28.27	126	72.5	145	7.07	182	5.6	6.4	67	44	51.3	10	1.8	98.2	5.62	4.58	142.2	4.88	3.6	2.59	0.87	0
0	50	2	0	1	0	0	0	30	160	63	90	100	0.9	0	0	0	1	1	0	0	24.6	127.5	76.5	140	4.18	152	5.6	5.6	14	17	48.36	10.7	1.22	65.85	4.29	4.47	140.4	5.84	1.33	4.14	1.21	0
0	50	3	1	1	1	0	0	30	164.5	51.75	76	88	0.86	0	0	0	1	0	0	0	19.12	123.75	78.25	140	6.32	282	5.3	6.6	18	16	46.6	13.88	2.2	48.8	4.25	3.9	140	6.84	2.24	4.68	1.2	0
1	50	2	1	1	0	0	0	30	165	63.1	76	89	0.84	0	0	0	2	1	0	0	23.17	127.75	77	143	7.72	310	5.7	6.6	36	33	48.07	5.1	1.4	80.65	5.07	4.23	138.5	5.59	0.85	4.16	1.62	0
1	50	3	0	1	0	0	0	0	174	82	88	96	0.91	0	0	0	0	1	0	0	27.08	120.5	79	133	5.8	169	5.7	6.4	31	22.78	48.1	10.21	1.7	65.1	3.11	3.95	130.4	5.75	1.94	3.91	0.82	0
0	50	3	1	1	0	0	0	50	158	54.05	60	68	0.88	0	0	0	1	1	0	0	21.65	121.25	76	132	6.46	203	6.3	6.3	15	21	49.1	15.34	2.8	59.94	4.13	4	140.4	4.45	1.45	3.09	1.06	0
1	50	2	1	1	0	0	0	0	178	59.5	74	82	0.9	0	0	0	2	1	0	0	16.3	127.5	73.5	148	8.02	120	5.3	6.7	19	31	51	12.3	2.44	66	5.93	3.94	125.9	6.05	2.32	3.43	1.43	0
1	50	2	1	1	0	0	0	60	170	73.75	88	100	0.88	0	0	0	2	1	0	1	25.515	129.5	80.5	161	5.93	234	6	5.8	14	13	46	12.71	1.31	89	6	4.36	140.84	5.29	2.26	3.38	1.18	0
1	50	3	0	1	0	0	0	0	180	89.6	96	110	0.87	0	0	0	0	1	0	0	27.65	130	77.5	169	5.97	180	5.9	6	43	35	46.6	19.41	3.1	75.9	4.54	3.94	138.6	3.03	0.99	1.79	1.02	0
1	50	2	1	1	0	0	0	0	172	67	75	93	0.8	0	0	0	0	1	0	2	22.64	121	73.75	143	7.99	330	5.6	6	20	20	46	19.12	6.71	54.2	4.14	3.92	141.3	5.47	1.12	3.78	1.39	0
1	50	3	1	1	0	0	0	0	174	79	90	100	0.9	0	0	0	0	1	0	0	26.09	122.5	75.5	159	6.06	249	5.8	6.2	23.28	21	49.8	11.04	1	83	6.02	4.72	130.4	5.25	2.08	3.48	1.22	0
0	50	2	1	1	0	0	0	30	158	63	84	96	0.88	0	0	0	1	1	0	0	25.23	125.5	76.5	137	6.41	274	5.3	6.7	106	79	53.1	7.7	1.4	67	16	4.4	141.7	7.31	1.84	5.42	1.35	0
1	50	2	1	1	0	0	0	0	175	77.7	87	95	0.91	0	0	0	2	1	0	0	25.37	121	77.5	156	5.71	145	6	6	16	15	46	12.3	1.1	73.4	2.53	3.69	137.5	4.6	1.31	3.13	1.13	0
1	50	2	1	2	0	0	0	40	172.3	57.5	78	88	0.89	0	0	0	2	1	5	0	19.36	136	81	158	7.31	191	7.32	6.1	8	16	47.9	16.87	1.8	57.9	4.16	4.5	140	5.75	0.92	4.18	0.96	0
1	50	2	1	1	0	0	0	0	174	79.7	90	100	0.9	0	0	0	2	1	0	1	26.32	115.5	76.5	121	6.16	230	5.3	6.4	24	22	46.92	13.43	2.71	84	5.11	4.26	140.2	4.82	1.39	3.46	1.12	0
1	50	3	1	1	1	0	0	30	175	72.85	92.5	110.5	0.84	0	0	0	1	0	0	0	23.78	128.75	79.75	165	4.83	200	5.7	5.7	20	14	41.8	14.6	1.4	81	5.74	4	139.02	5.99	0.84	4.27	1.07	0
1	50	2	1	1	0	0	0	0	173	58.3	80	96	0.83	0	0	0	2	1	0	0	19.47	124.5	77.5	160	6.68	226	5.9	5.8	14	22	44.7	14.8	3.28	59	6.2	4.4	137	7.54	1.42	5.15	2.03	0
1	50	2	0	1	0	0	0	0	165	79.6	76	88	0.86	0	0	0	2	1	0	1	29.23	124	76.5	175	6.05	283	5.2	6.5	38	31	47.9	6.81	1.8	73.8	3.93	4.23	142	4.6	1.68	2.55	1.37	0
1	50	2	1	1	0	0	1	30	182	84	85	96	0.885	0	0	0	2	1	5	1	24.535	126	76.5	156	7.33	248	5.8	5.9	19	15	46.7	18.88	2.4	83	3.93	3.69	139.7	4.33	0.96	2.96	1.35	0
1	50	2	1	1	0	0	0	0	178	85.65	80	90	0.88	0	0	0	0	0	10	1	26.725	130.75	81.5	165	3.99	192	5.9	6.4	40	22	46	7.1	1.4	83.9	5.63	4.32	138.6	5.1	0.9	3.94	1.16	0
1	50	2	1	1	0	0	0	0	173	80.3	84	96	0.87	0	0	0	1	1	10	0	27.78	127	78.5	149	6.58	240	6	6.1	30	25	43.9	6.42	2.1	91.1	5.54	4.47	143	3.8	1.29	2.38	0.88	0
1	50	3	1	1	0	0	0	0	175	83.3	94	112	0.835	0	0	0	0	1	0	0	27.505	123.75	77	156	4.29	209	5.5	6.4	16	22	49.8	10.14	2.57	64.3	4.29	3.74	133.1	3.96	1.43	1.35	1.56	0
0	50	2	1	1	0	0	0	30	164	74	86	90	0.95	0	0	0	1	1	0	0	27.51	124	81.5	151	8.52	341	6.1	7	23.31	19	46	9.06	1.36	61.5	4.79	4.05	141.3	4.05	1.99	3.05	1	0
0	50	3	1	1	0	0	0	0	165	62.3	78	94	0.84	0	0	0	0	1	0	0	22.88	128.5	76.5	133	6.84	253	6	6	31.6	35	47.7	9.9	1.2	70.8	5.05	4.46	140.6	5.98	2.22	3.24	1.56	0
1	50	3	1	1	0	0	0	50	173	89.75	99	110	0.9	0	0	0	1	1	15	1	29.985	129.25	78	146	6.6	163	5.3	6.4	24	22	44.8	13.28	1.4	76.6	3.51	3.81	141.6	6.47	1.22	4.82	1.06	0
1	50	2	1	1	0	0	0	0	180	83	92	102	0.9	0	0	0	0	1	0	0	25.61	120.5	79.5	142	5.62	173	5.8	5.9	19.03	22	49	9.49	1.37	67.3	4.81	3.76	133.3	5.63	2.66	3.74	0.95	0
1	50	3	0	1	0	0	0	30	178	78.45	88	98	0.89	0	0	0	1	1	0	0	24.755	125.5	77	147	7.08	167	5.8	6.3	8	16	44.7	15.06	2.77	65	6.15	3.73	141.6	4.86	1.11	3.18	0.98	0
1	50	2	1	1	0	0	0	45	189.4	86.45	98	110	0.89	0	0	0	1	0	0	1	24.095	126	76.75	150	5.06	252	5.4	6.5	33	27	46	14.09	1.21	73.2	5.66	4.54	140.9	6.2	1.54	4.33	1.2	0
1	50	3	1	1	0	0	0	30	166	65.45	76	90	0.84	0	0	0	1	1	0	0	23.75	127.75	77.5	156	4.97	198	5.3	5.6	39	23	48.36	6.68	1.22	83	4.24	4.34	140	3.18	0.62	2.16	1.06	0
1	50	2	1	1	0	0	0	0	179	94.8	108	115	0.93	0	0	0	2	1	0	1	29.58	122.5	77.5	153	7.96	246	5.9	6.5	24	18	47.24	11.48	2.3	74	6.24	4.35	135.6	5.53	1.78	3.48	1.32	0
1	50	3	0	1	0	0	0	0	176	73.9	82	94	0.87	0	0	0	2	1	0	2	23.85	128.5	78	144	5.06	122	5.3	5.7	30	31	46.05	25.21	5.8	69.86	8.31	4.35	140	5.32	1.76	3.28	1.75	0
1	50	3	1	1	0	0	0	20	178	88.6	86	103	0.83	0	0	0	1	1	0	0	27.96	127.5	66.5	147	6.91	243	6.2	6.3	3	13	45.33	13.06	2.3	94.93	5.54	3.77	138.5	4.37	1.79	2.61	1.13	0
0	50	2	0	1	0	0	0	0	156	59.5	80	89	0.89	0	0	0	0	1	0	0	24.44	124.5	75.5	120	7.57	263	5.3	6.3	27	20	45.1	7.7	2.2	48.36	4.23	4.09	137.7	5.4	2.24	3.72	1.35	0
1	50	2	1	1	0	0	0	0	170	87.8	94	101	0.91	0	0	0	0	1	20	2	30.38	124.75	74.25	159	4.82	240	6	5.7	20	14	45.6	10.12	2.3	72.4	3.66	3.8	140.4	4.2	1.42	2.62	0.97	0
0	50	3	1	1	1	0	0	0	156	60.2	80	85	0.94	0	0	0	1	0	0	0	24.73	122	81	132	5.29	209	5.3	5.6	18	20	49.1	10.65	1.17	76.1	6.28	3.96	136.3	3.69	0.93	1.63	1.39	0
1	50	2	0	1	0	0	0	0	168	65	80	86	0.93	0	0	0	2	1	0	0	23.03	127.5	73.5	164	5.69	151	5.9	5.9	42	32	47.6	13.3	1.29	64	4.9	4	139.7	6.34	3.23	4.39	0.98	0
1	50	3	1	1	0	0	0	50	170	78.2	82	93	0.91	0	0	0	1	1	0	0	27.055	125	75.75	141	7.39	252	6.2	6.3	15.18	21	49.8	21.3	4.02	72.7	4.5	3.67	140.7	4.22	1.79	2.56	1.18	0
0	50	3	1	1	0	0	0	30	150	51.7	84	93	0.9	0	0	0	2	1	0	0	22.97	126	76	146	6.7	333	5.9	6.2	12	12	46.1	7.7	1.61	45.2	2.96	3.73	140.4	4.63	2.39	2.37	1.24	0
0	50	3	1	1	1	0	0	50	162	52.6	83.5	84	0.995	0	0	0	1	1	0	0	20.04	128.25	75.5	137	6.75	262	5.3	6.5	48	29	44.7	13.21	1.49	54	6.02	4.46	141	6.6	3.23	4.72	0.97	0
0	50	2	0	1	0	0	0	30	161	73.5	83	91	0.91	0	0	0	1	1	0	0	28.35	126.25	75.25	142	4.26	314	5.7	7.1	56	44	48.4	9.9	1.7	55.1	5.51	3.92	141.6	4.04	1.35	2.38	1.32	0
1	50	2	0	1	0	1	0	0	179	76.2	85	97	0.87	0	0	0	2	1	0	0	23.78	126.5	79	151	5.24	170	5.9	6.5	18	17	49.8	29.7	6.84	121.1	7.79	4.78	140.4	3.04	0.79	1.81	1.43	0
0	50	3	1	1	0	0	0	0	160	66	88	96	0.91	0	0	0	0	1	0	0	25.78	121.5	77.5	130	6.55	210	5.7	6.3	23	21	44.5	13.7	2.31	51.4	6.24	4.42	140.7	5.55	1.02	3.86	1.37	0
0	50	3	0	1	0	0	0	30	168	78	84	104	0.8	0	0	0	2	1	0	0	27.63	124.5	72.5	127	4.56	281	5.6	5.4	35	23	49.7	16.94	2.2	77.8	3.6	4.2	139.3	3.29	0.88	1.88	1.07	0
1	50	3	1	1	0	0	0	0	182	83	82	98	0.83	0	0	0	2	1	0	1	25.05	122	82	164	4.51	150	5.3	6.8	14	20	47.9	16.8	3.4	58	4.16	4.46	141	5.27	0.93	3.63	1.36	0
0	50	2	1	1	1	0	0	0	160	57.4	79	88	0.89	0	0	0	2	0	0	0	22.42	119	76	147	6.17	172	5.3	6.1	31	26	49	10.71	0.89	55	6.56	4.06	139.9	5.14	1.16	3.43	1.54	0
1	50	3	1	1	0	0	0	0	178	73	82	90	0.91	0	0	0	1	0	0	0	23.04	124	75	161	7	446	5.3	5.8	25	21	51.3	11.47	1.2	100	4.08	4.94	136.5	6.9	2.81	4.4	1.11	0
0	50	2	0	1	0	0	0	20	164	66.2	79	81	0.98	0	0	0	1	1	0	0	24.61	123.5	73.5	144	6.68	189	6.6	6.5	20	30	47.9	7.12	0.9	86.6	4.08	3.99	140.2	8.04	3.96	4.41	1.76	0
1	50	3	1	1	0	0	1	50	175	84	108	119	0.91	0	0	0	1	1	0	0	27.42	126.5	74	144	7.49	223	6.5	6.7	71	36	48	11.5	1.3	86	7.39	4.76	139.3	4.43	1.17	3.38	0.72	0
1	50	3	1	1	1	0	0	60	172	64.9	75	85	0.88	0	0	0	1	1	0	0	21.935	128.75	77.5	155	5.46	195	5.3	6	15	20	49.8	10.3	1.8	61	4.59	4.21	130.3	4.01	0.99	2.58	0.94	0
1	50	3	1	1	1	0	0	30	175	71.9	89.5	99.5	0.9	0	0	0	1	1	0	0	23.475	125.75	80.5	138	5.91	243	5.3	5.7	16	16	47.2	16.35	1.4	86.1	7.66	3.81	142.8	4.54	1.44	3.28	1.09	0
0	50	3	1	1	0	0	0	60	162	81	98	105	0.93	0	0	0	1	1	0	0	30.855	129.5	78.75	142	6.76	275	6.1	5.9	20	22	49.7	7.29	1.1	56.4	7.49	4.32	139	5.14	1.09	3.67	1.28	0
0	51	2	1	1	0	0	0	30	158	56	78	90	0.86	0	0	0	1	1	0	0	22.43	124	77.5	156	6.05	229	5.6	5.9	21	15	49	12.8	1.64	60.19	7.03	4.46	141	4.91	1.14	3.14	1.5	0
1	51	3	0	1	0	0	0	30	169	86.4	105	110	0.95	0	0	0	1	1	0	0	30.25	124.75	75.5	130	6.22	244	5.4	6	18	22	46.2	11	1.86	62	6.46	4.38	138.2	4.91	1.7	3.23	1.06	0
0	51	3	0	1	0	0	0	0	160	60.3	80	90	0.88	0	0	0	2	1	0	0	23.55	121	79	140	4.81	241	5.4	5.6	27	21	48.7	9.71	1.4	39.6	16	4.74	138.5	5.12	1.05	3.69	1.71	0
1	51	2	1	1	0	0	0	30	176	75.05	92	94	0.975	0	0	0	1	1	0	0	24.225	123.25	73	145	8.51	238	5.6	6.1	38	21	49.1	13.82	2.1	83.6	8.27	3.7	140.1	4.41	1.46	3.03	0.87	0
1	51	3	1	0	0	0	0	0	182	75.3	90	101	0.89	0	0	0	2	1	0	1	22.73	121	76.5	157	6.92	238	5.3	5.6	47	24	48.7	13.17	1.5	76	3.79	3.77	141.6	3.98	1.51	2.28	0.88	0
1	51	2	0	1	0	0	0	30	163	65.7	81	94	0.89	0	0	0	1	1	0	1	24.72	133	82.5	160	6.05	268	5.3	5.5	20	20	51.3	17.73	3.1	58	4.52	4.27	139.5	4.76	0.94	3.23	1.18	0
1	51	3	1	1	0	0	0	30	173.5	85.6	96	106	0.9	0	0	0	1	0	10	0	28.43	128.5	78	147	8.25	186	5.3	7.2	19	17	47.2	11.8	3.1	116	5.09	4.58	139.3	3.72	1.18	2.35	1.01	0
0	51	2	0	1	0	0	0	30	158	61.25	78	93	0.835	0	0	0	1	1	0	0	24.53	126.75	73	133	5.71	211	5.9	6	17	23	51.7	9.8	1.1	52	5.91	4.23	136.9	7.38	2.07	5.22	1.39	0
1	51	3	1	1	0	0	0	30	178	63.8	82.5	95	0.865	0	0	0	1	1	0	0	20.13	130.5	77.25	139	6.53	201	5.6	6.7	18	18	44.7	20.74	4.53	101.35	6.07	4.03	137.8	6.12	1.16	3.57	1.75	0
0	51	2	0	1	0	0	0	0	155	56.8	76	86	0.88	0	0	0	1	1	0	0	23.64	131	73.5	129	5.48	286	5.5	6.1	12	18	49.2	11.7	3.28	46	4.25	4.71	138.1	4.47	0.61	2.58	1.69	0
0	51	2	1	1	0	0	0	30	155	54	76	83	0.98	0	0	0	0	1	0	0	22.475	125.25	75.5	154	8.86	271	5.2	5.4	26	20	49	8.1	1.9	53	4.01	3.8	139.6	4.82	1.3	3.66	1.07	0
1	51	3	1	1	0	0	0	40	168	68.65	84	92	0.91	0	0	0	1	1	0	0	24.32	126.5	77	142	6.68	323	5.4	5.8	18	22	46.8	14.3	3.1	63.33	4.44	4.22	137.2	4.31	0.78	2.86	1.12	0
1	51	3	0	1	0	0	0	0	169	78.6	85	92	0.92	0	0	0	2	1	0	1	27.52	130.5	76.5	165	4.62	185	5.9	6	14	21	49	16.08	2.5	76.5	4.68	3.73	137.4	4.49	1.43	2.57	1.32	0
1	51	2	1	1	0	0	0	30	180	93.35	97	106	0.915	0	0	0	1	1	0	0	28.805	124	70.75	153	7.54	216	6.4	6.3	46	25	51.3	13.15	1.7	74	4.45	4.79	138	8.23	2.68	5.88	1.08	0
1	51	2	1	1	0	0	0	0	171	69.8	91	93	0.98	0	0	0	0	1	0	0	23.87	131	74.5	155	7.92	201	5.09	6.4	26	21	49.8	14	3.64	92	4.48	4.33	137.7	6.32	2.86	4.38	1.04	0
1	51	2	1	1	0	0	0	0	165	74.8	90	96	0.98	0	0	0	2	1	0	0	27.47	132	79	174	6.59	251	5.3	6.2	36	15	49.1	10.6	2.1	55	4.87	3.95	139.4	4.22	1.65	2.43	1.11	0
1	51	3	1	1	0	0	0	30	165	65.3	83	92	0.92	0	0	0	1	0	0	0	23.98	119	72	147	5.8	190	6	6.2	14	11	48.2	10.8	2	74	4.66	4.31	137.8	3.41	1.94	1.59	0.76	0
1	51	2	1	1	0	0	0	50	180	85.15	82	91	0.9	0	0	0	1	1	0	0	26.28	126.75	76.25	142	4.25	164	5.5	6.1	17	20	47.7	10.4	3	60	4.85	4.46	137.3	4.36	0.71	1.64	1.84	0
0	51	2	1	1	1	0	0	0	157	64.3	75	99	0.75	0	0	0	2	0	0	0	26.08	128	77.5	142	3.6	289	6	6.1	36	20.88	48.07	10.63	2.2	54	5.18	4.14	142.2	4.44	1.87	2.32	1.44	0
0	51	3	1	1	0	0	0	60	163	81.4	88	96	0.92	0	0	0	2	1	0	0	30.63	124	73	148	6.11	231	5.8	5.9	51	52	48.2	13.78	1.6	55.27	5.77	3.9	137.1	4.39	2.47	1.75	1.43	0
0	51	2	0	1	0	0	0	30	155	50.4	70	75	0.86	0	0	0	2	1	0	0	20.97	164.5	71	149	5.79	219	5.5	6	25	20	46	11.7	1.8	52	5.16	4.46	139.8	3.56	1.14	1.61	1.63	0
0	51	3	1	1	0	0	0	0	165	56.4	78	90	0.86	0	0	0	2	1	0	0	20.71	116	68.5	133	6.82	200	5.4	5.4	24	18	43.9	9.6	1.1	55	3.24	4.41	137.7	6.77	1.45	4.16	1.97	0
1	51	2	1	1	0	0	0	0	165	92.8	95	105	0.9	0	0	0	1	1	0	0	34.08	130.5	81.5	148	6.8	259	5.7	6.9	71	28	46.2	19.1	5.72	50	4.63	3.67	139.5	3.31	1.16	2.4	0.74	0
0	51	2	1	1	0	0	0	30	157	56.8	80	88	0.905	0	0	0	1	1	0	0	23.04	127.75	73	140	5.93	244	5.1	6.5	28	35	49	15.4	2.8	70	5.14	4.85	135.8	5.02	1.81	3.26	1.47	0
1	51	2	1	1	0	0	0	30	170	69.7	80	91	0.88	0	0	0	1	1	5	1	24.11	127	73.5	149	7.92	233	5.6	6.3	12	18	48	13.6	2.2	73	2.96	4.13	139	4.99	1.24	3.5	1.09	0
1	51	2	0	1	0	0	0	0	161	65.9	84	91	0.92	0	0	0	2	1	0	1	25.42	169.5	72	154	4.94	233	5.61	6.1	7	16	51.3	13.37	1.73	71.4	4.14	4.51	137.3	5.02	1.26	3.7	1.41	0
0	51	2	1	1	0	0	0	30	163	72	86	94	0.91	0	0	0	2	1	0	0	27.09	127.5	72.5	141	4.55	202	5.9	6.1	26	24	44.5	9.59	1.7	43.7	4.63	3.94	139.9	5.56	1	3.98	1.06	0
1	51	3	0	1	0	0	0	0	172	75.8	88	92	0.95	0	0	0	0	1	0	0	25.62	121.5	79.5	149	6.68	274	5.7	8	34	20	46.5	11.8	2.3	66.8	7.74	4.24	137	5.35	1.04	3.88	1.19	0
1	51	2	1	1	0	0	0	30	175	79	91	97	0.935	0	0	0	1	1	0	0	25.795	126.25	75.5	154	7.43	183	5.3	5.8	25	22	49.1	13.8	2.6	75.19	6.34	3.8	137.6	5.14	2.51	2.85	1.14	0
1	51	3	0	1	0	0	0	30	183	86.8	84	95	0.9	0	0	0	2	1	0	0	25.91	126.5	76.5	157	7.34	273	5.6	6.1	35.05	24	51.3	10	1.63	63	6.56	4.19	139.3	4.32	1.32	3.14	1.21	0
0	51	3	1	1	0	0	0	50	157	51.5	73	84	0.87	0	0	0	1	1	0	0	20.89	122	73.5	146	5.36	234	5.1	5.4	16	17	48.4	11.26	1.56	61	5.9	4.14	138.8	5.1	0.91	2.8	1.94	0
1	51	3	1	1	0	0	0	30	183	95.75	110	125	0.88	0	0	0	1	1	0	0	32.54	122.75	78.25	150	5.46	195	5.6	6	14	22	51.3	12	1.73	64.3	6.42	4.27	140.5	7.04	2.22	4.47	1.19	0
1	51	2	1	0	0	0	0	30	172	83	80	90	0.88	0	0	0	1	1	0	0	28.05	122.5	74.5	159	4.99	206	5.9	6.1	16	10	49	9.6	1.4	85.7	4.45	3.68	130.3	4.96	1.94	3.11	0.97	0
1	51	2	1	1	0	0	0	0	160	76.4	94	98	0.95	0	0	0	0	1	0	0	29.84	125.5	73.5	159	7.12	196	5.3	7.1	98	56	47.6	17.25	4.85	57	4.5	3.99	138.7	5.73	1.58	4.17	1.13	0
1	51	3	0	1	1	0	0	0	180	87.7	90	108	0.83	0	0	0	2	0	0	0	27.06	126	72.5	140	6.76	201	5.4	6.1	24	17	49	12	1.76	81	5.48	4.3	135	5.39	2.26	3.18	1.06	0
0	51	3	1	1	0	0	0	30	162	55.85	71	79.5	0.89	0	0	0	2	1	0	0	21.275	131	82	139	7.81	178	5.3	6.3	28	23	47.9	12.5	1.8	45.2	16	4.33	140.4	4.71	1.07	2.77	1.86	0
0	51	2	1	1	0	0	0	0	166	65.3	70	76	0.92	0	0	0	2	1	0	0	23.69	123.5	77.5	139	4.66	157	5.4	6.5	27	16	45.6	9.36	1.22	55	4.86	3.83	139.9	5.49	0.96	3.88	1.47	0
1	51	3	1	1	0	0	0	0	175	60	74	90	0.82	0	0	0	0	1	0	0	19.59	121	72	130	5.01	130	5.5	5.7	18	15.75	51.4	10.04	5.2	82.8	5.49	4.87	136.3	3.52	0.73	1.57	1.39	0
0	51	2	1	1	0	0	1	60	160	56.85	78	87	0.895	0	0	0	1	1	0	0	22.205	123	74.75	148	6.09	285	5.7	6	24	17	49.8	7.6	0.9	57	7.05	4.72	137.6	5.65	1.37	3.38	1.68	0
1	51	3	0	1	0	0	0	30	172	72.6	86	97	0.89	0	0	0	1	1	0	0	24.54	129	75	158	7.52	248	5.9	5.4	27	15	47.9	13.14	1.36	66.3	6.2	4.38	137.5	4.43	1.68	2.38	1.21	0
0	51	3	1	1	1	0	0	30	169.5	63.15	82	92	0.89	0	0	0	2	0	0	0	21.97	127.25	79	155	5.62	214	6.3	5.7	19	22	49.8	19.2	1.44	52	5.38	3.94	138.6	5.46	0.61	3.47	1.82	0
1	51	3	1	1	0	0	1	30	170	65.8	89.5	98.4	0.905	0	0	0	1	0	5	1	22.765	130.75	84.25	154	9.56	251	5.3	5.8	33	30	47.6	16.1	2.1	71	2.76	4.75	138.2	5.61	1.14	3.45	1.71	0
1	51	3	1	1	0	0	0	0	165	60.4	70	80	0.87	0	0	0	2	1	0	0	22.18	130	73.5	146	4.47	160	5.5	6	31	17	50.6	18.55	2.2	55	4.25	3.53	139	4.16	1.03	2.68	1.29	0
0	51	3	1	1	0	0	0	20	158	54.25	75	88	0.85	0	0	0	1	0	0	0	21.73	122.5	77	126	4.1	144	5.9	6.6	34	27.81	49.7	11.5	2.24	49	5.45	3.98	138	4.71	0.7	2.55	1.95	0
1	51	3	0	1	0	0	0	60	181	89.15	92	103	0.89	0	0	0	1	1	5.5	1	27.21	134	83	149	6.64	243	5.5	6.4	27	17.3	49	6.68	1.3	59.6	3.07	3.73	140.4	2.74	1.39	1.48	0.96	0
0	51	2	1	1	0	0	0	50	155	70	85	90	0.94	0	0	0	1	1	0	0	29.135	123.75	74.75	141	6.26	278	5.1	6	28	17	49.8	9.69	1.63	59	5.93	4.56	140.4	4.76	0.87	3.6	1.04	0
0	51	2	1	0	0	0	0	30	158	74.2	86	88	0.98	0	0	0	1	1	0	0	29.72	125.75	73.5	151	6.56	164	5.5	7.5	56	32	47.9	13.69	1.71	48	4.32	3.9	137.7	4.44	2.45	2.58	1.05	0
0	51	2	1	1	1	0	0	30	165	59	85	85	0.97	0	0	0	1	0	0	0	21.67	127.75	75	121	6.7	276	6	6.8	27	17	47.1	10.1	1.4	64	4.9	4.21	140	6.06	2.43	4.46	0.92	0
1	51	2	1	1	0	0	0	30	172	78.4	86	90	0.95	0	0	0	1	1	0	0	26.5	125.5	77.5	164	3.77	205	5.6	6	16	24	47.9	16.4	3.1	58.9	6.56	4.21	135.6	3.41	1.15	2.11	1.08	0
0	51	3	1	1	0	0	0	30	165	56.6	75	88	0.85	0	0	0	1	1	0	0	20.785	121.75	76.25	140	6.47	210	5.6	6.4	18	18.33	41.8	7.75	1.43	89	6.1	3.99	142	4.02	1.01	2.08	1.71	0
1	51	3	1	1	0	0	0	30	178	78	80	90	0.88	0	0	0	1	1	0	0	24.61	120.5	77	153	6.23	242	5.7	6	23.87	22.07	51.3	6.8	1.1	78.8	4.18	4.11	130.4	4.41	1.4	2.89	1.15	0
0	51	3	1	1	0	0	0	20	158	53	76	88	0.86	0	0	0	1	1	0	0	21.23	129	78	128	5.75	268	6.3	7.2	14	15	51.4	7.44	1.2	72.6	4.99	4.08	139.3	3.88	2.7	1.76	1.22	0
1	51	3	1	1	1	0	0	30	177	77.4	90	104	0.86	0	0	0	2	1	0	0	24.7	131	74	134	8.85	276	6	6.5	11	18	49.7	13.1	2.2	65	2.96	3.95	137.3	4.64	1.06	2.91	1.4	0
1	51	2	1	1	0	0	0	50	165	64.9	76	80	0.95	0	0	0	2	1	0	0	23.83	135.5	82.5	146	7.6	184	5.6	5.9	27	21.35	45.6	8.88	1.2	76.2	4.01	3.95	142.7	3.48	0.71	2.2	1.25	0
0	51	2	1	1	0	0	0	0	167	59.4	82	96	0.85	0	0	0	0	1	0	0	21.29	127	75.5	130	7.01	305	5.4	5.7	57	35	49.2	7.4	1.1	62.2	5.15	4.4	140	4.46	1.54	2.41	1.58	0
1	51	3	1	1	0	0	0	45	171	66.45	80	96	0.83	0	0	0	1	1	0	0	22.72	124	76	144	4.5	273	5.1	6.3	14	16	48.4	14.61	1.91	77	4.17	4.72	138.1	4.22	1.15	2.79	1.26	0
0	51	3	0	1	0	0	0	30	149	53.1	72	82	0.875	0	0	0	1	1	0	0	23.915	127.25	73.75	133	5.38	223	5.4	5.1	11	18	46.5	9	1.3	65	3.55	3.77	120	5.31	2.67	2.83	1.19	0
0	51	3	1	1	0	0	0	0	165	64.8	78	84	0.92	0	0	0	2	1	0	0	23.8	127.5	72	136	4.27	300	5.4	6.4	20	22	47.8	9.1	1.2	68.4	6.01	4.36	140.5	5.32	2.43	2.99	1.39	0
1	51	2	1	1	0	0	0	20	170	77.9	86	98	0.88	0	0	0	1	1	0	0	26.95	125.5	75.5	162	7.03	191	5.2	6	16.94	17	41.8	7	1.28	58	4.35	4.46	136.9	7.89	1.99	5.87	1.22	0
0	51	3	1	1	0	0	0	30	166.2	60.7	75	87	0.86	0	0	0	1	1	0	0	21.97	134	84.75	125	6.96	210	5.3	6	27	29	47.3	10	2.11	80.3	5.47	4.38	141.1	3.98	1.15	2.15	1.57	0
1	51	3	1	1	1	0	0	30	169.5	69	76	90	0.84	0	0	0	1	0	0	0	24.01	124	77	155	5.06	236	5.3	6	21	21	48.4	13.39	3.08	62.6	5.24	3.84	138.7	5.05	1.82	3.52	0.92	0
0	51	2	0	1	0	0	0	30	153	81.3	98	106	0.92	0	0	0	1	1	0	0	34.73	124.5	73	142	5.34	152	5.6	5.4	36	30	48.36	9.3	1.7	65.7	4.03	4.46	142.2	7.98	2.47	5.39	1.55	0
1	51	2	1	1	0	0	0	30	180	95.25	95	110	0.86	0	0	0	1	1	0	0	29.395	129.5	77.25	137	5.41	170	5.7	6	17	14	47.2	14.4	3.3	69	6.46	3.82	138.2	3.12	1.15	1.75	1.24	0
1	51	3	1	1	0	0	0	30	173	76	93	101	0.92	0	0	0	1	1	6	0	25.39	125	79.5	156	6.95	300	5.3	7.2	41	23	47.6	12.96	5.3	70.6	6.01	4.03	141.9	4.22	1.47	2.89	0.9	0
1	51	3	1	1	0	0	0	0	181	96.8	99	106	0.93	0	0	0	0	1	0	0	29.54	132	86.5	141	7.01	176	5.4	5.9	37	23.08	47.5	7	1.8	85	4.59	3.94	139.3	4.52	1.48	2.75	0.93	0
1	51	2	1	1	0	0	0	0	165	65.3	84	90	0.93	0	0	0	2	1	0	0	23.98	119	78	158	6.41	126	5.8	5.8	46	35	47.6	10.1	1.4	78	4.82	3.89	140.1	5.59	1.52	3.99	1.18	0
1	51	3	1	1	0	0	0	30	178	79.1	85	90	0.94	0	0	0	2	1	0	0	24.96	124.5	76.5	176	5.74	196	5.6	6	47	38	44.7	8	1.1	79.19	5.02	3.72	139.3	5.39	1.99	3.83	1.01	0
0	51	3	1	1	1	0	0	90	161.5	65.3	83	95	0.87	0	0	0	2	0	0	0	25.03	131.5	81.5	144	8.85	152	5.6	6.1	21	23	51.3	10.32	1.49	55.7	3.32	4.46	137.9	4.09	1.78	2.31	0.98	0
1	51	3	0	1	0	0	0	0	170	70.3	80	100	0.8	0	0	0	0	1	0	0	24.32	128	81.5	150	5.31	211	5.4	5.6	27	21	51.25	14.92	2.77	73.56	4.82	4.32	137.3	4.64	0.93	3.12	1.39	0
0	51	2	0	1	0	0	1	40	154	58.8	80	90	0.885	0	0	0	1	1	0	0	24.79	129.5	74	131	7.01	346	5.9	6.5	37	25	49.2	8.6	1.63	60.7	5.87	4.4	139.8	4.33	1.36	2.54	1.52	0
1	51	3	1	1	0	0	0	30	183	95.55	100	107	0.93	0	0	0	1	1	0	0	30.465	128.75	79.25	150	8.58	212	6	6.2	30	23.59	44.7	16.1	2.04	77	6.31	3.8	139.02	3.47	2.18	1.28	1.01	0
1	51	3	1	1	0	0	0	0	172	60.4	80	92	0.86	0	0	0	1	1	0	0	20.41	121	79	156	6.21	182	5.9	5.9	8	10	48.8	11.8	1.28	57	7.14	4.71	137	5.31	1.24	4.02	1.27	0
1	51	3	0	1	0	0	0	60	170	72.2	81	87.5	0.925	0	0	0	1	1	9.5	0	24.98	130.75	79.5	153	8.52	269	5.6	6.2	12	20	48.2	9.31	2.1	87	5.01	4.03	139.8	6.24	2.4	2.62	2.09	0
1	51	2	1	1	0	0	0	70	170	80.6	85	97	0.88	0	0	0	1	1	0	1	27.88	133	76.5	168	10.71	174	5.6	5.4	25	18.85	51.3	10.65	2.1	65	5.7	4.08	141.7	5.27	1.96	3.74	1.99	0
1	51	3	1	1	0	0	0	0	170	65	84	93	0.9	0	0	0	2	1	0	0	22.49	122.5	76	149	4.12	200	5.5	5.5	22	22	47.1	12.29	1.8	86.1	6.4	4.38	139.7	5.56	1.12	3.38	1.83	0
1	51	2	0	1	0	0	0	0	173	77.6	88	96	0.91	0	0	0	2	1	0	0	25.92	122	79	151	7.57	272	5.7	6.4	52	32	45.2	16.77	2.6	58	4.22	3.8	137	3.82	0.65	2.84	1.12	0
1	51	3	1	1	0	0	0	0	176	86	90	100	0.9	0	0	0	2	0	0	0	27.76	121	69.5	148	5.14	176	5.1	5.8	30.49	24	45.2	11.6	1.78	73.4	5.31	3.82	139	5.43	2.7	3.05	1.14	0
1	51	3	1	1	0	0	0	30	181	65.2	80	92	0.87	0	0	0	2	1	0	1	19.9	129.5	75	145	6.16	159	5.3	5.8	53	33	49.8	20.17	2.96	86.1	4.85	3.61	142.3	4.05	0.49	2.55	1.53	0
1	51	3	1	1	0	0	0	30	168	66	82	98	0.83	0	0	0	2	1	0	1	23.38	123.5	71.5	152	7.64	202	5.8	5.4	38	38	49.8	14.23	1.57	64.8	4.25	3.69	141.7	4.8	1.54	3.16	1.16	0
0	51	3	1	1	0	0	0	0	161	65.3	86	95	0.9	0	0	0	2	1	0	0	25.19	121.5	84.5	136	5.36	256	5.3	5.9	28	27	46.7	23.1	2.9	59	5.23	4.27	141.6	5.66	0.62	4.1	1.57	0
1	51	2	1	1	0	0	0	30	166	73.4	90	110	0.81	0	0	0	1	1	0	0	26.63	126	75.75	171	4.84	125	5.5	5.6	17	17	48.2	29.47	6.61	65	6.99	4.02	139	4.54	1.14	2.7	1.19	0
1	51	2	1	1	0	0	0	0	155	62.5	90	91	0.99	0	0	0	2	1	0	0	26.01	126	72.5	157	5.51	227	5.2	5.9	19	12	44.7	7.67	1.7	79	5.65	4.12	136.9	6.13	0.73	4.22	1.38	0
1	51	2	1	1	0	0	0	30	172.7	75.5	92	104	0.88	0	0	0	1	1	0	0	25.31	128	75.75	146	5	221	5.9	6.9	22	19	47.7	6.9	1.48	68	7.07	4.49	136.7	5.13	3.45	3.25	0.85	0
1	51	2	1	1	0	0	0	30	162.8	70.15	87	102	0.85	0	0	0	1	1	0	0	26.465	124	75	148	6.35	311	5.6	6.2	19	25	48.4	16.83	8.1	63.33	3.98	4.05	137.8	4.81	2.08	3.46	1.04	0
1	51	2	1	1	0	0	0	30	165	70	85	100	0.85	0	0	0	2	1	0	2	25.71	122	80.5	142	6.28	316	5.3	6.1	16	20.51	49.67	7.8	2.13	81.2	4.97	4.2	139	4.54	1.5	2.59	0.91	0
1	51	2	0	1	0	0	0	0	176	75.3	90	102	0.88	0	0	0	2	1	0	1	24.3	122	79	139	6.08	179	5.3	5.6	56	35	48.5	15.54	2.17	85	4.73	4.38	143	4.28	0.86	2.97	1.43	0
1	51	2	1	1	0	0	0	30	177.5	86.05	108	110	0.98	0	0	0	1	1	5	0	27.305	124.5	73.5	178	3.99	259	6.2	6.4	28	26	48.4	36.59	10.11	55	3.61	4.13	140.7	4.95	2.51	2.71	1.07	0
0	51	3	0	1	0	0	0	0	162	65.4	80	90	0.88	0	0	0	0	1	0	0	24.91	121.5	81	140	6.17	231	5.4	6.4	19	18	47.1	8.4	1.2	72	5.21	4.19	139.3	5.89	2.06	3.76	1.36	0
1	51	3	0	1	0	0	0	0	175	79.8	85	94	0.9	0	0	0	2	1	0	0	26.05	124.5	76.5	152	4.99	136	5.3	6.1	48	35	49.5	13.65	2.4	72	5.17	3.96	138.7	3.96	0.54	2.85	1.35	0
0	51	3	1	1	0	0	0	40	160	62.7	77	82.5	0.935	0	0	0	1	1	0	0	24.485	133.25	83.5	155	6.84	262	5.3	6	23	18	49.8	11.3	3	63.7	4.41	4.32	142	5.73	2.18	3.73	1.19	0
0	51	2	1	1	0	0	0	0	158	65.7	78	92	0.84	0	0	0	0	1	0	0	26.31	126.5	78.5	135	6.29	192	5.5	6.4	21	19	44.8	28.9	6.84	73	6.86	4.16	141.6	5.35	0.68	3.43	1.67	0
0	51	2	1	1	0	0	0	0	164	64.7	80	90	0.88	0	0	0	0	1	0	0	24.05	123	81	135	6.15	264	5.4	6	31	26	46.1	11.23	1.86	52.8	4.25	4.18	138.6	4.11	1.05	2.62	1.14	0
0	51	2	1	1	0	0	0	30	165	88	86	95	0.9	0	0	0	1	0	0	0	32.32	127	76.25	159	7.29	256	5.3	6.2	55	31	49.8	9.81	1.28	72	5.41	3.93	142.4	5.67	2	3.94	1.13	0
1	51	3	1	1	0	0	0	30	178	84.7	92	101	0.91	0	0	0	2	1	0	0	26.73	137.5	86	143	6.57	223	5.4	5.8	20	22	48.5	9.84	3.07	74	3.28	3.73	137.3	4.04	0.9	1.98	1.63	0
1	51	2	1	1	0	0	0	0	158.5	63.3	82	94	0.87	0	0	0	2	1	0	0	25.2	126	75	149	8.02	179	5.5	6	41	27	49.6	14.92	2.65	82.5	6.92	3.95	140.5	4.27	0.95	2.7	1.28	0
0	51	2	1	1	0	0	0	0	162	62.5	86	89	0.96	0	0	0	0	1	0	0	23.81	126	80.5	126	4.09	235	5.4	6.4	22	20	46.2	8.79	2.39	68.35	5.78	4.25	140.4	5.68	2.75	3.98	1.02	0
0	51	3	1	1	0	0	0	30	158	54.8	80	86	0.93	0	0	0	2	1	0	0	21.95	122.5	74	139	5.49	245	5.3	6.4	12	22	45.9	18.83	3.58	64.4	3.77	3.79	141.3	5.28	1.46	3.27	1.64	0
1	51	3	1	1	0	0	0	0	175	75.3	85	96	0.88	0	0	0	2	1	0	0	24.58	123.5	77.5	165	6.74	180	5.3	5.5	40	31.58	45.2	25.65	3.11	52.4	6.01	3.73	137.9	3.58	0.94	1.97	1	0
1	51	3	1	1	0	0	0	0	173	72.7	85	95	0.89	0	0	0	2	1	0	1	24.29	122	83.5	142	6.04	300	5.7	5.7	46	34	48.7	20.14	3.6	90.5	5.9	4.23	138.7	4.69	1.08	3.06	1.11	0
0	51	2	1	1	0	0	0	40	161	74.3	86	100	0.86	0	0	0	1	1	0	0	28.66	123.5	73.5	135	9.26	227	6.4	8.1	40.51	36	48.5	13.83	3.2	64	5.36	4.08	141.9	4.86	3	2.98	0.9	0
1	51	2	1	1	0	0	0	30	169	67.65	88	98	0.89	0	0	0	1	1	10	0	23.68	128	75.25	143	7.11	256	5.1	6	24.48	22	45.4	11.26	4.33	58	3.78	4.35	138	3.91	1.71	2.05	1.1	0
1	51	2	0	1	0	0	0	0	170	69.2	85	98	0.86	0	0	0	0	1	0	0	23.94	126.5	79	140	3.91	156	5.3	4.1	34	21	45.2	8.65	1.3	50.6	4.25	4.23	137.5	3.56	0.84	2.1	1	0
0	52	3	0	1	0	0	0	30	155	57.5	86	89	0.97	0	0	0	1	0	0	0	23.93	136	82.5	155	7.56	310	6.7	6.6	17	19	51.3	13	1.35	52.3	5.21	3.99	138.7	6.24	2.1	4.34	1.32	0
1	52	3	1	1	0	0	0	30	160	69	94	103	0.91	0	0	0	1	1	0	0	26.95	125.5	78	156	4.19	158	5.6	6.4	25	25	47.3	22.37	4.9	60.03	4.95	3.8	140.5	4.01	1.32	2.14	1.36	0
0	52	3	1	1	0	0	0	30	160	77	90	100	0.9	0	0	0	2	1	0	0	30.07	127.5	76	150	5.82	177	6	6.1	13.17	12	46.2	13.58	2.5	45.8	6.56	4.7	140.1	4.69	1.08	3.28	1.13	0
1	52	2	1	1	1	0	0	30	170	74.45	85.5	108	0.795	0	0	0	1	1	0	0	25.755	126.5	79.75	157	6.06	231	5.3	6.5	29	22	41.8	9.5	1.31	62.8	4.34	3.53	140.4	4.11	1.16	2.39	1.39	0
1	52	2	0	1	0	0	0	45	176	82.5	86	98	0.88	0	0	0	1	1	0	1	26.63	122	75	163	3.43	228	5.4	5.8	23	21	51.3	9.06	1.1	80	4.02	4.17	139.4	4.92	2.02	3.37	1.08	0
0	52	2	1	1	0	0	0	0	159	70	85	95	0.89	0	0	0	0	1	0	0	27.68	124.5	71	122	5.6	281	5.8	6.5	15.59	23	50.1	6.8	0.8	59	3.87	4.23	137.5	4.38	1.64	2.18	1.4	0
1	52	3	0	0	0	0	0	40	170	75	86	92	0.93	0	0	0	2	1	0	0	25.95	128	76	145	6.78	271	5.4	6	26	20	42.7	17.97	3.98	61	4.69	4.11	139.3	5.07	0.85	3.81	1.78	0
1	52	2	1	1	0	0	0	0	170	81	94	103	0.91	0	0	0	0	1	5	0	28.025	124	73.5	148	7.18	292	5.3	6.9	41	23.19	46.1	13.2	2.7	71.2	4.24	4.25	139.5	4.3	1.37	2.93	0.91	0
1	52	2	1	1	0	0	0	300	179.5	84.6	87	98	0.88	0	0	0	1	1	0	0	26.25	124	73.5	172	5.42	198	5.6	6.8	25.05	18	51.3	8.2	1.7	80.96	12.12	4.7	141.7	3.94	0.89	2.76	1.01	0
0	52	3	1	1	0	0	0	30	160	70.5	82	84	0.98	0	0	0	1	1	0	0	27.53	125	73	138	5.59	245	5.7	6.1	28	26	45.6	11.31	1.33	61	6.23	4.46	141.2	5.66	2.15	3.04	1.35	0
0	52	3	1	1	1	0	0	0	168	69	83	96	0.86	0	0	0	2	0	0	0	24.44	127.5	79	127	6.41	296	6	5.8	15	24	51.4	8.62	3	57	6.56	4.32	139.8	4.44	0.93	2.77	1.08	0
1	52	2	1	1	0	0	0	30	173	66	86	92	0.93	0	0	0	0	1	0	0	22.05	122	74.5	163	3.7	183	5.6	6.1	23	22.61	44.7	12.2	1.26	73	5.04	4.59	139.4	5.66	2.32	3.87	1.17	0
1	52	3	1	1	0	0	0	0	173	79.7	78	96	0.81	0	0	0	2	1	0	1	26.62	124	77.5	153	6.11	257	5.3	5.5	33	27	45.9	15.67	4.3	53.8	5.18	4.07	139.6	5.26	0.63	3.17	1.41	0
1	52	2	1	1	0	0	0	0	178	89.8	95	100	0.95	0	0	0	2	1	0	0	28.34	126.5	79	128	8.51	233	5.3	7.4	59	52	47.32	35	11.7	120	5.13	4.23	142.2	3.68	1.63	1.67	1.57	0
1	52	2	1	1	0	0	0	30	172	70.8	86	95	0.9	0	0	0	2	1	0	0	23.93	126.5	69	150	5.38	173	5.4	5.4	107	107	47.5	28.8	7.1	53	5.32	3.47	138.9	4.94	2.15	2.43	1.6	0
1	52	2	1	0	0	0	0	0	170	79.8	85	98	0.86	0	0	0	0	1	0	0	27.61	124	76.5	169	6.59	198	5.1	6.3	17	18	48.4	22.37	5.79	73	3.92	3.77	138.1	3.41	0.96	2.05	1.04	0
1	52	3	1	1	0	0	0	50	180	80.15	80	94	0.85	0	0	0	1	1	0	0	24.735	123	76	147	12.02	256	5.3	6	13.06	13	46	14.15	2.83	70.5	5.34	3.82	140	5.32	0.93	3.53	1.28	0
1	52	2	1	1	0	0	0	30	174.1	82.6	94	110	0.85	0	0	0	2	1	0	0	27.245	128.75	74.25	142	6.06	180	5.7	6	15	14	49.5	12.4	1.32	98.4	4.43	4.41	138.5	4.97	1.93	3.13	1.45	0
0	52	3	1	1	0	0	0	30	158	62.4	80.5	86	0.935	0	0	0	1	1	0	0	24.99	130.75	79.25	127	7.03	235	5.3	7	18	17	46.2	10.1	1.39	77	7.98	4.05	140.4	6.7	3.67	4.12	0.87	0
1	52	3	1	1	0	0	0	30	174	75.6	78	94	0.83	0	0	0	1	1	0	1	24.97	124	73.5	144	8.6	224	5.6	6	12	11	46.1	8.57	1.31	97	7.08	3.96	141.2	4.39	0.49	3.04	1.38	0
1	52	3	1	1	0	0	0	0	172	65.4	75	88	0.85	0	0	0	0	1	0	2	22.1	127.5	75.5	127	6.65	237	5.3	6.1	58	38	43.9	23.3	5.6	68.8	5.95	4.07	140.6	6.06	0.5	3.57	1.79	0
0	52	3	1	1	0	0	0	30	162	56	78	88	0.88	0	0	0	1	1	0	0	21.33	120.5	74.5	139	4.49	252	6.1	6.5	22	25	47.7	8.8	1.33	49	4.14	4.4	138.4	6.3	2.37	3.29	1.62	0
0	52	2	1	1	0	0	0	30	160	68.3	86	95	0.905	0	0	0	1	1	0	0	26.675	125.75	78.25	133	5.66	295	5.3	6.41	13	20.69	46.9	7.9	1.4	80.7	3.41	4.42	140.8	5.71	1.47	4.22	1.04	0
0	52	3	0	1	1	0	0	20	160	62.95	76	83	0.91	0	0	0	1	0	0	0	24.585	126.5	80.25	137	4.11	350	5.4	6.1	21.31	23	46.7	6.22	1.1	38.6	6.56	4.09	140	4.98	1.49	3.61	1.15	0
0	52	3	1	1	0	0	0	30	159.5	57.5	74	86	0.86	0	0	0	1	1	0	0	22.6	126.75	77.75	135	7.83	152	5.3	5.8	14	24	46.5	9.4	2.1	83	5.14	4.32	141.2	6.04	1.1	4.42	1.42	0
1	52	2	1	1	0	0	0	30	175	94.6	90	100	0.9	0	0	0	1	1	0	0	30.88	122	73	171	4.59	227	5.7	5.2	34	21	45.6	10.02	1	63.1	3.98	4.21	141.5	3.88	1.54	2.74	1	0
1	52	3	1	1	0	0	0	30	170	63.2	70	84	0.83	0	0	0	1	1	0	0	21.86	126.5	72.5	143	5.57	221	5.6	6.6	79	54	47.9	22.8	5.9	104	4.21	4.28	140.8	4.96	3.08	2.43	1.02	0
1	52	2	1	1	0	0	0	30	170	78.05	85	96	0.88	0	0	0	1	1	0	0	27	127.75	74	119	4.77	199	5.7	6.1	24	17	47.8	13.39	1.73	78	5.48	4.44	133.1	5.65	1.08	3.71	1.24	0
1	52	2	1	1	0	0	0	0	170	65.2	88	96	0.91	0	0	0	0	1	0	0	22.56	121	71	148	4.72	156	5.7	7.2	11	21	47.7	9.8	1.82	77.5	5.58	4.51	137.5	4.12	1.7	1.92	1.07	0
1	52	3	1	1	0	0	0	30	180	86.55	90	98	0.91	0	0	0	2	1	5	0	26.71	129.25	78.75	164	7.53	144	6	5.9	102	57	46.6	21.13	2.5	94.9	4.93	4.21	140	5.57	1.22	3.58	1.37	0
0	52	2	1	1	0	0	0	30	158	61.8	78	90	0.865	0	0	0	2	1	0	0	24.75	124.25	74	134	4.81	266	5.7	6.4	13	18.73	48.4	9.31	1.1	71	5.9	4.32	140.3	5.44	0.59	4.02	1.58	0
1	52	3	1	1	1	0	0	0	176	70.4	85	98	0.86	0	0	0	2	0	0	1	22.72	125	77.5	160	5.56	211	5.5	6.2	24	23	49.8	12.2	1.2	66	6.02	4.02	139.7	6.53	2.04	4.11	1.3	0
1	52	3	1	1	0	0	0	0	170	67.8	80	85	0.94	0	0	0	0	1	0	0	23.46	122.5	81	131	7.15	248	5.4	6.1	15	13	43.3	12.4	2.9	81.7	7.23	4.22	129	3.63	0.93	2.28	0.91	0
1	52	2	1	1	0	0	0	20	174	62.3	87	96	0.905	0	0	0	1	1	0	0	20.575	121	75.75	156	5.78	272	6	6.3	44	27	48.4	12.36	1.61	54.2	5.93	3.96	143	4.62	1.03	2.86	1.03	0
0	52	3	1	1	0	0	0	30	160	58.7	81	89	0.91	0	0	0	1	1	0	0	22.925	122.25	75.25	128	5.63	168	5.3	6	14	23	43.2	11.8	0.4	57.2	8.66	4.08	142.4	5.8	1.01	4.37	1.4	0
0	52	3	0	1	0	0	0	20	165	53.5	76	86	0.88	0	0	0	1	1	0	0	19.65	123.5	76	148	6.36	178	6.8	6.4	24	20	41.8	15.4	2.11	45.2	4.96	3.96	141.3	6.16	2.17	4.3	1.47	0
0	52	3	1	1	0	0	0	30	160	66.85	83	96	0.87	0	0	0	1	1	0	0	26.11	133.25	78.5	139	6.41	303	6.1	6.3	20.26	14	45.6	9.4	1.3	65.3	4.81	4.09	136.3	5.17	0.94	3.28	1.31	0
0	52	2	1	1	1	0	0	40	155	71.85	89	92	0.965	0	0	0	1	1	0	0	29.9	123	79.25	133	3.11	336	5.7	6.5	33	27	48.2	8.09	1.1	55	5.39	3.88	141.9	6.6	2.19	4.93	1.05	0
1	52	2	1	1	0	0	0	0	172	70.3	85	93	0.91	0	0	0	2	1	0	0	23.76	123.5	85.5	152	4.56	110	5.3	5.4	12	15	51.7	7.93	3	70	5.32	3.69	139.3	4.38	2.2	2.56	1.06	0
1	52	2	0	1	0	0	0	30	178	94.2	96	104	0.92	0	0	0	1	1	0	0	29.73	125	76.5	144	8.12	209	6	6.9	17	23	43.7	24.41	7.35	81	6.3	4.72	137.7	4.84	1.13	3	1.29	0
1	52	2	0	1	0	0	0	50	176	85	85	98	0.86	0	0	0	1	1	0	0	27.44	124	76	151	6.34	187	6.5	6.4	24	15	51.3	23.67	14.13	65	6.54	4.81	136.3	3.52	1.44	1.83	1.93	0
0	52	3	0	1	0	0	0	0	166	74.7	91	102	0.89	0	0	0	2	1	0	0	27.1	121	77.5	121	6.29	272	5.4	6.4	30	24	46	11.48	3.1	42	6.37	4.11	140.3	4.66	3.97	1.75	0.88	0
1	52	3	1	1	1	0	0	60	178	76.2	90	98	0.92	0	0	0	1	1	0	0	24.04	130.5	80.5	155	5.06	209	5.6	5.8	62	35	46	12.4	1.7	64.79	5.64	3.95	137.4	6.12	2.54	3.74	1.31	0
0	52	3	1	1	0	0	0	20	163	66	78	86	0.9	0	0	0	2	1	0	0	24.84	128	77.5	123	4.08	222	5.4	6.1	17	20	48.2	6.84	1.4	51.8	5.94	4.21	142.2	4.94	1.59	2.91	1.37	0
1	52	3	1	1	1	0	0	30	168	68	87	95	0.92	0	0	0	2	0	0	0	24.09	127.5	75.5	149	3.7	204	6	5.9	19.09	17	47.2	8.4	1.4	70	5.36	4.32	139.5	4.54	0.67	3.04	1.49	0
1	52	3	1	1	0	0	0	30	171.5	68.4	89	97	0.915	0	0	0	1	1	0	0	23.25	123.75	74.5	143	4.32	219	5.5	6.6	18	17	48.36	10	2.01	73.6	6.2	4.13	138.7	3.65	0.66	2.32	1.32	0
1	52	3	1	1	0	0	0	40	180	79.7	89	99	0.9	0	0	0	1	1	0	0	24.59	127	76.5	148	6.73	243	6.4	6.2	39	49	47.9	18.9	5.06	79.4	4.85	4.5	138.7	4.66	1.07	2.49	1.29	0
1	52	2	1	1	0	0	0	0	167	75.3	82	98	0.83	0	0	0	2	1	0	1	26.99	129.5	77.5	164	7.71	208	5.3	5.6	33	23	46.5	11.98	2	60.1	4.61	4.11	139.3	6.45	0.94	4.41	1.55	0
1	52	3	0	1	0	0	0	30	184	76.2	82	94	0.87	0	0	0	1	1	0	0	22.5	122.5	75	152	6.11	252	5.3	6	15	18	47.9	11.6	1.76	82	7.12	3.88	139.3	4.54	0.88	3.78	1.13	0
1	52	3	1	1	0	0	0	30	175	70.65	87	98	0.885	0	0	0	1	0	5	0	23.065	122.5	73.25	148	5.52	309	6.2	6.2	12	15	47.7	14.39	2.58	75	4.42	4.77	134	5.29	0.6	3.18	1.35	0
0	52	2	1	1	0	0	0	0	153	58.3	84	96	0.87	0	0	0	2	1	0	0	24.9	127.5	81	140	5.8	175	5.8	6.1	39	36	47.5	15.4	2.58	75.5	6.68	4.38	143	5.66	1.25	3.18	1.68	0
1	52	2	1	1	0	0	0	0	170	82	82	92	0.89	0	0	0	2	1	0	0	28.37	133.5	73.5	153	8.38	190	5.3	6	28	26	44.7	6.78	1.49	72	5.8	4.26	139.5	5.54	1.95	3.97	1.3	0
0	52	3	1	1	0	0	0	30	162	64.4	80	92	0.86	0	0	0	2	1	0	0	24.535	124.5	78.75	135	6.89	285	5.3	6.9	27.34	24	48.36	6.68	1.4	52.3	5.6	4.54	142.12	6.73	2.89	3.85	1.37	0
1	52	3	1	1	0	0	0	0	170	64.1	83	92	0.9	0	0	0	2	1	0	0	22.17	129.5	80.5	137	5.65	213	5.8	7.1	20	20	43.9	15.12	1.3	108.3	4.36	4.11	138.7	4.67	1.2	2.76	1.12	0
1	52	3	1	1	0	0	0	60	177.5	84.1	83	96	0.86	0	0	0	1	1	6.5	1	26.695	133.25	84.75	165	7.05	131	6.5	5.8	26	20	44.7	16.9	3.19	105.69	6.33	4.49	142	5.45	2.17	3.57	1.15	0
1	52	2	1	1	0	0	0	30	167.5	76.75	90	106	0.845	0	0	0	1	0	0	0	27.3	124.25	78	95	6.74	252	5.6	6.5	18	17	45	13.73	5.72	93.3	5.65	4.28	135	3.38	1.36	1.52	0.97	0
1	52	3	1	0	0	0	0	50	173	61.7	78	94	0.825	0	0	0	1	1	0	0	20.61	121.75	77.25	126	6.08	253	5.2	5.9	46	37	47.7	10.97	1.8	73.1	21	4.4	141.4	6.16	1.6	4	1.3	0
1	52	3	0	1	0	0	0	30	174	92.65	103	106	0.97	0	0	0	1	0	0	1	30.595	125.5	76.75	153	6.17	251	5.9	5.6	23	22	51.1	17.05	3.4	80	3.1	3.94	140	3.88	2.14	1.91	0.92	0
1	52	2	1	1	0	0	0	0	180	93.5	98	110	0.89	0	0	0	2	1	0	0	28.85	126	77.5	155	6.06	211	5.6	7.3	59	32.85	46.3	16.51	2.35	59	5.49	3.94	142.3	4.63	1.94	3.01	1.02	0
0	52	3	1	1	0	0	0	0	160	79.5	99	112	0.88	0	0	0	2	1	0	0	31.05	126.5	77.5	141	5.71	187	5.4	6.7	24.96	21	46.2	6.2	3	71	5.62	4	142.3	4.84	6.17	1.46	0.69	0
0	52	2	0	1	0	0	0	30	156	49.6	82	96	0.85	0	0	0	1	1	0	0	20.375	124.25	69.25	135	5.72	219	6	6.5	16	17	45	5.1	1.1	45	5.64	4.23	138.9	6.17	0.99	4.55	1.18	0
1	52	2	1	1	0	0	0	20	173	78.35	84	95	0.88	0	0	0	2	1	0	0	26.175	123	75.5	148	3.9	184	5.7	5.6	26	23.58	48	7.8	0.7	86.1	5.62	3.74	140	3.06	1.71	1.16	1.26	0
0	52	2	1	1	0	0	0	50	152	63.9	87	101	0.86	0	0	0	1	1	0	0	27.655	128.5	76.5	139	5.36	331	5.7	6.5	19	20	51.4	9.75	2.19	58.9	6.23	4.38	140.5	4.16	1.7	2.46	1.52	0
0	52	3	1	1	0	0	0	0	160	50	84	102.5	0.93	0	0	0	2	1	0	0	19.53	122	82.5	136	4.81	259	5.4	6.7	8	14	44.8	9.77	1.1	78.9	4.36	3.92	139.7	7.58	0.7	5.51	2.06	0
1	52	3	1	1	0	0	0	0	168	64.5	88	98	0.89	0	0	0	0	1	0	1	22.85	125	81	159	4.34	321	5.8	6	17	14	44.7	10.4	1.4	73.1	2.92	4.07	139	5.13	0.94	4.05	1.07	0
1	52	2	0	1	0	0	0	0	172	74.7	80	90	0.88	0	0	0	1	1	0	0	25.25	129	81	161	4.48	156	5.7	6.4	35	26	51.25	14.86	2.81	62.6	3.93	4.46	138.5	3.84	0.93	2.56	1.16	0
0	52	3	1	1	0	0	1	0	165	67.3	85	100	0.85	0	0	0	0	1	0	0	24.71	119	79	148	6.31	249	5.9	7	77	54	45.33	21.3	3.87	64	5.13	3.76	139.6	3.5	2.18	1.08	1.14	0
1	52	3	1	1	0	0	0	30	170	68.55	78	94	0.825	0	0	0	2	1	0	0	23.715	124.75	76.75	134	8.81	170	5.4	6.4	9	15	44.2	8.16	2	84.8	6.48	3.95	140	3.21	0.6	1.69	1.16	0
0	52	3	1	1	0	0	0	50	168	57.35	72	87	0.825	0	0	0	2	1	1	0	20.315	124.25	77.25	119	5.51	319	5.3	6.1	13	20	48.4	13.5	2.56	52.6	4.86	4.7	143	6.35	0.99	4.89	1.29	0
1	52	3	0	1	0	0	0	0	175	82	88	96	0.91	0	0	0	0	1	0	0	26.77	129	84	149	6.29	213	5.7	6.3	149	70	48.1	13.83	1.63	62.1	4.14	4	142	5.13	1.97	3.45	1.02	0
0	52	2	1	1	0	0	0	0	166	60.5	76	98	0.77	0	0	0	2	1	0	0	21.95	122.5	69	120	6.02	195	6	6.2	46	28	50.1	8.97	1.8	61.63	3.91	4.08	140.6	5.19	1.97	2.49	1.47	0
0	52	3	0	1	0	0	0	30	166	54.3	72	80	0.9	0	0	0	2	1	0	0	19.7	122.75	70.25	123	8.36	253	5.1	6	38	25	44.5	11.3	1.89	50.9	4.21	4.07	141.6	4.86	0.76	3.16	1.52	0
1	52	2	0	1	0	0	0	30	170	71	84	93	0.9	0	0	0	2	1	0	1	24.56	123.5	72.5	150	7.41	291	6.3	6.4	18.45	24	48.5	12.8	1.57	84	3.77	4.41	139.7	4.52	2.08	2.84	0.95	0
1	52	3	1	1	0	0	0	0	183	75.3	85	92	0.92	0	0	0	2	1	0	0	22.48	129	81.5	145	5.58	231	5.4	5.2	16	12	49.8	11.2	1.7	67.2	5.66	4.07	139	4.95	1.02	3.35	1.21	0
1	52	2	1	1	0	0	0	0	175	70.4	87	95	0.88	0	0	0	2	1	0	0	22.98	126.5	81	159	3.39	204	6	5.7	34	21.16	44	11.9	1.3	58	4.59	4.06	140.8	5.88	2.21	4.58	0.98	0
0	52	3	1	1	1	0	0	30	156	58.7	80	94	0.85	0	0	0	1	1	0	0	24.12	124	74.5	140	4.97	388	5.7	6.1	19	41	45.2	11.7	1.36	54	5.23	3.9	143.1	6.48	1.71	4.21	1.7	0
1	52	2	1	1	0	0	0	0	187	99.2	100	110	0.9	0	0	0	2	1	0	0	31.39	123.5	76	144	9.68	193	5.8	6.4	18	15	47.9	14.89	4.6	94.3	8.61	4.74	138.2	3.85	1.2	2.45	1.13	0
0	52	2	1	1	0	0	0	35	165	86	82	92	0.89	0	0	0	2	1	0	0	31.58	119	81	140	5.05	244	5.3	5.6	27	20	49.1	7.1	1.1	54.5	4.36	4.27	140.6	4.65	1.68	2.37	1.17	0
1	52	2	1	1	0	0	0	0	163	69.5	85	95	0.89	0	0	0	1	1	0	0	26.15	122.5	72	149	5.87	188	5.1	5.5	12	15	46.35	8.99	1.73	83	5.21	4.85	140.7	4.5	1.34	3	1.03	0
0	52	3	0	1	0	0	0	0	158	69.6	90	102	0.88	0	0	0	2	1	0	0	27.88	123.5	74	119	5.42	156	5.3	6.4	14	20	48.2	14	2.71	64	5.8	3.67	141	3.83	1.44	1.88	1.32	0
0	52	2	1	1	0	0	0	30	163	72.2	86	89	0.97	0	0	0	2	0	0	0	27.17	126	73.5	127	6.42	314	5.6	6.8	10	19	51.3	12.36	2	75	6.71	4.1	141.5	6.44	1.97	3.76	1.53	0
1	52	2	0	1	0	0	0	30	170	65.6	86	97	0.88	0	0	0	2	1	0	0	22.69	131	83	150	7.05	190	5.83	6.5	16	15	51.4	8.2	1.3	84.6	6.23	4.33	136	3.38	1.16	1.99	0.98	0
0	52	2	1	1	0	0	0	0	152	49.5	70	89	0.78	0	0	0	0	1	0	0	21.42	121	78	131	5.52	196	5.3	6.2	58	65	43.6	8.1	1.9	56.1	6.56	2.81	142	5.37	1.11	3.36	1.32	0
1	52	3	1	1	0	0	0	30	184	87.6	89	99	0.86	0	0	0	1	1	10	0	25.87	124.5	72.5	158	6.88	212	6.3	6	25	15	48.5	11.93	1.43	75.9	5.13	4.4	137.7	5.75	2.83	3.74	1.1	0
1	52	2	1	1	0	0	0	50	175	78.1	80	90	0.885	0	0	0	1	1	0	0	25.495	126.75	72.75	154	7.41	311	6.2	5.8	35	21	47.9	11.8	1.76	79	4.55	4.32	136.9	5.21	1.51	3.71	0.91	0
1	52	2	0	1	0	0	0	30	176	85.6	92	100	0.92	0	0	0	1	1	0	0	27.63	122	72.5	163	3.38	165	5.6	6.2	88	62	48.5	15.38	2.58	74	3.96	4.21	140.6	3	1.35	1.52	1.16	0
1	52	3	1	1	0	0	0	30	178	66.5	76	88	0.86	0	0	0	1	1	0	0	20.98	127	71	147	5.47	222	5.4	6	49	35	49.8	26.38	5.93	75	6.93	4.16	140.6	4.02	1.64	2.21	1.36	0
1	52	2	1	1	0	0	0	60	160	50	81	85	0.9	0	0	0	1	1	0	0	19.53	125.5	74	186	5.49	259	6.3	6	27	18	51.3	12.91	1.56	66	5.62	4.32	140	4.97	1.66	3.63	1.1	0
1	52	3	1	1	0	0	0	30	175.9	75.2	88	94	0.935	0	0	0	1	0	0	0	24.3	127	73.75	149	7.53	161	6	5.9	27	27	48.2	15.6	2.47	87	5.97	3.93	140.6	7.21	4.31	4.78	0.81	0
0	52	2	0	1	0	0	0	30	165	54.65	78	85	0.915	0	0	0	2	0	0	0	20.07	125.75	70	129	6.74	225	6	6.2	41	24	44.8	9.98	1.01	49	7.03	4	143	5.26	1.2	2.83	1.63	0
1	52	3	1	1	0	0	0	50	170	83.8	85	101	0.84	0	0	0	1	1	0	0	28.99	126.5	76	171	6.59	130	6.5	5.9	38	27	49.8	26.1	4.2	73.9	5.33	3.73	138.3	4.04	1.67	2.38	1.11	0
1	52	3	0	1	0	0	0	30	175.5	85.7	100	100	0.9	0	0	0	2	1	0	0	27.815	125.25	73.5	169	5.29	146	6.1	5.8	23	18	47.9	15.6	2.19	85	5.3	4.06	140.3	4.21	1.61	2.52	0.94	0
1	52	2	0	1	0	0	0	30	187	96.6	107	115	0.93	0	0	0	1	1	0	0	36.08	126	75	153	6.94	194	5.6	5.8	25	17	46	10.52	1.2	60.8	2.78	4.45	142.4	4.04	3.13	1.59	0.72	0
0	52	3	0	1	0	0	0	20	160	60	80	90	0.88	0	0	0	2	1	0	0	23.43	123	74.5	140	6.52	278	5.9	7.2	79	44	41.8	11.76	1.6	57	8.73	4.71	141.7	4.27	3.01	1.79	1.43	0
0	52	2	1	1	0	0	0	0	160	60.2	70	90	0.87	0	0	0	2	1	0	0	23.51	119	78	113	4.19	288	6	6.2	10	16	46.4	3.89	1.24	46.62	3.98	3.96	140.6	4.15	1.27	2.34	1.09	0
1	52	2	1	1	0	0	0	30	175	68	87.5	100	0.875	0	0	0	1	1	1	0	22.195	130.25	86.75	158	7.27	166	6.5	6.5	69	48	46.6	22.7	5.9	77	5.95	4.33	140.4	4.05	1.28	1.89	1.63	0
1	52	3	1	1	0	0	0	30	174	70.45	83	94	0.88	0	0	0	1	1	2	0	23.265	122.5	70.5	155	6.05	188	5.1	6.1	19	18	46.6	11.4	1.54	80	5.34	3.72	140	6.26	1.79	4.32	1.08	0
0	52	3	1	1	0	0	0	30	163	84.6	90	95.5	0.91	0	0	0	1	1	0	0	31.84	126.5	72.75	154	5.59	266	5.3	7	25	19	47.9	33.83	6.84	74.3	3.93	4.17	142	6.11	2.87	3.99	1.14	0
1	52	2	1	1	0	0	0	0	170	63.3	78	90	0.86	0	0	0	1	1	0	0	21.9	122	77.5	150	6.59	210	5.9	6.4	27	21	51.3	9.4	1.89	51.8	3.78	4.1	134.5	5.44	0.73	3.31	1.35	0
1	52	3	1	1	0	0	0	0	188	89.8	95	100	0.93	0	0	0	2	1	0	0	25.4	126.5	78	161	4.95	155	5.3	5.6	21	20	47.1	14	1.8	77	5	3.69	138.4	5.73	1.7	3.8	1.29	0
1	52	2	1	1	0	0	0	30	168	73.2	94	100	0.94	0	0	0	1	1	0	1	25.93	124	75	147	6.35	234	5.1	6.4	16	20	49.7	13.34	3.7	66	5.29	4.54	139.7	6.88	1.86	4.49	1.5	0
0	52	3	1	1	1	0	0	30	165	74.9	80	92	0.86	0	0	0	2	0	0	0	27.51	128.25	78.75	145	5.57	221	5.2	6.4	21	27	49.8	15.8	2.04	95	6.07	4.44	140.6	6.13	2.5	3.68	1.25	0
1	52	3	1	1	0	0	0	30	172	79.7	92.5	103	0.895	0	0	0	2	0	0	0	26.935	129	77.25	137	6.83	292	5.3	6.5	41.54	35	46.7	30.68	8.97	74	5.25	4.58	139.3	3.57	2.83	1.42	1.05	0
1	52	2	0	1	0	0	0	30	172.65	70.5	85	90	0.88	0	0	0	1	1	2.5	1	23.615	124	77.5	160	5.98	200	6.6	6.3	34.82	25	49.8	17.4	5.51	77	4.87	4.32	143.6	3.4	2.11	2.02	1.06	0
1	52	2	0	1	0	0	0	30	176	71.35	82	96	0.85	0	0	0	1	1	0	0	23.025	123.75	74.5	156	6.23	194	5.4	5.4	19	21	51.3	13.48	1.9	70	8.53	4.53	138.5	3.93	0.97	2.46	0.98	0
0	52	3	1	1	0	0	0	30	158	63.35	83	92	0.9	0	0	0	1	1	0	0	25.37	122.5	75.5	135	5.75	253	5.7	5.9	15.23	20	47	14.39	2.25	64.2	7.07	4.32	142.9	5.64	3.64	2.99	1.44	0
1	52	3	1	1	1	0	0	0	175	62.5	75	80	0.93	0	0	0	2	1	0	0	20.4	121	77.5	145	6.27	241	6	6.4	15	22	49.8	17.9	2.31	77	6.22	4.32	137.9	6.33	0.84	4.59	1.14	0
0	52	2	0	1	0	0	0	0	168	66.9	88	99.5	0.94	0	0	0	0	1	0	0	30.68	127	76.5	116	6.65	300	5.6	5.9	12	17	44.7	5.63	1.3	76.4	7.5	4.98	142	4.35	0.87	3.27	1.11	0
0	52	2	1	1	0	0	1	0	160	56.4	74	86	0.86	0	0	0	0	1	0	0	22.03	126	77.5	139	5.55	308	5.9	5.8	19.8	17	45.33	9.1	1.1	77	4.32	4.43	139.7	6.59	3.15	4.57	0.87	0
0	53	3	1	1	0	0	0	30	163	54.35	75	88	0.86	0	0	0	2	1	0	0	20.45	124.75	75.25	160	3.99	243	5.4	6.5	22	30	51.3	13.86	2.1	51	3.78	4.54	140	5.63	1.73	4.46	1.45	0
1	53	3	0	1	0	0	0	0	183	79.8	86	100	0.86	0	0	0	2	1	0	0	23.82	129.5	82.5	169	5.19	267	5.3	5.2	31	22	48.4	17.09	1.6	88.7	5.18	4	141.6	6.17	1.93	4.19	1.37	0
0	53	2	1	1	0	0	0	30	155	65.65	83	94	0.88	0	0	0	1	1	0	0	27.32	123.25	74.25	140	5.88	205	5.2	6.5	22	27	45.7	10.67	2.3	83	4.16	4.38	141	3.7	1.92	1.55	1.21	0
1	53	2	1	1	0	0	0	0	173	83.8	76	99	0.76	0	0	0	2	1	0	0	27.99	116.5	78	136	7.45	225	5.3	6.4	16	17	45.5	19.16	5.8	91.4	5.04	4.54	137.2	4.48	0.87	2.58	1.41	0
0	53	3	1	1	0	0	0	30	156	70	78	96	0.88	0	0	0	2	0	0	0	28.76	123	79	140	5.44	249	5.6	5.5	54	52	47.7	14	1.72	53.9	4.3	4.32	139.8	5.33	1.91	3.99	1.01	0
0	53	3	1	1	0	0	0	30	172	75.2	83	94	0.88	0	0	0	1	1	0	0	23.66	125.5	75	147	7.68	233	5.8	5.8	26	26	48.2	18.26	1.89	50.9	5.59	3.82	136.1	7.85	1.78	1.8	0.95	0
1	53	2	1	1	0	0	0	0	170	89.8	110	122	0.9	0	0	0	2	1	0	1	31.07	121	74	149	6.52	205	6	6.9	54	30	46.6	16.45	2.9	61.8	4.8	3.95	139.6	3.92	1.84	2.19	1.03	0
1	53	2	1	1	0	0	0	60	170	80.1	91	106	0.86	0	0	0	1	1	0	1	27.71	124.5	76	160	5.8	159	5.3	5.4	18	20	46.6	15.35	3.19	86.4	5.07	4.12	140	4.1	1.41	2.15	1.2	0
0	53	3	1	1	0	0	0	0	166	88.5	100	115	0.86	0	0	0	2	1	0	0	32.11	129	75.5	146	7.6	308	5.5	6	12	14	43.9	13.21	1.85	70.6	7.83	4.79	141.7	5.85	2.8	4.04	0.9	0
0	53	3	1	1	0	0	0	30	155	52	76	98	0.77	0	0	0	1	0	0	0	21.64	130	73	130	4.41	256	5.3	5.7	36	26	46.3	8.3	1.73	50.9	7.01	4.6	138.9	3.45	2.09	1.64	1.09	0
0	53	3	1	1	1	0	0	45	164.9	66.75	78	96	0.81	0	0	0	1	1	0	0	24.54	132.75	78.5	139	5.85	269	6	6	25	22	46.6	11.39	1.3	63	4	3.72	141	5.95	1.75	3.87	1.22	0
0	53	2	1	1	0	0	0	30	167	72.4	90	97	0.86	0	0	0	1	1	0	0	26.99	122.5	75	135	6.15	198	5.6	6.6	21	23	49	19.81	2.68	70	5.48	3.99	140.1	4.66	1	3.17	1.59	0
1	53	2	1	1	0	0	0	30	173	66.4	85	97	0.87	0	0	0	1	1	0	0	22.18	129.5	77.5	145	6.3	262	5.2	6	24	20	49	12.32	2	79.1	6.64	3.98	138	5.06	1.62	3.15	1.17	0
1	53	3	1	1	0	0	0	0	172	80.6	86	105	0.82	0	0	0	0	1	0	0	27.24	124	75	150	4.73	285	5.3	6.4	31	21	48.5	7.04	0.7	72	5.84	4.03	130.4	6.22	0.66	5.07	1.29	0
1	53	3	1	1	0	0	0	30	178	77	85	96	0.88	0	0	0	1	1	0	0	24.3	124.5	77.5	157	4.82	216	6.2	5.8	36.71	29	46	15.34	1.71	63.7	4.59	4.49	140	4.6	0.92	2.68	1.09	0
1	53	2	1	1	0	0	0	40	158	67.3	82	80	1.02	0	0	0	2	1	0	0	26.95	124.5	74.5	152	5.57	377	5.2	6.2	29	22	47.5	9.58	2.01	70	5.44	3.98	138	3.5	1.5	2.66	0.92	0
1	53	2	1	1	0	0	0	0	172.5	73	85	90	0.94	0	0	0	0	1	0	0	24.605	123.75	77.25	134	9.41	245	5.6	6.1	16.74	23	43.2	9.1	2	66	3.38	2.81	139.4	5.08	0.79	3.05	1.56	0
1	53	3	1	1	0	0	0	30	166	86.8	94	110	0.85	0	0	0	2	1	0	0	31.49	122.5	75	144	6.96	239	6	7.3	23	22	44.5	7.28	2.8	83.2	6.92	4.09	143	4.74	0.73	3.41	1.1	0
1	53	2	0	1	0	0	0	0	168	70	82	93	0.88	0	0	0	0	1	0	0	24.8	121	77	151	4.8	198	5.8	5.9	20	16.67	49.7	7.5	2	84.25	7.23	4.31	130.4	4.19	1.09	2.54	1.1	0
0	53	2	1	1	0	0	0	60	160	55	78	85	0.91	0	0	0	2	1	0	0	17.96	125	78.5	136	5.14	246	5.83	6.9	25	23	47.34	16.69	5.51	58.4	4	3.94	138.2	4.51	0.9	2.14	2.09	0
1	53	3	1	1	0	0	0	30	181	94.1	107	107	1	0	0	0	1	1	0	1	28.72	126	75.25	141	5.49	224	5.6	6.6	23	23.97	46.1	14.72	1.97	87	5.87	4.41	138.5	5.89	1.85	3.86	1.07	0
0	53	2	1	0	0	0	0	0	159	50.5	78	88	0.88	0	0	0	2	1	0	0	19.97	122.5	76.5	143	7.41	161	5.5	6.5	29	23	46.5	17.73	4.59	69	6.02	4.09	139.6	5.48	0.78	3.56	1.96	0
1	53	2	1	1	0	0	0	20	169.8	79.85	96	100	0.96	0	0	0	1	0	5	1	27.69	125.75	75.5	149	5.88	233	5.8	6.5	48	26	47.2	14.22	2.35	122.6	7.92	4.81	137	3.4	0.88	2.2	0.9	0
1	53	2	1	1	0	0	0	0	162	64.8	80	90	0.88	0	0	0	0	1	0	0	24.69	122.5	82	157	7.15	146	5.4	6.1	49	32	46.2	16.94	5.9	80	3.84	4.38	141.3	4.18	1.99	2.26	1.2	0
1	53	3	1	1	0	0	0	20	180	72.8	84	92	0.91	0	0	0	1	1	0	0	22.46	129	74.5	148	4.65	189	5.2	5.9	19.99	18	47	11.03	1.44	70	4.16	3.73	139.3	5.05	1.35	3.77	1.08	0
0	53	3	1	1	0	0	0	40	160	54.2	78	88	0.89	0	0	0	2	1	0	0	21.17	122	73	137	7.35	281	5.6	6.5	24	29	48.36	17.28	3.32	59.81	4.69	4.25	139.3	4.7	0.89	2.6	1.75	0
0	53	3	1	1	0	0	0	60	166	63.3	84	85	0.865	0	0	0	1	1	0	0	23.02	122.5	76.5	122	5.1	212	5.7	5.8	19	22	47.7	8.83	0.91	44.8	4.44	4.34	137.8	4.14	1.32	1.97	1.29	0
1	53	2	1	1	0	0	0	30	162	56.7	78	86	0.9	0	0	0	2	1	0	0	24.075	125.5	73	160	8.39	188	5.4	5.6	17	18	46	11.38	1.4	75.19	6.03	4.86	137.6	4.54	0.63	3.1	1.19	0
0	53	3	1	1	0	0	0	30	157	57.3	80	120	0.67	0	0	0	1	1	0	0	23.24	128.5	78	140	6.82	234	6.3	5.9	29	25	46.8	11.75	2	44.41	3.4	3.8	139.4	5.39	0.91	3.78	1.22	0
1	53	3	1	1	0	0	0	30	169	75.15	90	98	0.915	0	0	0	1	1	0	0	26.305	123.75	74.75	170	3.71	126	5.1	6	34	34	44.7	24.9	14.13	81.9	4.46	5.05	139.5	5	0.93	2.85	2.06	0
1	53	2	0	1	0	0	0	30	172	82.4	88	100	0.88	0	0	0	1	1	10	1	27.85	126.5	74.5	146	4.13	167	6.2	6.2	21	31	44.8	23.01	7.18	61	5.59	3.86	135.8	3.86	0.99	1.94	1.47	0
0	53	2	1	1	0	0	0	0	150	52	85	95	0.89	0	0	0	0	1	0	0	28.88	128	72	138	6.17	268	5.3	5.8	10	17	49.8	6.71	1.61	75.9	3.37	5.56	141.2	4.79	0.98	2.85	1.53	0
0	53	3	1	1	0	0	0	0	162	59.4	86	94	0.91	0	0	0	0	1	0	0	22.63	124	73.5	132	5.35	308	5.7	5.8	25	18.55	48.5	9.73	2.56	64	3.51	4.58	129	5.43	3.13	2.72	1.26	0
1	53	3	1	1	0	0	0	20	169.75	69.35	84	95	0.88	0	0	0	1	1	0	0	24.06	124	74.5	148	5.83	195	5.6	6	38	30	45.9	18.3	3.82	99.5	4.87	4.12	141.3	6.57	0.91	4.47	1.45	0
1	53	2	1	1	0	0	0	0	174	85.5	103	110	0.93	0	0	0	0	1	0	2	28.24	126.5	81.5	145	5.19	215	5.6	6.3	34	26	51.7	12.3	3.18	57	3.98	4.33	138.9	6.52	1.45	4.64	1.36	0
0	53	2	1	1	0	0	0	30	150	58.2	82	90	0.91	0	0	0	2	1	0	0	25.86	123	77	142	5.96	247	5.5	6	17	19	47.38	11.3	1.4	60	5.36	4.46	139.5	7.63	2.42	5.04	1.37	0
1	53	2	1	1	0	0	0	30	168	57	79	90	0.875	0	0	0	1	1	0	0	20.19	123.25	76	148	11.27	206	6	7.1	19	19	48.4	10	2.3	73.6	6.51	4.19	138.2	3.53	1.31	2.34	0.93	0
1	53	2	1	1	0	0	0	0	165	79.6	94	103	0.91	0	0	0	0	1	0	1	29.23	127	71.5	166	6.36	259	5.5	5.4	27	16	44.7	15.94	2.4	56	5.18	3.85	138.7	5.01	0.91	3.13	1.35	0
1	53	2	1	1	0	0	0	0	180	80	83	96	0.86	0	0	0	0	0	0	1	26.29	123	81.5	148	7.24	261	5.7	6.1	20	24	49.8	5.3	3	113	7.32	4.98	143.6	14.43	0.94	3.18	3.56	0
0	53	2	1	0	0	0	0	30	160	60	80	97	0.82	0	0	0	1	0	0	0	23.435	124.5	76.75	145	5.13	274	5.4	5.7	19	19	49.7	11.15	1.76	38	16	4.55	138.9	5.1	1.8	3.29	1.26	0
1	53	2	1	1	1	0	0	60	170	80	94	108	0.87	0	0	0	2	1	0	0	27.675	128.5	76.75	141	6.42	270	6.6	6.7	53	35	46.7	15.4	4.03	79	7.38	4.24	139	2.99	1.15	1.26	1.32	0
0	53	2	0	1	0	0	0	120	165	70.7	84	96	0.88	0	0	0	2	1	0	0	25.96	130	80	132	3.96	269	6.3	6.3	62	23	49.8	9.35	1.7	58	4.6	4.26	139.2	6.43	1.77	3.57	1.61	0
1	53	2	1	0	0	0	0	30	167.5	62.55	70	92	0.76	0	0	0	1	1	0	0	22.285	123.25	74.75	147	5.22	252	5.9	6.2	15.6	16	48.4	13.2	2.6	76.5	6.28	4.23	136.3	3.21	0.53	1.7	1.27	0
0	53	3	1	1	1	0	0	0	160	60.4	70	90	0.77	0	0	0	1	0	0	0	23.59	122	66.5	132	5.88	172	6	5.8	13	20	45.4	11.1	2.8	63.11	2.58	3.95	141.6	4.55	1.34	2.71	1.19	0
1	53	3	1	1	1	0	0	0	170	85.4	100	115	0.86	0	0	0	1	0	0	0	29.93	121	77.5	154	4.46	214	5.4	5.8	28	27	46.1	25	3.56	75.22	5.18	4.37	140.5	5.29	2.21	3.7	0.75	0
0	53	3	1	1	0	0	1	30	157	56.55	77	82	0.935	0	0	0	2	1	0	0	22.94	128	80	139	7.1	161	5.5	6	22	15	47.34	6.63	1.4	66	5.84	3.74	141.7	4.6	1.28	2.72	1.12	0
1	53	3	1	1	1	0	0	0	171	69.8	80	90	0.88	0	0	0	2	0	0	0	23.87	122	74.5	137	7.79	271	6	6	18	22	44.5	7.9	3.6	68	4.01	3.68	138.5	5.04	0.64	3	1.4	0
1	53	3	1	1	0	0	0	30	169	90.75	104	100	1.04	0	0	0	1	1	0	0	31.755	135	82	171	6.42	190	6.5	6.2	27	19.07	44.7	14	1.92	53.8	21	4.66	137.7	4.09	2.33	2.04	0.81	0
1	53	3	1	1	0	0	0	0	175	74.8	80	90	0.88	0	0	0	2	1	0	0	24.42	126.5	73.5	142	6.2	116	5.4	6	28	32	46.5	12.36	1.95	67	7.14	3.69	141.9	3.63	1.07	1.97	1.37	0
1	53	2	1	1	0	0	0	0	175	79.5	95	102	0.93	0	0	0	2	1	0	2	25.95	126.5	78	143	5.45	203	5.4	6.3	56	41	45.4	24.43	7.57	95	4.97	3.7	143.4	4.4	0.66	2.33	1.84	0
1	53	2	0	1	0	0	0	60	170	69	80	90	0.88	0	0	0	2	1	5	0	23.87	123	70.5	167	5.14	195	5.7	6.4	21	15	44.7	11.7	1.2	59	6.65	4.24	136	7.46	2.2	4.99	1.11	0
1	53	2	1	1	0	0	0	0	180	85.7	90	102	0.88	0	0	0	2	1	0	0	26.45	129	83	143	8.29	167	6.3	6.6	27	19	42.8	11.6	1.71	78.3	4.45	3.94	120	3.46	1.44	1.65	1.02	0
0	53	3	0	1	0	0	0	0	156	47.4	74	80	0.92	0	0	0	2	1	0	0	22.68	121	71.5	136	4.83	260	5.2	5.7	14	21	46.9	10.61	1.22	42.4	3.78	4.46	139.9	5.78	1.18	3.72	1.7	0
0	53	2	1	1	0	0	0	0	160	63.8	80	90	0.88	0	0	0	0	1	0	0	24.92	121	74.5	131	6.34	423	5.7	7.2	20	17	49	5.42	1.2	63.1	4.54	4.47	135.6	5.16	1.66	3.54	1	0
1	53	3	0	1	0	0	0	30	173	87.3	103	113	0.91	0	0	0	1	1	0	0	29.16	124	72.5	145	7.46	231	6.3	6.4	38.83	23	46.9	7.3	1.3	76.5	6.93	4.42	139	3.86	2.09	1.85	1.07	0
1	53	3	1	1	0	0	0	30	165	70.5	93.5	98	0.875	0	0	0	1	1	0	1	25.89	124.75	77	154	5.91	124	5.3	5.9	34.38	31	48.8	19.7	2.7	64	5.62	4.46	140.1	4.01	1.39	2.13	1.17	0
1	53	2	0	1	0	0	0	50	172	83.05	102	109	0.935	0	0	0	1	1	0	0	28.07	124	73.25	158	8.32	193	5.4	6.6	21	17	49	12.13	2.49	98.5	5.78	4.75	139.5	4.62	3.17	2.36	0.95	0
1	53	2	1	1	0	0	0	30	174	85.6	93	109	0.85	0	0	0	1	1	10	1	28.27	125	74.5	155	6.93	153	5.3	6	34	25	46.3	12.28	1.8	59.5	2.96	3.77	141.3	3.98	2.45	2.22	1.03	0
1	53	3	1	1	0	0	0	30	173	74.7	85	92	0.92	0	0	0	2	1	0	0	24.95	123.5	76.5	144	5.98	201	5.6	5.7	44	27.29	46.35	7.92	1.22	95	4.44	4.55	142.7	5.08	1.4	3.1	1.42	0
1	53	2	1	1	0	0	0	20	172	87.85	96	110	0.87	0	0	0	1	1	0	0	29.69	126.75	74.25	139	4	164	6	6	36	27	43.6	13.05	5.3	78.9	4.79	4.4	139.4	5.12	1.02	3.3	1.18	0
1	53	2	0	1	0	0	0	0	180	98.5	98	105	0.93	0	0	0	1	1	0	1	30.4	128	76.5	165	8.52	283	5.6	7.3	32	27	41.8	13.93	3.1	70.2	5.57	4.21	140.2	3.77	1.97	2.66	1.01	0
0	53	3	1	1	0	0	1	30	163	61	84	96	0.88	0	0	0	1	0	0	0	27.24	124	76	133	5.84	250	5.4	5.6	14	20	47.9	10.12	1.6	75	8.64	4.45	138.8	4.67	2.14	2.56	1.28	0
1	53	2	1	1	0	0	0	0	175.5	89.05	86	102	0.89	0	0	0	0	1	2.5	1	28.905	127.25	76	170	4.4	227	5.4	5.4	15.67	15	41.8	11.2	1.72	103.8	6.91	4.55	139.7	3.26	1.15	1.72	0.96	0
1	53	3	0	1	0	0	0	0	174	84.8	90	100	0.9	0	0	0	2	1	0	2	28	124	74.5	151	7.1	252	5.7	6.2	31	21	49.2	14.8	2.31	73.3	5.54	4.56	140.2	7.21	1.5	5.5	1.11	0
1	53	2	1	1	0	0	0	30	168	61.1	80	100	0.8	0	0	0	1	1	0	0	21.64	122	73	156	5.54	177	5.8	6.4	46	30	47.6	7.3	1.54	88	3.94	4.2	138.9	4.44	1.75	2.61	1.06	0
1	53	2	1	1	0	0	0	0	172	65.55	84	90	0.93	0	0	0	0	1	0	0	22.155	122.5	74.25	152	6.14	235	5.7	6.2	34	22	48.4	13.26	1.76	103.6	5.81	4.7	136.5	5.95	5.6	3.11	1.47	0
1	53	3	0	1	0	0	0	30	170	72.8	92	98	0.94	0	0	0	1	1	0	0	25.19	126	77	143	4.69	181	5.6	5.4	19.23	27	45.4	8.9	1.7	83.5	6.5	3.83	140	6.85	1.67	5.33	1.26	0
0	53	3	1	1	0	0	0	30	167	65.4	78	90	0.865	0	0	0	1	1	0	0	23.445	122.75	75.25	138	5.36	200	5.3	6	23	22	45.6	11.19	1.39	63.6	4.99	4.35	141.7	5.46	1.54	3.66	1.52	0
1	53	2	0	1	0	0	0	30	172	67.6	83	96	0.86	0	0	0	2	1	0	1	22.85	125	75	140	4.13	219	5.6	5.7	17	20	48	13.2	2.02	89.4	4.5	4	140.6	3.34	0.5	2.03	1.07	0
0	53	2	1	1	0	0	0	3	162	66.4	86	90	0.93	0	0	0	1	1	0	0	25.295	122.75	75.5	151	6.3	209	6	7	92	54	48.36	14.6	2.01	57	2.53	4.12	142.4	5.55	1.56	3.46	1.55	0
0	53	3	1	1	0	0	0	30	170	65.2	81	100	0.81	0	0	0	2	1	0	0	22.56	125	75.5	139	4.66	316	5.6	5.5	18	19	41.8	13.69	1.8	58.4	5.11	4.33	139.7	4.97	2.04	2.91	1.16	0
0	53	3	1	1	1	0	0	30	162	70.8	90	110	0.81	0	0	0	0	0	0	0	26.975	124.5	77.25	148	6.15	179	6	5.9	55	37	46.2	20.87	4.1	38	6.37	3.96	139.6	5.24	1.47	2.61	1.59	0
0	53	3	0	1	0	0	0	0	155	64.7	78	85	0.91	0	0	0	0	1	0	0	26.93	122.5	76	135	5.42	342	5.5	6.5	34	42	51.4	11.9	2.25	61.1	4.14	4.16	130.3	4.74	1.29	3.43	1.2	0
0	53	3	1	1	0	0	0	30	170	70	78	94	0.82	0	0	0	2	0	0	0	24.22	121	74.5	103	8.07	284	5.8	6.7	37	30	48.2	1.06	1.4	65.2	4.87	4.8	135.3	4.95	1.89	3.04	1.1	0
0	53	2	1	1	1	0	0	30	163	60.7	83.5	93	0.895	0	0	0	2	1	0	0	22.84	131.75	78.75	126	8.88	277	5.1	6.5	24	26	46.3	9.83	1.43	64.2	6.19	4.05	138	6.3	1.6	4.57	1.07	0
1	53	3	0	1	0	0	0	0	184	95.25	98	100	0.98	0	0	0	0	1	0	0	31.125	124	75.75	147	5.29	182	5.5	5.8	22	17	41.8	7.35	1.4	73	7.23	4.14	138	5.7	1.41	4.85	0.73	0
0	53	3	1	1	1	0	0	0	165	69.7	78	90	0.94	0	0	0	1	1	0	0	25.6	122	74.5	131	7.7	200	5.4	5.9	16	21	45.9	7.7	1.61	69	5.9	4.26	139.8	5.89	1.86	3.49	1.36	0
1	53	2	1	0	0	0	0	120	171	70.6	77	96	0.8	0	0	0	2	1	0	0	24.14	131.5	77.5	153	8.32	138	5.5	5.9	61	43	47	13.86	1.5	92.99	5.52	3.8	140.9	3.79	0.89	2.28	1.08	0
0	53	3	1	1	0	0	0	0	155	52.2	76	88	0.86	0	0	0	0	1	0	0	21.72	121	81.5	134	6.11	282	5.3	5.8	10	20	50	9.82	2.6	45.34	4.95	3.79	138.7	4.73	1.38	2.9	1.68	0
1	53	2	1	1	0	0	0	0	173	89.8	96	105	0.91	0	0	0	2	1	0	0	30	128	79.5	158	6.05	201	5.7	6.3	34	21	47.65	14.8	1.71	93.6	7	4.22	138.2	5.04	0.99	3.37	1.06	0
0	53	2	1	1	1	0	0	30	166	86.7	90	93	0.97	0	0	0	1	1	0	0	31.46	123	71	147	4.24	193	6.3	6.1	44	39	47.2	8.1	0.9	81	4.52	3.68	141	4.68	1.59	2.51	1.23	0
1	53	2	1	1	0	0	0	30	181	64.5	76	87	0.87	0	0	0	1	1	5	1	19.68	122.75	73	153	6.82	182	5.3	5.4	12	18	44.7	16.3	2.4	80	5.15	4.74	139.1	3.52	1.54	1.63	1.32	0
0	53	3	1	1	1	0	0	30	160	49.5	60	76	0.785	0	0	0	1	0	0	0	19.33	120	76	158	3.39	173	5.1	5.7	18	21	47.9	12.96	1.68	49.9	5.46	3.67	141.3	7.81	3.86	4.38	1.69	0
0	53	3	1	1	0	0	0	0	160	58.4	80	99	0.8	0	0	0	1	1	0	0	22.81	122	82.5	141	5.8	244	6	5.8	21	22.34	50	11.26	1.7	50.9	7.14	4.05	138.2	5.23	1.48	2.99	1.66	0
0	53	3	1	1	0	0	0	0	168	69.3	88	96	0.91	0	0	0	1	1	0	0	24.55	122	81.5	137	5.73	200	5.9	5.7	22	25	45.9	6.82	1.7	62	6.2	4.28	141.5	6.29	2.49	4.49	0.8	0
1	53	2	1	1	0	0	0	0	175	70.2	80	90	0.88	0	0	0	0	1	0	0	22.92	121	74.5	142	5.24	162	5.4	5.7	50	33	48.7	16.4	4.03	69.5	4.5	4.74	138.7	5.76	0.94	3.78	1.67	0
1	53	2	1	1	0	0	0	0	180	85.5	90	107	0.84	0	0	0	0	1	0	0	26.38	130	79.5	150	4.48	154	5.7	6.9	57	44.16	51.3	23.5	6.9	81.3	6.83	4.02	141.6	4.98	3.13	2.37	1.36	0
1	53	2	1	1	0	0	0	35	172	85.75	90	100	0.9	0	0	0	1	1	0	0	28.98	128.75	77.5	171	6.32	126	6.3	6.2	25	19	46	19.7	3.1	101.6	6.59	4.07	139.4	5.29	1.97	3.3	1.23	0
0	53	3	1	1	0	0	0	0	175	65.4	90	97	0.92	0	0	0	2	1	0	0	21.35	128.5	76	133	9.39	252	5.9	6.6	22	22	48.36	14.42	2.07	61.1	6.37	4.23	141.4	6.09	1.75	4.51	1.57	0
1	53	3	1	1	1	0	0	30	179	91.6	96.5	106	0.915	0	0	0	1	1	5	1	28.585	125.25	80.25	169	5.29	221	6	5.8	32	27	48.2	16.94	2.35	70	6.63	4.21	137.7	3.61	1.74	2.24	1.21	0
0	53	2	1	1	0	0	0	60	155	67.1	87	98	0.89	0	0	0	1	1	0	0	27.92	126.5	71	151	5.41	247	5.6	5.9	20	18	49.1	10.31	1.7	49.9	4.96	4.17	140.7	8.41	2.44	6.43	1.39	0
1	53	2	0	1	0	0	0	30	165	70.4	79	88	0.9	0	0	0	1	1	0	0	25.85	126	75	142	6.09	240	5.4	6.1	15	23	45.6	11.85	0.67	67	4.08	3.69	138.7	4.77	0.84	3.42	1	0
0	53	2	1	1	0	0	0	60	160	70.75	86	97	0.89	0	0	0	1	1	0	0	27.63	127.25	77.75	137	10.43	224	6.4	6.6	26	23	45.33	8.1	1.9	60	6.48	4.35	141	3.34	1.02	2.05	1.21	0
0	53	2	1	1	1	0	0	30	167	59.65	78	95	0.82	0	0	0	1	1	0	0	21.385	124.5	75	142	4.66	199	5.6	5.9	38	31	46.2	13.04	1.3	52.4	4.9	3.9	140.6	4.11	0.82	2.2	1.5	0
1	53	3	1	1	0	0	0	30	175	84.1	94	100	0.94	0	0	0	1	0	0	1	27.46	124	76.5	127	6.42	314	5.5	6.3	12	19	49.7	8.6	2.8	93.9	6.28	4.47	130.4	4.09	1.37	2.18	1.06	0
1	53	2	1	1	0	0	0	50	175	98.55	98.5	103	0.955	0	0	0	1	1	8	0	32.175	131.5	80.75	155	7.56	223	5.1	6	35	18	46.7	12.9	2.5	90.7	5	3.82	141	3.44	1.37	1.74	1.25	0
0	53	3	1	1	0	0	0	60	157	70	86	93	0.92	0	0	0	1	1	0	0	28.375	123.5	75.25	135	6.02	294	5.8	6.2	17	12	45.9	6.5	0.9	61.5	7.87	5.17	138.3	5.5	1.26	3.92	1.23	0
0	53	2	0	1	0	0	0	20	157	58.2	83	90	0.92	0	0	0	2	1	0	0	23.61	119	66.5	128	4.82	393	5.2	5.7	18	20	44.6	9.54	1.3	52.4	7.84	5.25	138.5	6.09	0.95	4.31	1.45	0
1	53	3	1	1	0	0	0	0	178	71.3	86	94	0.91	0	0	0	0	1	0	0	22.5	123	75.25	135	6.94	210	5.8	5.7	14	10	45.2	18.34	8.1	57.1	4.42	4.44	134.5	4.34	1.01	2.93	1.09	0
1	53	2	1	1	0	0	0	50	176.5	76.8	92	99	0.925	0	0	0	1	1	3	1	24.65	125.5	74	141	6.93	212	6.5	5.7	26	23	46.2	13.16	1.95	69.4	6.06	4.65	137.8	5.49	0.84	3.33	1.33	0
0	53	3	1	1	0	0	0	30	160	61	84	90	0.93	0	0	0	2	1	0	0	23.82	124	74	145	5.33	233	6.2	6.1	6	16	45.2	13.2	1.32	50.6	4.25	3.82	140.1	4.79	1.69	3.29	1.26	0
1	53	3	1	1	0	0	0	30	170	68	78	86	0.9	0	0	0	1	1	0	0	23.52	125	74.5	149	6.8	164	5.3	6.1	16	17	41.8	5.7	1.33	79	5.96	3.35	141.3	3.9	1.52	1.92	1.25	0
1	53	3	1	1	0	0	0	60	165	74	85	98	0.86	0	0	0	2	1	0	2	27.18	127.5	87.5	140	8.85	276	5.4	5.8	25	23	44.1	16.6	4.7	63	5.62	5.13	137.5	5.12	1.48	3.45	0.97	0
0	53	3	1	1	1	0	0	30	160	56.5	74	90	0.82	0	0	0	1	1	0	0	22.07	121	72	146	7.94	229	6.4	6.3	9	14	45.2	11.2	1.56	53	5.18	3.73	138.6	4.92	2.13	3.3	1.14	0
1	53	2	1	1	0	0	0	20	180	85.3	82	92	0.89	0	0	0	2	1	2	0	26.32	124	76	150	3.46	244	5.7	5.5	17	16	46.2	12.95	0.68	72	4.39	4.33	139.8	6.14	0.55	4.55	1.47	0
1	53	3	1	1	1	0	0	0	170	65.9	85	96	0.88	0	0	0	0	0	0	0	22.8	125	76	143	7.41	238	5.3	5.7	24	22	49	11.07	2.6	73.1	4.52	4.09	137	5.9	2.04	3.5	1.26	0
1	53	2	1	1	0	0	0	30	170	65	86	89	0.96	0	0	0	2	1	0	0	22.49	124.5	75.5	153	6.78	199	5.9	6.2	22	19	48.5	23.72	4.3	52	5.56	4.37	130.3	5.6	1.52	3.47	1.51	0
0	53	2	1	1	0	0	0	60	161	78.35	96	105	0.91	0	0	0	1	1	0	0	30.22	124.25	75.25	132	6.37	213	6	6.2	30	25	43	26.38	14.13	70.94	5.45	4.45	141.4	5.51	2.81	2.99	1.58	0
0	53	2	1	1	0	0	0	20	158	65	86	97	0.88	0	0	0	2	1	0	0	26.03	122	75.5	149	4.64	230	5.5	6.2	36	42	44.7	15.4	3.54	65.9	4.09	4.72	140.7	5.1	1.52	3	1.68	0
0	53	2	1	1	0	0	0	30	164	72.3	80	102	0.78	0	0	0	2	1	0	0	26.88	124.5	76.5	157	5.9	202	5.9	6.5	47	24	49.8	4.93	0.9	47.7	5.77	4.05	141.7	5.47	2.92	3.43	1.09	0
0	53	2	1	1	0	0	0	0	159	56	89	109	0.81	0	0	0	0	1	0	0	22.15	121	80.5	121	6.59	259	5.3	6.2	22	17	45.7	9	5.3	53.23	5.62	4.33	141.9	4.57	1.09	2.51	1.6	0
0	53	3	1	1	0	0	0	30	155	63.2	86	98	0.87	0	0	0	1	1	0	0	26.3	126.75	73.25	126	4.74	248	5.9	6.2	23	20	42.5	5.1	1.4	48.8	4.96	4.35	140.4	5.25	0.7	3.45	1.5	0
0	53	2	1	1	0	0	0	30	164	67.05	83	93	0.89	0	0	0	2	1	0	0	24.925	129.5	76.75	147	9	247	5.3	6.1	15	14	47.7	12.33	1.2	53	5.93	2.81	139.6	4.93	1.49	2.81	1.33	0
0	53	3	1	1	1	0	0	30	150.4	46.75	82.5	95	0.865	0	0	0	2	1	0	0	20.665	131.25	77	132	6.89	254	6	6.1	19	20.01	45.9	11.2	1.4	29	7.14	3.82	137.5	4.74	0.81	2.99	1.14	0
0	53	3	1	1	0	0	0	60	158	80	86	98	0.87	0	0	0	2	1	0	0	32.04	120.5	79	130	8.05	301	5.4	6.4	59	31	48	9.5	1.63	60	6.23	4.96	139.9	4.19	1.46	1.59	1.36	0
1	53	2	0	1	0	0	0	30	176	79	86	102	0.84	0	0	0	2	1	5	1	25.5	122	73.5	151	6.1	172	5.5	5.7	15	17	42.5	9.1	2.78	61	5.74	4.02	142	4.49	0.82	2.49	1.52	0
1	53	2	1	1	0	0	0	20	174	64.8	85	101	0.84	0	0	0	1	1	0	0	21.4	130	78.5	167	4.94	307	5.6	6.3	59	32	47.9	13.5	1.7	64	4.7	3.91	140.8	5.34	2	2.92	1.14	0
0	53	2	0	1	0	0	0	0	160	59.2	79	89	0.88	0	0	0	0	1	0	0	23.12	123.5	73	126	5.73	254	5.3	5.8	9	13	47.5	10.3	1.3	77	10.47	5.31	137	7.2	4.92	4.58	1.18	0
1	54	2	1	1	0	0	0	30	180	75.8	84	94	0.89	0	0	0	1	1	10	0	23.39	122	75	157	5	205	6.5	5.8	14	21	48	11.6	2.68	83.2	8.8	4.07	139.5	4.99	0.94	3.38	1.44	0
0	54	3	1	1	0	0	0	30	152	60.05	84	90	0.93	0	0	0	1	1	0	0	25.985	124	74	139	5.04	248	5.4	7.2	19	22	48.4	11.45	3.28	60.2	6.58	3.95	142.5	3.76	1.9	2.32	1	0
1	54	3	1	1	0	0	0	30	174	72.3	81	82.5	0.94	0	0	0	2	1	0	0	23.88	124.5	72.5	150	6.89	221	5.3	6.4	19	22	48.4	13.75	2.31	65.2	5.05	3.95	137.7	3.75	0.96	2.32	1.27	0
1	54	2	0	1	0	0	0	90	174	75.8	86	94	0.91	0	0	0	1	1	2	0	25.03	127	71.5	160	4.03	290	5.6	5.6	16	16	49.8	16.2	2.1	78.8	5.79	4.06	141.4	3.78	1.39	2.72	1.24	0
1	54	2	1	1	0	0	0	0	171	79.8	90	100	0.9	0	0	0	0	1	0	0	27.29	115	67	142	4.29	222	5.3	6.2	16	19	48.5	18.3	5.72	87.38	6.02	3.74	130.3	4.92	1.5	3.06	1.09	0
1	54	2	1	1	0	0	0	30	168	65.5	86	93	0.92	0	0	0	2	1	0	0	23.2	126	76.5	149	4.64	269	5.4	6.5	18	23	46.6	11.06	1.1	66	6.34	4.09	140.5	6.54	1.12	5.31	1.08	0
1	54	2	1	1	0	0	0	30	172	73.2	86	105	0.82	0	0	0	1	1	10	0	24.74	124	76.5	155	6.11	156	5.3	5.5	25	19	44.7	19.3	2.2	72	7.2	4.04	142.7	4.11	1.02	2.34	1.3	0
0	54	3	1	1	1	0	0	30	161	63.3	80	118	0.675	0	0	0	0	0	0	0	24.415	127.75	73	121	5.44	234	5.4	5.7	27	26.57	49.7	9.53	1.76	66.7	4.71	4.49	139.3	6.02	0.8	4.2	1.64	0
1	54	3	1	1	0	0	0	30	174	70	87	90	0.96	0	0	0	2	1	0	0	23.12	124.5	76.5	171	4.76	186	5.4	6.3	37	23	47.9	14.92	1.3	63.7	5.93	3.9	141.4	6.34	1.44	4.6	1.2	0
0	54	3	1	1	1	0	0	0	166	60.3	87	95	0.91	0	0	0	2	0	0	0	21.88	125	74	128	10.17	224	5.7	6.9	12	19	44.5	10.6	1.81	49	7.84	3.72	139.8	5.84	2.6	3.51	1.43	0
1	54	3	1	1	0	0	0	0	175	79.8	85	98	0.86	0	0	0	2	1	0	0	26.05	124	76.5	158	5.97	222	5.3	6.7	31	26	51.3	13.26	2.42	65	6.71	3.72	137.3	3.77	1.48	1.6	1.22	0
0	54	3	1	1	0	0	0	60	159	61.9	83	91	0.91	0	0	0	2	1	0	0	24.48	127.75	75.75	144	4.88	285	5.3	6.7	18	18	49.8	13.11	1.29	77	4.72	3.86	141	7.88	3.23	4.84	1.19	0
1	54	3	1	1	0	0	0	30	169	59.7	84	88	0.95	0	0	0	1	1	0	0	20.895	124.5	73.5	163	5.54	194	6.3	6.4	23	29.21	44.7	17.24	3.19	68	5.21	4	137	4.68	1.57	2.84	1.12	0
0	54	2	1	1	0	0	0	40	165.8	67.7	92	108	0.85	0	0	0	2	1	0	0	24.62	126	74	143	6.5	292	6	6.1	24.04	19	46	11.33	1.2	55	5.16	4.25	141.7	4.44	1.48	3.09	1.09	0
1	54	2	1	1	1	0	0	0	175.3	86.4	96	109.5	0.875	0	0	0	0	0	5	1	28.11	137.25	85.5	157	6.9	163	5.5	6.2	24	22	41.8	23.97	6.9	77	6.63	5.05	140.7	4.23	0.95	2.51	1.28	0
1	54	2	0	1	0	0	0	30	180	84.3	90	106	0.87	0	0	0	1	1	0	0	26.01	126.5	78.5	141	6.43	188	5.6	5.8	29.45	30	48.4	10.34	2.01	63.98	6.33	4.33	140	5.85	1.55	4.03	1.17	0
1	54	2	0	1	0	0	0	30	162	65.8	86	92	0.93	0	0	0	1	1	0	0	25.07	122	75	136	7.92	203	5.3	6.9	36	30	49.2	6.48	1.6	94	6.66	4.35	139.7	2.89	1.77	1.49	0.83	0
0	54	2	1	1	1	0	0	0	161	63.4	82	94	0.87	0	0	0	0	1	0	0	24.455	128.75	75.25	151	6.1	347	5.6	7.5	49	32	51.3	7.88	1.6	55.3	6.01	3.96	139.4	4.11	2.27	2.39	1.18	0
1	54	2	1	1	0	0	0	50	166	71	81	93	0.87	0	0	0	1	1	0	0	25.76	121.5	81.25	131	7.01	292	5.6	6.7	20	22	46.3	12.09	1.85	73	3.98	4.13	137	5.7	0.94	3.94	1.3	0
1	54	3	1	1	0	0	0	30	180	74	80	90	0.88	0	0	0	2	1	0	0	22.83	122.5	76.5	128	10.48	306	5.8	5.5	15	15	44.5	6.9	1.61	79.19	4.17	4.23	137	5.51	0.99	4.67	0.96	0
1	54	3	1	1	1	0	0	30	180	90.5	86	90	0.95	0	0	0	1	0	0	0	27.93	127	78.25	159	6.59	245	6	6	17	17	46	7.58	1.7	75	6.66	4.1	136.5	7.11	1.42	5.16	1.29	0
1	54	3	1	1	0	0	0	30	165	66.7	86	91.5	0.94	0	0	0	1	1	0	1	24.495	126.25	80.5	143	5.76	191	5.5	6.1	30	27	42.9	10.9	1.31	81	5.84	3.9	141.6	5.32	1.42	3.58	1.15	0
1	54	2	1	1	0	0	0	30	170	68.8	78	93	0.84	0	0	0	2	1	8	0	23.8	125	73.5	148	5.51	249	5.6	6.5	23	21	49.8	16.2	2	56	5.02	4.09	134.5	4.79	0.81	3.06	1.61	0
0	54	3	1	1	0	0	0	20	162	53	80	95	0.84	0	0	0	2	1	0	0	20.19	137	75.5	125	4.54	227	5.3	6.3	20	24	45.2	8.7	2.98	52	4.01	4.44	139.7	4.45	1.53	2.48	1.57	0
1	54	3	1	1	0	0	0	50	172	68.2	80	93	0.86	0	0	0	1	1	0	0	23.05	126.5	72	151	5.74	220	5.3	5.6	23	22	49.1	13.2	2.56	76.7	6.14	3.7	139.5	6.14	1.38	4.51	1.2	0
1	54	3	1	1	0	0	0	30	180	94	99	110	0.9	0	0	0	1	1	5	0	29.01	123.5	75.5	157	6.45	267	6.4	6.7	73	37	46.1	13.51	1.76	97	4.62	4.41	138.4	4.89	1.39	2.96	1.31	0
1	54	3	1	1	0	0	0	20	176	95	98	99	0.98	0	0	0	2	1	0	0	30.66	119	69	162	4.95	204	5.4	6.1	48	25	47.9	14.23	1.4	69	3.53	2.81	138.5	6.14	1.24	5.04	0.98	0
1	54	3	1	1	0	0	0	30	173	80	86	106	0.81	0	0	0	2	1	0	0	26.72	130	74.5	152	6.07	218	5.8	6.1	54	38	46	15.3	2.02	52.51	6.01	4.26	137.9	5.77	0.8	3.67	1.75	0
0	54	3	1	1	0	0	0	30	155	49.1	76	93	0.815	0	0	0	1	1	0	0	20.435	123.25	73	118	6.63	296	5.7	6.2	9	20	45	6.6	1.4	50.03	5.61	4.57	138.7	4.98	0.99	2.87	1.69	0
0	54	2	1	1	1	0	0	30	159	62.8	80	95.5	0.94	0	0	0	2	0	0	0	24.84	123.5	75.5	129	6.26	261	5.4	6	18	20	48.7	11.4	2.08	58	5.59	4.05	138	3.28	0.86	1.11	1.56	0
0	54	3	1	1	0	0	0	0	163	64.8	85	90	0.94	0	0	0	0	1	0	0	24.38	124.5	76	137	7.03	193	6.1	8	52	56.14	48.4	23.97	5.8	107.7	5.99	4.47	141.3	6.54	2.36	4.35	1.51	0
0	54	3	1	2	1	0	0	30	165	65	83	90	0.8	0	0	0	1	0	0	0	23.87	131.5	76	135	5.76	291	5.4	6.2	17.69	19	49.8	11.89	1.3	54.4	3.67	3.86	142.2	3.95	0.83	1.63	1.43	0
1	54	2	1	1	0	0	0	30	163	69.2	80	94	0.85	0	0	0	2	1	0	0	26.04	124.5	73.5	150	6.97	171	6.2	6.1	27	28	49.2	11.25	2.1	82.2	4.61	3.9	137.7	4.38	1	3.01	1.27	0
1	54	2	1	0	0	0	0	0	177	83	82	98	0.83	0	0	0	0	1	0	0	26.49	127.5	75.5	157	5.8	179	5.9	6.2	23	20	43.9	11.3	1.44	71.23	4.1	4.21	130.3	6.44	1.3	5	1.2	0
1	54	3	1	1	0	0	0	30	173	91	95	103	0.92	0	0	0	1	1	0	0	30.4	129	74	171	4.84	206	5.3	5.5	31	28	51.3	12.3	1.42	64	4.35	3.53	139.4	5.65	3.24	3.74	0.81	0
1	54	2	1	1	1	0	0	30	167	64.2	75	80	0.93	0	0	0	2	1	0	0	23.015	129.5	79	132	5.23	125	6.3	5.8	14	20	45.3	9	1.8	94.8	8.12	3.88	138.2	4.94	1.37	2.56	1.48	0
1	54	3	1	1	1	0	0	30	173	64.45	80.5	88.5	0.905	0	0	0	1	1	3	1	21.53	131.75	81.75	157	5.8	269	6	6.4	14.93	20	46	13.68	0.8	65.73	3.5	3.47	137.7	7.1	1.11	5.16	1.38	0
0	54	2	1	1	0	0	1	40	162	65.6	80	100	0.8	0	0	0	1	1	0	0	24.99	129.5	76	131	5.98	383	6	6.4	35	27	46.35	6.07	0.9	70	8.79	4.6	138	7.63	2.05	5.44	1.58	0
0	54	3	1	1	0	0	0	30	160	50.5	75	85	0.88	0	0	0	1	1	0	0	19.725	129.25	75	147	6.93	169	6.3	6	14	19	48.36	17.66	2.26	51	4.44	4.3	136.5	7.01	1.81	4.16	2.03	0
1	54	2	1	1	1	0	0	15	164	81.5	96.5	104	0.88	0	0	0	1	0	0	0	30.3	125	79	157	6.73	242	6.6	7.8	20	20	49.8	14.65	2.66	93	8.35	4.32	136.9	5.44	3.34	2.77	1.1	0
1	54	3	1	1	0	0	0	30	175	79.25	85	95	0.89	0	0	0	2	0	0	0	25.87	128.5	78.75	142	6.25	221	6.3	6.1	20	19	49.1	12	1.21	70	7.58	4.47	137.4	3.09	0.78	1.75	1.18	0
0	54	3	1	1	0	0	0	30	159	55.8	74	82	0.9	0	0	0	1	1	0	0	22.07	119	79	148	6.18	319	5.9	5.5	7	17	47	13.86	2.1	49	4.85	4.08	138	5.21	1.22	3.41	1.33	0
1	54	2	1	1	0	0	0	30	169	70.35	92	102	0.9	0	0	0	1	0	0	0	24.625	124.75	74.25	144	6.21	317	5.7	6.4	28	23	45.9	10.22	2.8	110	5.83	4.46	137	5.76	1.66	3.59	1.02	0
1	54	3	0	1	0	0	0	30	169	86.1	87	108	0.9	0	0	0	1	1	0	0	30.145	120.75	76.75	158	5.99	228	5.2	6	30	21.63	48	13.74	2.2	69	6.6	4.17	139.7	4.86	1	3.26	1.29	0
0	54	3	1	1	0	0	0	50	162	84.5	99	103	0.96	0	0	0	1	1	0	0	32.195	128.75	79.25	130	5.46	265	6.1	6.7	16	15	46.5	11.17	1.7	60	4.03	4.37	140.7	4.71	2.5	2.94	0.82	0
1	54	3	1	1	0	0	0	30	177	72.5	82	94	0.87	0	0	0	1	1	0	0	23.14	126	77	145	5.7	237	5.6	6	39	29	46.6	10	1.17	67.3	6.36	3.96	138.8	3.88	3.11	1.35	1.01	0
0	54	3	1	1	0	0	0	0	157	66.4	85	90	0.94	0	0	0	0	1	0	0	26.93	124	75.5	146	5.2	306	5.8	6.9	21	20	47.6	11	2.17	48	5.23	4.19	139.5	3.43	1.28	2.13	0.86	0
0	54	3	1	1	0	0	0	30	163	56	82	96	0.77	0	0	0	2	1	0	0	21.07	126.5	75.5	122	5.6	274	5.8	6.2	44	30	43.5	6	1.4	54.5	4.59	4.49	139.02	5.76	1.65	3.34	1.82	0
0	54	2	1	1	0	0	0	30	160	55.9	62	85	0.69	0	0	0	1	0	0	0	21.83	123	75.5	124	5.21	186	5.3	6.2	14	18	44.5	8.1	1.29	47	6.23	4.16	140.4	6.85	0.68	4.78	1.97	0
0	54	3	1	1	0	0	0	30	162	65	84	93	0.9	0	0	0	1	1	0	0	24.76	124.75	78.75	133	5.24	212	6	7.6	41	2	43.3	26.25	7.18	56.11	6.06	3.73	142.4	4.4	2.58	1.52	1.67	0
1	54	2	1	0	0	0	0	20	175	74.15	86	96	0.895	0	0	0	1	1	0	0	24.21	121.75	76.25	149	6.1	245	5.9	6.2	32	26	46.1	10.92	1.53	79	4.81	3.82	139.5	3.44	1.13	2.26	1.06	0
1	54	2	1	1	0	0	0	40	176	78.2	84	93	0.9	0	0	0	1	1	10	1	25.24	124	73.5	146	4.87	241	5.4	5.8	12	18	46.9	23.04	2.75	84.4	4.17	4.84	138.5	6.13	1.66	4.5	1.15	0
0	54	2	0	1	0	0	0	30	158	60	80	90	0.88	0	0	0	2	1	0	0	24.03	129.5	79	135	4.86	179	5.9	6	15	17	42.5	10.8	1.24	69	4.11	4.52	138.5	6.32	1.54	4.53	1.35	0
0	54	2	0	1	0	0	0	30	160	58.2	83	92	0.9	0	0	0	2	1	0	0	22.73	123	76.5	133	6.17	317	6.1	6.5	10	12	46	6.5	1.4	72	7.02	4.86	141	7.77	3.76	5.5	1.11	0
1	54	3	1	1	0	0	0	30	172	69.7	84	97	0.87	0	0	0	1	1	0	0	23.56	122.5	72.5	145	4.75	232	5.3	6.9	49	28	51	8.4	1.2	59.7	3.71	4.11	138.7	4.19	2.17	2.56	0.86	0
0	54	2	0	0	0	0	0	0	160	60	68	84	0.96	0	0	0	0	1	0	0	23.43	121	68	113	4.69	224	5.9	5.9	11	16	47.9	9	1.89	53.51	6.71	4.86	137.4	6.16	0.63	4.67	1.48	0
1	54	3	1	1	0	0	0	30	170	86.3	95	109	0.87	0	0	0	1	1	9	0	29.855	126.25	75.25	148	4.79	204	6.3	6.6	17	15	49.3	13.37	3.4	84.8	4.8	4.02	133.1	3.21	0.89	1.43	1.09	0
1	54	3	1	1	0	0	0	0	172	60	85	92	0.89	0	0	0	0	1	0	0	20.28	120.5	71	126	5.6	187	5.5	6.4	12	16	34.08	6.21	2.81	72	5.66	4.24	138.7	4.77	0.99	3.21	1.02	0
1	54	3	1	1	0	0	0	30	174	73.2	75	88	0.85	0	0	0	1	1	0	0	24.17	123.75	73.75	141	6.37	268	6	6.4	20.11	20	48.5	14.7	2.81	90.9	4.39	3.91	139	5.76	0.72	3.18	2.02	0
1	54	2	1	1	0	0	0	30	176	72.3	83	94	0.89	0	0	0	1	1	0	0	23.34	126	75	153	5.24	166	5.6	5.8	29	19	50.1	8.98	0.7	61	4.3	3.69	140	2.68	0.96	1.32	1.01	0
0	54	3	1	1	0	0	0	0	163	70.9	78	88	0.88	0	0	0	0	0	0	0	26.68	125	76	136	6.42	261	6	6.9	12	17	48.2	12.67	2.58	42.4	6.19	4.4	137.7	5.57	1.29	3.84	1.15	0
0	54	3	0	1	0	0	0	30	165	98	110	120	0.91	0	0	0	2	1	0	0	35.99	129	70.5	135	6	271	6.1	6.5	18	18	50.3	9.07	1.44	65	6.24	4.2	140.4	4.27	1.99	2.38	1.16	0
1	54	2	1	1	1	0	1	0	170	71.8	82	88	0.86	0	0	0	0	0	5	1	24.84	124	73.5	151	6.5	207	6.1	6.2	27	22	47.9	9	1.74	65.9	7.09	4.21	137	4.76	2.1	2.74	1.16	0
0	54	3	1	2	0	0	0	0	157	65.5	82	100	0.82	0	0	0	0	0	5	1	26.57	124	75.5	132	4.84	199	5.6	6.8	47	38	43.9	17.7	3.87	58.74	3.31	5.05	140.3	5.02	0.96	2.93	1.69	0
1	54	2	1	1	0	0	0	30	176	79.45	94	102	0.92	0	0	0	1	1	0	0	25.645	127.25	73.75	161	4.02	267	5.7	5.9	20	18	51.3	18.11	3.53	89	6.36	4.92	142.2	3.86	1.45	2.3	1.32	0
1	54	2	0	1	0	0	0	30	172	68	85	98	0.86	0	0	0	2	1	0	0	22.98	117.5	77	154	7.09	157	5.6	5.6	18	17	46.1	13.2	2.67	81.6	4.68	3.72	138.9	3.6	0.78	1.92	1.11	0
1	54	2	1	1	0	0	0	30	176	76.75	77	86	0.895	0	0	0	1	1	0	0	24.77	126.5	73.75	149	6.24	205	6.1	5.7	58	35	48.4	11.1	1.63	103	6.38	3.92	139.4	6.8	2.06	5.04	0.91	0
0	54	2	1	1	0	0	0	30	152.9	60.4	78	89	0.88	0	0	0	1	1	0	0	25.83	127	84	131	6.23	254	6.24	6.2	21.15	25	48.46	9.6	1.2	35.4	4.14	3.69	141.2	4.6	3.23	2.75	0.96	0
1	54	2	1	1	1	0	0	30	166.5	71.4	88	98	0.895	0	0	0	1	0	0	0	25.755	120.75	72.75	152	5.48	221	5.9	5.9	12	21	48.4	13.44	2.2	79	6.92	4.13	137.5	3.67	0.49	1.94	1.42	0
1	54	3	1	1	0	0	0	30	178	74.75	88	101.5	0.865	0	0	0	2	1	0	0	23.59	130.75	83.25	160	3.7	143	5.9	5.8	13	17	46.6	13.8	2.4	91.5	6.95	4.31	137.5	5.32	2.1	3.56	1.17	0
0	54	3	0	1	1	0	0	30	157	64	80	89	0.89	0	0	0	2	1	0	0	25.96	119.5	73	117	5.25	308	5.2	6.9	10	12	46.4	7	1.4	38	6.56	4.75	120	7.24	0.96	4.97	1.7	0
0	54	3	1	1	1	0	0	0	165	67.8	84	97	0.91	0	0	0	0	0	0	0	24.9	125	73.5	141	3.96	297	5.4	6.5	29	22	49.1	7	1.1	60.4	4.35	4.1	142.2	4.55	2.9	2.47	1.07	0
1	54	3	1	1	0	0	0	30	170	68.3	84	92	0.91	0	0	0	1	1	0	0	23.63	131	82	149	5.78	226	5.5	6.4	16	17	48.36	15.4	2.4	87	6.13	3.81	138.7	4.15	2.27	2.47	1.08	0
1	54	3	0	1	0	0	0	30	178	73.6	100	104	0.9	0	0	0	2	0	0	0	23.22	124.5	72.5	128	4.95	242	5.8	5.9	25	20	47.7	10.3	1.8	56.9	6.01	4.2	137.3	3.43	0.82	1.59	1.38	0
0	54	3	1	1	1	0	0	30	160	51.8	80	78	1.02	0	0	0	2	1	0	0	20.23	124	75	125	4.62	182	5.6	6.9	17	30	46.7	13	1.2	57	5.49	3.96	143.3	6	0.93	4.78	1.41	0
1	54	3	1	1	0	0	0	30	174	71.1	89	90	0.985	0	0	0	2	1	0	0	23.48	127.75	73.75	158	4.77	132	5.7	5.8	14	16	45.9	7.6	0.9	142.8	6.49	4.7	140.9	7.2	2.23	5.43	1.2	0
1	54	3	1	1	1	0	0	30	178	82.5	91	100	0.91	0	0	0	1	1	0	1	26.03	127	73.5	172	7.9	240	5.8	6.1	6	13	49.8	13.3	2.68	80.6	6.75	3.86	139.6	5.53	2.52	3.64	0.97	0
0	54	2	1	1	0	0	0	0	160	70.2	83	94	0.88	0	0	0	0	1	0	0	27.42	121	73.5	139	4.99	233	5.7	6.2	25	22	46.6	6.71	1.7	50.3	5.47	4.39	137.41	4.2	3.04	1.89	1.25	0
1	54	2	1	1	0	0	0	30	180	70	83	94	0.9	0	0	0	2	1	0	1	21.6	125	77.5	146	6.58	243	5.6	5.9	13	13	47.9	11	1.7	64.3	5.51	4.22	142.1	5.82	4.08	3.48	0.76	0
1	54	2	1	1	0	0	0	50	175	86.85	97	106	0.91	0	0	0	1	1	0	0	28.355	131.25	77.75	161	4.5	210	5.9	6.9	31.61	19	45.6	19.4	2.35	60	5.34	2.81	139	6.29	0.67	4.33	1.26	0
1	54	3	1	1	0	0	0	30	167	60.3	80	92	0.86	0	0	0	1	1	0	0	21.62	125.5	75.75	148	4.99	176	5.8	5.9	16	16.16	47.2	14.1	2.8	72.3	4.39	4.17	130.3	5.45	1.46	3.78	1.19	0
0	54	3	1	1	0	0	1	30	160	61.2	76	88	0.86	0	0	0	2	1	0	0	23.9	127.5	65	129	5.8	241	5.3	5.6	32	22	49.9	11.9	0.91	62.2	10.47	4.73	139.8	6.75	1.32	4.61	1.8	0
1	54	2	0	1	0	0	0	30	163	74.75	90	110	0.81	0	0	0	1	1	10	0	28.125	124.5	76.5	161	7.46	191	5.4	6	18	18	46.2	10.6	2.2	87.2	6.96	4.37	130.3	3.79	0.89	2.52	1.24	0
1	54	2	1	1	0	0	0	30	170	79.8	88	96	0.91	0	0	0	2	1	7	0	27.61	123.5	73.5	150	7.09	179	5.3	6.9	92	39	46.9	11.1	1.28	96	5.38	4.39	142.4	4.32	1.23	2.95	0.91	0
0	54	3	1	1	0	0	1	60	157	78.1	93	106	0.88	0	0	0	1	1	0	0	31.68	128.5	76.5	126	5.82	315	5.3	6.5	38	30	43.2	7.2	1.1	61.7	6.05	4.26	142	4.31	3.18	1.63	1	0
0	54	2	0	1	0	0	0	30	160	57.5	74	83	0.89	0	0	0	1	1	0	0	22.46	124	75	140	8.24	199	5.6	6.2	22	16	48.5	10.1	1.48	60	4.86	4.47	138.2	4.95	1.87	3.17	0.93	0
1	54	2	1	1	0	0	0	30	180	72.35	83	94	0.88	0	0	0	1	1	0	0	22.325	124.5	73.5	149	4.21	268	5.4	5.6	27	15	44.7	14.7	1.57	92	7.62	4.15	139.1	4.55	0.58	2.2	1.67	0
0	54	3	1	1	0	0	0	0	165	56.35	78	94	0.82	0	0	0	1	0	0	0	20.695	128.5	77	135	5.25	271	5.3	6.2	15	20	43.9	14.15	1.8	51.2	4.14	4.5	141.9	6	0.56	4.04	1.54	0
0	54	2	1	1	0	0	0	30	162	62.7	75	90	0.89	0	0	0	1	1	0	0	23.885	122.75	74.75	128	7.23	353	5.3	6	26	23	48.07	6.45	1.33	54	3.95	4.39	135.9	4.92	0.66	3.5	1.4	0
0	54	3	1	1	0	0	0	0	170	75.7	82	100	0.82	0	0	0	0	1	0	0	26.19	124.5	76.5	132	5.19	226	5.2	6.1	27	18	45.33	6.82	1.4	65.5	4.52	4.1	140.7	3.24	1.63	1.34	1.09	0
1	54	3	1	1	1	0	1	30	184	91.5	90	105	0.75	0	0	0	1	1	0	0	27.02	132	71	157	8.17	280	5.5	5.9	25	21	46	9.42	1.7	86	5.56	3.53	138.7	3.41	1.18	1.91	1.13	0
1	54	2	0	1	0	0	0	30	180	89	90	100	0.9	0	0	0	2	1	0	0	27.46	122.5	80	169	7.04	201	5.6	5.6	22	21.1	46.6	13.86	2	96	7.08	3.91	141.6	5.08	3.03	2.91	0.86	0
1	54	3	1	1	0	0	0	15	175	75.8	76	84	0.9	0	0	0	1	1	0	1	24.75	124.5	73.5	142	6.85	248	5.1	5.9	19	19	48	15.53	2.1	77.9	5.1	3.96	138.8	4.86	1.66	2.76	1.29	0
1	54	2	1	1	0	0	0	60	167	74.9	80	85	0.94	0	0	0	2	1	3.5	1	26.855	126.75	78.25	159	6.78	204	6.3	6.1	39	31.58	41.8	12.6	3.18	72.75	4.29	4	141.9	3.72	1.01	1.87	1.52	0
1	54	3	1	1	0	0	0	0	168	75	105	110	0.95	0	0	0	0	1	0	0	26.57	124.5	75.5	118	9.16	161	5.6	6.5	24	32	44.7	22.43	6.48	77	3.14	4.46	137.3	3.91	2.38	1.92	0.69	0
0	54	2	1	1	0	0	0	50	155	59.3	80	90	0.91	0	0	0	1	1	0	0	24.68	123.5	71.5	110	8.26	273	6.3	6.8	11	17	48.7	7.98	1.3	69.7	5.41	4.57	138.2	3.57	1.27	1.94	1.29	0
0	54	3	1	1	1	0	0	30	155	54.2	69	82	0.84	0	0	0	2	1	0	0	22.55	132	82	119	8.12	174	5.6	6.4	18	28	43.5	13.04	1.3	72.8	3.71	3.69	141.1	6.43	1.25	4.13	2.06	0
1	54	3	1	1	1	0	0	30	175	81.8	84	95	0.88	0	0	0	1	0	0	0	26.71	123	74.5	149	7.49	256	5.9	6.4	37	34.01	46.6	11.71	1.8	97	9.62	4.4	140.6	5	1.69	3.3	0.84	0
0	54	3	1	1	1	0	0	0	163	62.45	84	95	0.88	0	0	0	1	1	0	1	23.5	129	77.25	142	2.82	195	6.3	6	13	21	49	16.23	1.44	72.6	6.24	3.73	142.4	6.13	1.61	3.86	1.76	0
1	54	3	1	1	0	0	0	30	176	75	90	110	0.81	0	0	0	2	1	4	0	24.21	120.5	79	156	3.86	263	5.4	6	23	27	49.7	23.9	3.11	89.6	7.13	4.74	133	4.89	1.6	3.26	1.5	0
0	54	2	1	1	0	0	0	20	158	56.7	73	83	0.875	0	0	0	1	1	0	0	22.71	124.25	73	133	5.64	283	5.4	6.6	11	17	48.2	6.96	1.35	65	6.31	4.35	140.6	3.72	0.58	2.74	1.16	0
0	54	2	1	1	0	0	0	50	165.5	81.9	82	97	0.845	0	0	0	1	1	0	0	29.9	125	74.75	150	7.22	446	5.2	6.4	26	16	47.9	6.45	1.7	82.4	7.84	4.4	140.2	6.69	1.68	5.22	1.12	0
0	54	3	1	2	1	0	0	30	161	63.8	78	93	0.83	0	0	0	2	1	0	0	24.61	124.5	75.5	147	4.52	167	5.6	6.4	29	23	49.7	14.53	1.1	61.9	7.12	3.65	138.9	5.79	1.36	3.74	1.45	0
0	54	3	1	1	0	0	0	40	159	65.5	80	85	0.94	0	0	0	1	1	0	0	25.905	127.5	75.75	124	6.61	268	6.2	13	20	21	47.9	8.2	3.55	62	6.13	4.27	141.3	4.84	1.66	3.25	1.17	0
1	54	2	1	1	0	0	0	50	183	82.4	83	91	0.91	0	0	0	2	1	0	0	24.6	124.75	75.75	138	4.51	100	5.3	5.4	16	18	46.8	12.5	1.4	88	7.43	4.39	139.2	6.26	2.54	4.41	1.06	0
0	54	3	0	1	0	0	0	0	165	65.7	82	89	0.92	0	0	0	0	1	0	0	24.13	125	76	121	6.71	306	5.4	6.1	12	17	43.6	9.8	1.54	47.7	4.44	4.2	138.9	5.76	2.2	2.43	1.99	0
1	54	2	1	1	0	0	0	30	174	88.5	93	100	0.93	0	0	0	1	1	0	0	29.225	127.25	75.75	148	8.66	159	5.3	6.2	48.1	32	51	12.28	1.71	73	4.6	4.21	137.7	3.88	1.37	2.23	1	0
1	54	3	1	1	0	0	0	20	172	75.5	80	86	0.93	0	0	0	1	1	0	0	25.515	128.75	73.25	161	5.52	201	5.2	6	24	22	46.6	14.7	1.86	77	3.5	3.77	140.3	4.09	1.26	2.99	0.99	0
1	54	3	1	1	0	0	0	30	172	70.7	75	89	0.88	0	0	0	2	1	5	0	23.89	124.5	75.5	140	7.09	194	5.9	5.9	25	25.04	48.2	6.7	1.22	70	4.76	4.08	137	6.57	3.12	4.11	1.1	0
1	54	3	1	1	0	0	0	0	172	80.6	91	96	0.95	0	0	0	0	1	0	0	27.24	126	72.5	147	7.31	136	5.6	6.4	33	24	46.7	15.02	1.5	84.4	5.11	2.81	142	4.04	2.01	2.32	0.79	0
0	54	2	0	1	0	0	0	30	160	52	68	70	0.97	0	0	0	2	1	0	0	20.31	120.5	72.5	148	5.39	223	5.8	5.9	14	17	49.1	16.9	2.1	66	6.48	4.58	140.4	4.92	1.51	2.26	1.7	0
1	54	3	1	1	0	0	0	20	167	74.25	86	93	0.92	0	0	0	2	1	20	0	26.62	125.5	74.5	151	5.87	232	5.7	5.8	12	14	43.8	9.81	1.8	87	6.13	4	140.5	4.15	1.45	2.13	1.04	0
1	54	3	1	1	0	0	0	30	168	82.8	100	108	0.92	0	0	0	1	1	0	0	29.33	123.5	76.5	151	6.69	316	5.7	5.7	23	18	52.2	12.51	1.8	61	5.21	4.33	134.5	5.84	1.77	3.91	0.95	0
1	54	3	1	1	0	0	0	50	179.5	71.05	81	92	0.88	0	0	0	1	1	0	0	22.05	123.5	72.75	147	3.57	200	5.6	5.5	16	25	45.9	19.5	2.5	76.86	5.51	4.52	136.5	6.77	0.55	4.45	1.87	0
0	54	3	0	1	0	0	0	30	168	81.65	85	96	0.89	0	0	0	1	1	0	0	28.925	123.25	75	126	5.26	143	6	5.8	20	20	47.24	6.97	1.1	63	23	4.98	142.4	3.8	2.36	2.23	0.95	0
1	54	2	1	1	0	0	0	40	177	79.35	90	103	0.87	0	0	0	1	1	10	0	25.325	126.5	74	152	5.8	236	5.2	6.2	22	24	48.7	9.7	1.6	83	4.32	4.29	136	4.85	1.08	3.5	1.04	0
1	54	2	0	1	0	0	0	0	180	92.4	110	130	0.88	0	0	0	0	1	0	1	37.71	125.25	73.25	137	8.16	327	5.7	5.5	12	14	44.7	6.5	0.44	115.7	5.54	4.55	144.1	3.83	2.47	2.25	0.85	0
0	54	2	1	1	0	0	0	20	160	69.4	88	103	0.85	0	0	0	1	1	0	0	27.105	129.25	75	134	5.57	269	6.3	6.9	27	17	49.67	10.39	0.4	42	4.14	4.47	140.5	4.84	1.2	3.47	1.15	0
1	54	2	1	1	0	0	0	30	167	86	96	110	0.87	0	0	0	2	1	0	0	30.83	123	77	144	6.23	256	5.9	6.1	23	15	45.5	8.21	1.7	79	4.96	3.67	141.3	3.59	0.4	1.71	1.51	0
0	54	3	0	1	0	0	0	30	154	51	72	80	0.9	0	0	0	1	1	0	0	21.5	133	85	133	5.83	225	6.2	6.1	14	16	47.5	11.22	1.3	75	5.51	5.13	138	6.03	0.73	4.1	1.83	0
0	54	2	1	1	1	0	0	0	160	94.2	97	117	0.825	0	0	0	0	0	0	0	36.795	121.5	72.75	145	7.28	313	5.9	6.4	25	19	51.3	5.96	1.8	68	5.46	4.5	141.3	6.09	4.08	3.1	1.13	0
1	54	3	1	1	1	0	1	0	177	71.4	93	110	0.84	0	0	0	2	1	0	0	22.79	121	72	152	4.99	224	5.9	6	33	24	51.4	11.72	1.7	43.4	3.48	3.53	140.7	3.44	0.81	2.09	1.09	0
1	54	2	1	1	0	0	0	30	174	77.8	88	100	0.88	0	0	0	1	1	0	0	25.69	125.25	74.75	152	4.58	225	6.2	6.7	27	27	48.4	14.82	3.58	72.7	4.62	4.33	130.3	4.77	0.71	3.07	1.31	0
0	54	2	1	1	0	0	0	30	169	65.75	80	85	0.94	0	0	0	1	1	0	0	23.015	124.5	75.75	145	5.66	228	5.4	6.2	22	18	46.6	15.7	1.53	57.2	3.97	3.82	141.5	3.79	2.24	2.12	1.19	0
0	54	2	1	1	0	0	1	50	166.5	71.05	100	114	0.875	0	0	0	1	1	0	0	25.62	122.75	72.5	142	6.81	313	5.9	6.4	17	21	49.8	13.35	0.8	72	5.65	4.01	139.7	7.22	1.36	5.65	0.84	0
1	54	2	1	1	0	0	0	5	181	97.7	95	105	0.9	0	0	0	1	1	10.5	2	29.82	123	74.5	161	5.52	254	5.9	6.3	35	16	49.9	25.62	5.6	57	6.19	4.2	139.6	5.6	1.32	3.74	1.27	0
0	54	3	0	1	0	0	0	0	165	67.5	85	100	0.85	0	0	0	0	1	0	0	24.79	119	71.5	133	5.47	251	5.9	5.8	12	17	49.1	10.93	1.6	61	5.9	4.12	140.3	4.64	0.7	3.74	0.99	0
1	54	2	1	1	0	0	0	0	173.5	71	84	94	0.89	0	0	0	2	1	0	1	23.59	136.75	91.25	143	6.43	213	5.7	6.1	19	29	46.1	8.86	2	86	4.81	4.11	140	4.18	1.61	1.71	1.59	0
0	54	2	1	1	0	0	0	30	155	65.8	78	80	0.97	0	0	0	2	1	0	0	27.38	123.5	75	142	5.51	156	5.2	6.4	36	25	45.3	15.49	2.74	46	5.18	4.32	140.3	4.55	1.08	2.96	1.3	0
1	54	3	1	1	0	0	0	30	178	95	92	96	0.95	0	0	0	2	0	0	0	29.98	124.5	76.5	152	4.36	205	5.5	6.3	21	18	49.9	23.1	3.87	44.1	4.3	3.73	139.3	3.45	1.91	1.56	0.8	0
0	54	2	1	1	0	0	0	30	166	77.3	87	93	0.94	0	0	0	1	1	0	0	28.05	124	72.5	121	8.13	321	5.6	7.6	17	23	49.8	19.5	4.3	68	4.07	4.84	140.7	4.55	2.7	2.63	1.15	0
0	54	2	0	1	1	0	0	30	165	80	100	110	0.9	0	0	0	2	0	0	0	29.38	122.5	74.5	139	3.83	210	5.6	6	20	20	48.1	7.7	1.3	62.1	6.4	3.73	142.6	6.4	1.93	4.65	1.12	0
0	54	2	1	1	0	0	0	0	163	69.8	83	86	0.96	0	0	0	0	1	0	0	26.27	124	76	138	6.68	319	5.5	6.7	19	20	46.2	7.3	1.63	62	21	4.55	142	6.05	2.07	3.95	1.21	0
0	54	3	1	1	0	0	1	30	165	62.3	78	89	0.88	0	0	0	1	1	0	0	22.88	132	75	146	5.75	369	6.4	6.5	17	16	48.4	13.14	1.26	38	4.25	4.41	130.3	5.95	1.71	3.65	1.3	0
0	54	2	1	1	1	0	0	30	156	65.85	83	100	0.83	0	0	0	1	1	0	0	27.055	123	78.75	145	5.94	226	5.3	5.9	16	15	46.1	10.7	2.5	51	7.07	4.19	142.6	3.28	2.13	1.35	1.19	0
1	54	3	1	1	0	0	0	30	178.5	79.65	83	95.3	0.87	0	0	0	1	1	0	1	24.995	129.25	78.25	161	6.04	175	5.3	4.1	17	19	51.3	23	4.15	91.2	6.41	4.2	140	5	1.33	2.63	1.36	0
0	54	3	1	1	0	0	0	30	160	55.5	82	95	0.86	0	0	0	1	1	0	0	21.67	124.5	75	127	5.57	178	6	5.8	14	18	42.9	6.05	0.9	54	5.63	4.07	139.9	4.82	1.76	3.15	1.39	0
0	54	2	1	1	0	0	0	20	160	87.9	94	110	0.85	0	0	0	1	1	0	0	34.335	122	72.75	142	5.85	242	5.9	6.7	26	18	47.9	10.6	1.7	59.5	4.05	4.36	142.7	4.07	0.6	2.74	1.1	0
1	54	3	0	1	0	0	0	30	181	96	86	96	0.89	0	0	0	2	1	0	0	29.3	120.5	71	144	6.42	177	6.1	6	25	20	47.65	20.02	3.6	84.8	6.01	3.73	133.4	3.8	1.07	1.79	1.15	0
1	55	2	0	1	0	0	0	0	170	78	84	98	0.85	0	0	0	0	1	5	0	26.98	122	71.5	158	10.06	180	5.7	6.4	45	43	48.4	14.55	6.3	59.6	5.24	4.74	137.3	3	1.33	1.55	1.07	0
1	55	2	1	1	0	0	0	50	172	84.65	88	99	0.885	0	0	0	1	1	0	0	28.605	124	71.5	144	6.68	208	6.4	6.5	27	23	46.2	16.3	5.06	80	5.8	3.68	138.6	3.26	0.56	1.2	1.34	0
1	55	3	1	1	0	0	0	30	178	80.95	87	97	0.895	0	0	0	2	1	1	1	25.545	124.5	74.5	156	5.5	267	5.9	6.4	38	27	49	21.49	4.23	70.5	4.59	4.23	140.7	5.82	1.9	3.68	1.6	0
0	55	2	0	1	0	0	0	30	167	71.65	86	97	0.885	0	0	0	2	1	0	0	25.69	121.25	75.75	125	6.69	237	5.8	6	15	20	47.5	8.4	1.1	41	4.87	4.24	141.9	7.06	3.15	3.64	1.58	0
0	55	2	1	0	0	0	0	40	163	64.6	80	92	0.87	0	0	0	2	1	0	0	24.31	121.5	68.5	131	6.94	254	5.8	5.9	16	17	44.5	8.71	1.4	51.4	5.54	4.58	139.3	4.86	1.8	3.24	1.11	0
0	55	2	1	1	0	0	0	40	160	64.35	82	88	0.93	0	0	0	2	0	0	0	25.135	126	78	130	5.55	282	5.5	6.1	22	20	45.33	8.37	1.3	66.6	4.92	4.28	135.6	6.26	2.39	4.56	1.03	0
1	55	3	0	1	1	0	0	30	175	73.6	87	99	0.87	0	0	0	1	0	0	0	24.03	127.75	77.5	147	5.41	182	6	5.7	30	20	45.9	7.6	0.9	81.6	3.33	4.18	140	6.45	3.66	4.28	1.02	0
1	55	3	1	1	0	0	0	30	178	87.5	92	101	0.91	0	0	0	1	0	0	0	27.61	125.25	74.5	148	5.91	198	5.9	6.8	39	23	46.2	13	2.3	83	5.89	3.73	135.8	6.12	1.8	4.26	0.91	0
0	55	2	1	1	0	0	0	0	156	56.5	89	98	0.9	0	0	0	0	1	0	0	23.21	123.5	72.5	136	5.38	265	5.3	5.9	9	13	49.1	8.66	1.7	53	5.02	3.94	140.7	3.39	2.05	1.22	1.11	0
0	55	2	0	1	1	0	0	30	150	56.6	80.3	85	0.94	0	0	0	0	1	0	0	25.15	124.25	74.75	112	5.66	252	5.3	7	19	20	46.6	6	1.28	59.8	5.15	4.43	137.41	4.82	0.99	3.5	1.08	0
0	55	3	1	1	0	0	0	30	160	72	80	90	0.88	0	0	0	2	1	0	0	28.12	120.5	79.5	133	7.35	305	5.8	7.2	27	27	48.85	16.64	3.1	47.46	7.84	4.47	139.7	3.77	1.12	2.25	1.35	0
1	55	2	1	1	0	0	0	30	182	84	90	103	0.87	0	0	0	2	1	5	1	25.35	123.5	74.5	136	4.79	346	5.7	6.2	10	19	49	12.1	2.13	68	4.38	4.36	139.8	6.25	1.74	4.37	1.23	0
0	55	2	1	1	0	0	0	30	162	64.8	85	95	0.89	0	0	0	2	1	0	0	24.69	124.5	75	131	7.14	190	5.9	6	14.8	23	47.2	10.04	1.8	47	8.31	4.57	137.41	5.52	2.24	3.41	1.19	0
1	55	2	0	1	0	0	0	30	169	64.25	82	89	0.92	0	0	0	1	1	7.5	1	22.49	125.5	70.25	158	5.57	277	5.2	6	21	14	44	9.8	2.98	68.8	4.98	4.61	138.4	5.39	0.75	4.24	1.06	0
0	55	3	1	1	0	0	0	20	164	66.8	76	84	0.9	0	0	0	2	1	0	0	24.83	116.5	75.5	128	5.36	266	5.4	6.2	28	25	45.3	7.5	1.2	72.6	3.88	4.47	141.5	5.08	1.16	2.77	1.46	0
1	55	3	0	1	1	0	0	30	171	65.1	89	105	0.84	0	0	0	1	0	0	0	22.255	129.75	77	154	5.3	164	5.3	5.4	15	18	44.7	14.16	1.37	53	6.37	4.12	140.4	5.07	0.74	2.9	1.63	0
1	55	3	1	1	0	0	0	30	172	71.3	87	98	0.885	0	0	0	1	1	0	0	24.095	121.75	73.5	141	4.83	200	6.1	5.9	12	18	51.7	18.52	4.2	75	3.08	3.95	137.8	4.17	1.3	1.89	1.51	0
0	55	2	1	1	0	0	0	30	160	63.6	83	93	0.89	0	0	0	2	1	0	0	24.84	128	71.5	134	6.06	267	6.6	5.8	21	22.06	45.6	7.48	0.91	51	5.47	4.46	138.9	5.32	2.1	2.34	1.69	0
0	55	2	1	1	0	0	0	30	158	65.7	90	100	0.9	0	0	0	2	1	0	0	26.31	123.5	74.5	136	9.28	233	5.3	6	29	25	47.2	11.86	2.5	66	5.22	3.99	139.9	4.44	2.03	2.07	1.43	0
1	55	2	1	1	0	0	0	40	167	65.2	82	96	0.85	0	0	0	2	1	0	0	23.37	119	76.5	142	5.68	221	5.3	5.4	50	29	45.2	13.67	1.75	72.04	5.29	4.35	139.7	5.56	1.43	3.67	1.27	0
1	55	3	1	1	0	0	0	0	160	61.3	86	97	0.89	0	0	0	0	1	0	0	23.94	126.5	75	154	6.39	182	5.3	7.2	37	25	47	13.7	2.68	94	3.75	3.72	137.6	5.48	1.55	2.41	1.93	0
1	55	2	1	1	0	0	0	35	169	90	90	100	0.9	0	0	0	2	1	0	1	31.51	121	71.5	140	6.81	233	5.6	6.5	21.34	18	47.5	9.1	2.6	108	9.26	4.94	139	4.04	0.76	2.73	1.15	0
1	55	2	0	1	0	0	0	50	170	89	96	104	0.92	0	0	0	1	1	0	0	30.79	132.5	84	156	5.71	264	5.66	5.8	33	22	48.4	7.3	1.1	77.1	7.22	4.19	142.2	5.74	2.7	3.86	1.21	0
0	55	2	1	1	0	0	0	60	163	75.8	94	105	0.9	0	0	0	1	1	0	0	28.52	128.5	75	127	7.03	205	6.2	8	27	24	49.3	14.7	2.1	58.2	3.32	3.74	141.7	3.56	1.24	2.12	1.27	0
0	55	2	1	1	0	0	0	0	159	63.2	78	96	0.81	0	0	0	0	0	0	0	24.99	127	79	138	4.74	322	5.4	7.2	36	29	46.6	18.7	3.05	66	4.59	5.25	138.2	7.22	3.21	4	1.52	0
1	55	3	1	1	0	0	0	30	168	90	95	109.5	0.865	0	0	0	2	1	0	2	31.88	132.75	79.25	159	8.53	187	6.5	5.8	88	54	46	30.5	6.61	59	7.84	4.84	144.1	5.16	1.81	3.46	1.08	0
0	55	3	1	1	0	0	0	30	160	74.7	82	98	0.83	0	0	0	1	1	0	0	29.17	130	79	133	4.58	317	5.8	5.8	12	19	46.7	19.7	2.35	61	5.77	4.25	140.3	5.03	0.79	3.62	1.43	0
1	55	3	1	1	0	0	0	30	172	70.5	80	96	0.83	0	0	0	2	1	0	0	23.83	122.5	74.5	139	6.74	186	5.9	5.7	32	24	44.46	9.58	2.5	66	6.49	4.22	138.3	4.95	1.08	3.36	1.22	0
1	55	3	1	1	0	0	0	40	180	90.35	94	107	0.875	0	0	0	2	1	0	0	27.88	124.25	74.75	150	6.77	198	5.3	6.4	27	18	47.6	21.15	4.55	104	5.52	4.29	138.9	4.65	3.26	2.34	0.83	0
1	55	2	1	1	0	0	0	0	167	66.6	82	95	0.86	0	0	0	2	1	0	0	23.88	130.25	75	163	4.37	255	5.8	6.4	29	22	46.2	23.8	6.14	67	4.63	4.16	139.3	4.45	0.75	2.95	1.14	0
1	55	3	0	1	0	0	0	30	168	70.7	85	96	0.88	0	0	0	2	1	0	0	25.04	124.5	75	131	6.72	234	5.4	6.1	15	20	49.9	8.2	3.07	103	6.53	4.56	142.2	4.15	2.24	2.29	0.92	0
0	55	2	1	1	0	0	0	50	160	59.3	79	86	0.92	0	0	0	2	1	0	0	23.16	123	75	138	6.58	264	5.7	6.4	12	24	45.9	22.42	3.87	46	4.95	3.47	139.7	4.56	1.9	2.05	1.33	0
0	55	2	1	1	1	0	0	30	150	66.1	86	102	0.84	0	0	0	1	1	0	0	29.37	125.5	79	142	4.97	337	6.6	6.5	16	18	45.6	11.44	1.6	77.8	4.54	4.42	140	4.6	1.73	2.44	1.2	0
1	55	2	1	1	0	0	0	30	172	73.1	87	88	0.98	0	0	0	1	1	0	0	24.7	124.5	76	127	7.89	189	5.1	6.1	12	15	44.7	9.67	2.33	74.4	6.48	4.37	130.3	4.38	1.9	2.84	0.94	0
1	55	2	1	1	0	0	0	35	174	80	97	105	0.92	0	0	0	2	1	0	0	26.42	121	72	173	6.8	168	6	7.2	31.56	21	46	23.73	14.13	89.6	5.46	4.74	135.5	3.68	1.2	1.94	1.27	0
0	55	2	1	1	0	0	0	30	171	65.75	78	87	0.895	0	0	0	1	1	0	0	22.485	122.75	76.5	138	4.72	146	5.7	6.1	12	19	45.2	8.17	1.1	64.9	5.29	4.35	141	4.13	1.42	2.24	1.29	0
0	55	3	1	1	0	0	0	20	159	56.5	77	93	0.83	0	0	0	1	1	0	0	22.33	132.25	77.75	134	6.09	308	6.2	8	24	20	48	7.1	1.24	67.6	6.11	4.36	138.2	7.86	2.58	4.95	1.81	0
0	55	2	1	1	0	0	0	0	163	85	86	96	0.89	0	0	0	0	1	0	0	31.99	126	75	141	4.03	308	5.7	6.4	25	22	48.2	14.82	3.12	51	5.31	3.8	140.2	5.53	2.18	3.34	1.23	0
0	55	2	1	1	0	0	0	30	165	66.6	82	94	0.87	0	0	0	1	1	0	0	24.455	129.75	76.5	136	7.02	218	6	6.5	40	20.6	51	16.47	2.2	52	4.64	4.35	140	4.34	1.44	1.98	1.68	0
1	55	3	1	1	1	0	0	30	176	82.9	95	110	0.86	0	0	0	0	1	0	0	26.755	125.25	77.75	146	7.74	310	5.3	5.8	14	14	45.2	11.07	2.24	86	7.55	3.47	141.3	3.83	0.97	2.3	1.08	0
0	55	2	1	1	0	0	0	40	160	55.65	70.1	90	0.775	0	0	0	1	1	0	0	21.735	123.5	74	97	7.78	288	5.5	5.6	19	21	46.9	6.6	1.4	82.4	4.14	4.51	136.3	8.41	6.6	4.07	1.3	0
0	55	2	1	1	0	0	0	30	164	59.2	76	80	0.95	0	0	0	2	1	0	0	38.66	122.5	77.5	137	6.11	197	5.8	6.8	21	16	44.7	12.5	0.9	61.26	4.3	4.45	142.4	5.82	2.23	3.67	0.84	0
1	55	3	1	1	1	0	0	0	175	88	92	106	0.86	0	0	0	0	0	0	0	28.73	130	88	147	5.69	219	5.1	6.1	16	20	44.8	11.4	1.9	100	5.14	3.73	139.7	3.88	2.07	2.04	0.88	0
0	55	3	1	1	0	0	0	30	161	62	83	92	0.9	0	0	0	2	1	0	0	23.91	119.5	77	146	6.44	280	5.8	6.1	18	20	43.1	14.5	1.76	50.9	6.56	4.5	138.7	5.5	1.93	3.4	1.54	0
0	55	2	1	0	0	0	0	0	150	51	83	89	0.93	0	0	0	0	1	0	0	22.66	127.5	79	136	3.81	218	5.8	5.9	40	34	45	13.42	1.2	71	6.15	3.95	133.1	6.01	0.77	2.34	2.33	0
0	55	3	1	1	0	0	0	0	160	63.8	80	90	0.88	0	0	0	0	1	0	0	24.92	124.5	77.5	140	5.25	180	5.2	6	18	24	46.2	13.5	2.71	68.5	3.93	4.33	141	4.3	1.67	3.19	0.92	0
0	55	2	1	1	0	0	0	30	168	70	82	98	0.83	0	0	0	2	1	0	0	24.8	123	75.5	112	5.9	271	5.8	6.7	16	15	46.6	6.1	0.44	66.3	4.96	4.42	139.8	4.76	2.07	3.34	0.84	0
0	55	2	1	1	0	0	0	0	162	70.7	80	90	0.88	0	0	0	0	1	0	0	26.93	117.5	74.5	131	6.37	200	5.3	6	13	23	45.1	11.91	2.71	62.6	5.62	4.04	136.9	3.8	1.07	2.03	1.15	0
0	55	3	0	1	0	0	0	30	163	65	83	95	0.87	0	0	0	2	1	0	0	24.46	122	75	134	4.98	292	5.6	6.3	42	32	47.5	6.2	1.3	56	3.61	4.44	140.4	4.19	2.08	2.47	1.44	0
1	55	2	1	1	0	0	0	20	170	78.15	96	108	0.885	0	0	0	2	1	2	1	27.035	124.25	74.75	149	6.29	141	5.6	5.9	28	23	45.2	11.74	1.71	79	6.17	3.8	141.7	3.83	2.44	1.63	1	0
0	55	2	1	1	0	0	0	60	155	57.05	70	85	0.82	0	0	0	2	1	0	0	23.74	125.5	77	136	7.88	255	5.2	5.4	17	22	46.5	12.79	1.43	64.9	3.71	4.29	137.7	5.58	1.63	3.25	1.48	0
1	55	3	1	1	0	0	0	30	174	80.8	89	92	0.96	0	0	0	1	1	0	0	26.685	123.25	75.75	155	5.24	226	5.3	6	25	20	47.2	12.08	1.37	90.7	5.4	4.54	136.9	4.25	2.19	2.54	1.41	0
1	55	3	1	1	0	0	0	50	176	67.7	74	80	0.92	0	0	0	1	1	0	0	21.85	130.5	71.5	159	3.91	339	6.3	5.8	17	19	46	14.29	1.96	77	8.66	4.62	139.6	4.36	1.07	2.45	1.71	0
0	55	2	0	1	0	0	0	0	163	82.4	92	102	0.9	0	0	0	0	1	0	0	31.01	126	75	158	6.37	329	5.6	4.5	67	36	49.1	9.51	1.4	50.9	3.98	4.39	141.4	5.46	2.02	4.05	0.81	0
0	55	3	1	1	0	0	0	20	158	50.85	75	86	0.87	0	0	0	1	1	0	0	20.36	124.5	75.5	131	6.36	187	5.8	6	16.61	20	44.5	7.28	1.33	51	4.85	3.96	140	4.74	1.12	2.83	1.72	0
1	55	3	0	1	0	0	0	30	189	80	82	90	0.91	0	0	0	1	1	5	1	22.39	120.5	69.5	161	4.43	261	5.6	5.7	22	18	51.3	10.41	0.44	74	5.19	4.21	138.3	5.35	1.81	3.51	1.13	0
0	55	3	1	1	0	0	0	30	165	61.25	80	91.5	0.87	0	0	0	1	0	0	0	22.55	123.25	75.75	137	5.76	256	6.4	5.8	19	17	49.1	13.2	2.23	85	7.34	4.35	138.4	5.75	1.22	4.05	1.49	0
0	55	3	1	1	0	0	0	0	160	70	88	96	0.91	0	0	0	0	1	0	0	27.34	125.5	77.5	134	8.5	216	5.7	6.1	16	16	48	6.3	2.39	63.13	5.05	3.69	140	4.24	1.81	2.12	1.12	0
1	55	2	1	1	0	0	0	0	170	71.9	88	96	0.92	0	0	0	2	1	0	1	24.88	124	75.75	133	3.28	137	5.62	6.2	52	35	45.4	24.7	14.13	81.9	4.36	4.69	141.6	5.73	1.6	3.43	2.09	0
1	55	3	1	1	1	1	0	30	176	67.4	82	90	0.91	0	0	0	2	0	20	0	21.75	125	72	159	5.76	274	5.7	5.7	15	18	51.3	12.7	1.64	72.1	5.23	4.81	137.7	4.98	1.24	3.55	1.14	0
0	55	3	1	1	0	0	0	60	156	55.7	78	92	0.85	0	0	0	1	1	0	0	22.885	139.25	75.75	120	5.31	182	5.4	5.6	13	18	46.2	12.53	2.01	48	5.09	4.25	137.5	5.12	1.23	2.98	1.43	0
1	55	3	1	1	0	0	0	30	175	94.8	100	106	0.94	0	0	0	0	0	0	0	33.625	128.25	76.25	149	8.85	287	6.4	6.4	93	53	44.7	8.95	3.34	68.5	5.06	4.35	139.4	2.91	3	0.89	0.89	0
1	55	3	1	1	0	0	0	30	167	64.2	88	102	0.86	0	0	0	2	1	0	0	23.015	123	74.25	163	8.33	218	5.6	6.3	39	31	45.33	15.02	3.7	104	6.76	4.19	139.5	5.74	2.36	3.92	1.13	0
0	55	3	1	1	0	0	0	20	158	51.5	83	93	0.89	0	0	0	1	1	0	0	20.62	127.25	76.75	124	4.9	280	5.6	6.2	8	18	46.9	10.1	0.4	50	5.56	4.19	139	5.68	0.96	3.77	1.27	0
1	55	3	0	1	0	0	0	30	174	87	86	94	0.91	0	0	0	1	1	4	1	28.73	122.5	74.5	160	6.64	146	5.6	6.4	16	19	49.1	18.6	2.9	89.6	5.72	4.4	142.2	5.59	0.72	3.6	1.51	0
0	55	2	0	1	0	0	0	30	158	76.7	92	103	0.89	0	0	0	1	1	0	0	30.72	122.25	71.5	130	4.92	192	5.3	5.7	19	21	40.03	9.41	1.63	66.9	6.29	4.33	140.6	6.85	0.66	5.36	1.18	0
1	55	3	1	1	1	0	0	0	168	75.8	87	102	0.85	0	0	0	2	0	0	1	26.85	123.5	74.5	140	5.03	161	5.7	6.3	54	37	44.5	13.8	1.66	79.6	6.47	4.05	138.5	4.92	1.14	3.58	1.09	0
1	55	2	1	1	1	0	0	30	172	85.9	90	102	0.88	0	0	0	1	1	0	0	29.03	128	77.5	159	5.94	309	5.3	5.3	20	17	44.8	16.4	3.18	49	4.32	4.21	137.7	4.54	0.81	3.47	1.25	0
0	55	2	1	1	0	0	0	50	172	84.1	86	100	0.86	0	0	0	1	1	0	0	28.42	124	77.5	135	4.82	209	5.5	5.3	14	20	49.2	8.9	1.8	60.3	5	3.73	139	6.84	2.78	3.76	1.54	0
1	55	2	1	1	1	0	0	0	173	85.3	94	103	0.91	0	0	0	2	0	0	0	28.5	121	79	143	3.88	116	5.3	6.5	17	18	42.5	19.37	4.1	96	3.92	3.94	141	5.57	0.97	4.21	1.06	0
1	55	2	0	1	0	0	0	0	173	86.1	89	96	0.92	0	0	0	0	1	0	0	28.76	123.5	74.5	145	6.55	185	6.1	6.2	58	45	49.7	18.6	4.55	65	4.03	3.73	136	4.01	1.24	2.58	1.03	0
1	55	2	1	1	0	0	0	60	174	79.4	78	83	0.935	0	0	0	1	1	0	0	26.22	122.25	74.5	154	5.99	246	5.2	6.1	25	18	47.7	9.02	1.5	50	6.04	3.72	141.3	3.75	1.49	2.09	0.79	0
0	55	3	1	1	0	0	0	30	163	60.1	80	88	0.905	0	0	0	1	1	0	0	22.615	124.25	74.75	135	7.41	329	5.3	5.5	19	19	46.3	14.86	2.08	68.8	4.91	3.99	138.8	5.12	1.66	2.87	1.74	0
1	55	2	1	1	0	0	0	50	180	84.8	88	92	0.955	0	0	0	1	1	0	0	26.165	125	76.5	116	6.63	148	5.3	5.5	17	18	41.1	9.2	1.73	76	6.66	4.06	140.4	2.52	0.6	1.02	0.95	0
1	55	3	0	1	0	0	0	30	177	95	90	98	0.91	0	0	0	2	1	3	1	30.32	125.5	75	151	5.55	195	5.7	7.5	39	28	45.9	19	3.6	84.5	6.68	4.47	140.4	4.8	2	3.14	0.78	0
1	55	3	1	1	1	1	0	30	170	89.75	104	113	0.92	0	0	0	1	0	0	0	44.63	136	85	142	6.8	254	6.5	6.9	19	17	47.9	15.99	1.26	125.2	4.33	4.98	138.9	4.83	2.55	3.09	0.79	0
1	55	3	1	1	0	0	0	30	170	80	92	102	0.9	0	0	0	1	1	0	0	27.68	125	76.5	155	6.41	155	5.3	6	37	26	44.8	11.1	2.3	73	7.13	2.81	141.4	3.67	1.24	2.12	1.08	0
1	55	3	0	1	0	0	0	50	168	74	85	90	0.94	0	0	0	1	1	0	0	26.215	127.5	78.5	163	9.64	269	5.4	6	14	15	51.3	5.92	1.9	77	6.35	4.15	139.3	4.92	3.24	2.64	1.04	0
0	55	2	1	1	0	0	0	20	156	55.15	80	90	0.88	0	0	0	2	1	0	0	22.66	125.75	73.25	132	4.54	294	5.6	6.4	23	23	48.07	6.53	1.22	66.3	4.61	4.05	137.1	7.94	5.73	4.03	1.06	0
1	55	2	1	1	0	0	0	30	175	87.25	96	99	0.97	0	0	0	1	1	0	0	28.485	129	72.75	164	5.44	184	5.1	5.8	16	19	49	11.2	1.3	74	3.91	3.73	143	4.47	1.22	3.44	1.24	0
1	55	2	1	1	0	0	0	30	169	67.4	80	89	0.89	0	0	0	2	1	0	0	23.59	122.5	77.5	155	4.48	163	5.3	5.5	32	22	42.5	16.52	2.5	67.3	4.97	4.71	139.4	5.97	1.42	3.85	1.59	0
1	55	2	1	1	0	0	0	30	168	60	76	80	0.95	0	0	0	0	0	3.5	1	21.255	127.5	74.75	172	4.82	321	5.5	7.3	32	17	47.9	11.8	2	92.5	5.99	4.16	141.6	5.13	0.92	3.53	1.38	0
1	55	2	1	1	0	0	0	30	177	75.5	86	98	0.88	0	0	0	1	1	0	0	24.09	122.5	72.5	119	6.6	205	5.3	5.9	21	24	43.6	6	1.4	60	4.57	3.86	139.3	4.68	1.63	2.57	3.52	0
1	55	3	1	1	0	0	0	30	176	68.95	80	92	0.87	0	0	0	1	1	0	0	22.255	126.5	75.5	128	8.86	247	5.7	6	11	10	48.36	5.4	1.49	152	7.53	4.65	133.4	5.1	2.96	2.08	0.84	0
0	55	2	0	1	0	0	0	30	145	55	72	78	0.92	0	0	0	2	1	0	0	26.16	104.5	66.5	127	6.25	237	6.5	6.7	12.81	17	45.2	9.84	1.89	56.4	4.73	4.38	139.1	5.82	1.05	4.69	1.38	0
0	55	3	1	1	0	0	0	20	169	53.45	72	83	0.865	0	0	0	2	1	0	0	18.73	124	75.5	145	5.05	177	5.6	5.8	45	27	45.2	9.35	1.1	80	6.06	4.25	140	5.11	2.18	2.54	1.41	0
1	55	3	0	1	0	0	0	30	178	94.5	100	115	0.87	0	0	0	1	1	0	0	34.71	122	72.5	143	5.42	344	5.3	5.8	16	18	51.3	6.3	0.44	73	7.3	4.55	133.4	4.24	2.07	2.84	0.98	0
0	55	2	1	1	0	0	0	30	160	55.85	73	88	0.825	0	0	0	1	1	0	0	21.815	123	75.5	121	10.65	332	5.3	6.8	28	21	43.6	7.44	0.97	43	5.23	4.54	142.7	4.21	1.15	2.98	1.44	0
1	55	3	1	1	0	0	0	30	178	84	86	98	0.87	0	0	0	2	1	0	0	26.51	120.5	79	165	11.7	214	5.7	5.5	20	16	45.3	16.16	2.96	79	4	3.94	141.3	3.39	0.78	1.91	1.34	0
1	55	2	1	1	0	0	0	30	170	83	82	98	0.83	0	0	0	2	1	5	1	28.71	122.5	76.5	161	4.71	279	5.1	6.4	18	14	49	8.4	1.75	86	6.6	4.23	141.2	4.23	1.67	3.06	0.92	0
0	55	2	1	1	0	0	0	40	160	62.1	85	96	0.88	0	0	0	2	1	0	0	24.25	125	73.5	141	6.15	156	6.1	5.8	18	22	46	10	0.44	65.37	3.81	4.81	142.3	5.8	0.8	4.22	1.41	0
1	55	2	1	0	0	0	0	30	170	85.85	98	110	0.89	0	0	0	2	0	0	1	29.7	120.75	75.25	149	4.56	258	5.7	7.7	67	60	49	26.79	4.69	65.5	4.25	4.15	139	4.7	1.88	2.58	1.48	0
1	55	2	1	1	0	0	0	30	177	78.5	85	96	0.88	0	0	0	1	1	5	1	25.05	123.5	73.5	151	5.82	227	6.4	6.1	25	24	48.4	12.7	1.9	77.1	5.66	4.61	120	5.76	0.79	3.75	1.57	0
0	55	2	1	1	0	0	0	30	160	65.3	76	88	0.86	0	0	0	2	1	0	0	25.5	123	75	142	6.11	209	5.9	6	28	30	49.7	14.07	3.04	51.48	3.92	3.96	140.3	3.89	1.97	1.71	1.16	0
1	55	3	1	1	1	0	1	60	175	76.05	87	99	0.87	0	0	0	1	0	0	0	24.825	128.25	76.5	148	3.12	184	6	5.8	12	16	44.8	13.4	2.08	99	5.05	4	140.5	3.92	0.77	1.78	1.29	0
1	55	2	1	1	0	0	0	40	170	69	87	96	0.905	0	0	0	1	1	0	0	23.87	127.25	76.75	150	5.39	240	6.4	5.9	18	20	49	14.8	1.8	112	4.43	4.16	141.4	5.42	1.67	3.55	1.11	0
1	55	3	1	1	0	0	0	60	172	79.75	90	101.5	0.885	0	0	0	1	0	6	1	26.95	127.5	78.25	157	4.64	175	5.8	6.1	52	37	46	14.3	2.35	54.62	3.83	4.21	136.5	4.12	0.89	2.49	0.94	0
0	55	2	0	1	0	0	0	30	156	71.75	87	93	0.935	0	0	0	1	0	1	0	29.475	124.25	75	125	8.67	303	5.6	6.9	20	20	42.8	9.37	2.1	51.2	4.35	4.27	142.2	4.36	0.77	2.97	1.23	0
0	55	3	1	1	0	0	0	30	167	74.3	83	106	0.78	0	0	0	2	1	0	0	26.64	121.5	74.5	142	3.31	243	5.6	6.1	32	27	45.2	8.4	1.8	64.7	4.08	4.4	140.4	5.5	1.49	3.24	1.41	0
0	55	3	1	1	0	0	0	30	168	61	80	88	0.9	0	0	0	2	0	0	0	21.61	134.5	76	135	5.72	295	6	6.2	43	30	51.4	18.68	0.5	45.8	4.3	3.92	139.3	7.38	3.27	3.79	1.81	0
1	55	3	1	1	0	0	0	60	182	86.25	94	102	0.92	0	0	0	2	1	2	2	26.035	125.75	72.5	141	6.23	192	5.4	5.4	23	20.3	47.2	11.3	1.72	67	4.14	4	139.5	4.35	0.81	2.79	1.36	0
1	55	2	1	1	0	0	0	30	170	78.1	84	95	0.88	0	0	0	1	0	0	0	27.02	124	73.75	151	6.8	211	5.8	6.7	19	22	45.2	14.6	2.5	64.8	5.91	4.49	138	5.65	0.53	4.52	1.16	0
1	55	2	1	1	0	0	0	50	185	77.7	85	90	0.94	0	0	0	1	1	0	0	22.7	126.75	76.25	157	4.29	198	5.3	5.4	9	15	44.7	11.12	1.1	92.9	5.42	4.14	141.5	6.94	2.86	4.02	1.19	0
0	55	2	1	1	1	0	0	30	154	57	80	96	0.83	0	0	0	1	1	0	0	24.03	129	73.5	140	6.75	198	6.47	6	12	14	45.33	8.7	0.44	50	4.52	3.82	138.5	5.56	0.77	3.99	1.32	0
1	55	2	1	1	0	0	0	60	173	66.4	82	95	0.86	0	0	0	2	1	0	0	22.18	124	74.5	149	4.97	222	5.7	5.5	39	24	46.5	7.65	1.1	88	4.61	4.32	140	4.86	1.54	3.31	0.99	0
1	55	2	1	1	0	0	0	30	170	64.6	78	86	0.9	0	0	0	2	1	20	2	22.35	124.5	71	157	7.73	167	5.7	5.9	23	19	43.3	8.5	1.73	52.7	7.84	4.11	140	4.35	1.18	2.89	0.96	0
1	55	3	1	1	0	0	0	30	176	88.4	98	106	0.92	0	0	0	1	0	5	1	28.535	129	77.25	169	9.26	268	6.1	6.3	18	18	49.8	10.2	2.13	68	5.66	3.96	139.9	4.73	2.68	2.47	1.04	0
1	55	3	1	1	0	0	0	30	170	70	85	95	0.89	0	0	0	1	1	0	0	24.22	126.5	76.5	154	3.73	187	5.4	6.1	29	29	46.2	13.8	1.66	72.1	4.84	3.82	141.9	3.16	0.78	1.42	1.35	0
0	55	2	1	1	0	0	0	30	159.9	57.15	75	90	0.83	0	0	0	1	1	0	0	22.345	124.25	74.25	121	6.11	250	5.7	5.8	22	12	43.6	6.8	1.7	59	5.7	4.76	141.3	5.17	0.93	3.81	1.33	0
1	55	3	1	1	0	0	0	30	167	55.8	78	88	0.885	0	0	0	1	1	0	0	20.005	126	73.75	97	4.55	164	5.6	7.2	34	37	45.8	17.31	4.71	96	3.76	4.79	142.2	2.84	1.74	1.19	1.25	0
0	55	3	1	1	0	0	0	20	157	60.25	79	89	0.885	0	0	0	1	1	0	0	24.44	124.75	73.5	137	8.58	261	5.5	6.9	100	58	49.2	14	2.9	81.1	6.31	4.01	142.4	5.6	3.84	2.37	1.22	0
1	55	2	1	1	0	0	0	30	169.8	66.3	80	98	0.81	0	0	0	1	0	0	0	22.99	125.5	73.5	162	2.51	134	5.3	5.7	19	20	48.2	12.7	2.1	64.7	3.39	4.26	138.4	5.18	0.79	4.03	1.25	0
0	55	3	1	1	0	0	0	60	167	74	90	95	0.94	0	0	0	2	1	0	0	26.53	123.5	72.5	165	6.91	282	5.6	5.7	17	19	47.9	24.9	3.1	49	5.49	3.94	140	6.04	0.58	4.76	0.96	0
1	55	3	1	1	0	0	0	30	180	73.4	86	95	0.905	0	0	0	1	1	0	0	22.645	123.5	74.75	147	5.67	233	6	5.4	12.18	15	46.6	11.2	1.36	97.1	5.82	4.58	133	3.93	1.27	2.25	1.13	0
0	55	2	1	1	0	0	0	60	158	55.05	83	91	0.91	0	0	0	2	1	0	0	22.05	131.75	81.25	140	7.34	281	5.5	6.5	19	18	48.36	7.88	1.3	53.2	4.99	4.29	142.9	8.23	1.83	6.65	1.28	0
0	55	3	0	1	0	0	0	60	158	50	78	92	0.85	0	0	0	2	1	0	0	20.02	124	75	134	5.71	229	6.3	5.9	19	15	46.2	8.2	1.4	55.7	3.32	3.67	138.2	7.27	2.91	4.84	1.45	0
0	55	3	1	1	0	0	0	30	152	63.7	87	97	0.89	0	0	0	2	1	0	0	27.57	124	72.5	132	6.53	261	5.6	6.3	9	15	45.2	6.59	1.28	54	4.44	4.32	138.9	4.83	1.19	3.02	1.48	0
0	55	3	1	1	0	0	0	40	153	47.2	78.5	92	0.855	0	0	0	1	1	0	0	20.155	129.25	80.75	148	5.18	255	6.7	6.3	33	31	51	11.84	1.8	55.3	5.23	4.34	135.5	5.06	2.52	3.26	1.01	0
0	55	2	0	1	0	0	0	60	168	71.1	83	90	0.92	0	0	0	2	1	0	0	25.19	128.25	77	128	5.23	303	6.3	7.2	26	26	45.2	6.3	1.2	63.48	4.76	4.76	139.7	4.87	1.5	3.03	1.24	0
1	55	2	1	1	0	0	0	30	170	82.4	90	100	0.84	0	0	0	1	0	0	0	28.51	127.5	75	153	4.51	130	5.3	6.7	15	21	45.6	10.38	2.5	83	5.31	3.47	139.1	3.68	1.19	1.93	0.93	0
0	55	2	1	1	0	0	0	0	160	65.7	80	90	0.88	0	0	0	0	1	0	0	25.66	124.5	75	142	6.05	232	5.8	6.5	33	24	43.9	9.05	3.08	60	4.49	4.35	140.4	3.83	1.55	2.12	1.23	0
0	55	3	1	1	0	0	0	30	167	60.1	77	90	0.855	0	0	0	1	0	0	0	21.545	126	70.25	140	3.79	161	5.5	5.5	18	21	51.3	7.07	1.1	57	4.01	4.38	130.3	5.95	0.83	3.87	1.86	0
1	55	2	0	1	0	0	0	30	176.5	85.8	88	98	0.89	0	0	0	1	1	0	0	27.54	121	72	162	5.07	188	5.8	6.7	17	18	47.6	12.6	2.5	80	4.71	4.5	138.6	5.26	1.42	3.51	0.93	0
1	55	3	0	1	0	0	0	30	170	66.7	82	95	0.86	0	0	0	1	1	5	1	23.07	125	73.5	158	8.45	166	6.3	6.3	15	22	49.8	17.7	4.7	87	4.69	4.22	137.5	4.18	2.71	1.97	1.42	0
0	55	3	1	1	0	0	0	40	160	65.8	76	87	0.87	0	0	0	1	1	0	0	25.7	136.5	81.5	138	6.39	242	5.6	6.5	24	24	45.9	13.21	2.7	56.2	4.48	2.81	140.8	3.65	1.28	1.73	1.48	0
1	55	2	0	1	1	0	0	30	180	79.75	86.5	98	0.885	0	0	0	1	1	16.5	1	24.61	133	82.25	152	7.51	220	6.3	5.8	10	13	46.9	13.44	2.47	53.2	6.56	4.71	140	4.23	1.04	3.34	0.78	0
1	55	3	1	1	0	0	0	60	175.5	86.85	98.5	110	0.895	0	0	0	1	1	6	0	28.185	129.25	79.75	150	8.15	212	5.8	5.6	18	17	45.9	6.9	1.76	101	7.46	4.15	138.2	2.72	0.82	1.21	1.06	0
0	55	2	0	1	0	0	0	20	168	69.8	82	92	0.89	0	0	0	2	1	0	0	24.73	116.5	73.5	165	5.93	170	5.3	5.9	143	98	51.3	27.34	4.3	51	3.61	3.96	142.4	4.41	3.01	2.04	1.14	0
1	55	3	1	1	0	0	0	30	171	71.8	87	98	0.89	0	0	0	1	1	0	1	24.55	125.25	75.5	151	4.12	231	5.2	5.4	19	20	43.1	12.8	1.4	56	6.14	3.9	141.2	5	0.62	3.75	1.14	0
0	55	2	1	1	0	0	0	30	162	81.2	100	115	0.86	0	0	0	2	1	0	0	30.94	125	76	152	7.88	242	5.7	6.4	26.17	17	46.3	14.18	3.67	56.5	5.56	4.31	139.7	2.93	1.54	1.8	1.16	0
0	55	2	1	1	1	0	0	30	152.8	71.6	91	105	0.87	0	0	0	1	1	0	2	30.66	123.5	72	136	8.16	273	6	7	20	33	46.1	8.35	1.5	69	3.29	4.05	142.4	5.38	1.99	2.41	1.75	0
0	55	3	1	1	0	0	0	30	168	75	84	92	0.91	0	0	0	1	1	0	0	26.57	123.5	75.5	134	4.36	369	5.1	6.1	24	18	42.5	5.48	1.1	81	6.98	4.55	142.4	6.16	3.03	3.72	1.09	0
0	55	3	1	1	0	0	0	30	165	70	85	96	0.88	0	0	0	2	1	0	0	25.71	120.5	71	119	6.25	259	5.2	6.1	16.31	19	36.6	7.2	0.91	69.1	4.65	3.65	142.4	5.2	1.09	3.58	1.35	0
1	55	3	1	1	1	0	0	40	172	75.8	89	103	0.86	0	0	0	1	1	3	1	25.62	124.25	72.5	152	5.64	312	5.4	6.3	20	26	46.2	12.08	2.01	165.83	8.19	4.65	138.9	6.41	1.52	5.07	1.02	0
1	55	2	1	1	0	0	0	40	172	70	79.5	87	0.91	0	0	0	2	1	0	0	23.66	130	72.5	147	7.69	246	6	6.5	28	21	45.2	15.1	3.81	80	5.85	4.69	133	3.26	1.44	1.16	1.14	0
1	55	2	0	1	0	0	0	30	171	68.7	82	92	0.89	0	0	0	1	1	2.5	0	23.49	125.75	74.5	149	6.11	235	5.6	6.7	24	22	46.6	11.3	2	82.9	8.2	4.35	140.7	7.5	1.56	5.66	1.07	0
0	55	2	1	1	0	0	0	50	160	54	71	86	0.835	0	0	0	1	1	0	0	21.09	125.25	76.75	141	4.78	187	5.3	5.9	18	16	46.6	7.9	0.44	66.9	6.32	3.9	137.1	6.03	1.9	3.6	1.59	0
1	55	3	1	1	0	0	0	30	180	65.5	85	96	0.88	0	0	0	2	1	0	0	20.21	127.5	75.5	146	7.53	202	5.3	5.4	15	21	49.1	5.5	1.1	81.1	9.73	4.03	138.3	5.37	1.19	3.65	1.4	0
0	56	3	0	1	0	0	0	30	165	62.8	84	95	0.88	0	0	0	1	1	0	0	23.06	123.5	75	139	5.17	207	6	6.2	18.57	27	44.8	5.8	1.28	50.6	6.22	4.22	141.8	5.01	1.08	2.64	1.64	0
0	56	2	1	1	0	0	0	30	173	58.6	81	91	0.89	0	0	0	2	1	0	0	19.57	129.5	73.5	126	8.66	151	6.5	6	21	16	47	10.2	1.6	56	5.68	4.38	139	5.02	1.08	2.68	1.66	0
0	56	3	0	1	0	0	0	30	162	57.6	77	86	0.9	0	0	0	1	1	0	0	21.94	125.5	73.5	136	6.6	269	5.7	6	10	18	47	10.1	1.84	60	4.07	3.82	138.9	3.52	1.76	1.42	1.18	0
1	56	2	1	0	0	0	0	0	172	80	85	96	0.88	0	0	0	0	1	0	0	27.04	120.5	70.5	161	5.17	234	5.3	6.2	34	20	44.5	16.16	4.26	86	5.98	4.05	136.7	2.76	1.77	0.81	1.35	0
1	56	2	1	1	1	0	0	30	184	75	93	110	0.9	0	0	0	2	0	0	1	22.15	120.5	80.5	151	6.2	211	5.6	6.1	18	17	48.2	6.18	1.4	67.2	1.98	4.34	137.41	4.09	1.15	1.98	1.34	0
1	56	2	1	1	0	0	0	0	170	73.8	90	104	0.86	0	0	0	1	1	0	0	25.53	126.5	76.5	152	4.73	240	5.3	6.3	15	18	43.1	15.32	8.1	101.6	6.22	4.74	140.6	5.71	1.5	4.06	1.44	0
1	56	2	1	0	0	0	0	40	175	67.3	88	95	0.925	0	0	0	1	1	0	0	21.97	123.5	73	147	5.52	193	6	7.1	59	36	49	16.5	3.3	85	4.01	4.06	138.5	3.6	1.43	1.91	1.2	0
1	56	3	1	1	0	0	0	30	178	79.8	85	98	0.86	0	0	0	2	1	6	0	25.18	126.5	75.5	160	4.08	142	6	7.2	57	41	46.7	31.1	4.4	59	21	4.61	141.6	3.88	1.61	2	1.57	0
0	56	2	1	1	0	0	0	60	164	88.1	90	108	0.83	0	0	0	2	1	0	0	32.755	127	75.5	134	6.26	218	6.1	6.1	36	43	51	15.51	2	94.9	8.2	4.3	140.7	4.31	1.38	2.32	1.11	0
1	56	3	1	1	0	0	0	60	170	70	81	86	0.94	0	0	0	1	1	0	0	24.22	136.5	83	161	6.74	249	7.07	6.9	14	15	47.9	10.5	1.35	80.1	5.56	3.97	140.6	5.04	1.47	3.56	1.45	0
1	56	3	1	1	1	0	0	30	167	69.4	95	100	0.95	0	0	0	2	0	0	0	24.88	128.75	74.5	154	4.36	158	5.8	5.7	17	23	49.8	9.1	1.3	87	6.58	4.21	138.2	6.01	1.01	4.04	1.54	0
1	56	2	1	1	0	0	0	0	159	58.1	79	89	0.885	0	0	0	2	1	0	1	22.98	93.25	61.5	145	4.83	252	5.96	6.3	18	19	49.1	21.69	6.14	79	7.65	4.4	138.6	6.43	0.87	4.71	1.26	0
0	56	3	1	1	0	0	0	40	155	51.6	78	92	0.85	0	0	0	1	1	0	1	21.475	125.5	73	135	8.27	305	5	6.4	22	26	47.7	11.4	3.07	52	4.71	3.97	138.8	4.6	1.32	1.71	2.1	0
1	56	3	0	1	1	0	0	50	167	65.6	87	98	0.84	0	0	0	1	1	0	2	23.515	129	77.25	156	7.56	228	5.8	5.6	19	25.84	48.4	11.6	1.57	94.1	6.52	4.06	140	6.51	1.15	4.57	1.46	0
0	56	3	1	1	1	0	0	30	165	58.05	74.5	93	0.795	0	0	0	1	1	0	0	21.32	129.25	79	140	4.37	242	5.8	5.7	49	36	46.3	14.2	1.1	50.9	6.56	4.72	140.6	6.04	1.38	4.09	1.36	0
1	56	3	1	1	0	0	0	30	176	72.5	86	97	0.89	0	0	0	1	0	3	0	23.4	125	76.5	145	5.42	279	5.4	6.9	14	15	51.3	12.4	2.6	98.7	5.58	4.17	137.2	2.99	1.2	1.43	0.96	0
1	56	2	0	1	0	1	0	30	177	87	96	102.5	0.94	0	0	0	1	1	15	1	27.765	123.75	73.75	147	8.29	316	6	7	25	20	47.2	11.18	3.18	80.5	6.81	4.41	142.4	3.56	0.98	2.26	0.82	0
0	56	2	1	1	1	0	0	0	158	59.1	79	96	0.82	0	0	0	0	1	0	0	23.67	127.5	78.25	148	7.3	164	5.5	6.4	13	18	48	6.42	1.3	65.6	5.64	3.9	138.5	4.97	0.83	3.78	0.83	0
1	56	2	1	1	0	0	0	40	173	82.7	85	93	0.91	0	0	0	1	1	0	0	27.63	123.5	73.25	143	4.28	184	6.4	6.3	17	29	45.9	23.4	6.71	84.8	8.15	4.78	138.7	5.28	0.83	3.57	1.5	0
1	56	2	1	1	0	0	0	60	165	71.5	84	90	0.93	0	0	0	2	0	12.5	1	26.255	127	74	150	5.3	195	6.2	6	18.98	26	47	12.9	2.77	78.2	3.91	4.29	139.5	4.86	2.15	2.93	0.8	0
1	56	3	1	1	0	0	0	30	176	70	85	96	0.88	0	0	0	2	1	0	0	22.59	128	74.5	136	5.76	249	5.6	6.1	12	18	46.3	12.15	1.78	78	6.95	4.35	133.3	5.85	1.2	3.65	1.56	0
1	56	2	1	1	0	0	0	60	168	63.8	76	87	0.87	0	0	0	1	1	0	0	22.6	126.5	72.5	156	6.59	271	5.4	5.7	17	19	41.8	7.3	1.8	39	3.64	4.54	138.5	5.65	1.09	4.73	1.15	0
1	56	2	1	1	0	0	0	30	170	85	91	106	0.895	0	0	0	1	0	0	0	29.41	133.75	70.75	174	4.36	183	6.2	5.7	25	20	44.7	15.95	2.28	85.2	5.46	3.94	139.7	4.75	1.62	2.69	1.15	0
0	56	2	1	1	1	0	0	30	152	50.8	78.5	87	0.905	0	0	0	1	1	0	0	21.985	127.25	76.25	134	7.89	194	5.5	6.2	17	18	46.3	7.3	1.2	40	4.7	4.21	138.7	4.98	0.88	3.12	1.37	0
1	56	3	1	1	0	0	0	30	170	83	89	96	0.92	0	0	0	2	1	5	1	28.71	120.5	79	137	8.29	273	5.6	6.4	20.89	15	46.1	6	2.2	80	5.34	4.45	138.2	5.59	1.17	3.85	1.21	0
0	56	2	1	1	0	0	0	30	165	62.05	82	95	0.86	0	0	0	1	1	0	0	22.79	126.75	72	146	4.22	213	5.9	6.3	24	20	46.6	18.3	2.71	69.1	8.09	4.47	140.9	5.74	2.52	3.24	1.28	0
1	56	2	1	1	0	0	0	40	170	65.4	83	99	0.835	0	0	0	1	1	0	0	22.625	126.75	74	129	6.45	304	5.2	5.9	8	16	47.5	2.6	1.4	86	4.79	4.24	137.3	4.98	3.11	2.37	0.85	0
0	56	3	1	1	0	0	0	0	162	59	79	88	0.89	0	0	0	0	1	0	0	22.48	127.5	71	133	4.8	205	5.9	6.1	17	20	49.8	8.6	1.5	41.89	4.07	3.73	141.4	4.42	1.3	2.56	1.3	0
0	56	3	1	1	0	0	0	60	151	58.9	83	94	0.88	0	0	0	1	1	0	0	25.835	122	71.75	125	5.75	275	5.6	6.3	18.41	20	49.9	6.7	1.24	72	5.29	4.51	141.3	5.16	2	3.64	0.88	0
1	56	2	1	1	0	0	0	30	171	56.8	83	95	0.87	0	0	0	2	1	0	0	19.42	125	75.5	138	6.21	144	5.7	6	45	27	46.7	8.75	2.54	62.81	5.66	4.25	138.4	5	2.09	2.86	1.2	0
1	56	3	1	1	1	0	0	30	180	78.2	89	98	0.9	0	0	0	1	1	0	0	24.135	127.5	75.5	155	7.07	154	6.5	6.1	27.34	16.17	44.7	14.92	2.5	82.4	4.73	3.95	140.2	5.13	1.57	2.68	1.24	0
1	56	2	1	1	0	0	0	30	173	76.05	90	102	0.85	0	0	0	1	1	0	0	25.405	124	75.5	136	5.57	214	5.6	6.6	28	23	44.2	15.6	6.3	61	7.27	4.6	139.3	3.2	0.8	1.55	1.34	0
1	56	3	1	1	1	0	0	30	168	65	80	94	0.85	0	0	0	2	1	0	0	23.03	127.5	72.5	149	6.17	188	5.8	5.5	23	25	47.2	9.5	1.01	110.3	6.23	4.35	139.4	5.26	1.02	4.13	1.22	0
0	56	3	1	1	0	0	0	50	160	54.2	85	98	0.87	0	0	0	1	1	0	0	21.17	126.5	73.5	137	4.08	252	5.3	5.9	12	26	48.5	7.43	1.4	65	2.7	4.08	139.3	6.92	2.11	3.94	1.8	0
0	56	3	1	1	0	0	0	20	160	50.3	72	83	0.86	0	0	0	2	1	0	0	19.64	116.5	76.5	148	5.11	383	5.6	6.2	16	21	47.7	5.8	1.1	60	5.36	4.58	141.3	6.29	1.4	4.84	1.25	0
0	56	2	1	1	0	0	0	30	152	60	86	95	0.9	0	0	0	2	1	0	0	25.96	123.5	71.5	123	6.64	445	5.4	6.9	18	16	42.6	9.9	3.08	70.9	5.62	3.85	139	5.48	2.7	2.66	1.58	0
1	56	3	1	1	0	0	0	30	177	89	94	110	0.91	0	0	0	2	1	0	0	28.4	124.5	76.5	151	9.09	256	5.8	5.7	20.79	21	47.5	10.75	2.19	64.2	5.38	3.94	130.4	5.18	1.64	2.83	1.29	0
0	56	3	1	1	0	0	0	30	158	65.6	80	94	0.85	0	0	0	2	1	0	0	26.27	118.5	72.5	126	7.63	250	5.8	6	35	22	47.3	12.06	1.76	52	4.97	4.47	140	3.92	1.49	2.08	1.59	0
0	56	2	1	1	0	0	0	0	162	84	102	120	0.91	0	0	0	0	1	0	0	32	120.5	75.5	120	7.7	310	5.6	8.4	59	39.38	47.6	17.25	3.56	75	5.67	4.24	141	4.86	1.62	3.07	1.04	0
0	56	3	1	1	0	0	0	30	160	66.95	83	88	0.94	0	0	0	1	1	0	0	26.15	128.75	78.75	117	7.93	282	6.1	8	18	25	48	9.17	2.5	73	3.3	3.94	140	4.27	1.58	2.08	1.66	0
1	56	2	0	1	0	0	0	20	168	69.8	88	98	0.89	0	0	0	2	1	0	0	24.73	121	77.5	149	4.37	189	5.8	6	10	16	42.8	11.6	1.6	50	4.16	3.9	138	4.14	1.72	1.98	1.28	0
0	56	3	1	1	0	0	0	30	165	66.3	80	90	0.88	0	0	0	1	1	0	0	24.35	125	75.5	140	5.6	423	5.2	5.9	18	15	46	8.9	1.7	75	4.19	4.4	137.4	7.37	1.65	5.28	1.41	0
0	56	2	1	1	0	0	0	30	158	56.2	80	92	0.865	0	0	0	2	1	0	0	22.51	123.25	75.25	127	5.27	305	5.8	6.5	14	20	50.3	10.9	1.9	64.4	2.53	4	140	5.64	0.86	3.88	1.72	0
0	56	2	1	1	0	0	0	30	165	65.85	85	90	0.94	0	0	0	1	1	0	0	24.185	129	77.75	134	7.5	164	5.6	5.8	67	41	49.1	11.91	1.52	51.2	5	4.55	139.4	3.92	0.75	2.19	1.37	0
1	56	2	1	1	0	0	0	60	170	86.25	93	110	0.845	0	0	0	1	1	0	0	29.84	123.25	73.75	152	5.73	156	5.4	6.9	136	62	45.33	20.78	4.15	79.8	5.06	4.59	142.4	3.43	0.86	1.84	0.83	0
0	56	3	1	1	0	0	0	0	160	60	80	90	0.88	0	0	0	0	1	0	0	23.43	121.5	70.5	125	4.91	205	5.6	6.3	14	20	48	12.6	2.8	55.1	4.75	4.15	140.4	5.37	2.62	2.71	1.66	0
0	56	3	1	1	0	0	0	30	168	74.5	80	94	0.85	0	0	0	2	1	0	0	26.39	129.75	76.75	140	8	260	6.3	6.2	30	22	47	10.29	1.01	52	5.32	3.44	140	6.09	1.83	4.33	1.28	0
1	56	2	1	1	0	0	0	30	173	79.2	86	95	0.905	0	0	0	2	0	0	0	26.455	122.75	73.75	147	5.23	242	5.6	5.7	23	14	46.2	6.81	1.1	81.4	5.89	3.8	143	5.32	1.14	3.41	1.22	0
0	56	2	0	1	0	0	0	30	160	51.8	82	90	0.83	0	0	0	2	1	0	0	20.23	125.5	73.5	139	7.46	296	6	6.4	16	27	47.3	14	3.4	71	6.18	4.72	138.7	5.41	1.17	2.04	2.39	0
1	56	3	1	1	0	0	0	30	175	90	85	100	0.85	0	0	0	2	1	3	0	29.38	125	73.5	172	7.65	254	5.9	6	12	17	51.3	15.24	2.65	81.91	4.97	4.5	137.3	4.98	1.56	3.63	1.03	0
1	56	2	1	1	0	0	0	30	171	84	80	95	0.84	0	0	0	2	1	0	1	28.72	126	74.5	148	10.69	228	5.1	6.7	22	19.62	48.8	15.34	2.94	68.6	5.51	3.95	138.8	5.41	1.19	3.25	1.23	0
1	56	2	1	1	0	0	0	50	170	74.5	89	100	0.89	0	0	0	2	1	0	0	25.775	121.5	78.25	128	8.16	149	5.4	6.5	26	26	51.7	12.96	2.58	65	4.52	4.54	137.3	5.45	0.96	3.68	1.37	0
0	56	3	0	1	0	0	0	60	164	67.7	82	90	0.91	0	0	0	2	1	0	0	25.17	132	73.5	129	5.75	290	5.7	5.3	59	52	46.5	11.14	1.1	47	5.56	4.32	141	5.39	2.03	2.95	1.76	0
1	56	3	1	1	0	0	0	30	170	63.3	78	90	0.87	0	0	0	1	1	0	1	21.9	129	79	145	6.42	231	6.3	6.1	17	20	46.8	8.63	1.17	76	5.07	4.55	138.2	4.9	1.02	3.64	1.15	0
1	56	3	1	1	1	0	0	30	174	67.4	88	102	0.86	0	0	0	0	1	0	0	22.255	126	75.5	160	4.41	210	5.9	6.1	17.91	16	49.8	10.6	1.4	56.9	5.24	3.73	135	6.48	2.23	4.02	1.48	0
1	56	2	1	1	0	0	0	0	160	66.8	90	102	0.88	0	0	0	0	1	10	0	26.09	127	78.5	152	6.27	184	6.3	6.1	31	19.36	46.6	10.05	1.6	52	21	4.8	141.6	4.23	1.54	2.48	1.28	0
0	56	2	0	1	0	0	0	0	158	62.1	78	90	0.86	0	0	0	0	1	0	0	24.87	124.5	75	143	8.74	335	5.6	6.7	59	49	45.9	7.8	1.4	60.7	4.19	3.72	139	5.98	4.05	3.51	1.1	0
0	56	2	1	1	0	0	0	30	166	62.7	84	93	0.9	0	0	0	1	1	0	0	22.75	125.5	73.5	135	6.21	237	5.2	6.5	20	25	49.1	11.6	3	59	4.78	4.18	137.9	4.71	1.21	2.14	1.8	0
1	56	3	1	1	0	0	0	30	180	87.05	93	97	0.92	0	0	0	1	1	0	0	26.865	124.75	74.75	174	7.12	256	6.3	6.6	62	24	44.7	13.88	1.8	73.9	7.69	4.84	139.7	5.65	1.13	4.08	0.83	0
1	56	2	1	1	0	0	0	0	180	81	95	102	0.93	0	0	0	0	1	0	0	25	124.5	77.5	151	7.57	184	5.6	7.2	94	54	46	16.8	4.3	76	6.92	4.03	140.9	3.84	2.55	1.52	1.32	0
1	56	3	1	1	0	0	0	30	178	75.15	85	94	0.9	0	0	0	1	1	0	0	23.715	127.25	76.25	140	4.75	210	5.1	4.1	26	17	45.1	15.3	2.6	79.1	5.71	4.37	140.4	3.59	2.25	1.63	1.24	0
0	56	2	1	0	0	0	0	30	162	61.8	78	88	0.88	0	0	0	2	1	0	0	23.54	124.5	73.5	130	6.74	181	5.7	6	14	21	45.7	18.84	2.66	69.7	4.86	3.67	140.2	4.61	1.89	2.93	1.3	0
1	56	3	1	1	0	0	0	30	172	62.4	78	86	0.9	0	0	0	2	1	0	0	21.09	127	71.5	149	4.27	192	5.6	5.9	18	19	49.8	12.3	1.6	86.3	5.65	4.07	136.7	3.87	1.78	1.83	1.27	0
1	56	3	1	1	0	0	0	60	170	73.8	92	102	0.9	0	0	0	1	1	0	0	25.53	126.5	74.5	163	5.72	226	6.3	6.2	18	20	48.4	15.08	2.57	92.6	6.77	4.71	137.7	5.09	2.79	3.04	1.06	0
0	56	3	1	1	0	0	0	30	162	67.35	85	93	0.91	0	0	0	2	1	0	0	25.66	125.5	75.25	131	7.92	232	5.5	6.1	13	18	45.1	11	1.57	65.33	5.18	4.03	140	4.25	1.34	2.51	1.41	0
1	56	2	0	1	0	0	0	20	170	72.6	83	108	0.77	0	0	0	1	1	0	0	25.12	126	78.25	81	8.9	281	5.3	6.5	17	22	44.6	9.1	2.05	24	6.02	4.69	133	4.28	1.21	2.06	1.29	0
1	56	2	1	1	0	0	0	0	175	79	92	96	0.95	0	0	0	0	1	0	0	25.79	124.5	75.5	161	5.3	157	5.6	5.4	15	17	50	9.9	1.4	92	3.69	4.75	142.2	6.3	1.95	4.33	1.26	0
1	56	2	1	1	0	0	0	50	168	86.7	84	94	0.89	0	0	0	1	1	20	1	30.715	124.25	73.75	170	5.46	225	5.6	6.4	21	18	46.7	19.67	2.68	54	3.89	4.11	140.9	3.83	6.65	0.89	1.16	0
0	56	2	1	1	0	0	0	30	160	69.1	82	96	0.92	0	0	0	2	1	0	0	26.99	121.5	71.5	127	4.04	231	5.3	6.5	24	24	43.7	15.02	2.5	63	6.07	4.26	140	4.77	2.03	2.86	1.24	0
1	56	2	1	0	0	0	0	30	170	84	87	97	0.89	0	0	0	1	0	5	1	29.06	130.5	75.5	146	10.21	164	6.1	6.5	25	21	47.9	20.66	3.11	73.8	7.63	3.77	139.8	2.45	3.16	2.88	0.79	0
0	56	3	1	1	1	0	0	30	162	60.5	82	90	0.91	0	0	0	2	1	0	0	23.05	129.25	75.75	149	5.61	329	5.4	6	17	17	46.3	11.07	1.7	77.8	4	4.01	143.3	5.89	1.9	3.9	1.28	0
0	56	2	0	1	0	0	0	30	167	80.3	85	95	0.89	0	0	0	1	1	0	0	28.785	127.5	81	143	5.11	245	5.3	6	17	18	49.1	9.5	1.8	54	5.63	4.05	139.3	3.52	2.16	1.78	1.22	0
0	56	2	1	1	0	0	0	0	157	62.3	83	90	0.92	0	0	0	2	1	0	0	25.27	121	74	141	8.04	176	5.9	6.2	34	22	49.7	10.5	1.36	56.6	5.69	3.94	139.3	5.06	2.1	3.13	1.08	0
0	56	2	1	1	0	0	0	30	162	60	78	86	0.9	0	0	0	2	1	0	0	22.86	120.5	72.5	127	6.38	283	5.4	5.7	19	16	42	8.21	1	63.17	6.26	3.66	139.9	3.45	1.17	1.63	1.39	0
0	56	2	1	1	0	0	0	40	172	75.55	87	93	0.935	0	0	0	2	1	0	0	25.535	121.5	73.25	129	7.93	312	6	6.3	18	20	46	9.2	1.39	60.5	3.84	3.67	141.4	5.75	2.89	3.15	1.16	0
0	56	2	1	1	0	0	0	30	160	73.1	60	90	0.66	0	0	0	2	1	0	0	28.55	124.5	73	115	5.59	174	5.8	5.5	14	19	42.6	10.7	1.4	70	5.58	4.45	140	5.35	1.13	3.6	1.55	0
0	56	3	1	1	0	0	0	60	160	55.2	71	87	0.82	0	0	0	2	1	0	0	21.56	122	79.5	131	6.37	314	5.3	6.1	15.98	20	47.5	7.7	1.7	76.06	5.11	4.03	138.3	7.88	3.13	5.13	1.53	0
1	56	2	1	1	0	0	0	20	170	72.8	83	95	0.87	0	0	0	1	1	2	0	25.19	119	79	152	4.98	172	5.4	5.8	26	22	48	11.48	1.21	90	5.64	4.11	135.8	4.13	1.2	2.7	1.06	0
1	56	3	0	1	0	0	0	0	165	64.75	80	90	0.88	0	0	0	0	1	10.5	0	23.775	127.75	70.5	139	5.47	217	5.4	6	22	24	45.7	12.4	2.81	47	5.24	4.01	134.5	4.4	0.88	2.97	1.27	0
1	56	3	1	1	1	0	1	30	173	78.4	95	116	0.81	0	0	0	1	1	0	0	34.08	120.5	71	140	6.61	191	6.1	5.6	17	43	47.9	15.06	2.08	90	5.13	4.45	140	6.57	1.44	4.76	1.28	0
0	56	3	1	1	1	0	0	40	166	58.05	75	90	0.83	0	0	0	2	1	0	0	21.06	121.75	72.75	136	6.78	282	5.1	5.8	39.96	35	48	12.3	1.6	73.9	4.77	4.11	143.3	5.03	1.96	2.85	1.64	0
1	56	3	1	1	0	0	0	0	178	75.8	82	92	0.89	0	0	0	2	1	0	0	23.92	121	73.5	131	6.14	229	5.2	6.2	44	42	43.4	8.9	2.33	84.8	5.12	4.22	140.6	5	1.35	3.18	1.42	0
0	56	3	0	1	0	0	0	20	178	74	84	88	0.95	0	0	0	1	1	0	0	23.35	127	77.5	119	5.75	306	5.3	6.3	24	25	45.2	9.7	0.44	50.1	5.6	4.45	140	5.69	2.5	3.48	1.12	0
0	56	2	1	1	0	0	0	30	165	59.8	77	90	0.86	0	0	0	1	1	5	1	21.96	124	74.5	118	7.73	263	5.7	5.9	11	21	47.6	6.07	1.28	46.3	4.13	4.16	137.4	4.82	1.84	2.54	1.16	0
1	56	3	1	1	0	0	0	50	168	73.75	92	107	0.855	0	0	0	1	1	0	0	26.125	124.5	75.5	156	5.77	266	5.4	5.8	32	28	47.2	8.33	1.72	83.4	5.72	4.2	137.8	6.17	1.35	3.76	1.86	0
0	56	3	1	1	0	0	0	30	162	62.5	76	90	0.84	0	0	0	1	1	0	0	23.81	126.5	79	126	5.29	234	5.7	6.5	25	24	50.1	71.86	7.58	57.4	16	4.01	139.7	4.98	0.85	3.78	1.47	0
0	56	2	1	1	1	0	0	60	162	60.7	78	85	0.91	0	0	0	1	0	0	0	23.12	123.5	72	131	7.75	263	5.7	6.1	19.72	21	49.1	10.31	1.01	52.3	3.69	4.33	138.7	5.86	1.66	3.36	1.46	0
1	56	3	1	1	0	0	0	20	169	68.85	83	95.5	0.865	0	0	0	1	1	0	0	24.12	127	75	146	5.75	168	6	6	37	23	49.2	8.1	1.4	91.22	4.9	4.06	137.9	5.17	1.54	3.31	1.14	0
1	56	2	1	1	0	0	0	0	172	72.55	80	90	0.88	0	0	0	0	1	0	0	24.52	124.25	75.25	153	7.21	228	6	6.3	25	24	48.4	18.63	2.2	65.4	5.38	4.08	137.7	5.1	1.34	3.52	0.95	0
0	56	2	1	1	0	0	0	30	162	76.85	86	96	0.895	0	0	0	1	1	0	0	29.275	125	73.5	128	8.87	291	5.4	9.1	52	41	48	49	7.58	66	6.19	4.12	140.5	4.03	0.96	2.38	1.44	0
0	56	2	1	1	0	0	0	30	162.6	72.4	79	96	0.82	0	0	0	2	1	0	0	27.38	126	77	167	4.81	196	5.3	5.6	25	24	44.7	23.11	3.05	83.4	7.46	3.98	144.1	4.77	2.25	2.94	1.13	0
0	56	3	0	0	0	0	0	30	163.25	69.9	85	97	0.875	0	0	0	1	1	0	0	26.22	120.75	74	139	6.57	231	5.4	6.1	9	20	45.5	15.6	4.23	60.7	4.85	4.35	140	3.33	1.83	1.5	0.99	0
1	56	2	1	1	0	0	0	30	173	66	86	98	0.87	0	0	0	2	1	0	0	22.05	120.5	77.5	147	7.91	147	5.6	6.4	21	22	50.1	19.1	3.3	76	6.39	4.11	130.3	4.36	1.67	2.28	1.32	0
1	56	2	1	1	0	0	0	0	177	83.05	92	105	0.88	0	0	0	1	0	0	1	26.505	129.75	77.25	161	6.75	226	6.3	6.7	28	18	47.9	10.4	2.8	68.7	5.18	4.14	140.4	3.51	1.62	1.43	1.09	0
1	56	2	1	1	0	0	0	30	168	82.7	88	100	0.88	0	0	0	2	1	0	0	29.295	127.75	76.25	173	5.94	82	5.3	6.2	79	32	51	23.74	5.72	74.9	5.61	4.01	140.2	3.74	1.3	2.43	1.3	0
1	56	2	0	1	0	0	0	30	175	78.9	90	99	0.9	0	0	0	2	1	0	0	25.755	125.25	77.5	157	6.05	223	5.7	6.3	31	23	50.1	11.98	1	73	4.6	4.35	140.5	4.05	1.17	3.25	0.99	0
1	56	3	1	1	0	0	0	60	178	72.4	80	96	0.83	0	0	0	1	1	0	0	22.845	123.5	76	158	4.59	187	6.4	6.5	23.06	21	47.9	11.57	1.39	72	7.42	4.08	138.6	7.46	2.5	4.62	1.57	0
0	56	2	1	1	1	0	0	45	163.05	71.5	86.5	103	0.84	0	0	0	1	0	0	0	26.89	130.5	79	135	4.69	269	5.5	6.3	20	23	47.6	11.48	2.08	52	3.92	4.06	140.8	6.36	1.45	3.75	1.71	0
1	56	3	1	1	0	0	0	30	170	75	82	92	0.89	0	0	0	2	1	0	0	25.95	119	71.5	155	6.83	173	5.3	5.6	24	21	49.1	16.1	3.18	61	5.02	4.23	140	4.98	1.21	3.57	1.12	0
1	56	2	1	1	0	0	0	30	166	53.8	73	83	0.88	0	0	0	1	1	0	0	19.52	127	77.5	136	8.5	179	5.38	5.4	38	36	47.6	10.97	3.64	57.74	6.41	4.3	140	3.36	1.13	1.21	1.59	0
0	56	2	1	1	1	0	0	0	153	56.8	74	88	0.84	0	0	0	2	0	0	0	24.26	125.5	76.5	132	5.55	282	5.3	6	16	18	45.7	11.1	3.28	69.5	5.47	4.48	139.5	3.81	1.22	1.51	1.88	0
1	56	3	1	1	0	0	0	30	176	70.95	88	96	0.92	0	0	0	1	1	0	0	22.9	128.75	77.25	118	4.84	189	5	6.2	126	70	44.8	35.5	4.69	57.1	6.45	4	138.5	3.92	0.78	1.5	1.51	0
1	56	3	1	1	0	0	0	40	180	74	88	96	0.91	0	0	0	2	1	6	1	22.83	123.5	84	145	7.9	164	5.3	5.4	15.42	17	46.05	24.7	3.87	72.3	4.48	4.1	138.4	5.69	1.62	3.15	1.6	0
0	56	2	0	1	0	0	0	30	162	65	80	95	0.84	0	0	0	2	1	0	0	24.76	115	39	121	5.8	217	5.3	6.5	22	19.45	46.5	8.85	1.44	57	3.96	3.73	135.5	4.3	1.04	2.09	1.45	0
1	56	2	1	1	1	0	0	30	165	72.7	82.5	114.5	0.715	0	0	0	1	0	3	0	26.7	123.5	75.75	149	5.81	173	5.4	5.9	22	23	44.1	15.67	4.26	79.6	6.25	4.22	136.7	4.04	0.89	2.56	1.36	0
1	56	2	1	1	0	0	0	0	166	51.8	78	90	0.86	0	0	0	0	1	0	0	18.79	121.5	72.5	134	7.92	176	5.6	6.4	25	22	43.6	11.39	4.28	69.5	4.41	4.1	140.6	4.34	1.66	2.48	1.3	0
0	56	3	1	1	0	0	0	30	156	54.2	75	87	0.86	0	0	0	1	1	0	0	22.265	122.75	78	146	5.2	260	6.3	5.3	20	21	45.2	12.4	3.34	54.6	6.33	4.43	143	4.94	0.75	3.04	2.06	0
1	56	3	1	1	0	0	0	60	164	60	78	96	0.81	0	0	0	2	1	0	0	22.3	125.5	75	145	8.48	321	5.1	6.1	22	23	46.2	6.86	1.3	64	3.38	4.46	137.3	4.33	1.56	2.93	1.25	0
0	56	2	1	1	0	0	0	30	162	70.2	87	95	0.915	0	0	0	1	1	0	0	26.745	123.5	76	131	5.61	114	5.6	7	15	35	43.9	40.59	19.44	58.63	6.34	5.93	135.9	4.39	0.96	1.98	2.47	0
1	56	2	1	1	0	0	0	40	170	72.35	86	94	0.91	0	0	0	1	1	0	0	25.03	122.75	74	134	9.41	179	5.5	6.2	19.23	24	46.9	18.2	5.9	59.6	6.75	4.11	138	4.44	0.91	2.59	1.8	0
0	56	3	1	1	0	0	0	0	160	45	74	86	0.86	0	0	0	0	1	0	0	17.57	124.5	75.5	135	6.01	245	5.7	6.9	37	26	46.35	9.65	1.61	82.2	6.95	4.02	141	4.77	2.7	2.37	1.3	0
1	56	3	1	1	0	0	0	40	162	77.05	93	102	0.91	0	0	0	1	1	10	0	29.355	126	76.5	174	6.07	287	6.1	6.5	30	25	47.8	10.5	1.8	43	16	4.61	143.8	4.95	1.96	3.4	0.95	0
0	57	2	1	1	0	0	0	0	158	53.2	82	86	0.95	0	0	0	2	1	0	0	21.31	121	74.5	135	6.55	188	5.7	6	24	25	48.6	14.3	5.76	43.9	5.6	4.2	138.4	5.1	1.85	2.78	1.95	0
1	57	2	1	1	0	0	0	30	173	78	86	101	0.85	0	0	0	2	1	0	0	26.06	123.5	80.25	154	4.86	165	5.3	5.4	26	21.48	47.5	13.37	1.5	76	4.64	4.38	138	4.74	1.86	3.41	1.08	0
1	57	2	1	1	0	0	0	30	178	82.3	84	91	0.92	0	0	0	1	1	5	1	25.97	125	72	155	4.61	220	5.3	6.4	37	31	49	15.33	3.1	66	5.94	4.35	140.4	4.32	1.33	2.06	1.6	0
1	57	2	1	1	0	0	0	0	176	83.8	88	96	0.92	0	0	0	0	1	0	0	27.05	125.5	80.5	164	4.88	167	5.7	5.8	71	48	47.7	17.9	2.1	94.93	5.69	3.72	141.2	4.08	2.4	1.73	1.1	0
1	57	3	1	1	0	0	0	60	172	70.3	86	103	0.83	0	0	0	2	0	0	1	23.76	123	75.5	162	5.83	190	5.7	5.8	17	23	47.9	16.33	2.1	59.01	4.93	4.29	140	5.92	1.6	3.67	1.48	0
1	57	2	1	1	0	0	0	50	172	63.2	80	92	0.87	0	0	0	1	1	12	0	21.36	124.5	75	162	7.22	252	6.2	5.4	14	20	48.2	17.7	4.28	100	5.44	4.63	139	6.28	1.03	4.07	1.93	0
1	57	2	1	1	0	0	0	30	180	75	102	117	0.87	0	0	0	2	1	4	1	23.14	125.5	74	146	6.21	173	5.9	6.6	17.5	28	44.7	19.57	2.75	74	6.23	4.05	138.2	4.84	0.69	2.81	1.42	0
1	57	2	1	1	0	0	0	30	175	84.5	95.3	100	0.95	0	0	0	2	0	0	1	27.59	125.5	76	149	7.69	198	5.4	6	19	18	49.1	10.9	2.5	67	6.58	4.52	141.6	4.36	1.22	2.92	1.19	0
0	57	2	1	1	1	0	0	30	155	55.9	77	91	0.845	0	0	0	1	1	0	0	23.26	131.5	79.25	151	5.19	209	5.5	6	24	31	49	14.92	2.17	70	4.75	4.22	141.5	5.09	0.75	3.41	1.5	0
0	57	2	1	1	0	0	0	0	161	60.2	80	95	0.84	0	0	0	2	1	0	0	23.22	116.5	79	132	6.14	201	5.3	6	17	24	45.9	12.9	3.3	79.2	8.83	3.67	141	5.65	2.39	2.81	2	0
1	57	3	1	1	0	0	0	30	176	90.6	96	103	0.93	0	0	0	2	1	10	2	29.24	124	76	144	6.44	223	5.5	6.2	21	14	51	10.53	1.44	66.5	3.9	4.34	140	3.21	1.39	1.69	0.97	0
0	57	3	1	1	0	0	0	35	163	61.75	73	80	0.91	0	0	0	1	1	0	0	23.235	123.5	77.75	137	7.93	250	6	6.2	21	19	47.2	7.9	1.28	66	4.8	4.05	139.7	5.39	1.14	3.91	1.15	0
0	57	3	1	1	0	0	0	30	160	65	78	90	0.86	0	0	0	2	1	0	0	25.39	130.5	71	132	6.55	286	5.8	6.3	17	18	44.5	7.1	1.7	65	6.6	4.25	139.8	6.41	1.93	4.63	1.48	0
1	57	2	1	1	0	0	0	30	178	64.5	80	88	0.91	0	0	0	1	1	20	1	20.35	125	72.5	149	6.2	242	5.6	6	12.62	19	45.2	13	3.18	62	4.95	4.29	140.2	5.51	3.41	2.63	1.33	0
1	57	2	1	1	1	0	0	30	183	67.35	81	92	0.88	0	0	0	1	1	0	0	20.105	129.25	76	160	6.63	176	6	6.1	19	19	44.7	11.1	1.33	64.42	4.87	3.8	142	5.57	0.88	4.56	1.27	0
1	57	3	1	1	0	0	0	50	175	64.55	81	94	0.86	0	0	0	1	1	0	0	21.07	123.75	76	155	3.35	153	5.3	6.7	27	18	46	10.4	1.26	71.3	6.19	4.07	137.5	3.71	1.02	2.51	1.01	0
0	57	2	1	1	0	0	0	30	155	49.95	80	86	0.93	0	0	0	1	1	0	0	20.785	122.25	70	131	4.22	222	5.3	6.2	22	23	47.5	4.85	1.7	68	9.08	4.66	139.1	6.77	1.54	4.69	1.39	0
1	57	2	1	1	0	0	0	30	175	73.1	86	90	0.955	0	0	0	1	1	0	0	23.865	133.5	81.5	146	8.63	187	5.5	5.5	14	15	49.5	13.06	2.9	97	5.84	4.32	139.5	3.61	1.21	2.56	0.98	0
1	57	2	1	1	0	0	0	30	170	73	90	100	0.9	0	0	0	1	1	5	1	25.25	120.5	70.5	155	5.14	112	6.1	7.4	34	28	49	6.7	1.7	94	6.06	4.3	141.3	5.94	1.12	4.01	1.48	0
1	57	2	1	1	0	0	0	30	172	57.6	82	91	0.9	0	0	0	2	1	0	0	19.465	125.75	75	157	6.29	196	6.1	6.1	20	23	45.9	8.1	1.3	83	5.46	4.58	141.6	6.63	2.36	5.22	0.87	0
0	57	3	1	1	0	0	0	30	168	76.3	86	95	0.91	0	0	0	2	1	0	0	27.025	125.25	75	142	7.02	231	6	6	31	30	51	13.7	1.57	50.9	6.37	4.01	142.9	5.34	2.08	3.3	1.24	0
1	57	3	0	1	0	0	1	30	170	68.1	82	87	0.94	0	0	0	2	1	10	1	23.56	124.75	79	155	6.21	262	5.7	6	54	34	51.3	11.1	2.78	63	5.01	4.26	138.5	5	1.61	3.22	1.24	0
1	57	2	1	1	0	0	0	60	175	87.6	85	100	0.85	0	0	0	1	1	0	0	28.605	98.25	55.5	149	4.33	165	5.6	5.5	45	36	46.9	9.78	7.3	79.1	5.21	4.67	140.5	4.54	1.92	2.47	1.3	0
1	57	3	1	1	0	0	0	60	173	68.35	83	98	0.85	0	0	0	2	1	2	2	22.835	124.75	76	162	6.81	316	5.5	6.1	17	18	48.4	12	2.4	69.18	4.9	4.4	142.3	5.64	1.85	3.43	1.53	0
1	57	2	1	1	0	0	0	30	174.9	94.15	99	103	0.96	0	0	0	1	1	0	0	30.775	127	77	164	8.77	138	6.1	7.2	17	20	46.2	11.66	4.72	50	5.13	3.53	141.5	2.91	1.09	1.64	0.89	0
1	57	2	1	1	0	0	0	0	175	88	90	100	0.9	0	0	0	0	1	0	0	28.73	124.5	74.5	158	5.55	191	5.7	6.1	21	20	47.24	11.72	2.49	65	6.63	3.74	138.9	3.91	1.22	2.24	1.2	0
1	57	2	1	1	0	0	0	30	170	78.4	87	95	0.92	0	0	0	1	1	0	0	27.12	124	72	131	6.55	220	5.6	6.1	22	22	44.5	12.12	1.9	66.8	4.82	4.09	140.4	5.65	1.6	3.62	1.21	0
0	57	2	1	1	0	0	0	30	162	64.8	76	82	0.92	0	0	0	2	1	0	0	24.69	125	74.5	126	11.06	207	5.6	6.1	14	21	45.8	11.1	2.1	52.4	7.07	3.86	140.4	4.61	1.61	2.57	1.21	0
1	57	2	1	1	0	0	0	60	177	84.1	96	98	0.97	0	0	0	1	1	0	0	26.84	122	73	157	5.34	254	5.3	5.9	26	18	45.9	12.6	7.3	90.4	4.57	4.46	140.2	4.93	2.53	3.32	1.04	0
0	57	3	0	1	0	0	0	30	165	78.4	94	103	0.91	0	0	0	2	1	0	0	28.79	122.5	75	142	6.57	250	5.6	6.4	19	24	47.2	6.1	1.4	67.7	4.49	4.21	140.5	6.2	2.7	3.82	0.95	0
1	57	3	1	1	0	0	0	0	161	65.4	86	94	0.91	0	0	0	0	1	0	0	25.23	125.5	73.5	124	5.34	189	6.5	6.3	27	24	47.7	5	1.3	90	5.54	4.45	137	6.39	2.79	4.67	0.91	0
1	57	3	0	1	0	0	0	30	174	76.6	85	95	0.89	0	0	0	1	1	0	0	25.3	124	75.5	145	5.03	171	6.2	6	17	17	42.8	16.16	2.9	79.4	4.95	4.37	139.5	3.64	0.84	2.04	0.99	0
1	57	2	1	1	0	0	0	30	180	78.4	92	95	0.96	0	0	0	2	1	0	0	24.19	124.5	76.5	158	6.59	230	5.2	6	17	18	47.7	9.65	1.22	62	5.31	4.11	140.4	6.91	1.81	5.35	1.36	0
0	57	3	1	1	0	0	0	40	160	79.6	90	102	0.88	0	0	0	1	1	0	0	31.09	127.5	78	134	9.37	337	6.2	7.2	26	26	49.6	13.4	2.28	60	5.77	4.19	138.4	4.66	2.67	2.41	1.11	0
0	57	2	1	1	0	0	0	30	164	69.75	84	101	0.83	0	0	0	1	1	0	0	25.93	125.75	71.5	128	5.88	322	6.4	6.7	22	18	42.5	6.97	2.98	57	2.94	4.32	140.9	5.43	1.43	2.18	1.72	0
0	57	3	0	1	1	0	0	30	163	61.4	96	108	0.88	0	0	0	1	0	0	0	23.105	125.5	74	122	7.53	264	5.5	6.9	42	21	47.3	11.98	1.26	73	5.7	4.42	141.2	4.89	1.77	2.58	1.71	0
0	57	2	1	1	0	0	0	20	158	61	67	86	0.77	0	0	0	2	1	0	0	24.43	122.5	72	158	4.77	219	5.3	5.7	27	24	46.6	14.3	3.1	46	6.28	4.43	139	4.97	0.57	3.26	1.86	0
1	57	3	1	1	1	0	0	45	162.5	70.75	84	94	0.89	0	0	0	1	1	0	0	26.8	127	74.25	147	4.75	240	5.3	5.6	30.5	20	47.2	12.62	1.26	57	7.3	3.74	137.7	4.24	1	3.29	0.76	0
1	57	3	0	1	0	0	0	50	165	83.35	100	110	0.9	0	0	0	0	1	5	0	30.61	127.5	78.25	168	6.78	216	5.6	6.4	10	18	46	8.9	1.83	71.7	3.16	4.69	138.2	5.35	2.58	3.54	1.03	0
1	57	3	1	1	0	0	0	0	165	75.2	88	96	0.91	0	0	0	0	1	0	0	27.62	123	72.5	153	6.68	266	5.3	6.1	46	25	49	12.38	2.5	80.6	7.04	3.8	138.7	5.42	1.72	4.07	0.95	0
0	57	3	1	1	1	0	0	30	164	63.8	84	92	0.91	0	0	0	2	0	0	0	23.72	122.5	76	142	8.08	287	5.6	6.1	14	23	44	14.3	2.5	54	5.45	3.82	138.2	5.07	1.31	3.11	1.42	0
1	57	2	1	1	0	0	0	60	170	74.7	90	100	0.9	0	0	0	1	1	0	0	25.84	126	75.5	154	5.74	270	5.8	7	14	17	49	13.5	2.17	89.7	4.92	4.42	140.4	5.41	1.42	3.7	1.15	0
1	57	2	1	1	0	0	0	60	170	84.9	90	100	0.9	0	0	0	2	1	0	0	29.37	127	76.5	128	5.2	159	5.2	5.6	25	22.87	45.3	13.92	1.85	82	3.66	3.91	137.5	5.97	1.28	4.59	1.15	0
0	57	2	1	1	0	0	1	20	168	67.8	85	96	0.88	0	0	0	2	1	0	1	24.02	116.5	73.5	135	7.23	168	5.8	6.1	9	17	44.1	14.89	1.21	83	5.46	4.78	140.4	6.86	0.67	4.04	2.19	0
1	57	2	1	1	0	0	0	0	166	71	82	94	0.87	0	0	0	0	1	0	0	25.76	126	72.5	137	6.51	190	5.3	6.3	14	23	47.34	31.1	8.97	84	5.48	3.63	133.1	4.63	1.19	2.71	1.28	0
0	57	2	1	1	0	0	0	60	169	57.1	81	90	0.9	0	0	0	2	1	0	0	19.99	131	83	124	6.07	296	4.97	6	11	19	47.5	5.62	1.4	74.9	4.52	4.29	136.3	5.79	1.48	3.14	1.8	0
1	57	2	1	1	0	0	0	40	169	87.05	100	110	0.905	0	0	0	1	1	0	0	30.475	128.25	73.75	161	3.78	192	6	7.3	37	21	43.2	12.2	1.6	77.6	5.81	4.19	139.7	4.34	1.11	3.09	0.92	0
0	57	3	1	1	1	0	0	30	160	58.8	80	92	0.86	0	0	0	1	1	0	0	22.96	126.5	75.5	135	6.76	296	5.6	6.5	9	16	51.4	5.29	1.4	56.2	6.02	3.99	141.3	5.26	2.64	2.93	1.02	0
0	57	2	1	1	0	0	0	0	160	57.7	82	96	0.85	0	0	0	2	1	0	0	22.53	128.5	81	154	4.56	341	5.5	6.4	15	19.08	48.36	16.4	1.71	63.9	3.77	4.44	139.1	6.1	1.25	4.17	1.39	0
1	57	2	1	1	0	0	0	30	168	70	83	98	0.84	0	0	0	2	1	3	0	24.8	124	74.5	155	4.4	270	5.3	6	10	12	49.9	8.48	0.7	71	5.28	4.65	137.2	6.32	1.24	4.76	1.18	0
1	57	3	1	1	0	0	0	30	172	75.6	89	100	0.89	0	0	0	2	1	10	0	25.55	124.5	77	123	5.92	155	6.3	6.4	14	18	43.8	10.9	3.7	81.3	2.12	3.9	135.3	4.02	3.11	1.48	0.84	0
1	57	3	1	1	0	0	0	30	170	80.3	91	100	0.91	0	0	0	1	1	0	0	27.78	129.25	78.5	139	5.23	239	5.6	6.6	14	26	47.5	11.43	1.7	93	8.39	4.4	138.6	5.17	1.17	4.32	0.79	0
1	57	3	1	1	0	0	0	30	170	59.1	77	86	0.9	0	0	0	1	1	0	0	20.44	125	73.5	144	6.26	186	6.2	6	17.02	18	41.8	3.94	2.98	103.9	4.3	4.85	143	3.62	1.75	1.76	0.98	0
1	57	2	1	1	0	0	0	30	170	68.4	87	98	0.885	0	0	0	2	1	7.5	0	23.66	123.25	74.5	133	6.61	208	5.5	6	19	17	41.3	10.87	2.67	106	10.05	4.41	143.1	3.84	1.7	1.91	1.5	0
0	57	2	1	1	0	0	0	30	155	55.7	82	89	0.92	0	0	0	1	1	0	0	23.18	124	75	134	5.03	271	5.5	6.5	19	21	47.5	10.75	0.5	42	3.4	3.53	136	4.29	1.96	2.47	1.04	0
1	57	2	1	1	0	0	0	30	160	56.45	76	88	0.86	0	0	0	1	1	5	0	22.045	122.25	75.75	158	6.18	218	5.3	5.5	22	20	45.3	8.2	1.64	80.5	3.93	4.6	133	6.25	2.73	4.05	1.19	0
1	57	3	1	1	0	0	0	50	182	79	83	95	0.87	0	0	0	1	1	0	0	23.84	128.5	70.5	134	6.29	190	5.6	6	54	34	49.67	21.2	4.85	58	5.48	4.19	141.4	5.06	0.65	3.71	1.12	0
1	57	3	0	1	0	0	0	30	175	70	76	86	0.88	0	0	0	1	1	5	0	22.85	129	78.5	161	6.53	136	5.7	5.7	29	24	48.2	8.9	1.63	81	5.51	4.28	138.2	4.43	1.39	2.75	1.44	0
1	57	2	1	1	0	0	0	40	172	74.15	88	98	0.895	0	0	0	1	1	9	1	25.06	126.5	74.75	148	7.15	78	5.8	5.9	23.57	17	46.3	12.95	4.33	70.1	6.48	4.25	142	4.2	1.5	2.51	1.22	0
1	57	2	1	1	0	0	0	30	170	85	92	96	0.95	0	0	0	2	1	0	0	29.41	120.5	71	137	8.47	223	5.6	6.9	44.4	20.6	46	15.1	2.83	70	6.22	4.42	137.6	4.49	1.5	3.05	0.88	0
1	57	2	1	1	0	0	0	30	170	64.95	84	92	0.91	0	0	0	2	1	0	0	22.47	122	76	162	5.88	203	5.6	6.2	21	19	49.8	14.15	2.8	48	7.84	4.27	140	5.21	0.99	3.55	1.4	0
1	57	3	1	1	0	0	0	30	178	77	88	99	0.88	0	0	0	2	0	0	1	24.3	128.5	78.5	164	5.23	174	5.7	6.1	16	20	49.8	18.6	5.51	57.4	5.62	4.36	141.3	5.29	0.8	3.99	1.32	0
1	57	3	1	1	0	0	0	30	170	66.7	78	96	0.81	0	0	0	1	1	0	0	23.07	123.5	72	134	6.78	186	5.6	6	14	15	46.3	11.64	2.26	75.9	5.01	3.82	130.4	5.59	3.19	3.15	0.91	0
0	57	3	1	1	0	0	0	30	170	72	84	99	0.85	0	0	0	1	1	0	0	24.91	133	83	130	5.72	221	5.1	5.8	35	30	47.7	15.55	1.3	53	6	3.93	141	5.6	0.73	4.17	1.31	0
0	57	2	1	1	0	0	0	30	157	54	75	96	0.78	0	0	0	1	0	0	0	21.91	119.5	74.5	138	7.16	219	5.4	6.3	19	19	45.33	18.76	2.75	61	5.49	4	133	4.96	1.47	2.39	1.69	0
1	57	3	1	1	0	0	0	40	170	79.2	96	118	0.81	0	0	0	1	1	0	0	27.4	123.5	77	134	4.82	188	6.1	6	43	33	47.79	7.19	2	114.5	6.17	4.26	140	3.29	1.01	1.64	1.4	0
1	57	3	1	1	0	0	0	50	170	90	92	107	0.86	0	0	0	1	1	13	0	31.14	126	73.5	150	5.08	191	6.6	6.5	22	18	47.34	8.49	0.4	74.9	5.95	3.92	135.3	5.11	1.39	3.86	1.14	0
0	57	2	1	1	1	0	0	30	160	54.9	82	97	0.845	0	0	0	2	1	0	0	21.44	123.5	73.5	127	9.96	203	5.2	6.4	19	30	45.5	13.89	2.02	70	5.6	4.3	140.4	6.34	2.09	4.77	1.31	0
1	57	3	1	1	0	0	1	35	188	93.8	89	98	0.9	0	0	0	2	0	0	1	26.53	121	73.5	165	5.63	250	5.9	5.6	37	24	49.8	17.44	2.5	42	6.02	3.94	143	5.07	1.97	2.99	1.16	0
0	57	2	1	1	0	0	0	30	156	67.45	86	90	0.955	0	0	0	1	1	0	0	27.71	123.5	74.75	144	5.46	255	5.2	6.1	31	26	49.5	8.41	2.1	60	3.47	4.71	137.4	4.12	3.13	2.06	0.95	0
0	57	2	1	1	0	0	0	20	166	65.2	76	84	0.9	0	0	0	2	1	0	0	23.66	123.5	73.5	138	6.21	219	5.9	5.5	35	17	48	13.38	1.8	58	3.96	4.25	142.1	5.25	1.49	2.66	1.93	0
0	57	2	0	1	1	0	0	30	160	64.8	74	88	0.84	0	0	0	1	1	0	0	25.31	124.5	75	145	4.24	253	6.2	6.2	59	50	49.1	10.7	1.4	46	5.24	4.37	142	6.03	2.11	4.28	1.01	0
1	57	3	1	1	0	0	0	0	176	86.8	90	100	0.9	0	0	0	2	1	0	1	28.02	132.5	83.5	148	6.71	224	5.9	5.7	29	25	44.9	6.07	1.7	65.73	5.82	3.72	140.3	5.52	1.28	3.7	1.12	0
1	57	3	1	1	0	0	0	20	187	83.9	86	94	0.91	0	0	0	1	1	0	1	23.99	121	79	159	6.25	176	5.4	5.2	24	25	46	20.2	4.53	93.3	6.14	4.33	141.6	3.8	1.17	2.23	1.07	0
1	57	3	1	1	1	0	0	30	170	75.8	85	95	0.89	0	0	0	2	0	0	1	26.22	125	74	141	6.51	257	5.4	6.1	12	17	51.7	13	2	60	5.13	3.73	139	4.6	0.63	2.57	1.77	0
1	57	2	1	1	0	0	0	40	167	64	88	98	0.89	0	0	0	1	0	0	0	22.94	124.5	74.5	157	5.75	306	5.3	6	17	17	47.6	4.6	0.7	67	6.44	4.29	139	6.84	1.56	5.38	0.93	0
1	57	3	1	1	0	0	0	30	173	70.2	83	92	0.9	0	0	0	2	1	8	0	23.45	121.75	74.5	163	5.43	158	5.5	6.1	21	17	46	20.9	4.26	85.1	5.97	4.08	140.3	3.22	0.69	2.02	0.88	0
0	57	2	1	1	0	0	0	30	166	70	87	102	0.85	0	0	0	1	1	0	0	25.4	120.5	69.5	137	7.25	257	5.1	6.4	15	16	47.2	7.4	1.54	52.91	6.6	4.23	140.7	4.91	3.09	3.25	1.08	0
1	57	3	1	1	0	0	0	40	170	70.85	94	101	0.93	0	0	0	2	1	0	0	24.51	123.25	77.25	167	4.44	102	6	6	24	19	47.2	21.93	5.72	68.9	3.83	3.95	142.2	4.17	1.2	2.42	1.24	0
1	57	3	1	0	0	0	0	30	174	60.8	80	96	0.83	0	0	0	2	1	5	0	20.08	125.5	76	157	5.87	155	5.8	5.4	19	22	49	13.59	1.21	57	5.36	3.73	125.9	4.31	1.23	2.06	1.47	0
1	57	2	0	1	0	0	0	30	170	65.45	78	95	0.82	0	0	0	2	1	3	1	22.64	125.25	76.5	157	6.47	266	5.7	5.5	15	23	47.9	9.97	1.78	54	4.01	4.29	139.5	8.42	1.17	7.24	1.34	0
1	57	2	1	1	0	0	0	30	173	96	99.4	102	0.97	0	0	0	1	0	10	1	32.07	126	77	157	6.18	183	5.6	6.1	22	22	47.7	18.83	5.9	62.5	3.78	3.73	140.3	5.03	1.97	3.3	1.08	0
0	57	2	1	1	0	0	0	0	171	76	89	96	0.92	0	0	0	0	1	0	0	25.99	122	77.5	132	7.05	232	5.4	5.6	14.33	12	51.7	8.24	2.98	51.4	4.83	3.93	136.2	6.01	2.42	3.5	1.22	0
1	57	2	0	1	0	0	0	20	174	70.55	82	87	0.94	0	0	0	1	1	8	1	23.295	123.75	74.75	135	8.98	238	5.8	7.3	25	22	46.5	8.3	1.8	71	5.57	4.19	141	4.38	0.78	3.73	1.17	0
1	57	2	1	1	0	0	0	30	170	73.4	94	100	0.94	0	0	0	1	1	5	1	25.395	128	75.75	140	7.46	168	6	6.1	16	23	45.9	17.73	2.9	88	5.93	4.15	140.7	4.35	0.72	2.39	1.31	0
0	57	3	0	1	0	0	0	35	160	68	82	90	0.91	0	0	0	2	1	0	0	26.56	121	68	131	9.71	305	6	5.3	34	28	46.5	7.8	1.4	57.9	3.36	4.22	141.9	4.25	1.94	2	1.37	0
0	57	2	1	1	1	0	0	60	165	74.85	85	100	0.85	0	0	0	2	1	0	0	27.49	127.25	79	133	6.77	275	5.4	8	77	47	51.4	11.46	3.34	54	5.57	4.38	142	5.24	1.9	3.23	1.53	0
0	57	2	1	1	1	0	0	0	165	73	98	105	0.93	0	0	0	0	0	0	0	26.81	121	73.5	134	6.68	251	5.5	6.3	13	14.4	47.9	5.88	1.8	68.6	5.63	4.72	137.8	5.55	2.5	3.46	1.23	0
1	57	2	0	1	0	0	0	0	175	89.8	100	110	0.9	0	0	0	0	1	0	0	29.32	123.5	76.5	151	6.7	127	5.5	5.8	37	27	48.2	11.2	3.67	92	5.68	4.11	138	2.99	1.23	1.59	1.24	0
0	57	3	0	1	0	0	0	30	164	58.45	84	91	0.92	0	0	0	1	0	0	0	21.725	130.75	75.5	128	6.29	242	6.6	6.2	16	22	47.5	13.3	0.7	80.7	4.65	3.84	141.9	3.58	2.32	1.87	1.01	0
1	57	2	1	1	0	0	0	30	174	84	90	96	0.93	0	0	0	2	1	0	1	27.74	126	74	151	6.04	259	5.3	5.8	54	28	48.5	12.06	1.89	71	4.73	4.24	140.4	6.95	2.05	4.73	1.37	0
1	57	3	1	0	0	0	0	40	177	82.65	93.5	112	0.835	0	0	0	1	1	0	0	26.505	129.5	74.25	159	4.36	173	6.9	6.1	32	25	49.7	11.62	1.6	74.6	3.88	4.54	138.1	7.79	1.59	5.25	1.45	0
0	57	3	1	1	1	0	0	30	159	56.8	78	96	0.81	0	0	0	2	0	0	0	22.46	126	74.5	139	5.66	225	5.8	5.9	28	30.63	51.3	14.15	2.5	79	6.84	3.89	145.27	6.27	2.59	3.8	1.35	0
0	57	2	1	1	0	0	0	30	160	80.8	103	113	0.91	0	0	0	1	1	0	0	31.555	125	73.25	151	8.04	282	6.5	6.7	44	47	46	12.92	1.97	69	8.1	4.39	142.2	5.69	2.7	3.67	1.27	0
0	57	2	1	1	0	0	0	30	155	58.85	85	90	0.94	0	0	0	1	1	0	0	24.49	122.75	72.75	142	4.48	217	5.6	5.8	17.5	18	49	6.8	0.7	79.6	5.11	4.55	140.1	4.31	3	2.47	0.86	0
1	57	2	0	1	0	0	0	30	170	68.8	85	94	0.9	0	0	0	2	1	0	0	23.8	124.5	74	147	6.14	283	5.8	7.1	15	12	48.5	7.53	1.2	77	7.09	3.88	135.9	5.1	1.7	3.33	1.15	0
0	57	2	1	1	0	0	0	30	160	62.95	82	94	0.87	0	0	0	2	1	0	0	24.585	122.25	77.25	132	5.52	221	5.8	7.2	19	17	46.6	6.94	1.3	64	4.96	3.88	138.9	7.8	2.79	4.04	2.01	0
1	57	3	1	1	0	0	0	0	176	83	96	99	0.96	0	0	0	0	1	0	0	28.05	124	73.5	151	7.62	228	5.1	5.4	31.59	29	49.1	21.06	2.7	76.6	4.51	3.99	140.5	4.96	1.81	3.78	0.97	0
0	57	3	1	1	1	0	0	0	165	60.2	80	90	0.88	0	0	0	2	0	0	0	22.11	126.5	73	133	3.48	187	5.4	6.1	27	24	43.2	19.79	2.9	67.6	7.49	4.07	142	6.26	0.66	4.42	1.57	0
0	57	3	0	1	0	0	0	30	160	65.8	80	96	0.83	0	0	0	2	1	0	0	25.7	116.5	79	140	6.33	278	5.4	7.5	32	21	43.2	6.6	2.01	56.5	3.62	4.33	138.5	5.1	0.69	3.01	1.56	0
1	57	2	1	1	0	0	0	0	176	74.6	91	98	0.925	0	0	0	0	1	0	0	24.075	123.25	72.5	162	7.85	204	5.3	6.4	23.97	18.14	46.6	13.22	2.8	79.9	5.51	4.52	138	5.47	1.78	3.44	1.23	0
1	57	2	1	1	0	0	0	20	170	60.6	80	90	0.88	0	0	0	2	1	0	0	20.72	118	63.5	142	6.21	199	5.5	5.8	29	23	46.8	16.97	1.91	80	9.33	4.78	133.3	5.07	0.8	3.45	1.33	0
1	57	3	0	1	0	0	0	0	175	77.7	92	101	0.91	0	0	0	1	0	0	0	25.365	127.5	77	136	7.58	306	5.8	6.2	20	26	44.7	11.9	1.8	60.7	7.14	4.63	134.5	4.19	1.28	2.54	1.33	0
1	57	2	0	1	0	0	0	60	170.8	57.9	77	86	0.895	0	0	0	2	1	0	0	18.9	123	73.25	146	4.59	148	5.3	5.9	24.64	22	46.6	10.07	1.7	75.19	4.46	4.21	138.7	3.87	1.3	2.3	1.1	0
1	57	2	1	1	0	0	0	30	172	85.7	89	96	0.92	0	0	0	1	1	0	0	28.965	125.5	74.5	155	4.27	154	6.2	6.4	29	28	48.5	23.01	14.13	60.3	5.23	4.91	137.3	2.73	2.15	4.16	1.09	0
0	57	2	0	1	0	0	0	0	160	58.2	78	93	0.84	0	0	0	0	1	0	0	22.73	125.5	77.75	131	7.29	256	5.4	6.3	17	17	43.9	4.7	1.39	54	4.82	3.69	139.9	4.67	2.47	2.5	1.39	0
0	57	2	1	1	0	0	0	30	155	60	83	97	0.85	0	0	0	2	1	0	0	24.97	125	79	137	6.32	261	5.9	5.8	13	18	44.37	15.7	2.31	80.08	4.03	4	141.3	7.2	1.81	5.28	1.44	0
1	57	2	0	1	0	0	0	30	167	80	99	106	0.93	0	0	0	2	1	5	0	28.68	120.5	79	151	7.73	238	5.6	6.3	26	20	47.7	16.69	4.85	72	5.78	4.28	139.3	4.9	1.52	3.42	1.28	0
1	57	2	0	0	0	0	0	50	178	80.95	87	96	0.905	0	0	0	1	1	0	1	25.25	122.5	74.25	157	5.07	305	5.3	6	25	21	45.33	7.47	1.32	48	4.01	3.77	140.9	5.16	2.73	3.17	1.09	0
0	57	3	0	1	0	0	0	50	158	66.65	87	93	0.935	0	0	0	1	1	0	0	26.69	125.5	73	118	7.83	284	6.2	6.5	27	21	46.6	9.7	1.4	78	4.54	4.19	140.4	3.91	1.39	2.73	0.73	0
1	57	2	1	1	0	0	0	30	190	89	86	102	0.84	0	0	0	2	1	0	0	24.65	124	70.5	139	4.33	196	5.6	5.6	14	17	49	17.6	8.1	77	5.99	3.89	130.4	3.2	0.46	1.59	1.6	0
0	57	2	0	1	0	0	0	30	168	58.8	78	94	0.82	0	0	0	1	1	0	0	20.83	124	75	121	4.34	250	6.1	6.4	23	28	44.7	8.9	1	56.71	6.4	4.47	140.6	5.72	1.56	4.02	1.34	0
1	57	2	0	1	0	0	0	0	170	80	94	100	0.94	0	0	0	0	1	0	0	27.68	119	76.5	146	6.41	220	5.3	6.1	15	24	45.5	21.13	6.9	86	5.77	4.76	135	2.89	1.47	2.01	0.96	0
0	57	3	1	1	0	0	0	30	162	59.3	80	89	0.9	0	0	0	1	1	0	0	22.59	122.5	74	123	5.99	185	5.7	6	24	23	45	10.7	1.8	62	7.67	3.96	138.7	4.34	0.48	2.71	1.5	0
0	57	2	0	0	0	0	0	0	162	65	85	96	0.88	0	0	0	0	1	0	0	24.76	127	79.75	127	5.59	248	6.1	6.5	21	20	46.1	11.2	4.03	51	4.66	4.72	138.2	4.27	1.55	2.78	1.28	0
0	57	3	1	1	0	0	0	60	159	81.7	94	102	0.92	0	0	0	1	1	0	0	32.31	126.25	76.5	137	5.08	232	6	6.4	24	18	48.5	13.6	3.28	54.69	4.5	4.74	140.7	3.93	1.75	2.21	1.12	0
1	57	2	0	1	0	0	0	30	169	72.5	80	86	0.93	0	0	0	2	1	5	1	25.38	128	77.5	163	5.99	244	5.9	5.9	32	72	48.36	17.27	4.11	83	3.98	4.05	140.7	5.6	2.07	4.24	1.18	0
1	57	2	1	1	0	0	0	30	173	75.5	85	93	0.885	0	0	0	1	1	7	0	25.145	124	73.5	141	6.07	175	6.1	7.3	33	27	43.6	15.6	2.58	65	4.89	3.35	137.41	5.09	1.02	3.39	1.27	0
0	57	3	1	1	0	0	0	30	158	56.5	77	91	0.845	0	0	0	1	1	0	0	22.63	124	74.25	122	9.64	261	5.5	6.1	16	18	46.2	5.36	1.8	59	3.68	4.22	136.2	5.94	1.81	3.44	1.71	0
0	57	2	1	1	0	0	0	30	163	77.1	86	97	0.89	0	0	0	2	0	0	0	29.01	125.5	75.5	125	4.74	298	6.31	6.8	22	24	46.3	18.02	4.26	57	2.7	4.81	138.5	3.72	1.06	2.1	1.26	0
1	57	2	1	1	0	0	0	0	168	79.8	86	98	0.87	0	0	0	2	1	0	0	28.27	121	80.5	134	9.68	221	5.8	6.1	14	16	9.4	6.9	2.26	58	5.33	3.69	143.4	4.57	0.54	3.51	1.09	0
1	57	3	1	1	1	0	0	60	170	65.8	85	100	0.85	0	0	0	2	0	0	0	22.76	123.5	75.5	130	4.02	182	5.6	6.2	16	15	46.2	8.17	2.39	60	8	3.93	139.5	4.09	1.49	2.67	1.07	0
0	57	2	1	1	0	0	0	30	162	82	80	86	0.93	0	0	0	1	0	0	0	31.24	124.5	76	140	5.66	238	6	6.3	26	22	47.6	6.99	1.4	49	4	4.47	140.3	3.4	1.77	1.6	0.94	0
0	57	3	1	1	0	0	0	30	170	53	80	91	0.87	0	0	0	2	1	0	0	18.33	120.5	70.5	146	5.23	215	5.8	6.5	20	18	49.8	16.08	2.19	51	5.23	3.96	142.2	4.78	1.09	2.94	1.52	0
0	57	3	1	1	0	0	0	30	155.5	62.55	74	86	0.86	0	0	0	1	0	0	0	25.855	123	72.5	143	5.79	295	5.3	6.4	23	24.26	49.7	7.8	1.2	54.89	5.21	4.7	135.6	8.57	1.52	6.65	1.15	0
1	57	2	1	1	0	0	0	30	170	65.85	83	94	0.88	0	0	0	1	1	0	0	22.78	125	75.75	154	7.06	229	5.4	6.5	43	23	48.4	10.07	1.73	51.8	5.7	4	143	4.1	0.81	3.32	1.11	0
1	57	2	1	1	0	0	0	30	170	75.3	86	84	1.02	0	0	0	2	1	20	2	26.05	122.5	71.5	159	7.03	207	5.3	7.2	26	25	49.5	17.22	2.7	74.32	21	4.83	141	4.22	1.16	2.41	1.61	0
1	57	3	1	1	0	0	0	30	182	89.2	93	102	0.91	0	0	0	2	1	0	0	26.92	128.5	81.5	149	5.28	283	5.3	5.8	84	48	42.5	15.01	2.1	61	4.99	4.46	139.7	4.01	0.87	2.09	1.19	0
1	57	2	1	1	0	0	0	30	160	66.1	83.5	93	0.895	0	0	0	2	1	0	0	25.82	132.5	78.25	164	7.74	198	5.4	6	33	27	45.2	11.3	1.8	77	5.15	4.11	136	5.69	2.4	3.41	1.27	0
0	57	2	1	1	0	0	0	30	168	57.3	74	86	0.86	0	0	0	1	1	0	0	20.3	124.5	75	136	3.68	244	5.3	6	20	19	48.36	9.77	1.63	54.5	21	4.55	140.6	5.48	1.29	3.09	1.52	0
1	57	2	1	1	0	0	0	30	182	74.8	86	95	0.9	0	0	0	2	1	0	1	22.58	124.5	76.5	132	5.66	246	6	7.1	18.45	18	45.2	6.94	3.6	79	5.12	5.25	140.1	6.44	1.13	5.43	1.11	0
0	57	2	1	1	0	0	0	30	165	60.8	73	83	0.88	0	0	0	1	1	0	0	22.33	124	70.5	142	5.63	192	5.7	6.1	23	20	47.2	11.59	2.1	71	6.92	3.98	140	4.5	1.74	2.78	1.22	0
1	57	2	1	1	0	0	0	0	152.4	63.3	86	93	0.92	0	0	0	0	1	0	0	27.25	90.5	37	147	6.14	226	5.57	6.6	37	22	47.31	9.41	1.9	103.8	6.21	4.58	137.3	4.79	1.64	3.48	1.02	0
0	57	3	1	1	1	0	0	30	163	65.35	75	83	0.9	0	0	0	2	0	0	0	24.59	124	76	145	6.06	423	5.9	6.3	12	15	41.8	7.9	1.1	56.6	3.71	3.96	136.3	4.6	1.08	2.77	1.47	0
0	57	3	1	1	1	0	0	30	160	64.45	80	90	0.89	0	0	0	1	1	0	0	25.17	129.25	75.5	134	4.77	258	6	6.1	20	22	45.5	6.1	1.7	45.34	5.88	3.97	140.9	5.63	1.64	3.41	1.57	0
1	57	2	1	1	0	0	0	30	166	91.1	92	105.5	0.87	0	0	0	1	0	0	1	33.055	126.75	76.75	146	6.48	160	6.2	6.1	6	18	47.79	13.35	2.4	84.25	7.93	4.07	141.5	5	1.5	3.96	0.89	0
0	57	2	0	1	0	0	0	60	163.5	65.75	80	81	0.985	0	0	0	1	1	0	0	24.605	123.25	74	130	8.64	224	6.2	6.9	13	17	42.8	15.31	3.18	62.8	4.67	4.4	141.4	5.67	1.25	3.33	1.71	0
1	57	3	1	1	0	0	0	40	176	75.4	86	93	0.92	0	0	0	0	1	0	0	24.34	126	80.5	157	4.22	167	5.3	5.8	60	34	45.2	16.39	2.9	88.1	4.68	4.09	141.5	4.25	1.1	3.05	1.03	0
1	57	3	1	1	1	0	1	30	165	67.7	84	93	0.9	0	0	0	2	0	0	0	24.86	122.5	72	159	4.95	102	5.8	5.7	17	12	51.4	14.35	1.83	80	5.63	4.25	138.4	4.64	1.22	3.05	1.17	0
0	57	2	1	1	0	0	0	20	158	61	78	80	0.98	0	0	0	1	1	0	0	24.43	128.5	74.5	131	3.92	192	5.6	6.1	16	18	49.2	11.1	1.48	49.9	4.01	4.47	120	6.68	1.25	4.67	1.6	0
1	57	2	1	1	0	0	0	30	173.2	82	97	104	0.93	0	0	0	1	1	0	0	27.33	127	78.5	148	4.99	236	6.4	6.5	45	25	48	5.5	1.2	54	8.19	3.88	138.9	4.81	4.29	2.52	0.88	0
1	57	2	1	1	0	0	0	20	162	74.8	95	98	0.96	0	0	0	2	1	0	0	28.5	123.5	73.5	151	9.86	217	5.3	5.8	25	15	49	20.6	4.02	77	4.52	4.33	130.3	4.55	2.05	2.21	1.23	0
0	57	2	1	1	0	0	0	20	168	54	67	79	0.84	0	0	0	2	1	0	0	19.13	124	72.5	157	5.57	216	5.4	5.6	23	20.54	51.3	13.15	0.7	47	6.56	4.51	135	6.54	0.64	4.76	1.31	0
1	58	3	1	1	0	0	0	0	165	92	99	97	1.02	0	0	0	0	0	0	0	33.79	121	72.5	148	4.94	235	5.4	5.9	21.15	18	44.8	9.8	1.7	77	4.82	4.42	138.5	4.36	1.25	3.18	0.8	0
1	58	2	1	0	0	0	0	20	175	76	85	90	0.94	0	0	0	2	1	6	0	24.81	121	79	174	6.55	219	5.4	6.3	21.06	13	45.4	16.52	2.35	49	8.53	2.81	143.1	4.73	1.11	2.9	1.41	0
0	58	3	1	1	0	0	0	50	162	71.5	86	94	0.91	0	0	0	1	1	0	0	27.24	126.5	76	141	6.9	219	5.7	6	22	22	45.6	16.18	2.5	57	5.13	3.86	140.5	3.65	1.87	1.34	1.19	0
0	58	3	1	1	0	0	0	0	156	55	90	92	0.97	0	0	0	0	1	0	0	22.6	122.5	73.5	133	7.01	307	5.4	7.2	34	21	46.7	7.95	1.9	50	3.47	4.02	139.6	6.12	2.74	4.34	0.96	0
0	58	2	1	1	0	0	0	30	167	75.1	84	92	0.91	0	0	0	2	1	0	0	26.925	129.5	74.75	132	6.11	212	5.7	5.4	17	23	44.2	8.59	1.63	55.5	5.62	4.19	141.3	4.55	1.97	2.55	1.17	0
0	58	3	1	1	0	0	0	40	158	55.1	76	86	0.88	0	0	0	2	1	0	0	22.07	122	74.5	126	8.7	306	6	6.9	22	20	46.82	14.05	2.67	67.7	5.27	4.5	138.8	5.35	2.02	3.52	1.41	0
0	58	3	1	1	1	0	0	60	167	65.75	87	102	0.85	0	0	0	2	1	0	0	23.57	127.25	76.5	137	5.09	211	5.3	5.6	33	28	51.25	15.1	1.73	66.7	5.16	3.74	141.3	4.09	2.09	1.74	1.28	0
1	58	2	1	1	0	0	0	20	170	78.15	97	104	0.93	0	0	0	1	1	0	1	27.04	129.5	79.25	145	5.37	195	5.3	6.2	19.74	19	47.7	18.82	5.35	77	6.93	4	140.1	4.25	0.77	2.19	1.19	0
0	58	2	0	1	0	0	0	35	162	55	73	84	0.86	0	0	0	2	1	0	0	20.95	119	79	129	5.45	264	5.1	6.1	15	19	47.6	7.58	1.2	62	4.92	4.79	138.7	5.4	0.78	3.46	1.72	0
1	58	2	0	1	0	0	0	20	170	79.8	86	99	0.86	0	0	0	2	1	3	0	27.61	116.5	73.5	155	5.22	138	5.6	5.5	26	22	44.2	17.36	2.35	99.4	6.28	4.71	140.8	5.37	0.59	4.49	0.91	0
1	58	2	1	1	0	0	0	0	170	65	82	90	0.91	0	0	0	0	1	0	0	22.49	120.5	79	134	5.66	182	5.7	6.2	16	21	45.4	5.81	1.17	78	6.45	4.01	130.3	6.08	1.16	4.38	1.21	0
0	58	2	0	1	0	0	0	30	156	51.5	77	86	0.935	0	0	0	1	1	0	0	21.16	124.5	73.5	157	6.29	217	5.8	6.2	26	18	51.4	15.5	0.67	62.6	5.38	3.95	139.9	5.6	2.91	2.35	1.86	0
0	58	3	1	1	0	0	0	30	162	75	85	98	0.86	0	0	0	2	1	0	0	28.57	122	79	114	8.63	213	5.4	6.2	21	22	43.3	7.74	1.7	54	4.84	3.99	140.9	5.61	0.71	3.96	1.54	0
1	58	2	1	1	0	0	0	0	160	58	80	90	0.88	0	0	0	0	1	0	0	22.65	120.5	76	148	5.69	256	5	7.2	11	16	45.6	14.5	3.16	86	5.98	4.47	140	5.37	1.05	3.52	1.49	0
0	58	2	1	1	0	0	0	30	174	77.35	83	92	0.9	0	0	0	2	1	0	0	25.54	124.75	73.5	139	5.94	176	5.5	5.8	24	18	42.5	15.84	1.9	43.9	8.53	3.98	141.7	3.59	0.96	1.78	1.54	0
0	58	3	1	2	0	0	0	40	160	68.25	83	99	0.84	0	0	0	1	1	0	0	26.655	131.25	78	150	4.94	263	5.8	5.9	19	18	49.8	11.38	2.98	64	4.77	4.57	141.3	7.86	5.66	4.08	0.95	0
1	58	3	1	1	0	0	0	30	180	92	106	110	0.96	0	0	0	1	1	0	0	28.39	126.75	79.5	138	6.6	192	5.6	7.3	29	21	47.79	12.5	2.3	100.26	9	4.21	140.6	5.34	2.19	3.95	1.05	0
1	58	2	0	1	0	0	0	50	171	78.8	88	100	0.88	0	0	0	1	1	0	0	26.945	123.25	76.5	149	4.83	261	5.7	6.1	17	18	43.9	14.8	1.99	89.6	3.48	4.29	140.8	4.03	1.09	2.12	1.11	0
1	58	3	1	1	1	0	0	30	180	81	88	98	0.89	0	0	0	2	0	0	0	25	123	74.5	147	4.59	258	5.8	5.9	18	19	47.1	13.82	2.8	84	5.82	4.3	139.5	4.67	0.81	3.67	1.02	0
1	58	2	1	2	1	0	0	30	165	81.8	90	110	0.81	0	0	0	2	0	0	1	30.04	126.5	76.5	126	7.11	162	6	5.4	18	15	43.9	6.3	2.1	94	6.54	4.76	140	5.15	1.06	3.56	1.11	0
0	58	2	1	1	0	0	0	30	154	79.4	90	99	0.91	0	0	0	1	1	0	0	33.47	130.25	77.5	160	6.48	286	5.2	6.4	24	22	44.7	11.31	1.9	42	5.59	4.17	140.2	4.7	2.23	3.53	0.98	0
0	58	2	0	1	0	0	0	30	158	56.7	77	87	0.88	0	0	0	2	1	0	0	22.71	121.5	75.5	129	6.67	229	5.8	6.2	36	30	40.8	11	1.4	55	4.59	4.38	142	4.79	1.1	3.18	1.68	0
0	58	2	1	1	0	0	0	30	158	61.5	79	80	0.985	0	0	0	1	1	0	0	24.63	127.25	76.75	156	5.57	313	6.2	6.3	25	27	46	11.98	1.64	52	5.33	4.39	140	6.09	2.59	3.56	1.09	0
1	58	3	1	1	0	0	0	30	185	77.05	92	95	0.965	0	0	0	2	1	0	1	22.51	124.75	74.25	142	4.78	197	5.4	5.9	38	40	51.2	36.59	8.97	60.4	5.16	4.36	138.6	5.03	1.09	2.67	1.84	0
0	58	3	1	1	0	0	0	20	164	58.85	82	97	0.845	0	0	0	2	1	0	0	21.875	123.75	72.75	120	5.8	245	5.4	5.7	23	27	46.28	14.8	2.31	64.3	3.16	4.4	138.6	5.15	1.31	3.06	1.65	0
0	58	2	1	1	0	0	0	20	160	76.5	80	90	0.89	0	0	0	1	1	0	0	29.875	129	78.75	131	3.15	234	5.4	5.4	23.1	19	51	11.33	1.63	81	4.03	4.55	138.7	7.25	1.35	4.41	1.9	0
1	58	3	1	1	0	0	0	0	170	70	88.2	95	0.92	0	0	0	2	1	0	0	24.22	121	75	151	4.44	212	5.7	5.9	33	17	44.5	9.21	1.2	72	5.65	4.32	142.9	4.74	1.66	3.46	1.02	0
1	58	2	0	0	0	0	0	0	178	79	90	100	0.9	0	0	0	0	1	5	1	24.93	122	74.5	164	5.48	175	5.9	6	17	17	48.4	11	1.3	82	8.12	4.2	139.3	6.77	1.85	4.35	1.51	0
0	58	2	0	1	1	0	0	0	160	57	79	89	0.88	0	0	0	0	0	0	0	22.26	122	74.5	122	7.95	275	5.6	6.4	14	19	44.9	7.42	1.5	75.4	5.19	4.32	140	6.09	0.91	4.36	1.72	0
1	58	2	1	1	0	0	0	30	178.5	84.2	97	112	0.895	0	0	0	1	1	0	0	26.425	124	74.75	150	4.97	191	5.2	5.4	27	24	47.79	26.39	5	87.8	3.22	3.76	136.9	3.79	0.64	2.52	0.85	0
0	58	3	1	1	0	0	0	30	162	60	68	85	0.87	0	0	0	2	1	0	1	22.86	123	74	123	5.2	221	5.9	6.1	12.84	18	47.2	8.6	0.89	45.8	6.41	4.47	141.2	6.35	1.52	4.41	0.95	0
0	58	2	1	1	1	0	0	30	163	68.4	88	105	0.83	0	0	0	1	1	0	0	25.74	121.5	77.5	122	5.8	261	5.4	6.5	18	20	45.1	6.6	1.6	77	5.41	4.32	137.1	6.58	0.77	4.08	1.84	0
0	58	2	1	1	0	0	0	30	158.6	67.1	82	92	0.89	0	0	0	2	1	0	0	26.67	127	74.5	127	7.4	296	5.6	6.5	11	17	50	8.1	1.35	76.18	5.41	4.11	120	5.07	0.99	3.1	1.3	0
1	58	2	0	1	0	0	0	60	179	90	90	100	0.9	0	0	0	2	1	5	0	28.08	127.5	71	155	5.71	246	5.8	5.9	20	18	47.2	10.11	1.5	81	5.65	4.32	139	4.2	1.57	2.98	0.71	0
0	58	2	1	1	0	0	0	30	156.5	57.6	80	92	0.865	0	0	0	2	1	0	0	23.515	123	72.5	124	6.17	239	6.4	6.5	35	24	44	5.59	1.1	74.48	7.69	4.55	140.4	6.17	2.06	3.91	1.51	0
0	58	3	1	1	0	0	0	50	164	75.9	86	101	0.85	0	0	0	1	1	0	0	28.215	127.5	75.25	131	5.7	259	6.2	6.2	16	20	48.3	16.4	3.58	54.5	5.16	4.17	139.1	3.76	2.66	1.84	0.97	0
0	58	2	1	1	1	0	0	30	168	67.7	80	96	0.83	0	0	0	2	0	0	0	23.98	122	73	116	5.54	177	5.4	5.5	16	20	44.6	11.15	1.76	62	5.5	4.42	141.4	6.11	1.1	4.12	1.81	0
0	58	2	1	1	1	0	0	0	155	60	89	97.5	0.89	0	0	0	0	0	0	0	24.97	121	75.25	138	6.41	261	5.4	6.9	12	15	46.1	9.4	2.1	55.7	5.05	4.24	138.9	4.3	1.21	2.82	1.3	0
1	58	3	0	1	0	0	1	30	183	79.9	92	106	0.86	0	0	0	2	1	0	1	23.855	131.5	73.25	159	6.32	232	5.6	5.4	25	20	46.6	15.8	2.17	79	6.25	4.14	135	5.53	2.02	3.65	0.97	0
1	58	2	1	1	0	0	0	30	169	75	86	98	0.87	0	0	0	2	1	0	0	26.25	123.5	71.5	157	5.99	248	5.7	6.3	20	14	49.7	16.4	3.4	58	4.9	4.71	137.8	3.71	0.83	1.93	1.62	0
0	58	2	1	1	0	0	0	20	165	67.7	83	94	0.88	0	0	0	1	1	0	0	24.865	125.75	71	136	5.29	158	6.1	6	35	35	52.2	12.8	0.8	49.9	6.02	4.23	137.4	5.8	1.63	3.97	1.43	0
1	58	2	1	1	0	0	0	50	173	72.6	80	94	0.85	0	0	0	1	1	0	0	24.25	138	83.25	174	5.39	224	5.6	5.7	86	55	49.8	14.85	2.47	57.4	4.3	3.69	139.4	3.29	1.44	1.4	1.16	0
1	58	2	0	1	0	0	0	35	165	61	82	98	0.83	0	0	0	2	1	0	0	22.4	127.5	71	156	4.77	264	5.5	6.4	19	22	46.2	12.94	1.3	70.9	4.83	4.3	138.2	5.4	1.05	3.6	1.75	0
1	58	2	1	1	0	0	0	40	174	82.9	90	103	0.87	0	0	0	2	1	5	1	27.38	128	75	153	5.08	176	5.3	6.2	24	22	45.5	27.5	6.61	91	3.78	3.94	138.2	2.8	1.61	1.19	0.95	0
1	58	3	1	1	0	0	0	0	177	71.7	76	92	0.82	0	0	0	0	1	0	0	22.88	125	76	131	6.21	301	5.1	6.6	12	20	44.5	6.41	1.5	145	8.31	4.32	139.5	6.07	1.96	3.39	1.17	0
0	58	2	1	0	0	0	0	60	160	70.4	88	98	0.895	0	0	0	2	1	0	0	27.495	120.5	74	134	6.67	245	5.3	5.9	25	26	49.7	6.34	1.1	54.62	6.75	4.21	138.4	6.01	2.4	3.15	1.68	0
1	58	2	1	1	0	0	0	30	170	79	87	102	0.85	0	0	0	2	1	0	0	27.33	136	80.5	154	4.35	251	6.2	6.3	16	18	49.1	9.58	1.8	82	5.03	4.54	125.9	5.94	0.47	4.39	1.18	0
0	58	2	1	1	0	0	0	30	165	70.5	87	98	0.89	0	0	0	2	1	0	0	25.89	128.75	76.75	133	6.49	183	5.1	6.7	10	18	46.2	11.64	2	67.5	3.89	4.81	138.2	5.19	1.04	3.69	1.55	0
1	58	2	0	1	0	0	0	60	160	75.7	86	97	0.885	0	0	0	1	1	2.5	0	29.565	123	74	141	6.32	227	6	6	14	16	46.5	6.32	2.1	91	7.88	3.67	135.5	4.83	3.08	2.37	0.99	0
1	58	2	0	1	0	0	0	0	172	74	80	94.5	0.88	0	0	0	0	1	0	0	25.01	123.75	86.75	161	6.15	213	5.6	5.5	12	17	47.4	10.7	1.74	103.8	5.17	4.2	137	6.91	2.68	4.25	1.44	0
1	58	3	1	1	0	0	0	0	165	96	106	117	0.965	0	0	0	1	1	0	0	35.26	126.5	73.5	151	6.8	229	5.7	6.4	28	19.11	44.37	10.34	2.1	65.7	3.39	3.65	138	5.64	1.01	4.21	0.76	0
1	58	2	1	1	0	0	0	30	170	75.3	87	99	0.9	0	0	0	2	1	0	0	26.05	124.75	72	143	4.99	311	5.7	7.2	54	44	44.8	14	2.25	88.58	3.67	4.28	143	6.7	1.49	4.78	1.25	0
0	58	3	0	1	0	0	0	30	155	65	76	88	0.86	0	0	0	2	1	0	0	27.05	121.5	77	145	4.83	265	5.3	5.8	35	38.18	46.3	12.52	2.6	46.51	4.66	4.07	141.7	4.27	1.58	2.84	1.2	0
1	58	2	1	1	1	0	0	0	170	80.35	90	120	0.75	0	0	0	1	1	0	0	27.795	111.75	77.75	133	5.39	250	5.7	5.4	21	20	43.8	12.24	4.59	52.2	6.17	4.19	140	4.95	1.19	3.01	1.28	0
0	58	3	1	1	0	0	0	30	156	53	82	93	0.88	0	0	0	2	1	0	0	21.77	124	79	150	7.16	285	5.6	6.3	20	21	47.31	7.41	1.49	64	5.31	4.32	139	5.64	0.69	3.7	1.64	0
1	58	2	1	1	0	0	0	0	174.6	78.9	96	99	1.09	0	0	0	0	1	40	0	25.88	129	75	152	7.33	197	5.17	6.1	19	18	45	17.09	3.1	83.3	5.64	4.46	138.5	6.17	1.1	4.15	1.3	0
0	58	3	1	1	0	0	0	30	160	56.7	76	88	0.86	0	0	0	1	1	0	0	22.14	126	74	127	6.88	196	6	6.6	12	17	46.4	11.1	2.19	60.05	4.28	4.11	138.4	4.93	1.95	3.26	1.08	0
0	58	2	0	1	0	0	0	50	160	74.3	84	108.5	0.93	0	0	0	1	1	0	0	29.02	127	76.75	138	7.75	78	5.6	6.1	21.56	23	49.2	16.4	3.5	51.4	8.19	4.61	140.3	4.08	1.17	1.71	1.53	0
0	58	2	1	1	0	0	0	40	159	61	78	87	0.9	0	0	0	1	1	0	0	24.12	129	78	136	6.73	302	5.3	6.3	16.94	23.58	50.1	10.2	1.4	51.74	5.02	3.88	139.6	5.82	1.59	3.99	1.37	0
1	58	2	1	1	0	0	0	40	163	71.7	76	88	0.86	0	0	0	2	0	0	0	26.98	125	76	144	7.43	198	5.2	5.9	28.58	28	47.24	18.09	4.9	75	4.66	4.32	137.7	4.54	1.92	2.32	1.33	0
0	58	2	1	2	0	0	0	0	165	62.2	80	90	0.88	0	0	0	0	1	0	0	22.84	125	74	117	5.21	190	5.3	6.1	21	23	47.34	14.15	2.5	70.8	6.66	4.65	140.1	3.84	1.29	1.61	1.82	0
1	58	3	1	1	1	0	0	30	170	70.15	81	90	0.9	0	0	0	2	0	2.5	0	24.265	124.5	76	146	6.06	162	5.7	6.4	17	18	44.7	12.3	2.2	71	5.33	3.73	137.5	4.42	2.47	2	1.42	0
0	58	2	1	1	0	0	0	30	165	67.35	86	94	0.91	0	0	0	2	1	0	0	24.735	125	72.75	139	4.43	324	5.6	5.5	20	17	44.9	16.83	1.5	41	5.49	4.22	136.9	5.62	1.89	3.24	1.56	0
1	58	2	1	1	0	0	0	30	167.8	74.4	85	90	0.94	0	0	0	0	1	0	0	26.42	127.25	73.5	147	4.62	222	6.61	7.7	47	25	47.2	12.2	1.78	75	3.91	4.33	139.9	3.55	2.19	2.12	0.92	0
1	58	2	1	1	0	0	0	40	170	67.5	84	90	0.93	0	0	0	1	1	0	0	23.35	136	75	135	6.68	190	7.47	6.5	34	28	44.7	10.36	1.81	90	5.97	3.91	139	4.1	2.23	2.22	1.1	0
0	58	2	0	1	0	0	0	30	160	65	80	95	0.84	0	0	0	2	1	0	0	25.39	122.5	74.5	137	7.35	254	5.3	5.6	20	19.02	44.8	7.9	0.7	69.1	3.95	3.73	141.2	4.46	0.65	2.91	1.34	0
0	58	2	0	1	0	0	0	60	158	60.4	82	93	0.88	0	0	0	2	1	0	0	24.19	121.75	76	135	7.24	251	6.5	6.5	21	31.53	47.5	9.66	3	62	4	3.93	139.9	7.69	2.26	5.28	1.68	0
1	58	2	1	1	0	0	0	30	170.5	69.95	92	100	0.92	0	0	0	1	1	0	0	23.95	94.5	56.75	137	4.96	292	5.7	7.7	31	21	46.2	9.46	2	70.8	5.3	3.85	129	3.79	1.61	1.61	1.63	0
1	58	2	0	0	0	0	0	30	158	74.8	84	101	0.83	0	0	0	1	1	0	0	29.96	123	74	144	6.2	196	5.6	7.4	14	16	46.1	8.3	1.89	90.3	6.53	3.63	140.4	5.45	0.84	4.06	1.2	0
0	58	2	1	1	0	0	0	30	168	62.65	83	98	0.85	0	0	0	1	1	0	0	22.195	130	76.75	134	5.15	306	5.7	6.2	31	20	46.3	6.5	1.1	48	6.48	4.39	140.4	4.41	1.58	2.25	1.23	0
0	58	2	1	1	0	0	0	30	166	67	90	100	0.82	0	0	0	1	1	0	0	24.31	122.5	78	142	7.27	285	6	6.3	25	21	45.6	12.9	1.86	52	6.19	4.58	139.7	4.55	2.1	2.63	1.1	0
1	58	2	1	1	0	0	0	40	155.5	60.8	82	92	0.89	0	0	0	2	1	0	0	25.135	125.5	72.5	157	5.59	220	5.3	5.5	22	21	51.3	19.03	2.9	57.4	16	4.98	138.2	3.67	0.99	2.5	1.22	0
1	58	2	1	1	0	0	0	30	173	90	103	113	0.91	0	0	0	2	1	5	1	30.07	125.5	70.5	155	6.05	192	5.2	6.3	43	25	46.9	12.4	1.85	115	6.61	4.86	142.4	3.41	1.14	2.07	1.07	0
0	58	3	0	1	1	0	0	10	163.5	63.65	83	90	0.94	0	0	0	1	1	0	0	23.805	125.75	78.25	138	5.53	179	5.9	5.6	14	17	43.4	10.11	1.3	65	6.17	2.81	144.1	4.92	1.35	2.87	1.19	0
0	58	2	1	1	0	0	0	0	158	52.8	72	89	0.8	0	0	0	0	1	0	0	21.15	126	75	137	7.12	352	5.7	6.2	52	47	48.4	9.1	2.24	67.7	5.59	4.46	140	6.42	6.05	3.17	1.01	0
0	58	2	1	1	0	0	0	30	160	62.8	70	75	0.93	0	0	0	2	1	0	0	24.53	122.5	75.5	134	5.94	180	5.2	6.1	16.89	23	46.1	18.68	2.35	70	6.79	4.87	139.02	5.82	1.28	3.13	2.43	0
0	58	2	1	1	1	0	0	40	170	65.9	71	80	0.885	0	0	0	2	0	0	0	22.795	128.25	77	138	7.43	182	6.5	6.2	8	16	45.33	15.74	1.97	63	5.42	4.11	140.4	4.33	1.22	2.41	1.6	0
0	58	3	1	1	1	0	0	30	163	59.4	80	80	1	0	0	0	2	0	0	0	22.35	113	68.5	133	6.97	243	5.1	6.3	18	25	51.4	10.23	1.3	42	6.01	4.15	138.4	5.64	1.38	3.48	1.54	0
1	58	3	1	1	0	0	0	60	178	90.1	90	103.5	0.88	0	0	0	1	1	0	0	28.43	132.25	76	146	6.08	191	5.7	7.4	40	27	47.6	6.1	1.3	121.4	3.09	4.72	140.2	5.17	2.33	3.31	0.87	0
0	58	3	1	1	0	0	0	45	160	50.7	73	82	0.89	0	0	0	1	0	0	0	19.8	130.5	75	130	4.73	245	5.3	6	15	17	48.8	7.7	1.3	54.4	5	4.06	138	4.28	1.25	2.13	1.46	0
1	58	2	1	1	0	0	0	30	170	91.55	100	96	1.04	0	0	0	1	0	5	1	31.675	123.5	73	142	7.16	127	6	6.6	21.06	36	48	10.9	2.58	70	4.52	4	139.1	3.92	1.86	1.63	0.98	0
0	58	2	1	1	0	0	0	30	165	77.8	78	94	0.82	0	0	0	2	1	0	0	28.57	121	76.5	122	6	178	6	5.9	13	13.85	46.4	6.2	0.91	48	8.59	4.07	140.4	6.75	2.79	3.9	1.51	0
1	58	3	0	1	0	0	0	30	180	73	82	99	0.89	0	0	0	2	1	0	0	22.53	131	72	102	7.03	319	5.2	5.6	17	31	43.5	4.86	1.4	74	5.41	4.56	134.5	5.68	0.67	4.22	1.34	0
1	58	3	1	1	0	0	0	20	170	74.8	88	92	0.95	0	0	0	2	1	0	0	25.88	125	73.5	162	4.08	257	5.7	5.5	32	24	46.2	8.33	1.4	76	3.28	2.81	139	5.36	2.22	3.64	1.13	0
1	58	3	0	1	0	0	0	30	178	70	83	94	0.88	0	0	0	2	1	0	0	22.09	123.5	77.5	158	7.58	225	5.7	5.8	14	24	51.3	14.1	1.37	79.3	4.32	4.76	133.1	6.14	0.97	4.16	1.6	0
1	58	2	1	1	0	0	0	40	169	73.7	79	91	0.87	0	0	0	2	1	0	0	25.8	125	75	149	8.34	199	5.6	6.1	28	24	48	12.9	2.68	95	6.08	4.45	139.4	7.83	1.04	5.58	1.86	0
1	58	3	0	1	0	0	0	30	180	86.3	98	103	0.95	0	0	0	1	1	0	0	26.63	122.5	73.5	134	8.08	195	5.6	5.8	23	23	46.3	10.4	3.28	94.3	6.07	4.26	139.4	4.87	2.58	2.62	1.16	0
0	58	2	1	1	0	0	0	30	150	46	69	88	0.78	0	0	0	2	1	0	0	20.44	124.5	76.5	132	9.28	285	5.8	6.4	12	16	43.9	9.7	2.9	53.8	5.58	4.69	140.4	5.47	1.23	3.93	1.93	0
0	58	3	1	1	0	0	0	30	152	58.1	79	95	0.83	0	0	0	2	1	0	0	25.14	124.5	74	140	6.78	342	5.6	6.5	28	22.78	44.5	6.53	1.1	59	3.98	4.09	138.6	7.39	2.39	4.5	1.69	0
0	58	2	1	1	0	0	1	30	150	51.25	82	96	0.93	0	0	0	1	1	0	0	22.77	124.25	76.75	141	5.7	270	6.2	6.2	37	17	47.3	7.99	1.63	47.4	7.66	4.32	138.2	4.52	1.77	2.77	1.47	0
0	58	3	1	1	1	0	0	30	158	60.2	79	99	0.79	0	0	0	2	0	0	0	24.11	123.5	76.5	148	5.74	306	5.7	5.7	25	26	50.1	9	1.2	72	4.25	3.48	139.4	5.5	2.58	3.21	1.15	0
0	58	3	0	1	0	0	0	30	168	80	86	94	0.91	0	0	0	2	1	0	0	28.34	120.5	72.5	143	5.81	253	5.7	6.6	19	23	42.8	11.66	2.23	60.3	3.5	3.98	142.4	5.69	2.05	3.77	1.17	0
0	58	3	1	1	0	0	0	0	152	65	78	96	0.92	0	0	0	1	0	0	0	28.13	128.5	77.5	118	4.55	176	5.4	6	21.33	25	44.5	11.3	2.83	46	7.07	4.03	141.6	4.75	2.84	2.48	1.01	0
0	58	2	1	1	0	0	0	30	163	70	85	90	0.94	0	0	0	2	1	0	0	26.34	130.5	81.5	135	7.25	215	5.3	5.9	21	27	43.6	11.47	3	70	4.33	4.19	137.5	6.68	1.68	4.4	1.48	0
0	58	2	1	1	0	0	0	60	165	68	83	120	0.69	0	0	0	2	0	0	0	24.97	127	69.5	136	5.93	182	5.8	5.4	28	17.5	49.8	8.41	1.39	62	3.92	4.4	139.8	5.23	0.58	3.46	1.56	0
1	58	3	1	1	0	0	0	30	180	94.9	105	112	0.91	0	0	0	1	0	20	0	31.06	127	76.25	152	8.08	271	6.1	6.1	16	17	47.2	11.14	1.97	76	5.83	4.27	125.9	3.37	0.45	1.71	1.04	0
1	58	3	1	1	0	0	0	40	175	61.6	82	96	0.85	0	0	0	1	1	0	0	20.11	124.75	72	141	6.98	342	6.2	6.9	26	19	49.7	12.9	0.7	93.4	7.13	4.28	139.3	5.27	0.67	3.69	1.13	0
1	58	2	0	1	0	0	0	30	170	65	85	98	0.87	0	0	0	2	1	10	1	22.49	129	83	169	6.61	266	5.6	6.2	66	23	48.2	6.63	1.1	60.1	4.66	4.2	141.3	4.61	1.67	3.41	1.03	0
1	58	2	1	0	0	0	0	30	170	85.2	88	74	1.18	0	0	0	1	1	0	0	29.48	123	75.5	161	4.47	246	6	6.7	48.1	32	47.5	29.07	6.48	74.1	6.32	4.54	138.3	3.7	1.85	2.17	1.58	0
0	58	3	1	1	1	0	0	0	160	64.8	90	98	0.91	0	0	0	2	0	0	0	25.31	131	76.5	143	7.7	248	5.3	6.1	13	18	46.1	9.74	2	45.4	6.19	3.65	142.9	3.86	2.18	1.93	1.26	0
1	58	2	1	1	0	0	1	20	175	68	81	88	0.92	0	0	0	1	1	1.5	1	22.2	125.25	74.75	163	6.7	201	5.7	5.6	20	18	41.8	19.5	4.61	95.72	5.24	4.23	141.7	5.78	2.39	3.44	1.33	0
1	58	2	0	1	0	0	0	30	170	60.95	76	85	0.88	0	0	0	1	1	0	0	21.085	123	77	137	11.7	235	5.8	6.6	13	18	45.6	10.4	2.39	100.26	7.08	4.13	136.9	6.98	2.41	4.02	1.37	0
1	58	2	1	1	1	0	0	30	168	72.8	80	100	0.8	0	0	0	2	0	3	1	25.79	123.5	75.5	152	4.24	241	5.7	6.3	19	16	51.4	10.1	2.49	80.2	5.29	4.84	140	4.37	1.31	2.97	1.33	0
1	58	2	1	1	1	0	0	20	174	93	110	118	0.91	0	0	0	1	0	0	0	30.71	127	74.75	152	6.73	142	6.1	6.5	16	17	44.73	10.5	2.9	79.1	6.07	4.46	135.9	5.74	4.85	2	1.02	0
0	58	3	1	1	0	0	0	0	163	62.8	76	83	0.92	0	0	0	0	1	0	0	23.63	126	76.5	135	6.55	245	5.4	6.2	22	16	45.6	9.55	1.8	58	3.89	4.07	139.7	5.1	2.15	3.33	1.38	0
1	58	2	0	1	0	0	0	20	173	80	92	100	0.92	0	0	0	2	1	0	0	26.72	122.5	73.5	156	6.86	244	5.7	5.7	41	33	42.8	11.21	3.08	53.8	5.6	4.58	136.9	4.14	1.66	2.46	1.11	0
0	58	3	0	1	0	0	0	30	164	55.7	75	82	0.91	0	0	0	1	1	0	0	23.79	126	76	134	7.15	225	6.1	5.4	7	17	51.3	11.37	1.63	63	4.17	5.93	139.7	7.04	2.83	4.21	1.54	0
1	58	3	1	1	1	0	0	30	174	78.2	94	104	0.9	0	0	0	2	0	0	0	25.825	124	75.5	142	7.87	299	5.3	6	8	16	45.2	10.5	2.2	92	5.7	4.41	137.7	3.51	1.48	2.77	0.74	0
0	58	2	1	1	0	0	0	30	156	80	86	105	0.82	0	0	0	1	1	2	0	32.87	127	75.5	155	5.12	151	5.4	5.5	24.48	20	47	11.5	1.56	57	5.16	4.47	140.6	4.21	0.88	2.87	1.26	0
0	58	3	1	1	0	0	0	40	161	65.3	88	98	0.89	0	0	0	2	1	0	0	25.19	123	74	129	6.05	220	5.9	6.5	27	21.16	49	12.04	1.1	64	8.2	5.06	139.9	7.02	1.01	5.14	1.33	0
1	58	2	1	1	0	0	0	0	174	77.8	84	100	0.84	0	0	0	2	1	0	2	25.69	130	76.5	156	5.23	172	6	6.4	22	22.38	49	14.8	2.1	91.1	5.47	4.32	140.4	5.83	1.5	3.9	1.21	0
0	58	2	1	1	0	0	0	30	170	63.2	77	96	0.9	0	0	0	1	1	0	0	21.86	122	75.5	144	6.43	295	6.4	6.5	19	21	48.4	6.7	1.3	70.9	4.27	4.12	139.7	5.15	2.31	3	1.3	0
1	58	2	1	1	1	0	0	30	167	81	90	100	0.9	0	0	0	2	0	0	0	29.04	122	74.5	153	5.6	187	5.7	7.2	19.83	20	46.3	12.84	3.18	103	5.38	4.2	138.6	6.4	2.32	4.97	0.82	0
1	58	3	1	1	0	0	0	30	175	77.8	82	96	0.85	0	0	0	2	1	6	2	25.4	122.5	73.5	164	6.98	200	5.3	5.5	24	16	45.6	8.6	2.78	91.8	8.09	3.89	142.4	4.42	1.4	2.43	1.21	0
1	58	2	1	1	0	0	0	0	170	63.4	87	95	0.915	0	0	0	1	1	0	0	23.42	123.5	74.25	137	6.49	147	6.1	6	20.73	23	42.1	12.2	2.07	70.7	9.05	4.35	138.5	6.11	1.28	2.81	2.05	0
1	58	3	1	1	0	0	1	20	165	66.6	86	90	0.96	0	0	0	1	1	0	0	24.46	129	75	154	4.27	169	6.2	6.1	28	23	43.9	19.1	2.1	78.7	4.18	3.53	138.6	4.07	2.1	2.49	0.96	0
0	58	3	1	1	1	0	0	50	174	81.4	85	97	0.875	0	0	0	1	1	0	0	26.88	125.5	74.25	129	4.93	203	6	6.4	36	27.29	48.07	5.36	1.2	65.3	6.54	3.99	140.6	5.53	2.53	3.09	1.36	0
1	58	2	1	1	0	0	0	20	178	70.45	85	95	0.89	0	0	0	1	1	0	0	22.23	128	74.5	139	4.49	219	6.3	6	20	18	47.31	13.8	1.4	99	5.21	4.07	138.6	4.38	1.03	2.56	1.24	0
1	58	3	1	1	0	0	0	30	173	72.65	88.5	99	0.895	0	0	0	1	1	0	0	24.27	130.5	82	162	6.72	208	5.6	5.9	29	22	48.4	12.93	2.19	73	6.07	4.01	138.2	6.11	1.63	4.07	1.32	0
0	58	2	1	1	0	0	0	0	158	50.9	68	85	0.8	0	0	0	0	1	0	0	20.38	124.5	77.5	130	8.34	325	5.6	5.5	14	15	50.6	7.58	1.43	82.6	6.07	4.62	139	5.07	2.27	2.68	1.48	0
1	58	3	1	1	0	0	0	0	170	64	90	105	0.85	0	0	0	0	1	0	0	22.14	149.5	90.5	155	5.06	327	5.3	6	45	35	41.8	8.5	1.6	78.59	5.77	3.67	139.4	4.81	1.07	3.2	1.09	0
0	58	2	1	1	0	0	0	30	160	70	88	107.5	0.82	0	0	0	2	1	0	0	27.185	133.25	76.25	125	6.31	304	5.9	6.1	15	22	49.8	6.6	1.3	81	4.95	4.16	135.8	6.2	2.75	4.32	1.13	0
1	58	2	1	1	0	0	0	0	170	64	80	90	0.88	0	0	0	0	1	0	1	22.14	119	79	158	3.96	198	5.3	6.5	21	23	49.1	14.2	5.06	87	8.29	4.01	138.8	5.07	2.11	2.79	1.3	0
1	58	2	1	1	0	0	0	35	170	72	82	95	0.86	0	0	0	2	1	0	0	24.91	132	77.5	174	4.38	186	5.2	5.9	35	24	44.7	26.38	7.57	78.3	4.46	4.05	140.1	3.26	1.68	1.52	0.99	0
0	58	2	1	1	0	0	0	30	161	61.9	81	90	0.9	0	0	0	2	0	0	0	23.88	121	74	127	4.56	210	5.8	6.3	17	20	44.8	17.73	2.4	36.6	5.45	4.38	138.7	7.01	1.33	4.62	1.95	0
0	58	2	1	2	1	0	0	30	164	50	80	87	0.93	0	0	0	1	1	0	0	18.59	125	70.5	141	8.69	284	5.1	5.4	20	23	47.2	7.53	1.7	73	3.8	4.81	139.5	3.73	1.48	1.87	1.39	0
1	58	3	1	1	0	0	0	30	170	60.75	86	92	0.93	0	0	0	1	1	0	0	21.015	123.75	74	157	6.67	253	5.7	6.3	16.74	20	41.8	17.41	2.1	45	5.82	3.86	138.7	6.04	0.79	4.26	1.38	0
0	58	2	1	1	1	0	0	0	160	61.65	78	86	0.9	0	0	0	0	0	3.5	0	24.075	126.5	74.75	150	8.35	234	5.9	7.5	59	31	49	18.82	2.4	63.1	4.36	3.94	143	4.82	1.26	2.97	1.68	1
1	58	3	0	1	0	0	0	0	175	70.2	80	96	0.83	0	0	0	0	1	0	0	22.92	126.5	73.5	142	4.49	176	5.3	5.8	12	14	44	8.4	1.8	77.4	5.58	4.32	138.2	3.88	0.84	2.34	1.06	0
0	58	3	1	0	0	0	1	20	160	65.7	72	87	0.82	0	0	0	1	1	0	0	25.66	129.5	72.5	152	3.53	219	5.97	6.6	33	25	47.9	9.38	1.33	58.2	3.37	3.72	139.1	6.13	1.25	4.94	1.05	0
1	58	2	1	1	0	0	0	30	168	88.5	101	107.5	0.915	0	0	0	1	1	0	0	26.855	133.75	84.75	148	8.84	310	6.6	8.6	37	26.2	47	11.7	4.11	79.7	9.3	3.69	137.5	5.14	3.17	1.86	1.29	0
0	58	3	1	1	1	0	0	30	164	65.65	84.5	99	0.855	0	0	0	1	1	0	0	24.405	132.25	76	134	6.07	255	5.9	6.2	14.34	19	46.2	15.11	1.9	46	5.46	3.95	143.6	4.39	0.73	2.85	1.38	0
1	58	2	0	1	0	0	0	30	174	64.95	90	100	0.9	0	0	0	1	1	0	0	21.445	124.25	75	147	7	271	5.7	5.9	18	13	45.2	7.3	2.39	60.3	5.26	4.38	140.4	4.38	0.84	2.85	1.25	0
0	58	2	1	1	0	0	0	30	162	50.5	77	84	0.92	0	0	0	1	1	0	0	19.24	122	73	144	5.97	264	5.6	6.4	5	17	48.4	9.3	1.7	77.3	4.56	4.2	138.6	5.06	0.94	3.36	1.52	0
0	58	3	1	1	0	0	0	30	155	62.6	80	94	0.86	0	0	0	2	1	0	0	26.05	125	76.5	120	7.14	286	5.1	5.3	17	18	44.4	4.85	1.4	61.3	6.01	4.86	139.7	5.76	1.45	3.6	1.5	0
1	58	3	1	1	0	0	0	60	176	73.9	90	95	0.945	0	0	0	1	1	0	0	23.85	125	77	151	7.1	218	5.6	6.5	22	27	47.9	22.08	4.72	83	5.13	4.57	139.4	5.44	2.45	3.5	1.11	0
1	58	3	1	1	0	0	0	20	170	84.35	90	93	0.97	0	0	0	1	1	0	0	29.18	126.75	74.75	137	6.75	289	6	6.5	34	25	46.72	11.6	2.7	109	9.03	4.24	140.5	4.96	1.69	2.6	1.3	0
0	58	3	1	1	0	0	0	30	158	51.5	70	94	0.74	0	0	0	2	1	0	1	20.62	120.5	73.5	149	5.68	391	5.6	5.4	19	23	49.7	6.27	1.8	62.2	3.17	4	141.7	5.53	1.25	3.78	1.25	0
1	58	3	1	1	1	0	0	30	178	89.75	90	97	0.93	0	0	0	1	1	0	1	28.32	122	73	148	4.61	219	6.1	5.8	26	25	44.8	20.31	2.35	71.36	3.8	3.94	139.3	5.09	1.14	3.13	1.04	0
1	58	2	1	1	0	0	0	30	175	72.05	81	88	0.92	0	0	0	1	1	0	1	23.52	125	76.5	144	7.42	319	5.7	5.9	25	16.35	47.7	7.7	1.4	74.7	6.78	4.33	139.9	5.13	0.9	3.81	0.94	0
0	58	3	1	1	0	0	0	30	165	61.45	77	93	0.83	0	0	0	1	1	0	0	20.23	125	73	128	3.85	183	6.2	7	16	18.46	42	11.84	1.3	70.5	6.11	3.73	140.3	6.45	3.24	4	0.97	0
1	58	2	1	1	0	0	0	30	170	72.8	84	95	0.88	0	0	0	1	1	7	1	25.185	125.5	76.25	149	7.58	196	5.3	6	12	11	45.9	8.86	1.57	74	4.52	4.23	137.7	7.09	1.14	1.8	4.43	0
1	58	2	0	1	0	0	0	30	170	67.6	80	95	0.87	0	0	0	1	1	5	1	23.385	124.75	77.5	158	5.19	188	5.8	6.2	23	27.07	47.7	17.81	4.9	79	5.38	4.29	143.2	3.14	1.38	1.54	1.39	0
0	58	2	0	0	1	0	1	60	156	56.65	80	90	0.88	0	0	0	1	1	0	0	23.27	128	73	135	5.66	214	6.2	6.9	49	32	42	13.3	1.7	48	7.58	4.34	139	4.44	1	2	1.66	0
1	58	3	1	1	1	0	0	30	172	72	80	100	0.8	0	0	0	2	0	0	1	24.33	122.5	73	346	4	142	5.1	6.8	49	19	51.3	15.38	2.19	48.2	6.56	3.94	142.4	3.16	1.42	1.81	1	0
1	58	3	1	1	0	0	0	0	186	97.1	100	110	0.9	0	0	0	0	1	0	0	28.84	123	71.5	148	4.61	204	5.7	7.2	46	29	46.6	12.49	2.42	89.61	7.62	4.23	140.1	3.04	1.36	2.15	0.72	0
0	58	2	1	1	0	0	0	30	148	48.35	82	89	0.92	0	0	0	1	1	0	0	22.07	128.5	77	138	4.91	156	5.4	6.2	18	18	42.3	8.79	1	48	6.63	4.11	137.7	7.32	1.76	4.55	1.7	0
0	58	3	1	1	0	0	0	30	155	70.2	80	92	0.86	0	0	0	1	1	0	0	29.21	133.5	81	151	10.69	328	6.6	6.6	31	17.56	48.36	9.69	1.3	69.59	6.02	4.06	138.4	6.7	2.98	4.79	0.99	0
1	58	2	1	1	0	0	0	60	171	93	103	110	0.91	0	0	0	2	1	0	0	31.8	124.5	77	170	3.92	222	5.7	6.8	49	31	48.4	16.18	2.28	48	3.79	3.73	136.3	3.4	1.52	2.01	0.78	0
0	58	2	1	1	0	0	0	30	155	58.95	80	90	0.89	0	0	0	2	1	0	0	24.53	124.5	75	140	4.44	266	5.5	5.7	12	17	49.8	15	1.4	59	5.36	4.33	141.9	6.62	1.22	4.94	1.07	0
1	58	3	0	1	0	0	0	0	170	64	76	88	0.86	0	0	0	0	1	5	0	22.14	124	75.5	149	5.69	191	5.8	6.4	12	23	48	16.31	4.11	140	8.02	4.74	139.5	4.97	2.37	2.96	1.25	0
0	58	2	1	1	1	0	0	30	160	61.45	80	95	0.84	0	0	0	1	1	0	0	23.995	124.5	78.75	145	5.44	325	5.7	6.5	20	23	46.5	21.93	4.3	69	3.04	4.19	141.7	4.25	1.46	2.18	1.43	0
1	58	2	1	1	0	0	0	30	170	72.75	85	88	0.97	0	0	0	1	1	15	1	25.17	124.5	74.5	148	4.19	171	5.5	5.8	13	14	43.5	7.5	0.7	94	5.01	4.27	140.8	4.69	0.96	3.46	1.05	0
1	58	2	1	1	0	0	0	30	168	75	80	90	0.88	0	0	0	2	1	0	0	26.57	125.5	75	145	5.83	246	5.7	5.6	31.56	19	43	15.34	3.6	72	5.67	4.4	133.4	3.9	1.5	2	1.12	0
0	58	3	1	2	0	0	0	30	170	61.85	82	90	0.89	0	0	0	2	1	0	0	21.395	124	73.25	131	5.59	276	5.6	5.9	16	21	45.9	16.38	3.28	59	4.93	4.12	140.6	6.16	1.65	3.65	1.96	0
1	58	2	1	1	0	0	1	0	174	75.95	103	105	0.93	0	0	0	2	1	10	1	25.085	122.25	74	155	7.57	158	6	6.2	103	39	44.7	15.1	2.6	68	5.36	4.22	138.9	3.11	1.81	1.11	1.12	0
0	58	2	0	1	0	0	0	40	154	55.9	76	91	0.84	0	0	0	1	1	0	0	23.565	123	75.5	119	8.69	349	5.6	6.4	17	25	45	5.5	3.07	61.26	6.86	4.14	141.3	6.05	0.91	3.88	1.72	0
0	59	2	1	1	0	0	1	120	150	66	85.5	93	0.855	0	0	0	1	1	0	0	29.33	129.75	76.5	134	7.58	280	5.2	5.8	14	14	43.2	6.06	1.4	56.4	6.17	4.4	139	4.4	0.8	2.94	0.7	0
1	59	3	1	1	0	0	0	30	180	79.85	86	100	0.86	0	0	0	1	1	0	0	24.64	125.5	75.5	158	9.27	164	5.5	5.6	34	26	41.8	11.31	2.8	57.3	4.43	3.76	142.12	5.15	1.14	3.2	1.48	0
0	59	2	1	1	0	0	0	0	162	69.8	84	96	0.87	0	0	0	0	1	0	0	26.59	121	73.5	137	5.38	316	5.3	5.8	11	18.33	45.7	22.85	4.61	72.9	4.86	3.57	136.7	6.79	1.41	4.33	1.87	0
0	59	2	1	1	0	0	0	40	160	55.5	75	97.5	0.77	0	0	0	2	1	0	0	21.675	131.25	76	134	7.21	338	5.2	5.4	23	18	46.9	6.99	1.2	52.9	4.48	3.66	140.4	5.23	1.44	2.72	1.69	0
0	59	2	1	1	0	0	0	60	163	60.7	83	97	0.86	0	0	0	2	1	0	0	22.845	123.75	75	141	6.05	204	5.4	6.1	18	17.97	47.4	10.83	1.56	38	4.25	3.77	140.4	3.34	1.03	1.14	1.43	0
1	59	2	1	1	0	0	0	60	155	60.6	80	94	0.85	0	0	0	2	1	0	0	25.215	124.5	75.5	153	6.6	210	5.9	6.5	56	34	43.9	10.1	1.32	117.3	9.28	4.75	140.6	4.58	0.95	3.66	1.01	0
1	59	2	1	1	0	0	0	0	176	74	80	90	0.88	0	0	0	0	1	0	0	23.88	121.5	73	125	5.12	221	5.6	6.1	21	21.09	41.72	8.2	3.22	6.93	4.02	3.94	137.3	3.81	1.27	2.32	1.09	0
1	59	2	1	1	0	0	0	0	169	68.1	86	101	0.85	0	0	0	0	1	0	0	23.84	123.5	74.5	128	5.06	223	5.3	8	16	27	47.5	40.59	10.11	143	7.53	4.8	139.5	4.42	1.19	1.91	1.52	0
0	59	2	0	1	0	0	0	0	158	65.7	80	86	0.93	0	0	0	0	1	0	0	26.31	125	74.5	121	5.83	250	5.6	6	10	20	41.1	7.2	2.1	47	7.27	4	141	5.73	1.13	3.88	1.32	0
1	59	2	1	1	0	0	0	0	170	58.1	83.5	95	0.86	0	0	0	0	1	0	0	20.1	127	72	145	5.47	215	5.3	6	17	33	51.25	10.7	3.04	65	5.17	4.44	135	4.13	0.78	2.55	1.48	0
1	59	2	1	1	0	0	0	30	175	72.6	84	92	0.91	0	0	0	2	1	0	0	23.7	127	74	148	7.07	211	5.5	6	25	21	48.36	20.5	6.42	94	6.84	4.03	137.8	3.84	1.46	2.17	0.91	0
1	59	3	1	1	0	0	0	40	174	89.7	96	106	0.9	0	0	0	1	1	0	0	29.62	125	77.5	143	6.84	218	5.7	6.1	30.3	24	47.4	13.7	1.72	88	5.66	3.96	141.6	5.44	2.11	3.58	1.06	0
1	59	2	1	1	0	0	0	30	173	77.5	85	106	0.8	0	0	0	1	1	0	0	25.89	123.75	75.5	146	7.11	177	6.2	5.9	32.88	28	52.2	14.3	3.54	86.31	4.45	4.32	138.4	7.46	3.77	4.64	1.45	0
0	59	3	1	1	0	0	0	30	161	59	76	89	0.85	0	0	0	1	1	0	0	22.76	126	76	154	6.25	216	6	6.5	127	70	45.2	17.9	1.4	60.28	3.83	4.26	142.4	5.76	1.15	4.1	1.35	0
0	59	2	1	1	0	0	0	30	162	60.4	82	84	0.98	0	0	0	1	1	0	0	23.01	124	75.75	136	6.72	132	6.3	6.5	9	18	47.7	16.2	2.58	65.6	6.32	4.22	142.1	3.62	2.11	2.26	1.13	0
1	59	2	1	1	0	0	0	30	176	78.1	93	100	0.89	0	0	0	1	1	0	0	25.205	125.25	75	148	5.61	199	5.7	5.5	20	36	48.46	23.67	3.05	66.9	4.16	4	140	7.5	0.6	5.92	1.32	0
1	59	3	0	1	0	0	0	0	170	98	104	110	0.96	0	0	0	0	1	0	1	33.91	123.5	76.5	172	3.2	252	5.4	6.5	26	21	49.67	35.9	7.58	35	6.37	3.8	135.6	4.03	0.84	2.51	1.12	0
0	59	3	1	1	0	0	0	30	161	71.9	94	103	0.91	0	0	0	1	1	0	0	27.73	123.75	73.5	124	5.07	269	5.4	6.4	48	43	47.24	11.7	1.85	70	4.16	4.43	138.7	9.12	3.07	4.86	1.9	0
1	59	2	1	1	0	0	1	30	172	73.7	60	66	0.9	0	0	0	2	1	0	0	24.91	122.5	74.5	165	5.29	166	5.8	5.4	17	14	48.36	16.8	3.31	68.3	5.52	4.46	138.1	4.91	0.59	3.13	1.55	0
1	59	2	0	1	0	0	0	0	165	69	80	90	0.88	0	0	0	0	1	0	0	25.34	126.5	77.5	127	5.75	255	5.3	6.41	16	20	47.6	13.8	4.85	77	4.83	4.16	137.4	5.23	1.31	4.05	1.02	0
1	59	3	1	1	1	0	0	40	172	81.25	87.5	97	0.97	0	0	0	1	0	0	0	27.46	132.25	84	169	4.17	184	6.2	5.1	17.97	16	47.2	12.96	1.8	80	5.33	3.69	141	4.89	1.22	3.96	0.66	0
1	59	3	1	1	0	0	0	30	185	84.3	95	102	0.93	0	0	0	1	1	0	0	24.625	127.5	77.25	150	5.45	219	5.6	6.2	10	15	47	9.7	1.57	78.9	4.82	3.94	140.4	3.22	2.23	1.54	0.91	0
0	59	3	1	1	0	0	0	20	160	67.5	90	106	0.85	0	0	0	1	1	0	0	26.365	129.75	76	139	4.09	215	6	5.8	22	23	43.2	9.9	1.8	57	6.65	4.35	141.6	4.1	0.83	2.86	1.1	0
0	59	3	1	1	0	0	0	30	161.5	68.6	80.5	94	0.89	0	0	0	2	1	0	0	26.305	135.75	82	143	4.65	284	5.2	5.4	12	14.13	46.2	10.78	1.1	64.1	7.92	4.49	138.7	6.29	0.44	4.89	1.57	0
1	59	3	0	1	0	0	1	50	173	62.3	77	88	0.88	0	0	0	2	1	0	0	20.81	124.5	74.25	150	6.72	174	6.1	5.4	16	18	45.1	9.36	1.4	67	5.38	3.69	139.5	4.07	0.95	2.87	1.13	0
1	59	2	1	1	0	0	0	30	178	98.55	102	119	0.93	0	0	0	2	1	10	0	31.1	124.75	73	149	8.72	300	5.7	6.2	82	76	42.7	17.31	2.68	83	4.36	3.53	137	2.99	1.04	1.66	0.92	0
0	59	2	1	1	0	0	0	20	163	79	98	108	0.9	0	0	0	1	0	0	0	37.56	133	80	137	5.86	195	5.3	5.2	15.39	17	47.9	8	1.7	82.42	6.03	4.45	144.1	3.89	1.4	1.93	0.99	0
1	59	3	0	1	0	0	0	30	175	84	90	102	0.88	0	0	0	2	1	0	0	27.42	124.5	73.5	148	7.41	158	8.84	8	19	17	49.7	12.6	3.28	83	6.56	3.86	138.2	3.64	1.24	2.26	0.8	0
1	59	3	1	1	0	0	0	30	162	86.1	115	130	0.87	0	0	0	1	1	0	1	32.805	125.5	78	148	6.66	246	5.9	5.8	21	30	49.6	12.5	2.17	78.2	5.94	4.28	138.9	6.41	1.39	4.34	1.47	0
0	59	3	0	1	0	0	1	30	163	61.45	80	87	0.92	0	0	0	1	1	0	0	23.125	124.5	75.5	141	6.18	300	5.3	6.6	51	30	46.35	9.3	0.7	53	3.88	4.05	138.5	7.03	1.4	5.28	1.29	0
1	59	3	0	1	0	0	0	50	172	71.75	76	84	0.9	0	0	0	1	1	0	0	24.245	125.5	77.5	129	5.84	156	5.6	6.1	30.6	23	42.5	10.4	2.2	86	7.3	4.37	141.6	4.09	1.68	2.59	1.04	0
1	59	2	1	1	0	0	0	60	176	62.2	82	93	0.88	0	0	0	1	1	0	0	20.075	125.5	70.25	150	4.1	206	5.7	5.7	27.34	27	47.7	14.9	2.25	82	3.28	4.2	138.7	4.18	1.57	2.44	1.35	0
0	59	2	1	1	1	0	0	30	148	57.8	89	94	0.94	0	0	0	2	1	0	0	26.38	123	75.5	130	8.74	254	5.6	7.2	17	18	45	8.8	1.3	42	6.02	4.54	140.4	4.61	1.89	3.13	0.9	0
0	59	2	0	1	0	0	0	40	160	63.7	86	98	0.88	0	0	0	1	1	0	0	24.88	126.5	74	129	6.49	255	5.5	7.1	36.71	29	44.8	9.2	1.6	67	3.51	4.14	140.8	4.78	1.7	2.57	1.41	0
1	59	3	1	1	0	0	0	30	172	79	86	96	0.89	0	0	0	2	1	0	0	26.7	124.5	76.5	160	8.07	235	5.3	5.8	31	27	49	25.6	5	67.4	3.82	3.69	140	3.54	1.27	1.9	0.83	0
1	59	3	1	1	0	0	0	30	176	58.55	71	86	0.83	0	0	0	1	1	0	0	18.895	126.25	76.25	161	10.65	229	5.6	5.8	9	15	47.9	14.9	2.17	72	6.58	4.54	140	5.7	2.02	4.06	1.02	0
1	59	2	1	1	0	0	0	50	173	76.05	89	98	0.91	0	0	0	1	1	0	0	25.405	125.75	78.25	158	5.33	206	6.3	6.8	22	18	49.7	10.34	1.8	68.7	5.84	4.38	138	3.69	1.32	2.6	1.62	0
1	59	3	1	1	1	0	1	60	169	64.7	86	94	0.91	0	0	0	1	1	0	0	22.65	132.5	78	160	4.44	170	5.7	6.1	28	21	48	13.73	0.4	83	5.92	3.69	138.6	6.71	0.89	5.15	0.78	0
1	59	2	1	1	0	0	0	30	165.3	64.05	81	97	0.83	0	0	0	1	0	4	2	23.435	126.25	74	160	4.91	179	5.6	5.6	15	21	47.9	10.33	2.2	75	6.56	4.14	138.9	5.36	0.97	3.13	1.49	0
0	59	3	1	1	0	0	0	0	160	68.1	80	90	0.88	0	0	0	0	1	0	0	26.6	126.5	75.5	146	5.04	221	5.7	6	20	22.42	50	15.8	3.53	53.7	4.78	3.77	138.5	4.08	2.45	1.64	1.2	0
0	59	2	0	1	0	0	0	30	162	66.9	79	98	0.81	0	0	0	2	1	0	0	25.49	132.25	76.75	130	5.6	232	5.2	6	54	32	47	10.5	1.68	56.5	3.09	4.04	139.6	5.04	1.6	3.02	1.04	0
1	59	2	1	1	0	0	0	30	163	55.2	78	88	0.88	0	0	0	1	1	0	0	20.77	124	74	143	7.93	330	5.5	6.7	49	110	45.33	14	3.5	80	4.3	3.72	138.2	4.45	1.12	2.46	1.68	0
1	59	2	0	0	1	0	0	30	173	79	87	98	0.885	0	0	0	1	1	15	1	26.395	125.75	75	143	4.74	258	5.9	5.2	24	19	42.1	15.05	2.3	69	7.05	4.24	143.1	4.12	1.22	3	0.99	0
1	59	2	1	1	0	0	0	30	160	65	84	96	0.88	0	0	0	2	1	5	1	25.39	129.5	75.5	143	7.72	220	6.3	6.4	29	22	45.4	8.97	1.3	66	6.11	4.33	138	4.7	1.2	3.06	1.19	0
0	59	3	1	1	0	0	0	30	164	65.9	80	98	0.88	0	0	0	1	1	0	0	24.5	124.5	76.5	130	7.84	284	5.3	5.7	18	24	47.2	7	2.98	58	5.78	4.25	138	5.07	1.16	3.43	1.7	0
1	59	2	1	1	0	0	0	15	170	73	87	94	0.93	0	0	0	1	1	0	0	25.25	127	76.5	145	4.65	180	5.6	5.4	18.45	15	45.5	12	0.4	60	4.86	2.81	140.2	5.42	1.14	3.97	0.93	0
1	59	3	1	1	0	0	0	20	178	86.2	107	106	1	0	0	0	1	1	6	1	27.2	125.5	76	154	7.32	218	5.6	6.2	42	25	45.33	22.77	4.1	114.3	6.45	4.1	144.1	3.09	2.43	1.59	0.76	0
1	59	3	1	1	1	0	1	60	178	81.45	91	95	0.96	0	0	0	2	1	0	0	25.7	130.75	75	144	6.18	191	6.5	5.7	20	18	48.85	11.41	1.78	81.8	5.78	3.69	138.7	5.09	3.24	2.21	1.17	0
0	59	2	1	1	0	0	0	30	160	59.1	76	86	0.8	0	0	0	1	1	0	0	23.08	123.5	74	142	11.58	186	5.6	6	14	22	46.5	13.7	1.37	60.7	5.93	4	137.7	6.2	1.68	4.3	1.69	0
0	59	2	1	1	0	0	0	0	165	64.9	80	90	0.88	0	0	0	0	1	0	0	23.83	123	74	123	4.95	160	5.7	6	18	22	45.6	15.35	2.71	72.1	5.57	4.05	140.1	6.74	2.09	3.84	1.65	0
1	59	3	0	1	1	0	0	30	174	75.2	85	96	0.89	0	0	0	1	1	0	0	24.83	125.5	72.5	153	6.09	231	5.47	6.1	78	40	47.8	21.1	3.1	63.1	5.54	3.69	141	2.99	1.97	1.56	1.13	0
0	59	2	1	1	0	0	0	30	173	68	75	89	0.84	0	0	0	2	1	0	0	22.72	121	78.5	132	7.17	297	5.3	5.8	20	20	44.7	7.9	1.6	61.5	3.97	4.5	143.6	4.75	1.01	2.67	1.65	0
1	59	2	1	1	0	0	0	30	160	60.25	84	96	0.88	0	0	0	1	1	2	0	23.53	128	77.25	146	6.14	194	5.5	6.3	28	22	41.8	9.3	2.9	77	7.19	3.68	139.3	4.82	1.49	3.32	0.91	0
1	59	3	1	1	0	0	0	60	176	65.3	80.5	90	0.895	0	0	0	1	1	0	0	21.075	133	62.25	150	5.86	204	6.8	6.1	20	17	44.7	12.74	1.3	78.85	6.56	4.23	137.5	4.72	1.6	3.17	0.85	0
0	59	2	1	1	1	0	0	30	162	60.15	75	80	0.93	0	0	0	1	1	0	0	22.915	125.5	71.75	140	7.65	211	5.8	6.4	16	21	46.2	18.7	3.4	83.5	5.4	4.1	140	4.67	0.49	2.57	1.64	0
1	59	2	1	1	0	0	0	30	163	69.7	87	105	0.825	0	0	0	1	1	0	0	26.23	123.25	75.5	139	6.52	283	5.4	6.4	29	22	46	15.6	8.1	68	4.51	5.25	136.3	3.92	1.7	1.9	1.22	0
0	59	3	1	1	0	0	1	20	170	62.2	70	91	0.77	0	0	0	1	1	0	0	21.52	125	74	132	4.86	206	5.7	5.6	13	16	46.7	10.5	1.6	55	4.92	4.19	139.4	6.35	1.12	4.3	1.52	0
0	59	2	0	1	0	0	0	30	161.8	51.8	74	89	0.83	0	0	0	1	1	0	0	19.78	126	73.5	133	5.74	235	5.5	5.6	11	16	46.9	7.2	2.51	100	7.57	5.31	139.6	4.49	1.46	2.42	1.64	0
0	59	2	1	1	1	0	0	30	169	64	82.5	101.5	0.81	0	0	0	1	1	0	0	22.4	128.75	77.5	102	6.64	316	6.3	6.7	19	26	45.3	9.4	1.78	62	7.32	4.47	142.5	6.62	3.52	3.83	1.34	0
1	59	2	1	1	0	0	0	30	182	83.8	87	95	0.92	0	0	0	1	1	10	2	25.29	124	73.5	157	5.58	248	5.8	6	33	26	47.6	12.46	3.19	65	5.17	4.19	142.4	4.16	2.06	2.1	1.24	0
0	59	2	1	1	0	0	0	30	164	76.25	84	100	0.84	0	0	0	1	1	0	0	28.345	128.75	76.5	121	5.97	296	5.4	5.2	21	16	45.9	8.6	1.4	62.6	4.76	4.3	137.7	5.48	1.48	3.04	1.37	0
1	59	2	1	1	1	0	0	30	165	72.05	80	90	0.88	0	0	0	1	1	0	0	26.46	125.5	74.25	150	6.89	218	5.7	5.9	26	23	46.2	10.3	1.8	68	4.52	3.53	138.6	3.72	1.17	2.4	1	0
0	59	2	0	1	0	0	0	30	168	66.55	80	92	0.87	0	0	0	2	1	0	0	23.575	124	75.75	137	5.48	183	5.9	6.1	19	20	47	8.9	2.98	73.6	4.51	4.45	137.6	5.05	0.95	3.12	1.6	0
0	59	2	1	1	0	0	0	0	157	61.35	77	87	0.89	0	0	0	0	1	0	0	24.885	128.75	79.25	133	5.72	295	5.6	5.8	22	27	45.3	11.33	1.4	68	5.21	4.54	141.9	7.29	2.44	5	1.24	0
1	59	2	1	1	0	0	0	40	172	77.45	73	97	0.75	0	0	0	2	0	0	0	26.175	124.5	74.5	161	5.3	221	5.9	7.5	14	17	48.4	16.54	2.68	59	4.87	3.77	137.3	3.37	0.94	1.87	1.17	0
1	59	3	1	1	0	0	0	30	172	69.4	84	93	0.9	0	0	0	1	1	0	0	23.455	126.5	75.5	165	5	230	5.4	5.7	9	16	46	7.4	1.8	76.1	5.28	4.26	139.3	4.84	3.72	2.7	0.96	0
1	59	2	1	1	0	0	1	20	167	73	86	90	0.95	0	0	0	2	1	0	0	26.17	121	74.5	128	8.16	193	5.7	6.1	19	24	42.5	11.87	2.77	60.4	3.5	3.73	135	4.4	0.87	2.9	1.04	0
0	59	2	1	1	0	0	0	20	160.2	62.6	80	90	0.88	0	0	0	1	1	0	0	24.39	127.5	77	135	5.43	244	5.8	6.2	25	23	45.9	12.98	2.49	42	5.45	4.23	139.2	4.52	0.92	2.68	1.39	0
1	59	2	1	1	0	0	0	20	178	74.45	82	94	0.87	0	0	0	1	1	0	0	23.49	124	74	165	4.77	213	6.1	6.1	15.88	19	49.8	18.32	2.9	50	6.41	3.93	140	5.44	1.73	2.28	1.33	0
1	59	2	1	0	0	0	0	0	172	89.5	100	112	0.92	0	0	0	0	1	6	2	30.25	123	77	156	5.94	203	5.2	5.7	35	24	48.8	10.2	3.55	159.9	5.31	5.31	141.7	4.68	1.56	2.92	1.25	0
0	59	2	1	1	0	0	0	0	174	96.1	82	92	0.89	0	0	0	0	1	0	0	31.74	121	75.5	143	6.29	170	5.3	5.7	111	45	48.8	18.6	1.8	66	5.31	4.33	141	4.75	0.5	3.96	1.19	0
1	59	2	1	1	0	0	0	30	175	67.75	75	89	0.84	0	0	0	1	1	0	0	22.12	124.75	75	128	4.74	229	6.1	5.9	16	16	48.5	7.53	7.3	86.6	4.42	4.46	137.8	3.85	0.79	1.98	1.84	0
1	59	2	0	1	0	0	0	0	178	95	94	103	0.91	0	0	0	0	1	0	0	29.98	124.5	77.5	156	5.31	147	5.2	5.7	30	20	49	16.34	5.06	53.1	7.03	3.72	140	3.9	1.7	2.24	0.94	0
1	59	2	1	1	0	0	0	30	170	77.6	98	100	0.98	0	0	0	2	1	0	0	26.85	125.5	76	147	6.22	191	5.6	5.8	17	17	42.8	6.01	1.2	57.1	4.16	3.77	139.3	4.99	1.45	3.23	1.02	0
1	59	2	1	1	0	0	0	60	164	63.35	85	93.5	0.91	0	0	0	1	0	10	0	23.55	129.25	76	137	6.87	204	6.3	7.5	20	17	43.2	13.79	2.8	86.9	4.69	4.05	138.7	3.34	1.09	1.16	1.28	0
1	59	2	1	1	0	0	0	30	176	87.8	98	102	0.96	0	0	0	2	1	0	0	28.34	126.5	65.5	153	3.15	173	5.9	6.3	8	10	46.9	25.9	7.18	74.5	6.33	4.61	137	3.74	0.88	2.78	0.93	0
0	59	3	1	1	0	0	0	45	164	71.2	85	98	0.87	0	0	0	2	1	0	0	26.465	127.25	77.5	134	6.95	323	5.6	6.5	19	18	50.1	11.98	2.74	66.2	3.48	4.22	135	4.93	2.31	1.89	1.69	0
1	59	2	1	1	0	0	0	0	170	87.8	117.5	130	0.92	0	0	0	1	1	0	0	38.06	124.25	74.25	143	5.46	300	5.5	6.6	20	19	47.7	16.7	3.12	81	4.32	4.55	138.5	3.98	2.55	1.82	1.01	0
1	59	3	1	1	0	0	0	0	172	79.8	80	86	0.93	0	0	0	0	1	0	0	26.97	130	82	152	7.95	171	5.7	6.2	38	36	46.2	13.8	3.3	86.6	4.68	3.76	141.2	4.79	1.18	3.18	1.1	0
0	59	3	1	1	0	0	0	60	156	79.45	90	100	0.9	0	0	0	2	1	0	0	32.64	129.25	77	135	6.21	283	6	6.1	17	23	47.65	10.47	1.8	58.05	5.17	4.46	140.7	3.57	1.13	1.84	0.94	0
1	59	3	0	1	0	0	0	30	177	85	96	106	0.9	0	0	0	2	1	0	0	27.13	120.5	79	154	6.01	301	5.6	5.2	26	20	48.7	12.4	1.96	68	3.9	2.81	142.9	4.6	1.19	2.96	1.23	0
1	59	2	1	1	0	0	0	0	178	85	96	105	0.91	0	0	0	0	1	0	0	26.82	126	77.5	157	5.36	172	5.8	5.8	47	31	46.9	19.12	4.7	76.38	4.47	4.19	141.6	4.76	1.37	2.86	1.17	0
0	59	2	1	1	0	0	0	0	160	64.8	80	92	0.86	0	0	0	0	1	0	1	25.31	121	73	128	4.62	186	5.7	5.7	13	23	45.7	10.09	1.57	48.2	5.71	4.58	141.3	4.65	0.99	2.67	1.63	0
1	59	2	1	1	0	0	0	30	171	78.7	92	103	0.89	0	0	0	1	1	0	0	26.91	126.5	76.5	145	6.06	183	6.1	6	22	22	49.6	13.7	1.91	110.39	6.09	4.32	138	4.67	1.48	2.77	0.86	0
0	59	3	1	1	0	0	0	30	165	70.3	82	92	0.89	0	0	0	1	1	0	0	25.82	133	74	127	7.26	228	5.9	6.5	18	16	45.2	7.57	1.24	55.6	4.92	4.72	141.6	5.75	1.1	3.97	1.4	0
1	59	2	1	1	1	0	0	30	170	84.2	88	95	0.92	0	0	0	1	1	0	1	29.13	131	79	151	4.06	127	6	5.6	21	22	46.9	12.2	2.2	67.4	4.97	3.94	141.7	3.51	0.51	2.65	0.92	0
1	59	2	1	1	1	0	0	15	169.5	68.3	84	95	0.88	0	0	0	1	1	0	0	23.765	125.5	74	147	5.44	123	5.6	6.2	36	28	46.3	24.7	4.2	62.81	4.33	3.69	140	3.15	1.02	1.85	1.14	0
1	59	3	1	1	0	0	0	50	164.5	76.3	86	95	0.905	0	0	0	1	1	8	1	28.285	133	83.5	174	6.12	256	5.2	6.4	38	25	46	16.39	2.63	89	5.02	4.16	141.9	4.42	1.33	3.13	1.02	0
1	59	3	1	1	0	0	0	20	168	61.7	72	80	0.9	0	0	0	2	1	0	0	21.855	128	73	161	4.26	220	6.2	5.8	15	16	51.4	12.5	3.34	73.6	3.58	4.14	137.3	5.7	0.79	3.54	1.47	0
1	59	2	1	1	0	0	0	30	170	63.3	82	94	0.87	0	0	0	2	1	0	0	21.9	123.5	73.5	176	5.65	212	6.2	5.9	17	21	49	8.1	1.57	68	3.33	3.8	135.6	5.07	1.16	2.87	1.06	0
1	59	3	0	1	0	0	0	0	180	80	80	90	0.88	0	0	0	0	1	5	0	24.69	120	77.5	151	6.59	210	5.6	6.1	34	21	46.9	10.97	2.2	91.1	8.95	4.71	137.7	3.37	1.27	1.98	1.05	0
0	59	3	1	1	0	0	0	0	163	65.8	78	86	0.9	0	0	0	0	1	0	0	24.76	121	73.5	141	5.51	132	5.9	5.8	20	23	48.4	9.99	2.2	68.6	5.65	4.27	139.2	4.84	2.37	2.4	1.31	0
0	59	2	0	1	1	0	0	30	164	73.55	90.5	113	0.8	0	0	0	1	0	0	0	27.34	132.75	78	138	5.55	268	5.2	6.1	20	18	47.9	10.03	2.8	48.8	5.59	4.57	143.8	4.14	1.11	2.18	1.35	0
0	59	3	1	2	1	0	0	60	168	62.85	83	99.5	0.835	0	0	0	2	1	0	0	22.265	133.5	82.25	114	5.22	238	5.2	5.6	16.45	33	44.5	11.66	1.48	63.03	4.16	4.38	138	5.02	0.93	2.34	1.94	0
0	59	3	1	1	0	0	0	50	162	61	83	90	0.92	0	0	0	1	1	0	0	23.24	125.5	74	123	5.18	247	5.1	6	17	29	45.1	8.26	1.1	54	5.87	4.55	139.3	5.85	0.56	4.03	1.75	0
0	59	2	1	1	0	0	1	45	154.8	58.1	79	88	0.9	0	0	0	2	1	0	1	24.24	125	74	140	4.97	213	5.8	6.5	19	23	45.1	15.17	2.58	49.6	5.34	5.05	139.7	4.79	0.52	2.83	1.79	0
1	59	2	1	1	0	0	0	30	176	88.05	85	98	0.89	0	0	0	1	1	0	0	28.42	124.5	78	144	5.71	159	5.9	6.4	17	19	48.2	9	1.9	97.23	5.64	4.24	140.6	5.07	1.21	3.25	1.51	0
1	59	2	0	1	0	0	0	0	172	71.55	84	88	0.95	0	0	0	1	1	5	0	24.18	125.5	76.25	159	5.66	218	6	6.5	48	36	48.7	13.2	2.3	59	7.49	4.01	136.9	2.82	0.71	1.39	1	0
1	59	2	1	1	0	0	0	30	172	74.1	87	98	0.88	0	0	0	2	1	5	0	25.04	121.5	73.5	144	5.49	235	6.1	6.1	27	27	47.79	19.3	4.55	82	5.47	4.23	140.2	3.53	2.13	2.07	0.89	0
1	59	3	1	1	0	0	0	50	175	96	104	120	0.86	0	0	0	1	1	0	1	31.34	125.5	77.5	150	9.74	213	5.7	6.7	39	24	46.5	24.37	5.79	97.6	5.64	3.81	139	3.88	0.75	2.54	1.2	0
1	59	2	0	1	0	0	0	0	183	78.65	83	92	0.9	0	0	0	0	1	0	0	23.485	125.75	74.75	152	6.87	236	5.4	6.1	34	19	45.33	18.31	3.19	53.1	4.45	4.17	140.5	6.95	0.99	4.51	1.75	0
1	59	3	1	1	0	0	0	30	172	62.4	90	100	0.9	0	0	0	2	1	0	2	21.09	121	73.5	163	7.14	270	5.9	5.8	17	17	46.6	9.56	1.56	65.6	4.49	4.29	142.4	3.51	0.89	1.82	1.46	0
1	59	2	0	1	0	0	0	30	172	76.3	86	95	0.91	0	0	0	2	1	0	0	25.79	127.5	73.5	146	7.19	331	5.6	6.4	23	22	46.9	18.7	2.94	68	4.3	3.69	140	6.07	2.08	4.02	1.22	0
1	59	2	1	1	0	0	0	30	169	65.2	76	94	0.81	0	0	0	1	1	10	1	22.825	122.5	75.5	162	4.28	176	6.3	6.1	16	26	49.8	7.6	1.86	71	7.56	4.58	138.2	4.61	1.61	2.8	1.2	0
0	59	2	1	1	0	0	0	0	162	60.2	74	91	0.81	0	0	0	2	1	0	0	22.93	123.5	76.5	129	5.46	271	5.8	6.4	15	24	48	14.36	3.81	44.5	4.14	4.92	140.6	6.17	3.23	3.99	0.99	0
0	59	3	1	1	0	0	0	30	164	52	72	82	0.87	0	0	0	1	1	0	0	19.33	120.5	71	142	4.27	264	5.4	5.9	13	19	48	11.5	1.32	47	6.37	3.98	137.8	4.99	0.84	3.02	1.52	0
0	59	2	1	1	0	0	0	40	162	61.1	77	82	0.94	0	0	0	1	1	0	0	23.275	125	76.25	145	6.14	233	6	6.4	28	27	44.5	12.95	2	61	4.82	4	139	3.64	0.74	1.83	1.77	0
1	59	3	1	1	0	0	0	0	170	80.65	104	110	0.95	0	0	0	0	1	0	0	34.785	126.5	59.5	137	6.66	253	6.3	7.5	31	27	49.8	13.9	1.21	112.8	7.12	4.83	141.7	4.1	1.88	1.59	1.49	0
0	59	2	1	1	0	0	0	30	162	55	77	90	0.85	0	0	0	2	1	0	0	20.95	129	71.5	125	3.95	188	5.7	6	18	20	46.1	14.16	1.86	76	4.19	4.54	137.5	5.37	0.81	3.22	1.82	0
1	59	3	1	1	0	0	0	30	184	77.85	90	100	0.9	0	0	0	1	1	10	1	22.99	124	74.5	137	4.82	208	5.6	6.2	28	17	46.82	16.3	2.1	88	5.46	4.06	140	3.66	1.63	1.77	1.25	0
1	59	3	0	1	0	0	0	30	168	79	102	108	0.94	0	0	0	1	1	2.5	0	27.985	129.75	73.75	153	7.92	240	5.8	6.5	12	21	47.8	13.31	3.31	76.7	6.15	4.8	142.2	5.1	0.88	3.54	1.21	0
0	59	2	1	1	0	0	0	40	160	64.7	78	88	0.89	0	0	0	1	1	0	0	25.265	124.5	73.75	137	7.51	294	5.8	7	24	16	48.7	15.08	3.14	53	3.24	4.44	137	4.27	1.89	2.05	1.18	0
0	59	3	1	1	0	0	0	30	162	53.25	74	90	0.82	0	0	0	2	1	0	0	20.285	126	75.25	140	5.8	274	5.3	6	18	19	44.8	9.9	1.3	66	6.67	4.4	138.2	6.69	1.88	4.47	1.63	0
1	59	2	1	1	0	0	0	0	174	85.1	82	90	0.91	0	0	0	2	1	0	1	28.1	126.5	76	128	9.01	224	6	6	21	26	44.7	13	2.1	86.9	5.01	4	139.4	4.25	0.63	2.12	1.67	0
0	59	3	1	1	0	0	0	35	160	56	70	90	0.77	0	0	0	2	1	0	0	21.87	129	80	133	6.05	210	5.9	7.4	23	19	45.2	6.86	0.7	55	4.5	4.3	141.1	5.33	1.08	4	1.18	0
1	59	3	1	1	0	0	0	20	172	78.3	84	93	0.9	0	0	0	2	1	15	0	26.46	127.5	75.5	170	7.36	208	5.4	5.8	22	21	48	14.1	3.64	83	5.63	4.55	137.7	5.85	1.6	4.5	1.32	0
0	59	2	0	1	0	1	0	30	153	57.5	83.5	94.5	0.88	0	0	0	1	1	0	0	24.56	127.75	77.25	145	5.15	362	6.4	6.8	18	20	49.7	12.1	1.78	65.2	4.82	3.99	141.3	4.27	1.02	2.2	2.05	0
0	59	2	1	1	0	0	0	40	160	67	86.25	91	0.95	0	0	0	1	1	0	0	26.17	131.75	82.75	137	5.72	257	5.2	6.2	27	23	44.5	9.1	1.89	58	5.58	3.94	137.7	3.39	1.03	1.86	1.3	0
1	59	3	1	1	0	0	0	50	170	97.4	105	110	0.95	0	0	0	1	1	0	0	33.7	126.5	78	154	6.18	309	6.7	6.4	14	17	44.1	15.88	3.82	78.7	5.71	4.2	135.3	5.18	1.46	3.56	1.14	0
1	59	3	1	1	0	0	0	30	155	60.1	89	103	0.86	0	0	0	2	1	0	0	25.015	127.25	73.75	152	5.58	105	5.4	5.6	12	17	46.7	15.62	4.03	47	5.21	4	138.4	6.58	1.59	4.14	1.51	0
1	59	2	1	1	1	0	0	0	168	67.2	83	87	0.95	0	0	0	0	1	0	0	23.805	125	76.5	154	3.88	159	5.6	5.8	31	25	49	15.2	1.91	68.7	7.65	4.11	139.9	4.54	2.14	2.76	1.15	0
0	59	2	0	1	0	0	0	50	160	60.5	84	94	0.89	0	0	0	1	1	0	0	23.63	125	75.5	142	6.72	249	6.6	6.9	10	17	48.36	12.92	2.2	54	6.01	4.04	139.2	5.17	1.21	3.03	1.82	0
1	59	3	1	1	0	0	0	0	173	65	85	96	0.88	0	0	0	0	1	0	0	21.71	120.5	79.5	135	6.94	297	5.8	6.5	16	24	51.4	8.28	1.8	97	4.76	4.46	137.3	7.01	2.34	5.31	1.04	0
0	59	3	1	1	0	0	0	30	160	60	80	94	0.85	0	0	0	2	1	0	0	23.43	121.5	70.5	144	7.89	221	5.4	6	12	14	44.8	9.5	1.4	51.5	5.02	4	138.7	3.65	2.43	2.05	1.1	0
0	59	2	1	1	1	0	0	30	160	68	84	98	0.86	0	0	0	2	0	0	0	26.56	130	75	139	5.38	177	5.1	6	103	58	51.25	23.48	2.9	66	6.39	4.57	141.8	4.34	2.22	1.71	1.63	0
0	59	2	1	1	0	0	0	30	158	80	90	100	0.9	0	0	0	2	1	0	0	32.04	122.5	78.5	123	6.63	234	5.8	6.5	27	27	45.1	16.51	4.53	55	6.54	3.92	140.84	4.34	1.09	2.7	1.27	0
0	59	2	0	1	0	0	0	50	158	61.7	83	94	0.88	0	0	0	1	1	0	0	24.71	126.75	77	137	7.8	298	6.1	6.4	92	49	42.9	9.5	1.7	52	5.54	3.88	141.7	3.84	2.7	1.41	0.94	0
0	59	2	1	1	1	0	1	60	159.5	54	76.5	85	0.9	0	0	0	2	1	0	0	21.25	131.5	72.75	138	3.95	249	5.2	6.4	21.7	17	46.5	11.3	1.1	44.8	6.28	3.82	142.2	7.88	13.55	1.64	1.06	0
0	59	3	1	1	0	0	0	60	161	66.3	88.5	98	0.905	0	0	0	1	1	0	0	25.575	134	80.25	145	5.64	161	5.2	5.8	34	22	44.5	14.59	1.75	77.5	7.49	4.29	144.1	4.48	1.32	2.63	1.29	0
0	59	3	1	1	0	0	0	30	160	58	83	95	0.87	0	0	0	2	1	0	0	22.65	123.5	75.5	127	6.52	209	5.8	6.7	24	25	44.8	10.36	2.24	51.8	8.2	3.91	140.6	4.05	2.13	1.71	1.17	0
0	59	2	1	1	0	0	0	60	165	62.05	82	92	0.89	0	0	0	2	0	0	0	22.785	124.75	75.25	135	6.53	230	5.4	6.6	34	29.78	44.5	22.38	6.42	55.9	5.55	4.11	140.6	3.78	1.52	1.42	1.61	0
0	59	3	1	1	0	0	0	0	162	79	88	95	0.92	0	0	0	0	1	0	0	30.1	121.5	79	137	4.1	155	5.7	6	26	19	44.5	9.91	1.54	63	8.15	4.23	141.9	5.94	1.14	4.6	1.11	0
0	59	2	1	1	0	0	0	20	157	55.2	80	90	0.88	0	0	0	2	1	0	0	22.39	119	69	133	4.76	196	5.2	6.2	24	23	43.2	9.41	1.76	41	4.18	3.96	138.8	3.95	2.04	2.14	1.05	0
1	59	2	1	0	0	0	0	30	184	90	85	100	0.85	0	0	0	2	1	0	1	26.58	120.5	76.5	139	4.5	190	5.3	5.5	18	22	46.9	14.8	3.86	78	4.3	3.65	140.7	4.77	0.94	3.32	0.94	0
1	59	3	0	1	0	0	0	30	172	70.1	82	90	0.91	0	0	0	1	1	0	1	23.69	119.5	74.5	162	6.38	241	5.6	5.3	19	27	47.2	27.5	7.18	86.1	5.42	4.48	140	4.64	1.26	2.87	1.77	0
0	59	3	1	1	0	0	0	0	162	59.8	82	89	0.92	0	0	0	0	1	0	0	22.78	117	69	122	2.66	254	5.9	6.1	20	25	47.5	11.3	2.71	57	5.74	4.21	139.4	3.45	0.71	1.71	1.34	0
1	59	2	1	1	0	0	0	0	165	86	98	106	0.92	0	0	0	0	1	15	0	31.58	134	75	153	8.28	204	5.4	6.2	27	28	43.1	11.7	2.6	109.8	6.71	4.76	138.7	4.36	1.12	2.92	0.92	0
1	59	3	1	1	1	0	1	30	178	93.55	96	108	0.89	0	0	0	1	1	0	0	29.52	125.75	76	150	7.46	164	6	5.8	29	21	44.5	8.37	1.3	64	4.59	3.69	137	4.67	1.17	2.45	0.91	0
1	59	3	1	1	0	1	0	50	175	66.5	82	90	0.91	0	0	0	1	1	13	1	21.71	124.5	76.5	158	4.18	226	5.4	5.7	13	18	44.7	14.32	1.6	83.9	4.48	4.32	141	4.23	0.84	2.64	1.21	0
0	59	2	0	1	0	0	0	0	160	54.6	75	80	0.93	0	0	0	0	1	0	0	21.32	123.5	73.5	134	5.06	183	5.6	7.3	40	38	46.1	14.17	1.8	73	6.66	4.47	141.4	6.33	2.03	5.19	1.13	0
1	59	2	1	1	0	0	0	30	168	76.95	91	100	0.91	0	0	0	2	1	0	0	27.255	123.75	77.5	149	5.48	158	5.4	6.4	24	30	48.1	22.83	6.53	79.3	6.96	4	137	3.77	1.31	1.95	1.37	0
1	59	2	1	1	0	0	0	30	173	68.2	83	90	0.92	0	0	0	1	1	0	2	22.78	123.5	71	166	6.01	154	5.9	6	35	26	46	8.16	2.98	91.37	6.24	4.35	138.9	6.26	2.24	4.14	1.47	0
0	59	3	1	1	0	0	0	30	165	64.7	86	92	0.93	0	0	0	2	1	0	0	23.76	124.5	76	128	5.77	278	5.9	6	21	24	49.1	11.11	2.2	78.2	7.87	4.46	140	5.76	1.2	3.32	1.79	0
1	59	2	0	1	0	0	0	30	176	70.5	84	92	0.91	0	0	0	2	1	0	0	22.75	129	77	150	5.88	187	5.6	6.5	21	19.64	45.2	16.3	2.9	86.6	8.15	4.25	139.2	4.95	1.44	3.15	0.76	0
1	59	2	1	1	0	0	0	30	170	74.6	90	98	0.92	0	0	0	1	1	0	0	25.81	125.5	75.5	145	5.3	261	5.6	5.9	20	23	49.2	11.6	1.4	79	7.2	4.09	140	5.1	0.99	3.53	1.16	0
1	59	2	1	1	0	0	0	30	176	72.65	86	96	0.89	0	0	0	1	1	0	0	23.45	124.5	74.75	153	5.23	197	5.6	6	20	22	49.67	27.8	5.79	89.5	4.6	4.07	140	3.2	0.89	1.49	1.13	0
1	59	3	0	1	1	0	0	30	165	63	98	85	1.15	0	0	0	1	1	0	0	23.14	126	77.5	148	4.98	105	6.1	6.4	95	34	45.4	19.61	1.5	61	6.28	4.38	141	5.29	1.94	3.75	1.14	0
1	59	2	1	1	0	0	0	30	176	72.55	83	95	0.87	0	0	0	1	1	10	1	23.42	123.5	74.5	154	4.34	191	5.4	5.5	23	22	47.2	9.6	1.95	123	7.47	4.32	140.9	5.27	1.08	2.86	1.39	0
0	59	3	1	1	0	0	0	30	158	64.4	82	93	0.88	0	0	0	2	1	0	0	25.79	129	77.5	145	6.21	284	5.1	5.5	10.99	20	49.1	15.19	3.28	60	6.48	4.03	137.8	5.82	1.24	3.54	1.87	0
0	59	3	1	1	1	0	0	35	158	54	65	78	0.83	0	0	0	2	0	0	0	21.63	119	71.5	140	3.74	347	5.9	5.8	24	30	45.2	13.9	2.19	55	5.94	4.7	137.7	6.61	0.9	4.6	1.67	0
0	59	2	1	1	1	0	1	60	158	65.1	82	86	0.95	0	0	0	2	1	0	0	26.07	130	75	124	7.43	235	5.9	9.5	68	38	47.2	7.1	1.48	60	4.92	4	142	3.61	1.61	1.85	1.27	0
1	59	3	1	1	1	0	0	30	168	66	85	97.3	0.8	0	0	0	2	0	0	0	23.38	136.5	85.5	139	7.49	189	6.5	7	22	23	44.7	16.18	3.4	79.2	7.4	4.85	137.7	5.6	0.49	4.02	1.26	0
0	59	3	1	1	0	0	0	50	165	67.5	86	100	0.86	0	0	0	2	1	0	0	24.79	125.5	76.5	110	5.29	234	6	5.5	13	22	43.7	12.5	1.6	61.5	5.5	4.21	140.3	6	1.15	3.32	1.89	0
0	59	3	1	1	0	0	0	30	150.5	60.4	88	97	0.91	0	0	0	1	1	0	0	26.665	127.5	72	120	9.33	253	6.2	6.7	18	20	46.2	8.29	2.2	64	5.82	4.33	140.4	6.07	3.29	3.42	1.11	0
1	59	2	1	1	1	0	0	30	169	74.05	79	87	0.9	0	0	0	1	1	0	0	25.92	125.5	77.5	159	7.36	248	5.7	6.2	28	18.43	45.33	13.11	2.19	80.8	5.05	4	139	3.72	0.94	2.35	1.06	0
0	59	2	1	1	0	0	0	35	160	68	80	90	0.88	0	0	0	2	1	0	0	26.56	126	78	138	6.2	250	5.2	5.6	19	22	45.6	9.15	2.56	73	3.82	4.33	140.5	5.05	3.15	2.66	1.1	0
1	59	3	1	1	0	0	1	30	170	77.3	90	106	0.84	0	0	0	1	1	0	0	26.74	129	77.5	156	6.77	241	6.4	5.8	22	15	49.1	5.1	0.91	100.7	5.48	4.71	137.4	3.47	1.52	2.01	1	0
1	59	3	1	0	0	0	0	20	180	84.5	86	90	0.95	0	0	0	2	1	0	0	30.8	123	76.5	154	5.41	143	5.3	5.7	27	26.83	51.3	9.8	1.5	66	7.84	4.86	138.6	3.11	0.96	2.01	1	0
1	59	2	1	1	0	0	0	30	168	55.8	74	83	0.89	0	0	0	2	1	5	1	19.77	123.5	75.5	136	6.2	260	5.8	5.3	33	29	45.2	11.35	2.19	78.7	4.38	4.3	140	5.64	2.07	2.94	1.12	0
1	59	2	1	1	0	0	0	30	164	68.6	78	88	0.89	0	0	0	1	1	0	0	25.5	122	73	140	6.75	207	5.4	5.4	9	17	47.79	16.08	2.63	75	5.8	4.85	136.5	4	0.86	2.38	1.46	0
0	59	2	1	1	0	0	0	30	157	51.95	77	87	0.89	0	0	0	1	1	0	0	21.07	126.5	73.5	101	6.3	176	6.1	5.3	29	28	38.2	11.09	1.73	66.2	5.64	4.81	140.4	3.95	1.32	2.2	1.42	0
0	59	2	1	1	0	0	0	30	157	62	73	89	0.82	0	0	0	1	1	0	0	25.15	120	78	135	6.22	327	5.1	6.3	13	13	49.2	12.55	1.71	38	4.25	4.22	137.3	5.7	1.55	3.58	1.23	0
0	59	2	1	1	0	0	0	30	176	69.6	80	91	0.87	0	0	0	1	1	0	0	22.465	123	76.5	137	6.36	222	5.8	5.5	17	17	48.4	8.7	0.91	45.3	6.04	4.33	136.9	4.9	1.51	3.46	1.15	0
0	59	3	1	1	0	0	0	30	155	65.5	80	82	0.97	0	0	0	1	1	0	0	27.26	123.5	81	134	3.02	231	5.4	6.7	54	41	45.2	28.3	7.1	56.8	6.23	5.25	140.7	5.67	0.61	3.8	1.03	0
0	59	2	1	1	1	0	0	30	160	65.6	82	102	0.8	0	0	0	1	0	0	0	25.62	122	71.5	127	5.55	231	5.2	5.1	17	23	45.1	13.44	2.2	61.7	4.55	4.02	136	4.2	1.22	2.54	1.12	0
1	59	2	1	1	0	0	0	30	172	69.2	84	94	0.89	0	0	0	1	1	2	0	23.39	122	75	137	5.25	208	5.4	6	25	19	45.3	10.4	1.78	81.4	5.46	4.42	143	3.63	0.71	2.27	1.63	0
1	59	2	1	1	0	0	0	30	170	79	92	103	0.89	0	0	0	2	1	0	0	27.33	124.5	76.25	152	4.41	146	5.4	7.4	20	22	51.2	17.41	4.7	106.4	4.73	3.35	139.1	5.63	1.5	3.73	0.76	0
0	59	2	0	1	0	0	0	30	160	71.9	86	102	0.84	0	0	0	0	1	0	0	28.08	123	74.5	121	6.96	213	5.4	6.3	9	24	47.3	6.83	2.4	66.9	9.86	4.55	135.9	4.43	1.28	2.3	1.69	0
1	59	2	1	1	0	0	0	40	170	62.7	76	85	0.89	0	0	0	1	1	0	0	21.69	123	66.5	161	3.83	251	6.2	6.1	10	25.18	49.8	14.6	3.18	81	6.31	3.8	138.2	5.9	1.83	3.46	1.26	0
0	59	3	1	1	0	0	0	30	160	55	78	92	0.84	0	0	0	2	1	0	0	21.48	129	72	135	4.41	250	5.6	6.2	23	20	43.9	9.48	1.1	54	4.07	4.72	139.9	4.02	1	2.94	1.43	0
0	59	2	1	1	0	0	0	30	155	55.85	83.5	98	0.855	0	0	0	2	1	0	0	23.24	133	80.5	133	6.89	231	5.2	5.8	25	30	45.1	12.8	2.07	44	2.96	4.34	138.8	6.94	1.87	4.06	2.11	0
0	59	3	1	1	0	0	0	30	160	57.1	82	90	0.91	0	0	0	2	0	0	0	22.3	125	73.75	139	4.91	229	6.3	6.6	24.84	22	44.7	14.16	1.5	68.3	4.32	3.98	139	4.59	2.03	2.6	1.19	0
1	59	3	1	1	0	0	0	30	170	82.75	96	106	0.91	0	0	0	1	1	0	0	28.63	126.5	75.25	150	6.49	362	5.5	6	11	15	44.7	6.4	1.1	86	10.1	4.46	140	6.04	1.94	4.85	1	0
1	59	2	1	1	0	0	0	0	180	86.4	86	96	0.89	0	0	0	2	1	0	0	26.66	124	66.5	144	4.59	218	5.8	5.6	58	39	44.5	11.91	1.81	75	6.07	4.42	140.5	4.13	0.75	2.84	1.09	0
0	59	3	1	1	0	0	0	40	156	52.2	67	78	0.86	0	0	0	2	1	0	0	21.445	124.25	73.5	146	7.96	261	5.6	7.5	19	21	51.3	11.18	1.8	51	2.53	4.11	138	5.46	2.08	3.65	1.15	0
0	59	3	1	1	0	0	0	30	166	64.2	76	88	0.86	0	0	0	2	1	0	0	23.29	134	83	143	4.6	242	6.4	6.2	31.56	24	44	8.9	0.7	55.4	4.75	3.8	142.4	5.07	2.73	2.86	1.1	0
0	59	3	1	1	0	0	0	20	163	59.7	82	90	0.91	0	0	0	2	1	0	0	22.46	125.5	75	118	5.16	250	5.3	5.9	14	19	45	11.1	1.7	64.12	3.67	4.2	141	5.61	1.73	2.82	1.86	0
0	59	2	0	1	1	0	1	60	154	53.7	78.5	87	0.9	0	0	0	2	1	0	2	22.635	124.5	75.25	133	4.98	281	5.2	6.1	14	23	45.06	9.48	1.39	70.9	4.18	3.98	142.4	5.68	1.26	2.95	2.15	0
1	59	3	1	1	1	0	0	0	170	72	88	100	0.88	0	0	0	0	1	3	2	24.91	124	73	153	5.51	167	5.3	5.2	22.91	25	45.9	7.2	1.6	117.3	7.41	4.74	141	3.16	0.61	1.48	1.3	0
1	59	3	1	1	0	0	0	30	175	79	86	94	0.91	0	0	0	2	1	5	0	25.79	123.5	75.5	131	5.16	205	5.3	6	23	23.48	43.6	7.5	1.78	86	6.56	5.06	141.6	5.44	1.01	4.73	1.09	0
1	59	2	0	1	0	0	0	20	165	65	85	93	0.91	0	0	0	2	1	0	0	23.87	137	85.5	135	7.39	170	5.6	6.9	22	30	42.5	12.3	2	58	4.8	3.69	141.6	3.88	1.37	2.7	0.81	0
0	59	2	1	1	1	0	0	20	158	61.4	75	92	0.81	0	0	0	1	1	0	0	24.59	122.75	74.75	151	3.98	234	5.2	5.5	38	19	45.33	12.1	1.3	77.8	6	4.6	142	4.57	2.61	2.3	1.2	0
1	59	2	1	1	1	0	0	30	170	92.2	93	105	0.89	0	0	0	1	0	0	0	31.895	127.75	78.5	150	5.4	195	5.6	6.2	19	18.73	44.8	11	1.72	96.9	6.96	4.25	140.2	6.84	2.43	5.34	0.88	0
0	59	3	1	1	0	0	0	30	168.3	65	78	90	0.87	0	0	0	1	1	0	0	22.94	131.5	81.5	150	4.17	230	5.6	6.1	29	30	48.4	10.65	1.6	84	5.55	4.44	141.7	6.95	1.74	4.82	1.74	0
0	59	2	1	1	0	0	0	60	154	55.6	77	86	0.9	0	0	0	1	1	0	0	23.44	122.5	75	123	4.56	256	6.3	8	29	24	46.1	6.7	1.32	73.9	5.75	4.44	140	4.51	1.33	2.84	1.53	0
1	59	3	1	1	0	0	0	20	180	85	89	94	0.94	0	0	0	2	1	0	1	26.23	119	73.5	160	4.92	197	5.2	6.5	37	36	49	15.55	2.4	68.5	6.04	4.19	139	4.5	1.39	2.17	1.41	0
1	59	2	0	1	0	0	0	40	170	62	79	88	0.9	0	0	0	1	1	0	0	21.985	124	76.25	155	5.02	236	5.2	5.9	22	16	45.33	12.36	2.2	61.19	4.77	4.07	139	6.19	0.85	4.51	1.39	0
1	59	2	1	1	0	0	0	30	170	65.7	87	96	0.91	0	0	0	1	0	0	0	22.73	125.5	73	177	4.64	192	5.6	5.4	31	24	49.8	13.3	1.26	92	5.37	4.2	140.4	5.56	1.78	4.32	0.88	0
1	59	2	1	1	0	0	0	20	179	65.7	86	101	0.85	0	0	0	1	1	0	0	20.5	124.5	74.5	136	8.02	221	6.3	6.6	9	21	44.46	30.17	11.7	89.3	4.34	4.66	137	5.29	0.91	2.91	2.32	0
0	59	3	1	1	0	0	0	30	158	60	85	95	0.89	0	0	0	2	1	0	0	24.03	124.5	76.5	137	6.57	544	5.4	5.8	9	17	46.1	7.5	1.4	76.1	2.78	3.98	139.4	7.64	2.91	4.96	1.59	0
1	59	2	1	1	0	0	0	0	165	79.8	87	98	0.88	0	0	0	2	1	0	2	29.31	121	74	163	5.63	157	5.6	5.6	27.51	41	43.9	72.6	11.7	70	4.5	3.82	137.4	3.52	1.73	1.48	1.46	0
1	59	2	1	1	0	0	0	30	163.8	68.5	86	98	0.87	0	0	0	1	0	3	0	25.525	124.75	73.25	141	4.47	164	5.5	6.2	40	30	43.1	12.06	1.37	84.8	4.12	4.32	133.4	4.83	1.07	2.94	1.45	0
0	59	2	0	1	0	0	1	0	170	60	72	86	0.83	0	0	0	0	1	0	0	20.76	124.5	75	143	8.7	371	5.6	5.7	16	18	47.7	6.7	1.8	60.7	7.11	4.4	140.4	4.41	1.01	2.48	1.53	0
0	59	3	1	1	1	0	0	0	165	64.8	84	96	0.87	0	0	0	2	1	0	0	23.8	121	79	130	4.48	265	5.3	6	13	16	45.8	10.63	1.39	52.8	5.62	4.01	138.5	4.64	1.77	2.54	1.46	0
1	59	2	0	1	0	0	0	30	168	64.45	84	94	0.89	0	0	0	1	1	0	0	22.83	124.5	76	155	3.28	181	5.4	6.3	31	30	45.6	23.33	3.87	65.5	6.13	4	139.5	4.63	0.78	2.97	1.19	0
1	59	2	1	1	0	0	0	20	178	72.05	80	90	0.88	0	0	0	1	0	0	0	20.795	123.75	74.5	157	5.47	126	6.1	5.8	16	16	48	10.49	2.5	69	6.63	4.21	133.1	4.89	0.55	3.01	1.44	0
0	59	3	1	1	0	0	0	0	156	47.2	78	89	0.87	0	0	0	2	1	0	0	19.39	121	79	115	6.49	235	5.4	6.5	16	26	48	13.47	2.9	67	7.32	4.12	120	5.45	1.21	2.89	1.88	0
0	59	3	1	1	0	0	0	60	154	54.3	73	89	0.82	0	0	0	1	1	0	0	22.89	129.5	76.75	134	7.21	227	5.3	6.2	13	20	48.8	11.1	1.8	73.8	4.46	4.16	141.7	8.55	2.92	5.69	1.62	0
1	59	2	1	1	1	0	0	30	160	70.8	88	96	0.91	0	0	0	2	0	2	0	27.65	124.5	74.5	168	5.81	237	6.1	8	19	23.71	49.8	12.36	1.8	71	6.66	4.28	139.8	6.66	1.74	4.42	1.27	0
0	59	3	1	1	1	0	0	30	160	57.15	72	85	0.84	0	0	0	1	1	0	0	22.32	124.5	80	112	5.6	156	5.3	5.9	38	17	46.6	12.81	2.3	62	7.07	4.02	140.8	3.16	1.47	1.46	1.07	0
1	59	3	0	1	0	0	0	30	172	74.6	83	88	0.94	0	0	0	1	1	0	0	25.21	126	72.5	173	5.38	194	5.5	6	109	79	46	28.13	4.1	75	3.3	4.21	143.3	3.37	1.3	1.76	1.22	0
1	59	2	1	1	0	0	0	30	162	70.7	78	92	0.85	0	0	0	2	1	8	0	26.935	124.75	75.25	159	5.8	169	5.6	6	26	23	45.8	24.36	3.56	96	7.85	4.38	137.4	5.82	1.25	3.74	1.57	0
1	59	3	1	1	0	0	0	30	170	68.5	80	98	0.81	0	0	0	2	1	0	0	23.7	123	74.5	150	6.29	255	5.6	6.1	14	43	48.4	14.7	2.7	73.1	4.66	3.96	133.1	5.87	1.02	4.02	1.48	0
1	59	3	1	1	1	0	0	30	175	81.4	89	92	0.96	0	0	0	1	1	0	0	23	126.5	77.75	129	8.41	258	6.2	6.8	8	18	43.3	10.26	3.48	70.85	5.02	3.53	138.4	2.54	1.7	0.75	1.1	0
0	59	3	1	1	1	0	0	60	163	58.45	83	96	0.86	0	0	0	2	1	0	0	21.99	126.5	76	141	3.77	234	6.1	5.8	13	15.74	45.2	11.87	1.2	63.14	5.58	3.74	142.4	4.11	1.28	2.07	1.53	0
1	59	2	0	1	0	0	0	30	174	66.7	90.5	95	0.95	0	0	0	1	1	0.5	0	22.025	125.25	75.5	149	6.42	221	6.1	6.6	27	23	51.4	13.2	1.71	72	5.47	4.22	140.6	3.01	0.79	1.43	1.08	0
1	59	2	1	1	0	0	0	30	174	78.7	87	100	0.87	0	0	0	2	1	5	2	25.99	123.5	76.5	142	6.92	197	5.4	4.1	27	21	45.1	13.77	1.73	91.1	5.93	4.42	140.6	4.21	2.12	2.21	1.06	0
1	59	2	1	1	0	0	0	30	172.8	75.45	89	104	0.86	0	0	0	1	1	3	1	25.26	123.25	75.5	145	6.64	212	5.4	5.7	38	29	45.4	12.5	1.8	66.8	4.5	4.6	139.7	5.32	1.14	4.06	1	0
0	59	2	1	1	0	0	0	0	160	68.2	86	87	0.99	0	0	0	1	1	0	0	26.635	125	73.25	127	4.9	291	6.2	6.3	14	18	45.5	7.2	1.8	72	4.98	4.76	138.7	5.86	2.51	3.74	1.38	0
0	59	2	1	1	0	0	0	60	160	61	79	95	0.83	0	0	0	2	1	0	0	23.82	129	72.5	147	4.48	290	5.3	6.1	46	31	50.1	8.59	1.4	75	6.29	4.27	139.4	7	2.12	5.06	1.24	0
0	59	2	1	1	0	0	0	30	168	58.5	78	92	0.85	0	0	0	1	1	0	0	20.72	123.5	72	132	4.52	282	5.3	5.4	14	19.11	44	6.4	1.7	51.4	5.03	4.03	138.7	5.63	0.49	3.92	1.57	0
0	59	2	1	1	0	0	0	30	156	66.5	82	100	0.82	0	0	0	1	1	0	0	27.325	129.25	71.75	141	4.92	233	6	7	37	27	46.8	13.26	4.33	46	5.35	4.86	140.5	5.69	1.06	2.55	1.56	0
1	59	2	1	1	0	0	0	30	160	70	90	92	0.97	0	0	0	2	1	0	0	27.34	120.5	71	135	4.98	234	5.6	6.9	27	26	45.7	17.2	2.7	137.6	7.65	4.98	138.7	3.25	1.12	1.45	1.1	0
0	59	3	1	1	1	0	0	0	162	63.8	76	96	0.79	0	0	0	2	0	0	0	20.27	124	74.5	142	5.16	369	5.2	6.4	48	31	44.6	9.82	1.1	58.2	6.56	3.69	141.7	6	1.61	3.34	1.96	0
0	59	2	1	1	0	0	0	50	158	63	84	95	0.88	0	0	0	1	1	0	0	25.23	132.5	78.5	144	6.46	321	6.3	5.9	18	18	49.1	13.14	1.4	55	3.56	4.6	139.9	6.71	2.72	4.93	1.15	0
1	59	2	1	1	0	0	0	30	168.4	70.35	83	97	0.85	0	0	0	1	1	0	0	24.8	127.75	75	149	5.66	151	5.4	6.1	18	24	48.5	14.5	2	89	5.19	4.75	139	3.56	0.46	2.11	1.35	0
1	59	3	1	1	0	0	0	0	168	71.8	90	100	0.9	0	0	0	0	1	0	0	25.43	137	82.5	161	5.14	219	5.3	6.2	52	36	48.36	11.25	3	74.8	4.66	3.67	140.4	6.17	2.07	4.44	0.94	0
1	59	2	1	1	0	0	0	60	165	60.7	85	90	0.94	0	0	0	1	1	0	0	22.29	121.5	73.5	166	4.61	210	6.6	6.4	32	17	46.6	14.42	3.08	72.7	3.95	4.03	138.9	5.14	1.96	3.2	1.13	0
0	59	3	1	1	1	0	0	30	163	62.2	79	86	0.92	0	0	0	1	1	0	0	23.41	127	78	124	5.94	237	6.4	5.8	21.7	20.92	47.34	14.8	1.4	79.7	5.48	4.75	140.1	3	0.95	1.31	1.34	0
1	59	2	1	1	0	0	0	30	175	83.35	84	95	0.88	0	0	0	1	1	0	0	27.215	123.5	78.75	135	10.48	230	5.3	6.7	63	38	46.9	23.6	6.84	85.4	4.63	4.27	139	4.07	2.56	1.92	1.13	0
1	59	2	1	1	0	0	0	40	172	67.7	83	94	0.88	0	0	0	1	1	0	0	22.88	124.5	74	155	5.14	127	6.4	6.3	24	18.7	49.2	12	1.8	83.6	6.45	4.21	135.8	6.26	0.96	4.89	1.14	0
1	59	2	0	1	0	0	0	0	167	64.7	93	103	0.9	0	0	0	0	1	5	0	23.19	124.5	75	155	8.03	169	5.6	6.2	33	23	47.7	22.7	5.93	54	5.21	4.18	138.5	4.85	0.88	3.4	1.28	0
0	59	3	1	1	0	0	0	30	160	76.05	86	96	0.89	0	0	0	2	1	0	0	29.705	129.25	79.25	138	5.38	277	6	5.8	19	24	47.79	5.6	1.7	85	6.32	4.28	141.2	3.92	1.01	2.25	1.11	0
1	59	3	1	1	0	0	0	30	170	75.6	85	89	0.96	0	0	0	2	1	4	1	26.15	122.5	75	158	6.75	194	6	7.3	27	26	48.4	16.8	3.1	56.2	3.34	4.21	139.9	4.35	1.31	2.78	1.78	0
0	59	2	1	1	0	0	0	20	154	69.55	97	107	0.91	0	0	0	1	1	0	0	27.255	125.5	77.5	135	6.23	269	5.6	8	45	29	48.4	8.41	2.08	79	7.13	3.44	137.8	5.29	1.13	2.86	1.63	0
1	59	3	1	1	1	0	0	30	180	90	96	107	0.89	0	0	0	2	0	4	0	27.77	129.5	77.5	153	7.49	148	5.3	5.9	12.28	14	42.9	8.27	1.8	79.9	5.12	3.73	140.6	3.83	1.46	2.14	0.81	0
0	59	2	1	1	1	0	0	30	153	55.4	84	92	0.91	0	0	0	2	1	0	0	23.66	124.5	76.5	145	8.63	317	5.8	5.8	39	32	44.1	19.59	2.9	69	7.49	4.38	141.5	5.03	1.73	2.41	1.52	0
1	59	2	1	1	0	0	0	30	165	74.85	82	95	0.86	0	0	0	1	1	7	1	27.49	131.5	75	161	6.69	282	5.6	6.2	54	43	51.4	10.7	1.9	60.39	5.21	4.57	136.9	4.64	1.12	3.46	1.16	0
0	59	3	0	1	1	0	0	60	160	54.2	82	94	0.87	0	0	0	1	1	0	0	21.165	124.25	73.5	137	4.29	205	5.9	5.9	41	30	47.34	11.41	1.4	36	5.24	4.08	141	6.46	1.97	3.98	1.71	0
1	59	2	1	1	0	0	0	50	169	67.65	81	97	0.84	0	0	0	1	1	3	1	23.68	125.5	76.25	157	6.61	256	5.7	5.6	18	24	46.8	13.91	2.6	66.35	4.54	4.32	139.1	4.45	0.95	3.18	0.84	0
1	59	2	1	1	0	0	0	30	175	95.3	96	99	0.97	0	0	0	1	1	20	1	31.11	123	73.5	165	5.45	186	5.6	5.3	41	27	47.7	12.5	3.64	62.4	5.42	4.32	140.6	4.67	1.78	2.96	1.14	0
0	59	2	1	1	1	0	0	30	156	56.5	80	89	0.89	0	0	0	1	1	0	0	23.21	128	77	131	4.96	255	5.6	5.8	21	23	47	10.8	0.68	59.5	2.7	3.69	140.7	6.11	1.11	3.57	2.03	0
1	59	2	0	1	0	0	0	40	172	85	86	110	0.78	0	0	0	2	1	0	0	28.73	121	81	147	4.32	160	5.6	5.6	31.56	28	44.8	15.63	2.5	71.4	3.49	2.81	139.7	6.15	1.14	3.88	1.48	0
0	59	3	1	1	0	0	0	30	158	58.85	82	91	0.9	0	0	0	1	1	0	0	23.57	124.25	75	134	6.54	189	5.5	5.8	11	16	49	7.44	1.2	53	5.57	4.64	138.3	6.17	1.38	3.9	1.31	0
0	59	2	1	1	0	0	0	30	158	55.35	78	88	0.88	0	0	0	2	1	0	0	22.17	124	73.5	136	6.35	216	5.4	5.8	16	19	42	5.7	1.9	48	3.48	2.81	137.7	4.15	2.24	1.52	1.64	0
1	59	3	1	1	0	0	0	30	175	70.45	83	100	0.83	0	0	0	1	1	0	0	23	126.5	78.25	154	6.42	241	5.6	6.4	13	21	47.7	17.24	2.66	47	4.3	4.21	138.4	4.29	0.69	3.49	1.07	0
1	59	2	0	1	0	0	0	20	172	66	84	95	0.88	0	0	0	2	1	6	2	22.3	123	75	157	5.46	259	5.3	6.8	6	18	47.9	9.48	2.79	83.2	4.67	4.36	139	4.95	2.21	2.43	1.48	0
1	59	2	0	1	0	0	0	30	164	71.85	88	98	0.9	0	0	0	2	1	10	1	26.71	125.5	75.75	159	6.69	303	6.6	5.8	22	20	48.5	10.12	1.36	68	4.66	4.7	138	6.14	0.81	4.59	1.47	0
1	59	2	1	1	0	0	0	30	180	84.15	85	97	0.88	0	0	0	1	1	0	0	25.965	125.25	74.5	168	7.02	208	6.4	5.8	31	26	49	13.55	1.4	76.5	6.07	4	135.9	5.6	1.42	3.39	1.22	0
1	59	2	0	1	0	0	0	40	173	54.55	76	85	0.89	0	0	0	1	1	13	1	18.22	127.5	74.5	139	6.05	257	5.6	6.7	13	27	49.8	7	2.07	65.9	5.33	4.66	133	4.28	1.24	2.2	1.56	0
1	59	2	0	1	0	0	0	40	171	79.5	91	99	0.92	0	0	0	1	1	8	1	27.18	128	75	144	5.52	195	6.2	6.2	16	15	43.6	9.58	2.5	82.2	6.05	4.47	140.1	2.57	1.45	2.52	0.72	0
1	59	2	1	1	1	0	1	30	166.4	84	101	109	0.92	0	0	0	2	0	20	0	30.33	124.5	77	154	6.62	217	6.1	6.3	23	24	46.5	12.74	2.2	80	5.11	4.23	133.6	4.73	1.21	2.79	1.13	0
0	59	3	1	1	0	0	0	20	160	58.2	85	95	0.89	0	0	0	2	1	0	0	22.73	115	74.5	151	4.99	291	5.3	5.8	14	17	51.7	15.5	1.7	45	4.01	4.11	139	7.43	3.24	4.34	1.12	0
0	59	2	1	1	0	0	0	0	162	60	86	99	0.86	0	0	0	0	1	0	0	22.86	121.5	102.5	138	3.72	406	5.6	5.8	19	27	47.4	20.9	6.14	44	16	4.4	138.8	4.94	0.99	2.72	1.84	0
1	59	2	0	1	0	0	0	0	170	80	90	100	0.9	0	0	0	0	1	0	1	27.68	121.5	70.5	146	5.01	200	5.6	7.2	37	25	46.2	10.09	2.8	80	8.96	4.55	142.9	5.6	2.54	4.5	0.91	0
1	59	2	0	1	0	0	0	30	162	70.85	85	92	0.92	0	0	0	2	1	0	0	26.995	126.5	76.5	152	6.74	151	5.7	5.5	12	17	49.2	8.8	1.26	78	6.06	4.58	138.5	4.35	0.66	3.12	1.03	0
1	59	2	1	1	0	0	0	45	167	80.15	92	95	0.97	0	0	0	1	1	0	0	28.735	125.5	75.25	153	6.93	187	5.3	6	31	18.7	43.2	7.9	1.3	53.7	5.82	4	140.1	4.97	2.46	3.36	1.08	0
0	59	2	1	0	0	0	0	0	160	70	80	90	0.88	0	0	0	0	1	0	0	27.34	124.75	74.75	140	5.38	318	5.7	6.4	22	17	43.5	10.7	1.56	72.9	4.52	4.72	137.5	6.43	1.95	4.97	1.22	0
1	59	2	1	1	0	0	0	20	176	93	88	92	0.95	0	0	0	2	1	2	0	30.02	126.5	73	155	6.85	147	5.3	6.5	16	19	47	9.74	1.6	71.7	5.71	4.46	138.6	5.74	3.16	3.7	0.94	0
1	59	2	0	1	0	0	0	0	172	79.8	90	102	0.88	0	0	0	2	1	0	1	26.97	128	77.5	136	5.33	276	5.9	6.1	22	23	46.5	14.32	4.28	96	4.7	4.06	140.3	5.7	1.46	3.57	1.34	0
1	59	3	1	1	0	0	0	20	170	75	92	101	0.91	0	0	0	2	1	6	1	25.95	121	82	157	7.93	268	5.1	5.8	45	55.4	49.9	18.6	6.42	119.3	7.09	4.63	142.6	5.67	1.9	3.51	1.61	0
0	59	2	1	1	0	0	0	40	153	53.4	76	85	0.89	0	0	0	1	1	0	0	22.81	126.5	75.25	137	6.59	220	5.7	6.2	12	17	44.8	11.6	2.71	55.4	5.18	4.15	145.27	5.59	4.11	3.23	0.98	0
0	59	3	1	1	0	0	0	20	152	56.3	79	80	0.99	0	0	0	1	1	0	0	24.36	129.25	78	145	4.28	261	6.2	6.5	45	33	48.7	10.93	1.9	56	5.47	4.21	139.5	5.6	2.52	3.2	1.23	0
1	60	2	1	1	0	0	0	30	170	90	98	110	0.89	0	0	0	2	1	0	0	31.14	131	72	150	6.6	124	5.6	6.5	29	17	43.7	8.57	1.9	79.1	6.17	2.81	140.2	4.79	1.34	3.39	0.97	0
1	60	2	1	1	0	0	1	30	170	65	95	96	0.98	0	0	0	1	0	0	0	22.49	131	74.25	162	6.76	197	6	4.5	77	55	45.2	18.9	1.97	71.36	7.4	4.86	139.1	5.83	1.01	4.62	1.19	0
1	60	2	1	1	0	0	0	0	182	79.2	85.5	96	0.89	0	0	0	2	1	0	1	23.91	126.5	74.5	149	4.97	186	5.6	5.8	44	36	46.05	16.25	2.1	64.42	3.62	3.82	140.4	4.21	0.56	1.51	1.89	0
0	60	3	1	1	0	0	0	60	156	60.7	88	96	0.91	0	0	0	2	0	0	0	24.94	126	75.5	124	8.92	266	5.8	6.1	14	23	47	7.4	2.56	61	3.51	4.26	139.8	3.68	2.16	1.55	1.25	0
1	60	3	0	1	0	0	0	40	173	80.3	75	83	0.9	0	0	0	1	1	7	2	26.825	126.5	70.75	141	9.05	249	6	6.2	10	16	47.8	9.35	5.3	53.7	4.21	4.47	138.5	4.22	0.55	2.8	1.22	0
0	60	3	1	1	0	0	0	0	160	63.1	85	95	0.89	0	0	0	0	1	0	0	24.64	126	77.5	133	4.87	250	5.4	5.9	17	22	46.28	13.75	2.5	36	7.14	4.85	133.4	4.76	1.63	2.34	1.02	0
1	60	2	1	1	0	0	0	30	172	78.65	100	110	0.9	0	0	0	1	1	20	1	26.58	125	75.75	141	9.57	299	5.6	6.4	22	22	40.9	17.3	2.7	84.8	5.34	4.33	140.4	4.79	0.64	3.33	1.19	0
1	60	2	1	1	0	0	0	30	168	65.8	84	90	0.93	0	0	0	1	1	0	0	23.31	131.75	75.25	136	3.92	147	5.4	6.2	11	20	49.2	13	2.1	116	5.54	4.73	136	3.74	2.19	1.88	0.81	0
1	60	2	1	1	0	0	0	30	180	75.6	84	96	0.88	0	0	0	1	1	8	1	23.33	125.5	74.25	147	5.02	168	5.6	6.4	14	19	51.7	16.87	3.1	65.8	4.83	4.21	143	5.24	0.95	3.17	1.93	0
0	60	2	0	1	0	0	1	0	162	65.1	86	100	0.86	0	0	0	0	1	0	0	24.8	124.5	74.5	140	7.39	221	5.7	5.8	33	33	47.2	10.7	2.25	45.2	5.77	3.8	137	5.28	2.13	2.91	1.28	0
1	60	2	1	1	0	0	0	30	168	67.9	86	96	0.9	0	0	0	2	1	0	0	24.05	129.25	75.25	155	5.72	156	6	6	30	25	46.1	16.11	2.28	96	6.02	4.29	142	4.22	0.87	2.99	1.1	0
1	60	2	0	1	0	0	0	30	182	83.85	86	101	0.85	0	0	0	2	1	0	0	25.305	123.25	67.25	131	5.48	187	6	6.2	34	28.41	45.3	18.79	2.7	85.8	3.8	3.72	139.1	3.62	1.78	1.79	0.79	0
0	60	2	1	1	0	0	0	0	162	67.25	85	95	0.89	0	0	0	0	1	0	0	25.62	123.5	74.25	123	4.34	308	5.7	5.4	39	30	45.1	13.08	5.76	60	5.56	4.74	140.4	5.11	0.87	3.39	1.6	0
1	60	2	0	1	0	0	0	30	165	62.65	83	91	0.91	0	0	0	1	1	0	0	23.005	125.5	74.5	135	6.75	217	6.2	7	13.31	19	45.5	19.14	2.75	71.4	8.17	3.91	136.7	5.17	1.27	3.51	1.43	0
1	60	3	1	1	1	0	0	20	164	68.6	78	88	0.88	0	0	0	1	1	3	1	25.5	124.25	74.5	143	5.8	183	6.2	5.8	13	20	45.5	10	1.2	60.1	4.77	3.69	138.8	4.05	1.73	1.94	0.95	0
1	60	3	1	1	0	0	0	30	173	74	90	103	0.87	0	0	0	2	1	0	0	24.72	124.5	73.5	148	5.41	237	5.7	5.6	22	16	46.3	11.9	1.9	68	6.4	3.44	136.9	5.28	1.54	3.65	0.85	0
1	60	3	1	1	0	0	0	30	173	72	82	94	0.87	0	0	0	2	1	0	0	24.05	123	79	153	3.91	168	5.3	5.7	24	24.26	48.4	14.5	2.58	112	5.17	4.38	139.9	3.91	0.71	2.88	1.19	0
1	60	2	1	1	0	0	0	60	174	99	96	112	0.85	0	0	0	2	1	0	0	32.69	124.5	76.5	154	8.31	163	5.9	5.7	20	19	47.9	17.53	4.31	83	4.38	4	139.5	4.35	1.01	2.41	1.58	0
1	60	2	1	1	0	0	0	0	178	90	92	101	0.91	0	0	0	0	1	0	0	28.4	127	76.5	169	3.77	219	6	7.2	38	38	49	24.36	7.57	115.4	6.09	4.29	139.5	5.37	0.79	4.14	1.43	0
0	60	2	0	1	1	0	0	30	162	66.3	80	93	0.86	0	0	0	1	1	0	0	25.26	121.5	75.5	135	6.31	126	5.9	6.3	17	28	46.3	16.43	2.35	56	3.81	3.73	138	5.17	1.17	2.75	1.58	0
0	60	2	1	1	0	0	0	60	163	81.85	88	97	0.91	0	0	0	1	1	0	0	30.8	125	76.5	137	5.26	157	5.4	6	13	17	43.1	11.2	1.86	74.1	5.81	4.16	140.6	4.4	0.76	2.7	1.26	0
1	60	2	1	1	0	0	0	0	179	92	108	114	0.95	0	0	0	0	1	8	0	31.705	125.75	74.5	146	4.3	301	5.7	6	13	15	47.9	7.3	1.85	87	5.47	4.86	139.8	2.74	1.89	1.22	0.92	0
1	60	3	1	1	0	0	0	30	174	80	87	99	0.87	0	0	0	2	1	0	1	26.42	125	71	156	5.74	159	5.8	6.3	30	21	47.8	7.9	1.2	72.9	4.3	4.05	138.9	6.78	0.88	4.91	1.61	0
1	60	2	0	1	0	0	0	30	175	60.7	74	78	0.95	0	0	0	1	1	0	0	19.82	125.5	78	150	5.72	180	6.7	6.4	27	25	46.6	21.67	5.35	60	3.98	4.09	138	3.74	1.26	1.62	1.47	0
0	60	3	1	1	0	0	0	40	160	59.7	77	95	0.81	0	0	0	1	1	0	0	23.32	124	76.5	127	6.15	265	5.5	6.1	20	21.49	48.1	10	1.43	50.3	3.9	4	141.5	5.46	1.32	3.78	1.25	0
0	60	2	1	1	0	0	0	20	160	68.8	84	97	0.87	0	0	0	1	1	0	0	26.87	129.25	74.75	156	8.56	272	6.3	6.3	20	23	44.7	8	2.2	71	5.77	4.3	142	7.17	5.76	4.42	0.96	0
1	60	2	0	1	0	0	0	0	173	70.4	80	85	0.94	0	0	0	0	1	0	0	23.52	121	67.5	166	4.67	170	5.9	5.5	13.17	16	44.7	22.97	5.93	58.8	5.16	4.46	136	2.9	0.88	1.77	1.32	0
0	60	2	1	1	1	0	0	30	160	53.45	70	88	0.795	0	0	0	1	1	0	0	20.87	127	75.25	154	7.23	207	5.5	6.6	31	25	48.36	10.5	1.8	47.3	4.38	4.46	140	5.36	0.96	3.75	1.17	0
0	60	2	1	1	0	0	0	0	160	58.2	77	93	0.82	0	0	0	0	1	0	0	22.73	121	74	158	10.79	206	5.4	6.6	54	39.38	48.36	15.7	3	60.94	8.59	4.19	140.6	6.43	2.05	4.25	1.53	0
1	60	3	1	1	1	0	0	20	170	67.7	70	83	0.84	0	0	0	1	1	0	0	23.42	123.25	66.25	132	5.41	147	6.5	7.1	18	19	46.1	3.2	1.4	124.3	9.1	4.41	136.3	6.83	0.69	4.76	1.53	0
0	60	2	1	1	0	0	0	30	165	68.8	89	90	0.98	0	0	0	1	1	0	0	25.27	125.5	74	121	6.56	183	5.7	5.9	26	25	47.5	13.9	2	54.5	5.74	4.19	139.9	4.22	1.27	2.57	1.2	0
1	60	3	1	1	0	0	0	30	182	90.3	80	95	0.84	0	0	0	2	1	3	1	27.26	124.5	73.5	151	6.15	23	5.4	5.4	35.41	34	42.1	14.4	3.4	89	4.78	3.69	140	3.8	1.04	1.8	1.22	0
1	60	2	1	1	0	0	0	30	163.9	54.15	76	88	0.93	0	0	0	1	1	20	1	20.155	122.25	75.75	137	6.28	290	6.2	7.8	36	22	43.7	9.96	1.8	55.4	4.7	4.22	138.6	4.3	2.11	3	0.95	0
1	60	3	1	1	0	0	0	30	178	75.7	78	89	0.87	0	0	0	2	1	0	0	23.89	122	74.5	164	8.07	258	5.9	6.4	12	19	48.4	8.17	1.63	87.2	6.12	4.42	138.9	6.23	1.81	4.41	1.37	0
0	60	3	1	1	0	0	0	0	158	53.2	76	86	0.88	0	0	0	1	1	0	0	21.31	126.5	75.5	133	6.15	200	5.3	6.7	20	29	46.28	25.55	6.61	60	4.69	3.72	142.2	3.76	1.39	1.61	1.64	0
0	60	2	1	1	0	0	0	60	165	69.85	85	100	0.85	0	0	0	1	1	0	0	25.65	129.5	76.5	145	6.37	173	5.7	5.6	25	27.34	45.2	11.7	2.78	70	6.2	4.32	140	6.36	1.7	4.01	1.67	0
0	60	2	1	1	0	0	0	30	160	60	83	96	0.86	0	0	0	1	1	0	0	23.43	120.5	71	124	6.21	315	5.1	6.6	13	21	45.5	1.06	1.3	63.8	3.62	4.78	139	6.47	1.54	3.64	2.08	0
1	60	2	1	1	1	0	0	30	170	74.2	85	92	0.92	0	0	0	1	1	0	0	25.67	123.5	76	148	4.64	195	5.4	5.6	21	23	45.06	14.9	1.3	62	5.61	4.21	138.2	6.1	1.34	4.49	1.24	0
1	60	2	1	1	0	0	0	0	184	74.8	86	92	0.93	0	0	0	2	1	0	0	22.09	121	69	150	4.22	180	5.1	5.7	39	26	45.2	14.9	1.8	59	2.78	2.81	139.7	3.26	3.11	2.88	1.36	0
0	60	3	1	1	1	0	0	30	160	62.7	88	100	0.88	0	0	0	2	0	0	0	24.49	121.5	73.5	127	4.83	172	5.3	6.1	19	19	50.6	11.26	1.7	34	5.38	4.76	140.5	5.5	1.41	3.43	2.09	0
1	60	3	1	1	0	0	0	60	178	70	74	80	0.92	0	0	0	2	1	0	0	22.09	126.5	70.5	155	4.35	245	5.9	6.1	17	14	47.9	10.46	1.7	63.6	5.23	4.23	133.3	7.55	1.42	5.45	1.22	0
1	60	3	1	1	0	0	0	0	176	91.75	93	105	0.89	0	0	0	1	1	20	0	29.615	125.5	74.5	156	4.75	244	5.4	5.8	15	23	44.2	20.86	4.2	69	6.19	4.75	125.9	4.53	1.02	3.27	0.95	0
1	60	2	1	1	0	0	0	20	165	58.8	78	87	0.9	0	0	0	1	1	0	0	21.59	127	73.5	137	8.86	198	6.2	6.6	11	15	43.5	9.73	2.47	83.3	7.63	5.05	142.2	4.87	0.67	3.6	1.49	0
1	60	3	1	1	0	0	0	0	175	73	89	95	0.93	0	0	0	0	1	0	0	23.83	121	72.5	144	6.64	148	5.7	6.2	23	22	44.5	19.7	3.11	114	7.83	3.95	138.8	2.52	1.28	1.2	1.41	0
0	60	3	0	1	0	0	0	0	170	65.2	86	94	0.91	0	0	0	2	1	0	0	22.56	121	82.5	146	8.99	254	5.3	5.9	24	21	48.1	5.4	1.7	59	4.59	4.39	138.7	7.31	1.72	5.19	1.3	0
1	60	2	1	1	0	0	0	0	175	83	89.5	95	0.87	0	0	0	0	1	0	0	27.1	129	77.5	139	7.18	197	5.7	6.6	19.03	16	44.6	21	6.53	85	5.17	4.08	138.6	4.27	2.5	2.15	1.13	0
1	60	2	1	1	0	0	0	30	165	70.3	86	91	0.95	0	0	0	1	1	0	0	25.82	126.5	73.5	138	7.87	202	6.3	6.4	62	52	48.2	9.43	2.8	63	6.02	3.72	139.8	2.89	1.72	1.68	0.9	0
0	60	3	1	1	1	0	0	0	140	52.35	81	96	0.84	0	0	0	0	0	0	0	26.705	129.75	78.25	138	6.6	243	5.3	5.8	24	20	48.7	9.1	1.6	76.18	4.85	4.42	139.7	6.85	1.62	4.85	1.49	0
0	60	2	0	1	0	0	0	20	163	58.6	78	90	0.87	0	0	0	1	1	0	0	22.05	126.5	75.5	128	3.71	237	5.8	6.2	25	16	46.1	5.98	1.1	49	4.75	3.65	139.6	4.3	1.29	3.07	1.28	0
0	60	2	1	1	0	0	1	60	158	63.3	84.5	90.5	0.93	0	0	0	1	1	0	0	25.35	131	72.25	136	5.74	300	6.6	7.5	38	25	47.8	11.1	2.2	64	4.56	4.8	139	4.84	1.33	3.29	1.19	0
1	60	2	1	1	0	0	0	20	165	68	80	90	0.88	0	0	0	1	1	0	0	24.97	129	71.5	144	6.38	241	5.7	5.9	36	33	46.3	16.4	3.86	81.3	9.27	4.28	140.6	4.66	0.56	3.26	1.08	0
0	60	3	1	1	0	0	0	30	173	74	88	96	0.91	0	0	0	2	1	0	0	24.72	122	75.5	131	5.4	237	6	6.5	31	22	46.05	10.29	1.4	53.4	5.58	4	140.6	5.72	2.19	3.5	1.25	0
1	60	3	0	1	0	0	0	60	172	70.35	88.5	105	0.845	0	0	0	1	1	0	0	23.775	129.5	81	143	4.44	145	5.7	5.5	17	19	45.3	7.35	1.1	57.1	6.27	4.75	139.8	5.96	1.33	4.01	1.21	0
0	60	2	1	0	0	0	0	0	158	60	75	85	0.88	0	0	0	0	1	0	0	24.03	121	71	139	4.74	269	5.6	6.2	18	19	36.6	6.52	0.7	51.2	4.9	4.27	142	7.32	2.59	4.78	1.3	0
0	60	3	1	1	0	0	0	0	165	53	88	96	0.91	0	0	0	0	1	0	0	19.46	121	72	136	7.79	260	5.7	7.1	8	19	48.36	9.61	1.57	84.3	6.48	4.49	140.8	4.79	1.81	3.01	1.14	0
1	60	3	1	1	0	0	0	60	178	74	89.5	109	0.82	0	0	0	1	1	0	0	23.35	133	76.75	144	5.4	184	5.3	6.1	31	32	48.5	17.97	2.7	96	5.1	3.9	137	5.65	1.1	2.44	2.1	0
0	60	2	1	1	1	0	0	30	160	63.5	77	94.5	0.815	0	0	0	2	1	0	0	24.8	129.75	82.5	125	6.75	233	5.3	5.6	22	19	38.7	6.46	1.4	38	5.32	3.47	141.8	4.59	2.15	2.41	1.39	0
1	60	2	0	1	0	0	0	30	170	66.3	84	93	0.9	0	0	0	1	1	20	2	22.94	123.5	75	157	5.57	223	5.6	5.6	14	25	50.1	13.5	3.64	98	7.74	4.45	140.4	8.57	2.04	5.28	2	0
1	60	3	1	1	0	0	0	50	170	68.6	73	90	0.92	0	0	0	1	1	0	0	23.73	122.25	71.25	134	6.04	261	5.8	5.8	16	19	50	21.6	4.3	81.83	6.72	4.13	137.3	4.7	1.54	2.64	1.41	0
1	60	3	1	1	1	0	0	30	172	85	85	100	0.85	0	0	0	1	0	5	1	28.73	120.5	75.5	169	4.08	202	5.8	6.1	24	17	47.2	10.7	0.67	92	7.96	3.96	142.3	3.94	1.31	2.99	0.69	0
0	60	2	1	1	0	0	0	30	163	63.85	80	95	0.84	0	0	0	1	1	0	0	24.025	126.25	76	135	6.87	143	6.5	6.7	33	32	48.5	10.7	1.9	68	6.05	3.99	136.5	4.99	2.11	2.79	1.35	0
1	60	2	1	1	0	0	0	20	165	69.8	78	92	0.84	0	0	0	2	1	2	1	25.63	119	71	147	7.41	210	5.9	7.1	20	19	42.7	19.5	7.18	67.3	4.72	4.29	135.8	4.83	0.91	2.72	1.75	0
1	60	2	1	1	0	0	0	40	172	78.8	92	98	0.93	0	0	0	1	1	0	0	26.63	123.5	73.5	138	4.82	255	5.3	6.1	19.83	25	45.1	14.1	2.6	109	5.95	4.53	141.4	4.8	0.89	3.13	1.42	0
0	60	2	1	1	0	0	0	30	155	74.7	87	92	0.95	0	0	0	2	1	0	0	31.09	129.5	78	146	6.87	345	6	6.5	18	18	45.9	7.7	1.28	80.24	5.82	5.05	141.3	7.18	2.93	5.36	0.95	0
0	60	3	1	1	1	0	0	40	165	50.2	76	96	0.79	0	0	0	2	0	0	0	18.43	123.5	76.5	131	4.56	230	5.4	5.8	16	22	47.65	11.14	1.63	57	3.64	3.9	137.5	5.79	1.31	3.84	1.31	0
1	60	3	0	1	0	0	1	30	170	63.9	89	96	0.93	0	0	0	1	1	0	0	22.105	127.5	79.5	148	6.55	165	6.5	6.4	21	19	46.6	11.7	2	87	5.03	4.15	140	4.61	1.14	2.93	1.29	0
1	60	2	1	1	0	0	0	30	170	75.6	86	100	0.86	0	0	0	1	1	2.5	0	26.15	124.25	80	131	7.53	243	5.4	7.4	9	14	44.37	5.5	1.7	78.4	4.49	3.92	139.3	3.06	0.99	1.94	0.92	0
1	60	3	1	1	0	0	0	30	170	70	84	96	0.87	0	0	0	2	1	0	0	24.22	120.5	80.5	173	3.9	190	5.8	5.6	36	28	49	20.33	2.58	52.4	6.56	4.55	136.7	5.11	0.53	2.79	1.64	0
1	60	3	1	1	0	0	0	30	185	94	85	96	0.88	0	0	0	2	1	2	0	27.46	126	75	147	6.97	276	5.9	6.4	26	23	46.8	23.5	3.5	60	6.65	2.81	138	5.35	0.74	3.66	1.45	0
1	60	2	1	1	1	0	0	0	174	98	110	122	0.78	0	0	0	0	1	0	0	32.36	125	76.5	152	4.02	189	5.8	6.2	27	16	41.8	10.5	1.73	94	6.05	4.54	141.2	6.97	2.07	5.05	1.24	0
1	60	3	1	1	0	1	0	60	179	85.1	89	100	0.89	0	0	0	1	1	0	0	26.55	134	84.5	158	8.03	255	5.6	6.3	30	20	44.7	21.4	2.7	63.78	2.94	3.94	141.9	4.12	1.25	2.75	0.93	0
1	60	2	1	1	0	0	0	60	178	80	88	103	0.85	0	0	0	1	1	0	0	25.25	125.5	80.5	129	6.25	180	5.3	6.3	27	17	44.5	11.82	2.2	108	5.5	4.57	135.9	3.56	0.66	1.77	1.07	0
1	60	2	1	1	0	0	0	30	160	68.6	86	90	0.96	0	0	0	1	1	0	0	26.795	126.5	79	122	7.34	176	5.4	6.4	21	24	42.2	18.02	3.87	71	6.54	4	139.8	3.13	1.04	2.07	0.84	0
1	60	3	1	1	0	0	0	30	169	54.6	82	90	0.91	0	0	0	2	1	6	0	19.11	133	81	154	5.7	185	5.3	5.7	16	20	47.7	15	2	82	5.76	4.35	140	4.88	1.33	3.03	1.36	0
1	60	2	1	1	0	0	0	30	173	70.75	87	102	0.85	0	0	0	2	1	0	0	23.63	124.25	74.25	150	6.82	245	5.2	6.4	17	23	49.1	8.13	1.6	65	3.96	3.79	130.3	4.69	0.65	3.22	1.17	0
0	60	2	0	1	0	0	0	40	162	61.9	78	97	0.8	0	0	0	1	1	0	0	23.585	124.25	74.5	163	4.68	267	5.4	5.5	12	16	47	14.96	1.9	51	4.01	4.71	137.8	6.24	2.24	4.19	1.14	0
0	60	3	1	1	0	0	0	30	160	50.15	74	80	0.93	0	0	0	2	1	0	0	19.585	123.5	75.5	123	9.33	341	5.5	6.4	20	22	46.2	6.5	1.1	58.3	3.49	3.44	140.1	6.75	1.29	5.01	1.48	0
1	60	3	1	1	0	0	0	60	165	69.2	86	87	0.99	0	0	0	1	1	0	0	25.41	125	75.5	150	4.27	207	6.3	6.4	12	19	44.8	14	2	99	8.27	3.99	140.1	5.39	0.97	3.68	1.22	0
0	60	3	0	1	0	0	0	90	158	55.2	74	86	0.86	0	0	0	2	1	0	0	22.11	126.5	72	139	4.83	249	5.2	5.2	28	22	47.5	9.4	1.7	47	4.39	4.71	141	5.14	1.83	2.55	1.83	0
0	60	3	1	1	0	0	0	20	155	54	76	86	0.88	0	0	0	2	1	0	0	22.47	127.5	80	121	6.63	445	5.4	6.4	17	21	46.9	7.5	2.78	68.6	5.94	4.28	138.7	3.33	0.74	2.02	1.37	0
1	60	2	1	1	0	0	0	30	172	78.1	88	98	0.89	0	0	0	1	1	0	1	26.39	124.5	74.5	145	6.14	258	5.2	6.2	24	21	49.5	10	1.72	103.5	6.17	4.29	138.8	4.86	1.23	3.64	0.96	0
0	60	2	1	1	0	0	0	30	165	58.25	74	82	0.9	0	0	0	1	1	0	0	21.39	123.5	75	134	5.07	185	5.8	5.9	13	23	45.3	7.54	1.57	82	3.77	3.91	140.8	6.36	1.92	3.6	1.53	0
0	60	2	1	2	0	0	0	30	168	55.1	76	82	0.92	0	0	0	2	1	0	0	19.52	129.5	77.5	134	5.19	224	5.7	5.9	6	18	45.2	5.85	1.1	43	6.56	4.71	140.4	4.63	1.61	2.5	1.42	0
1	60	3	1	1	0	0	0	30	182	74.05	87	98	0.89	0	0	0	2	1	0	0	22.355	129.25	75	134	5.54	184	5.3	6	17	18	47.5	14.81	1.89	53	4.14	3.72	135.6	3.31	0.63	2.22	1.01	0
0	60	3	1	1	0	0	0	0	160	64.8	87	93	0.93	0	0	0	2	1	0	0	25.31	129	76.5	154	7.21	286	5.1	5.8	5	18	49.1	8.84	1.3	51	5.24	4.26	138.9	7.11	4.93	3.31	1.39	0
0	60	3	1	1	0	0	0	30	155	52	75	85	0.88	0	0	0	2	1	0	1	21.64	121.5	70.5	127	4.31	242	5.6	6.2	8	21	40.8	10.66	1.31	56.2	5.69	3.79	141.8	6.84	1.89	4.03	1.83	0
0	60	3	1	1	0	0	0	30	154	60.95	88	97	0.91	0	0	0	1	1	0	0	25.695	124.5	71.5	138	4.39	260	5.4	6.3	58	42	46.2	14.26	1.86	54	4.3	4.32	140.5	4.34	1.87	2.63	1.21	0
0	60	3	1	1	0	0	0	30	168	65.65	82	94	0.87	0	0	0	1	1	0	0	23.255	126.5	75.5	141	5.43	211	5.3	5.5	13.82	12	45.9	8.29	1.8	60.5	7.04	4.32	141.9	5.37	1.6	3.4	1.51	0
1	60	3	0	1	0	0	0	30	180	86	92	100	0.92	0	0	0	2	1	0	0	26.54	125	72.5	134	4.43	191	5.6	5.5	13	12	45.8	12.95	1.23	92.63	5.4	3.97	143	4.35	1.01	2.65	1	0
0	60	2	1	1	1	0	0	30	158	61	81.5	88	0.925	0	0	0	2	1	0	0	24.43	133	78.25	136	5.8	253	5.3	6	26.17	21	46.2	9.4	1.3	48	4.93	4.11	137.8	4.84	1.35	2.98	1.13	0
1	60	3	1	1	0	0	0	0	176	90	99	106	0.93	0	0	0	0	1	0	0	29.05	120.5	80.5	165	5.28	173	6	5.5	56	34	49.67	15	3.82	74.6	4.29	3.69	137.8	3.57	1.64	1.96	1	0
0	60	2	1	1	0	0	0	30	163	60.9	83.5	100	0.835	0	0	0	1	1	0	0	22.915	131.5	81.5	132	5.46	188	5.3	6.1	33	27	48.4	10.21	2	70	3.47	3.67	141.5	4.67	1.39	3.15	1.41	0
1	60	3	1	1	0	0	0	30	173	80	86	94	0.91	0	0	0	1	1	0	0	26.72	127	72.5	147	8.42	215	5.6	5.7	47	44.86	45.2	9.2	1.63	68	4.2	3.73	140.4	5.8	2.7	3.54	1.1	0
1	60	2	0	1	0	0	0	50	180	87.4	86	97	0.89	0	0	0	1	1	3	1	26.97	123.5	76.5	142	4.62	158	5.6	6.1	24	26	46.3	17.41	3.59	86.7	7.63	4.92	141.6	4.45	1.73	2.5	1.44	0
0	60	2	1	1	0	0	0	30	167	79.1	93	105	0.89	0	0	0	2	1	0	0	28.355	127.75	76	140	5.18	261	5.3	5.5	19.4	20	36.6	11.4	0.4	62	5.67	3.74	142.4	5.39	1.13	3.45	1.23	0
1	60	2	1	1	0	0	0	60	170	67.3	76	80	0.95	0	0	0	1	1	0	0	23.285	126	76.75	159	4.9	177	5.6	5.1	13	19	48.36	23.6	6.42	64	6.82	4.35	138.2	3.33	0.91	2.14	1.04	0
1	60	3	1	1	0	0	0	30	180	82.5	89	102	0.87	0	0	0	2	1	0	0	25.46	120.5	70.5	141	6.9	174	5.7	5.8	18	17	48.6	13.44	1.65	62.8	5.02	3.73	136.9	5.1	2.28	3.46	1.01	0
0	60	2	1	1	0	0	0	40	163	80.8	90	102	0.88	0	0	0	1	1	0	0	30.435	130.25	74.5	142	7.15	224	6.4	7	62	43	47.5	14.54	1.71	77.5	6.55	4.35	142	4.52	0.6	3.4	1.19	0
1	60	2	1	1	1	0	0	30	156	68.15	99.5	117	0.85	0	0	0	1	1	0	0	28	136.75	81.5	140	9.13	237	5.3	6.3	34	22	45.4	10.09	2.57	67	4.79	3.53	138.6	4.98	2.23	2.5	1.08	0
1	60	2	0	1	0	0	0	50	170	78.6	85	93	0.91	0	0	0	1	1	0	1	27.19	124	73	135	5.9	272	5.6	6.4	15	18	43.9	6.67	2.5	79.3	6.39	4.86	140.6	5.76	1.47	4.15	1.63	0
0	60	3	1	1	0	0	0	0	152	60	86	96	0.89	0	0	0	0	1	0	0	25.96	123.5	72.5	122	6.39	232	5.7	6.3	22	21	45.4	6	1.1	62	4.97	4.72	141.3	6.68	1.86	4.8	1.22	0
1	60	3	0	1	0	0	0	30	170	73.3	92	100	0.92	0	0	0	1	1	15	1	25.36	125	72	144	7.45	214	5.6	5.8	27	26	44.9	19.67	3.05	84.4	5.21	4.39	140.2	4.4	1.13	2.28	1.35	0
0	60	2	1	1	0	0	0	20	152	44	75	89	0.84	0	0	0	2	1	0	0	19.04	125	71	124	4.92	235	5.1	7.1	21	23	45.27	10	2.21	59.5	5.09	3.47	142.12	3.81	0.93	1.87	1.57	0
1	60	2	1	1	0	0	0	0	162	60	76	88	0.86	0	0	0	0	1	0	0	22.86	128	76.5	147	5.73	278	5.8	6	16	20	49.8	11.09	2.31	86.6	5.3	4.86	137	5.89	1.99	4.33	1.06	0
0	60	2	1	1	0	0	0	30	162.95	59.05	77	85	0.91	0	0	0	1	1	0	0	22.23	126.25	75	136	4.92	269	5.6	6.1	11	16	50	12.86	2.9	60	6.99	4.3	140	4.71	1.81	3	1.21	0
0	60	2	0	1	0	0	0	30	160	56	78	88	0.88	0	0	0	2	1	0	0	21.87	135	78.5	125	5.05	230	5.4	6.4	26	21	47.5	12.98	1.95	65.1	3.71	4.59	138	4.84	0.79	2.41	2.08	0
1	60	3	1	1	1	0	0	30	176	69.6	90	105	0.85	0	0	0	1	1	10	2	22.465	125.5	73.75	180	4.48	250	5.8	6.1	14	15	51.3	13.6	2.5	79	5.1	4.56	137.1	6.36	0.75	4.06	1.63	0
0	60	2	1	1	0	0	0	30	165	79.6	88	102	0.86	0	0	0	2	1	0	0	29.23	122.5	73.5	131	3.25	156	5.6	7.2	62	41	45.5	13.3	1.85	62	4.68	4.59	140.6	4.22	1.27	2.76	0.99	0
1	60	2	1	1	0	0	0	30	178	75	100	110	0.9	0	0	0	1	1	0	0	23.67	132.5	75	157	5.2	183	5.7	5.9	31	17	48.5	21.2	4.23	46.54	6.04	3.9	142.7	6.06	2.89	3.89	1.34	0
1	60	3	1	1	0	0	0	20	180	90	98	106	0.92	0	0	0	2	1	0	0	27.77	123	77	164	6.34	155	5.7	6.2	100	46	41.8	17.3	2.96	88.4	5.43	4.34	141.7	3.51	1.39	1.71	1.27	0
1	60	2	1	1	0	0	0	40	170	90.8	90.3	95.4	0.95	0	0	0	1	0	0	0	31.41	128	77.5	167	4.53	253	5.3	6	30	18	49.8	11.1	1.3	70.7	4.32	4.17	138.5	4.54	0.97	3.53	0.89	0
0	60	3	1	1	0	0	0	30	160	60.55	82	92	0.89	0	0	0	1	1	0	0	23.645	129.25	81	144	8.05	387	5.7	7	23	24	49.8	13.86	2.3	61	7.14	4.82	139	5.95	1.62	3.38	1.69	0
1	60	2	1	1	0	0	0	30	173	70	85	93	0.91	0	0	0	2	1	5	1	23.38	125.5	74.5	153	5.88	214	5.7	5.4	33	24	48	23.18	4.9	67.1	4.32	3.99	141	3.25	1.07	1.23	1.39	0
1	60	3	1	1	0	0	0	40	175	63	78	82	0.95	0	0	0	2	0	20	0	20.565	119.75	71.5	161	5.8	216	5.8	5.5	13	11	45.2	7.3	1.1	101.6	8.25	4.86	136.9	5.07	1.3	3.24	1.31	0
0	60	3	1	1	1	0	0	35	164	56	84	92	0.91	0	0	0	2	0	0	0	20.82	122	71	131	5.51	299	5.1	6	40	43	49	8.98	0.7	61.8	6.17	4.32	140.6	5.23	0.86	2.83	1.73	0
0	60	2	0	1	0	0	0	60	170	51.3	82	93	0.88	0	0	0	2	1	0	0	17.75	123.5	74	124	7.44	209	5.4	5.5	27	27	49.67	12.1	1.68	77	5.99	4.39	140.4	5.97	1.43	3.21	1.93	0
0	60	3	1	1	1	0	0	30	156	66.05	88	92	0.96	0	0	0	1	1	0	0	27.135	123	76.5	163	7.89	144	5.2	5.8	93	64	51.4	18.3	2.3	80.1	4.78	4.21	141.7	4.34	4.13	2.01	0.81	0
0	60	3	1	1	0	0	0	30	163	64	82	86	0.95	0	0	0	1	1	0	0	24.08	124	76.5	145	5.71	216	5.2	5.9	19	19	45.2	11.43	1.7	60	4.35	4.18	142.2	5.78	1.85	4.1	1.14	0
[truncated: 14,407 more rows]
