# Supplementary material for: Development and Validation of a Machine Learning-Based Risk Prediction Model for Ischemic Stroke-Diabetes Comorbidity
Source: Research Square preprint supplement (doi:10.21203/rs.3.rs-8265041/v1), 2025-12-23
Supplement: Supplementary file 3 [file ee59eb32a00dd3c77d785377.docx]

**Supplementary Table 1.**

Candidate Predictive Features and Their Coding Schemes

| **Category** | **Feature** | **Coding Scheme** |
| --- | --- | --- |
| **Demographics**​ | Gender | Female=0, Male=1 |
| Age | Continuous |
| Education Level | 1=Illiterate/semi-illiterate; 2=High school/vocational; 3=College+ |
| Marital Status | 0=Single; 1=Married; 2=Divorced/Widowed |
| Employment Status | 0=Unemployed; 1=Employed |
| ​**Family History** | Diabetes Family History | 0=No; 1=Yes |
| Stroke Family History | 0=No; 1=Yes |
| **Physiological** | Albumin(g/L) | Continuous |
| Hemoglobin(g/L) | Continuous |
| Platelet  (×10⁹/L) | Continuous |
| White Blood Cell  (×10⁹/L) | Continuous |
| BMI | Continuous |
| Urea Nitrogen(mmol/L) | Continuous |
| Direct Bilirubin (µmol/L) | Continuous |
| Diastolic Blood Pressure(mmHg) | Continuous |
| Fasting Glucose(mmol/L) | Continuous |
| HbA1c(%) | Continuous |
| HDL Cholesterol(mmol/L) | Continuous |
| Heigh(CM) | Continuous |
| Hip Circumference(CM) | Continuous |
| Serum Potassium(mmol/L) | Continuous |
| LDL Cholesterol(mmol/L) | Continuous |
| Serum Sodium(mmol/L) | Continuous |
| Systolic Blood Pressure(mmHg) | Continuous |
| Serum Creatinine(µmol/L) | Continuous |
| AST(U/L) | Continuous |
| ALT(U/L) | Continuous |
| Total Bilirubin(µmol/L) | Continuous |
| Total Cholesterol(mmol/L) | Continuous |
| Triglycerides(mmol/L) | Continuous |
| Waist Circumference | Continuous |
| Weight | Continuous |
| Waist-hip Ratio | Continuous |
| ​**Lifestyle** | Alcohol Frequency | 0=Never; 1=Occasional; 2=Daily |
|  | Exercise Frequency | 0=Never; 1=Occasional; 2=Daily |
|  | Exercise Duration (min) | Continuous |
|  | Dietary Habits | 0=Unhealthy; 1=Healthy |
|  | Daily Cigarette Consumption | Continuous |
|  | Sleep Quality | 0=Normal; 1=Disordered |
| **Mental Health** | Depression Screening | 0=Negative; 1=Positive |
| Emotional Status | 0=Normal; 1=Abnormal |
